# Supplementary material
Source: publisher figshare collection journal article supplement (https://springernature.figshare.com/ndownloader/files/18735515)
Supplement: Supplementary file 1 [file 18735515]

lat     lon      dep DWS 
41.0230 141.6500 0.0 0.0 4.80 Vp
41.0937 141.5763 0.0 0.0 4.80 Vp
41.1643 141.5024 0.0 0.0 4.80 Vp
41.2348 141.4284 0.0 0.0 4.80 Vp
41.3054 141.3542 0.0 0.0 4.80 Vp
41.3758 141.2798 0.0 0.0 4.80 Vp
41.4462 141.2053 0.0 0.0 4.80 Vp
41.5166 141.1306 0.0 0.0 4.80 Vp
41.5869 141.0558 0.0 0.0 4.80 Vp
41.6572 140.9808 0.0 0.0 4.80 Vp
41.7275 140.9056 0.0 0.0 4.80 Vp
41.7976 140.8303 0.0 0.0 4.80 Vp
41.8678 140.7548 0.0 0.0 4.80 Vp
41.9379 140.6791 0.0 0.0 4.80 Vp
42.0079 140.6033 0.0 0.0 4.80 Vp
42.0779 140.5273 0.0 0.0 4.80 Vp
42.1478 140.4511 0.0 0.0 4.80 Vp
42.2177 140.3748 0.0 0.0 4.80 Vp
42.2875 140.2983 0.0 0.0 4.80 Vp
42.3573 140.2216 0.0 0.0 4.80 Vp
42.4270 140.1448 0.0 0.0 4.80 Vp
41.0785 141.7437 0.0 0.0 4.80 Vp
41.1492 141.6701 0.0 0.0 4.80 Vp
41.2199 141.5962 0.0 0.0 4.80 Vp
41.2905 141.5222 0.0 0.0 4.80 Vp
41.3611 141.4481 0.0 0.0 4.80 Vp
41.4316 141.3738 0.0 0.0 4.80 Vp
41.5021 141.2993 0.0 0.0 4.80 Vp
41.5725 141.2247 0.0 0.0 4.80 Vp
41.6429 141.1498 0.0 0.0 4.80 Vp
41.7133 141.0749 0.0 0.0 4.80 Vp
41.7836 140.9997 0.0 0.0 4.80 Vp
41.8538 140.9244 0.0 0.0 4.80 Vp
41.9240 140.8490 0.0 0.0 4.80 Vp
41.9942 140.7733 0.0 0.0 4.80 Vp
42.0643 140.6975 0.0 0.0 4.80 Vp
42.1343 140.6216 0.0 0.0 4.80 Vp
42.2043 140.5454 0.0 0.0 4.80 Vp
42.2742 140.4691 0.0 0.0 4.80 Vp
42.3441 140.3927 0.0 0.0 4.80 Vp
42.4139 140.3160 0.0 0.0 4.80 Vp
42.4837 140.2392 0.0 0.0 4.80 Vp
41.1339 141.8377 0.0 0.0 4.80 Vp
41.2047 141.7640 0.0 0.0 4.80 Vp
41.2754 141.6903 0.0 0.0 4.80 Vp
41.3461 141.6163 0.0 0.0 4.80 Vp
41.4167 141.5422 0.0 0.0 4.80 Vp
41.4873 141.4679 0.0 0.0 4.80 Vp
41.5579 141.3934 0.0 0.0 4.80 Vp
41.6284 141.3188 0.0 0.0 4.80 Vp
41.6988 141.2441 0.0 0.0 4.80 Vp
41.7692 141.1691 0.0 0.0 4.80 Vp
41.8396 141.0940 0.0 0.0 4.80 Vp
41.9099 141.0188 0.0 0.0 4.80 Vp
41.9802 140.9433 0.0 0.0 4.80 Vp
42.0504 140.8677 0.0 0.0 4.80 Vp
42.1205 140.7920 0.0 0.0 4.80 Vp
42.1907 140.7160 0.0 0.0 4.80 Vp
42.2607 140.6399 0.0 0.0 4.80 Vp
42.3307 140.5637 0.0 0.0 4.80 Vp
42.4007 140.4872 0.0 0.0 4.80 Vp
42.4706 140.4106 0.0 0.0 4.80 Vp
42.5404 140.3339 0.0 0.0 4.80 Vp
41.1892 141.9318 0.0 0.0 4.80 Vp
41.2601 141.8582 0.0 0.0 4.80 Vp
41.3309 141.7844 0.0 0.0 4.80 Vp
41.4016 141.7105 0.0 0.0 4.80 Vp
41.4723 141.6364 0.0 0.0 4.80 Vp
41.5430 141.5622 0.0 0.0 4.80 Vp
41.6136 141.4878 0.0 0.0 4.80 Vp
41.6842 141.4132 0.0 0.0 4.80 Vp
41.7547 141.3385 0.0 0.0 4.80 Vp
41.8251 141.2636 0.0 0.0 4.80 Vp
41.8956 141.1885 0.0 0.0 4.80 Vp
41.9659 141.1133 0.0 0.0 4.80 Vp
42.0363 141.0379 0.0 0.0 4.80 Vp
42.1065 140.9623 0.0 0.0 4.80 Vp
42.1768 140.8866 0.0 0.0 4.80 Vp
42.2469 140.8107 0.0 0.0 4.80 Vp
42.3171 140.7346 0.0 0.0 4.80 Vp
42.3871 140.6584 0.0 0.0 4.80 Vp
42.4571 140.5820 0.0 0.0 4.80 Vp
42.5271 140.5054 0.0 0.0 4.80 Vp
42.5970 140.4287 0.0 0.0 4.80 Vp
41.2445 142.0260 0.0 0.0 4.80 Vp
41.3154 141.9525 0.0 0.0 4.80 Vp
41.3863 141.8788 0.0 0.0 4.80 Vp
41.4571 141.8049 0.0 0.0 4.80 Vp
41.5278 141.7308 0.0 0.0 4.80 Vp
41.5986 141.6566 0.0 0.0 4.80 Vp
41.6692 141.5823 0.0 0.0 4.80 Vp
41.7399 141.5077 0.0 0.0 4.80 Vp
41.8104 141.4330 0.0 0.0 4.80 Vp
41.8810 141.3582 0.0 0.0 4.80 Vp
41.9515 141.2831 0.0 0.0 4.80 Vp
42.0219 141.2079 0.0 0.0 4.80 Vp
42.0923 141.1326 0.0 0.0 4.80 Vp
42.1626 141.0571 0.0 0.0 4.80 Vp
42.2329 140.9814 0.0 0.0 4.80 Vp
42.3031 140.9055 0.0 0.0 4.80 Vp
42.3733 140.8295 0.0 0.0 4.80 Vp
42.4435 140.7533 0.0 0.0 4.80 Vp
42.5135 140.6769 0.0 0.0 4.80 Vp
42.5836 140.6004 0.0 0.0 4.80 Vp
42.6535 140.5237 0.0 0.0 4.80 Vp
41.2997 142.1205 0.0 0.0 4.80 Vp
41.3706 142.0469 0.0 0.0 4.80 Vp
41.4416 141.9733 0.0 0.0 4.80 Vp
41.5124 141.8994 0.0 0.0 4.80 Vp
41.5833 141.8254 0.0 0.0 4.80 Vp
41.6541 141.7513 0.0 0.0 4.80 Vp
41.7248 141.6769 0.0 0.0 4.80 Vp
41.7955 141.6024 0.0 0.0 4.80 Vp
41.8661 141.5278 0.0 0.0 4.80 Vp
41.9367 141.4529 0.0 0.0 4.80 Vp
42.0073 141.3780 0.0 0.0 4.80 Vp
42.0778 141.3028 0.0 0.0 4.80 Vp
42.1482 141.2275 0.0 0.0 4.80 Vp
42.2186 141.1520 0.0 0.0 4.80 Vp
42.2890 141.0763 0.0 0.0 4.80 Vp
42.3593 141.0005 0.0 0.0 4.80 Vp
42.4295 140.9245 0.0 0.0 4.80 Vp
42.4997 140.8483 0.0 0.0 4.80 Vp
42.5699 140.7720 0.0 0.0 4.80 Vp
42.6400 140.6955 0.0 0.0 4.80 Vp
42.7100 140.6188 0.0 0.0 4.80 Vp
41.3548 142.2150 0.0 0.0 4.80 Vp
41.4258 142.1416 0.0 0.0 4.80 Vp
41.4968 142.0679 0.0 0.0 4.80 Vp
41.5677 141.9941 0.0 0.0 4.80 Vp
41.6386 141.9202 0.0 0.0 4.80 Vp
41.7095 141.8461 0.0 0.0 4.80 Vp
41.7803 141.7718 0.0 0.0 4.80 Vp
41.8510 141.6973 0.0 0.0 4.80 Vp
41.9217 141.6227 0.0 0.0 4.80 Vp
41.9924 141.5479 0.0 0.0 4.80 Vp
42.0630 141.4729 0.0 0.0 4.80 Vp
42.1336 141.3978 0.0 0.0 4.80 Vp
42.2041 141.3225 0.0 0.0 4.80 Vp
42.2746 141.2471 0.0 0.0 4.80 Vp
42.3450 141.1715 0.0 0.0 4.80 Vp
42.4153 141.0957 0.0 0.0 4.80 Vp
42.4857 141.0197 0.0 0.0 4.80 Vp
42.5559 140.9436 0.0 0.0 4.80 Vp
42.6261 140.8673 0.0 0.0 4.80 Vp
42.6963 140.7908 0.0 0.0 4.80 Vp
42.7664 140.7142 0.0 0.0 4.80 Vp
41.4098 142.3098 0.0 0.0 4.80 Vp
41.4809 142.2364 0.0 0.0 4.80 Vp
41.5520 142.1628 0.0 0.0 4.80 Vp
41.6230 142.0890 0.0 0.0 4.80 Vp
41.6939 142.0151 0.0 0.0 4.80 Vp
41.7648 141.9410 0.0 0.0 4.80 Vp
41.8357 141.8668 0.0 0.0 4.80 Vp
41.9065 141.7924 0.0 0.0 4.80 Vp
41.9773 141.7178 0.0 0.0 4.80 Vp
42.0480 141.6430 0.0 0.0 4.80 Vp
42.1187 141.5681 0.0 0.0 4.80 Vp
42.1893 141.4930 0.0 0.0 4.80 Vp
42.2599 141.4178 0.0 0.0 4.80 Vp
42.3304 141.3423 0.0 0.0 4.80 Vp
42.4009 141.2668 0.0 0.0 4.80 Vp
42.4713 141.1910 0.0 0.0 4.80 Vp
42.5417 141.1151 0.0 0.0 4.80 Vp
42.6120 141.0390 0.0 0.0 4.80 Vp
42.6823 140.9627 0.0 0.0 4.80 Vp
42.7525 140.8863 0.0 0.0 4.80 Vp
42.8227 140.8097 0.0 0.0 4.80 Vp
41.4648 142.4047 0.0 0.0 4.80 Vp
41.5359 142.3313 0.0 0.0 4.80 Vp
41.6070 142.2578 0.0 0.0 4.80 Vp
41.6781 142.1841 0.0 0.0 4.80 Vp
41.7491 142.1102 0.0 0.0 4.80 Vp
41.8201 142.0361 0.0 0.0 4.80 Vp
41.8910 141.9619 0.0 0.0 4.80 Vp
41.9619 141.8876 0.0 0.0 4.80 Vp
42.0327 141.8130 0.0 0.0 4.80 Vp
42.1035 141.7383 0.0 0.0 4.80 Vp
42.1743 141.6634 0.0 0.0 4.80 Vp
42.2450 141.5884 0.0 0.0 4.80 Vp
42.3156 141.5132 0.0 0.0 4.80 Vp
42.3862 141.4378 0.0 0.0 4.80 Vp
42.4567 141.3622 0.0 0.0 4.80 Vp
42.5272 141.2865 0.0 0.0 4.80 Vp
42.5977 141.2106 0.0 0.0 4.80 Vp
42.6681 141.1346 0.0 0.0 4.80 Vp
42.7384 141.0583 0.0 0.0 4.80 Vp
42.8087 140.9820 0.0 0.0 4.80 Vp
42.8789 140.9054 0.0 0.0 4.80 Vp
41.5197 142.4998 0.0 0.0 4.80 Vp
41.5909 142.4264 0.0 0.0 4.80 Vp
41.6620 142.3530 0.0 0.0 4.80 Vp
41.7332 142.2793 0.0 0.0 4.80 Vp
41.8043 142.2054 0.0 0.0 4.80 Vp
41.8753 142.1314 0.0 0.0 4.80 Vp
41.9463 142.0573 0.0 0.0 4.80 Vp
42.0172 141.9829 0.0 0.0 4.80 Vp
42.0881 141.9084 0.0 0.0 4.80 Vp
42.1590 141.8338 0.0 0.0 4.80 Vp
42.2298 141.7589 0.0 0.0 4.80 Vp
42.3005 141.6839 0.0 0.0 4.80 Vp
42.3712 141.6087 0.0 0.0 4.80 Vp
42.4419 141.5334 0.0 0.0 4.80 Vp
42.5125 141.4579 0.0 0.0 4.80 Vp
42.5831 141.3822 0.0 0.0 4.80 Vp
42.6536 141.3064 0.0 0.0 4.80 Vp
42.7240 141.2303 0.0 0.0 4.80 Vp
42.7944 141.1542 0.0 0.0 4.80 Vp
42.8647 141.0778 0.0 0.0 4.80 Vp
42.9350 141.0013 0.0 0.0 4.80 Vp
41.5745 142.5950 0.0 0.0 4.80 Vp
41.6457 142.5217 0.0 0.0 4.80 Vp
41.7170 142.4483 0.0 0.0 4.80 Vp
41.7882 142.3746 0.0 0.0 4.80 Vp
41.8593 142.3009 0.0 0.0 4.80 Vp
41.9304 142.2269 0.0 0.0 4.80 Vp
42.0015 142.1528 0.0 0.0 4.80 Vp
42.0725 142.0785 0.0 0.0 4.80 Vp
42.1434 142.0040 0.0 0.0 4.80 Vp
42.2144 141.9294 0.0 0.0 4.80 Vp
42.2852 141.8546 0.0 0.0 4.80 Vp
42.3560 141.7796 0.0 0.0 4.80 Vp
42.4268 141.7045 0.0 0.0 4.80 Vp
42.4975 141.6292 0.0 0.0 4.80 Vp
42.5682 141.5537 0.0 0.0 4.80 Vp
42.6388 141.4781 0.0 0.0 4.80 Vp
42.7094 141.4023 0.0 0.0 4.80 Vp
42.7799 141.3263 0.0 0.0 4.80 Vp
42.8503 141.2501 0.0 0.0 4.80 Vp
42.9208 141.1738 0.0 0.0 4.80 Vp
42.9911 141.0973 0.0 0.0 4.80 Vp
41.6292 142.6904 0.0 0.0 4.80 Vp
41.7005 142.6172 0.0 0.0 4.80 Vp
41.7718 142.5438 0.0 0.0 4.80 Vp
41.8431 142.4702 0.0 0.0 4.80 Vp
41.9143 142.3964 0.0 0.0 4.80 Vp
41.9855 142.3225 0.0 0.0 4.80 Vp
42.0566 142.2484 0.0 0.0 4.80 Vp
42.1276 142.1742 0.0 0.0 4.80 Vp
42.1987 142.0998 0.0 0.0 4.80 Vp
42.2696 142.0252 0.0 0.0 4.80 Vp
42.3406 141.9504 0.0 0.0 4.80 Vp
42.4115 141.8755 0.0 0.0 4.80 Vp
42.4823 141.8004 0.0 0.0 4.80 Vp
42.5531 141.7252 0.0 0.0 4.80 Vp
42.6238 141.6497 0.0 0.0 4.80 Vp
42.6945 141.5741 0.0 0.0 4.80 Vp
42.7651 141.4984 0.0 0.0 4.80 Vp
42.8357 141.4224 0.0 0.0 4.80 Vp
42.9062 141.3463 0.0 0.0 4.80 Vp
42.9767 141.2700 0.0 0.0 4.80 Vp
43.0471 141.1936 0.0 0.0 4.80 Vp
41.6838 142.7860 0.0 0.0 4.80 Vp
41.7552 142.7128 0.0 0.0 4.80 Vp
41.8266 142.6394 0.0 0.0 4.80 Vp
41.8979 142.5659 0.0 0.0 4.80 Vp
41.9692 142.4922 0.0 0.0 4.80 Vp
42.0404 142.4183 0.0 0.0 4.80 Vp
42.1116 142.3443 0.0 0.0 4.80 Vp
42.1827 142.2701 0.0 0.0 4.80 Vp
42.2538 142.1957 0.0 0.0 4.80 Vp
42.3249 142.1212 0.0 0.0 4.80 Vp
42.3959 142.0464 0.0 2.9 4.80 Vp
42.4668 141.9716 0.0 416.4 4.50 Vp
42.5377 141.8965 0.0 0.8 4.80 Vp
42.6085 141.8213 0.0 1197.2 4.39 Vp
42.6793 141.7459 0.0 48.4 4.52 Vp
42.7501 141.6703 0.0 0.0 4.80 Vp
42.8208 141.5946 0.0 0.0 4.80 Vp
42.8914 141.5187 0.0 0.0 4.80 Vp
42.9620 141.4426 0.0 0.0 4.80 Vp
43.0325 141.3664 0.0 0.0 4.80 Vp
43.1030 141.2900 0.0 0.0 4.80 Vp
41.7384 142.8817 0.0 0.0 4.80 Vp
41.8099 142.8086 0.0 0.0 4.80 Vp
41.8813 142.7353 0.0 0.0 4.80 Vp
41.9527 142.6618 0.0 0.0 4.80 Vp
42.0240 142.5881 0.0 0.0 4.80 Vp
42.0953 142.5143 0.0 0.0 4.80 Vp
42.1665 142.4403 0.0 0.0 4.80 Vp
42.2377 142.3661 0.0 5.1 4.80 Vp
42.3089 142.2918 0.0 28.0 4.38 Vp
42.3800 142.2173 0.0 9.4 4.80 Vp
42.4510 142.1426 0.0 26.4 4.79 Vp
42.5221 142.0678 0.0 1291.7 4.55 Vp
42.5930 141.9928 0.0 32.2 4.64 Vp
42.6639 141.9176 0.0 1514.9 4.16 Vp
42.7348 141.8423 0.0 176.5 4.20 Vp
42.8056 141.7667 0.0 0.0 4.80 Vp
42.8763 141.6910 0.0 0.0 4.80 Vp
42.9470 141.6152 0.0 0.0 4.80 Vp
43.0177 141.5391 0.0 0.0 4.80 Vp
43.0883 141.4629 0.0 0.0 4.80 Vp
43.1588 141.3866 0.0 0.0 4.80 Vp
41.7657 142.9297 0.0 0.0 4.80 Vp
41.8372 142.8565 0.0 0.0 4.80 Vp
41.9086 142.7832 0.0 0.0 4.80 Vp
41.9800 142.7098 0.0 0.0 4.80 Vp
42.0514 142.6361 0.0 0.0 4.80 Vp
42.1227 142.5623 0.0 0.0 4.80 Vp
42.1940 142.4884 0.0 0.0 4.80 Vp
42.2652 142.4142 0.0 22.8 4.17 Vp
42.3364 142.3399 0.0 1096.4 3.60 Vp
42.4075 142.2654 0.0 131.7 3.45 Vp
42.4786 142.1908 0.0 187.4 4.27 Vp
42.5497 142.1160 0.0 264.2 4.36 Vp
42.6206 142.0410 0.0 102.7 4.31 Vp
42.6916 141.9658 0.0 4.5 4.80 Vp
42.7625 141.8905 0.0 0.5 4.80 Vp
42.8333 141.8150 0.0 0.0 4.80 Vp
42.9041 141.7393 0.0 0.0 4.80 Vp
42.9748 141.6635 0.0 0.0 4.80 Vp
43.0455 141.5875 0.0 0.0 4.80 Vp
43.1161 141.5113 0.0 0.0 4.80 Vp
43.1867 141.4349 0.0 0.0 4.80 Vp
41.7929 142.9776 0.0 0.0 4.80 Vp
41.8644 142.9045 0.0 0.0 4.80 Vp
41.9359 142.8313 0.0 0.0 4.80 Vp
42.0074 142.7578 0.0 0.0 4.80 Vp
42.0788 142.6842 0.0 0.0 4.80 Vp
42.1501 142.6104 0.0 0.0 4.80 Vp
42.2214 142.5365 0.0 0.2 4.80 Vp
42.2927 142.4624 0.0 27.5 4.66 Vp
42.3639 142.3881 0.0 942.9 3.64 Vp
42.4350 142.3136 0.0 27.3 4.80 Vp
42.5062 142.2390 0.0 57.1 4.36 Vp
42.5772 142.1642 0.0 106.1 4.26 Vp
42.6483 142.0892 0.0 139.6 4.07 Vp
42.7192 142.0141 0.0 0.4 4.80 Vp
42.7901 141.9388 0.0 13.0 4.80 Vp
42.8610 141.8633 0.0 0.0 4.80 Vp
42.9318 141.7876 0.0 0.0 4.80 Vp
43.0026 141.7118 0.0 0.0 4.80 Vp
43.0733 141.6358 0.0 0.0 4.80 Vp
43.1440 141.5597 0.0 0.0 4.80 Vp
43.2146 141.4833 0.0 0.0 4.80 Vp
41.8201 143.0257 0.0 0.0 4.80 Vp
41.8917 142.9526 0.0 0.0 4.80 Vp
41.9632 142.8793 0.0 0.0 4.80 Vp
42.0347 142.8059 0.0 0.0 4.80 Vp
42.1061 142.7323 0.0 0.0 4.80 Vp
42.1775 142.6585 0.0 4.8 4.80 Vp
42.2488 142.5846 0.0 1826.0 5.40 Vp
42.3201 142.5105 0.0 784.7 5.24 Vp
42.3913 142.4363 0.0 28.2 4.80 Vp
42.4625 142.3618 0.0 8.7 4.80 Vp
42.5337 142.2872 0.0 9.9 4.80 Vp
42.6048 142.2124 0.0 8.0 4.80 Vp
42.6758 142.1375 0.0 6.5 4.80 Vp
42.7468 142.0624 0.0 128.1 4.32 Vp
42.8178 141.9871 0.0 136.7 4.65 Vp
42.8887 141.9117 0.0 241.0 5.07 Vp
42.9596 141.8360 0.0 0.0 4.80 Vp
43.0303 141.7602 0.0 0.0 4.80 Vp
43.1011 141.6842 0.0 0.0 4.80 Vp
43.1718 141.6081 0.0 0.0 4.80 Vp
43.2424 141.5318 0.0 0.0 4.80 Vp
41.8473 143.0737 0.0 0.0 4.80 Vp
41.9189 143.0006 0.0 0.0 4.80 Vp
41.9904 142.9274 0.0 0.0 4.80 Vp
42.0620 142.8540 0.0 0.0 4.80 Vp
42.1334 142.7804 0.0 0.0 4.80 Vp
42.2048 142.7067 0.0 531.6 4.05 Vp
42.2762 142.6328 0.0 2853.4 5.12 Vp
42.3475 142.5587 0.0 1062.7 4.99 Vp
42.4188 142.4845 0.0 1117.9 4.88 Vp
42.4900 142.4101 0.0 173.8 4.03 Vp
42.5612 142.3355 0.0 895.9 4.43 Vp
42.6323 142.2608 0.0 447.5 4.17 Vp
42.7034 142.1858 0.0 674.2 4.44 Vp
42.7745 142.1107 0.0 79.8 4.46 Vp
42.8454 142.0355 0.0 54.0 4.69 Vp
42.9164 141.9600 0.0 2.4 4.80 Vp
42.9872 141.8844 0.0 0.0 4.80 Vp
43.0581 141.8087 0.0 0.0 4.80 Vp
43.1289 141.7327 0.0 0.0 4.80 Vp
43.1996 141.6566 0.0 0.0 4.80 Vp
43.2702 141.5803 0.0 0.0 4.80 Vp
41.8745 143.1218 0.0 0.0 4.80 Vp
41.9461 143.0488 0.0 0.0 4.80 Vp
42.0177 142.9756 0.0 0.0 4.80 Vp
42.0892 142.9022 0.0 0.0 4.80 Vp
42.1607 142.8286 0.0 0.0 4.80 Vp
42.2322 142.7549 0.0 1429.6 3.90 Vp
42.3036 142.6810 0.0 1516.7 4.86 Vp
42.3749 142.6070 0.0 585.9 4.92 Vp
42.4462 142.5328 0.0 2074.8 4.93 Vp
42.5175 142.4584 0.0 250.9 3.87 Vp
42.5887 142.3838 0.0 2575.0 4.55 Vp
42.6599 142.3091 0.0 980.3 4.17 Vp
42.7310 142.2342 0.0 965.4 4.09 Vp
42.8020 142.1591 0.0 258.0 4.54 Vp
42.8731 142.0839 0.0 724.4 5.03 Vp
42.9440 142.0085 0.0 382.0 5.36 Vp
43.0149 141.9329 0.0 0.0 4.80 Vp
43.0858 141.8571 0.0 0.0 4.80 Vp
43.1566 141.7812 0.0 0.0 4.80 Vp
43.2273 141.7051 0.0 0.0 4.80 Vp
43.2980 141.6288 0.0 0.0 4.80 Vp
41.9016 143.1699 0.0 0.0 4.80 Vp
41.9733 143.0969 0.0 0.0 4.80 Vp
42.0449 143.0237 0.0 0.0 4.80 Vp
42.1165 142.9504 0.0 0.0 4.80 Vp
42.1880 142.8769 0.0 0.0 4.80 Vp
42.2595 142.8032 0.0 0.0 4.80 Vp
42.3309 142.7293 0.0 3355.5 5.16 Vp
42.4023 142.6553 0.0 220.9 5.38 Vp
42.4736 142.5811 0.0 56.5 4.65 Vp
42.5449 142.5067 0.0 11.9 4.80 Vp
42.6162 142.4322 0.0 70.3 4.75 Vp
42.6874 142.3575 0.0 460.2 4.68 Vp
42.7585 142.2826 0.0 26.2 4.76 Vp
42.8296 142.2076 0.0 383.9 4.30 Vp
42.9006 142.1323 0.0 884.0 4.69 Vp
42.9716 142.0569 0.0 0.0 4.80 Vp
43.0426 141.9814 0.0 0.0 4.80 Vp
43.1135 141.9056 0.0 0.0 4.80 Vp
43.1843 141.8297 0.0 0.0 4.80 Vp
43.2551 141.7536 0.0 0.0 4.80 Vp
43.3258 141.6774 0.0 0.0 4.80 Vp
41.9288 143.2181 0.0 0.0 4.80 Vp
42.0005 143.1451 0.0 0.0 4.80 Vp
42.0721 143.0720 0.0 0.0 4.80 Vp
42.1437 142.9986 0.0 0.0 4.80 Vp
42.2153 142.9251 0.0 0.0 4.80 Vp
42.2868 142.8515 0.0 0.0 4.80 Vp
42.3582 142.7776 0.0 209.6 5.04 Vp
42.4296 142.7036 0.0 98.8 4.89 Vp
42.5010 142.6295 0.0 215.3 4.51 Vp
42.5723 142.5551 0.0 2790.6 5.43 Vp
42.6436 142.4806 0.0 1398.2 5.34 Vp
42.7148 142.4059 0.0 5221.0 4.97 Vp
42.7860 142.3311 0.0 3315.8 6.43 Vp
42.8571 142.2560 0.0 14.7 4.80 Vp
42.9282 142.1808 0.0 5.1 4.80 Vp
42.9992 142.1055 0.0 0.0 4.80 Vp
43.0702 142.0299 0.0 0.0 4.80 Vp
43.1411 141.9542 0.0 0.0 4.80 Vp
43.2120 141.8783 0.0 0.0 4.80 Vp
43.2828 141.8023 0.0 0.0 4.80 Vp
43.3536 141.7260 0.0 0.0 4.80 Vp
41.9559 143.2663 0.0 0.0 4.80 Vp
42.0276 143.1934 0.0 0.0 4.80 Vp
42.0993 143.1202 0.0 0.0 4.80 Vp
42.1709 143.0469 0.0 0.0 4.80 Vp
42.2425 142.9734 0.0 0.0 4.80 Vp
42.3140 142.8998 0.0 0.0 4.80 Vp
42.3855 142.8260 0.0 0.0 4.80 Vp
42.4570 142.7520 0.0 0.0 4.80 Vp
42.5284 142.6779 0.0 61.8 4.39 Vp
42.5997 142.6035 0.0 855.5 4.96 Vp
42.6710 142.5291 0.0 172.3 5.19 Vp
42.7423 142.4544 0.0 701.0 5.10 Vp
42.8135 142.3796 0.0 1666.8 5.55 Vp
42.8847 142.3046 0.0 5.1 4.80 Vp
42.9558 142.2294 0.0 1.4 4.80 Vp
43.0268 142.1540 0.0 0.0 4.80 Vp
43.0978 142.0785 0.0 0.0 4.80 Vp
43.1688 142.0028 0.0 0.0 4.80 Vp
43.2397 141.9269 0.0 0.0 4.80 Vp
43.3105 141.8509 0.0 0.0 4.80 Vp
43.3813 141.7747 0.0 0.0 4.80 Vp
41.9830 143.3146 0.0 0.0 4.80 Vp
42.0547 143.2416 0.0 0.0 4.80 Vp
42.1264 143.1685 0.0 0.0 4.80 Vp
42.1981 143.0952 0.0 0.0 4.80 Vp
42.2697 143.0218 0.0 0.0 4.80 Vp
42.3413 142.9482 0.0 0.0 4.80 Vp
42.4128 142.8744 0.0 0.0 4.80 Vp
42.4843 142.8004 0.0 0.0 4.80 Vp
42.5557 142.7263 0.0 0.0 4.80 Vp
42.6271 142.6520 0.0 24.9 5.06 Vp
42.6984 142.5775 0.0 7.1 4.80 Vp
42.7697 142.5029 0.0 3.5 4.80 Vp
42.8410 142.4281 0.0 93.7 4.75 Vp
42.9122 142.3531 0.0 134.1 4.98 Vp
42.9833 142.2780 0.0 68.5 5.15 Vp
43.0544 142.2026 0.0 0.0 4.80 Vp
43.1254 142.1271 0.0 0.0 4.80 Vp
43.1964 142.0515 0.0 0.0 4.80 Vp
43.2673 141.9756 0.0 0.0 4.80 Vp
43.3382 141.8996 0.0 0.0 4.80 Vp
43.4091 141.8234 0.0 0.0 4.80 Vp
42.0101 143.3629 0.0 0.0 4.80 Vp
42.0818 143.2900 0.0 0.0 4.80 Vp
42.1536 143.2169 0.0 0.0 4.80 Vp
42.2253 143.1436 0.0 0.0 4.80 Vp
42.2969 143.0702 0.0 0.0 4.80 Vp
42.3685 142.9966 0.0 0.0 4.80 Vp
42.4401 142.9228 0.0 0.0 4.80 Vp
42.5116 142.8489 0.0 0.0 4.80 Vp
42.5830 142.7748 0.0 0.0 4.80 Vp
42.6545 142.7005 0.0 493.0 5.99 Vp
42.7258 142.6261 0.0 121.7 5.17 Vp
42.7971 142.5515 0.0 0.8 4.80 Vp
42.8684 142.4767 0.0 1700.5 4.78 Vp
42.9396 142.4017 0.0 613.0 4.77 Vp
43.0108 142.3266 0.0 33.8 5.07 Vp
43.0819 142.2513 0.0 0.0 4.80 Vp
43.1530 142.1758 0.0 0.0 4.80 Vp
43.2240 142.1002 0.0 0.0 4.80 Vp
43.2950 142.0243 0.0 0.0 4.80 Vp
43.3659 141.9483 0.0 0.0 4.80 Vp
43.4368 141.8722 0.0 0.0 4.80 Vp
42.0371 143.4112 0.0 0.0 4.80 Vp
42.1089 143.3383 0.0 0.0 4.80 Vp
42.1807 143.2653 0.0 0.0 4.80 Vp
42.2524 143.1920 0.0 0.0 4.80 Vp
42.3241 143.1186 0.0 0.0 4.80 Vp
42.3957 143.0451 0.0 0.0 4.80 Vp
42.4673 142.9713 0.0 0.0 4.80 Vp
42.5388 142.8974 0.0 41.1 5.15 Vp
42.6103 142.8233 0.0 5.8 4.80 Vp
42.6818 142.7491 0.0 41.0 5.21 Vp
42.7532 142.6747 0.0 0.0 4.80 Vp
42.8245 142.6001 0.0 0.0 4.80 Vp
42.8958 142.5253 0.0 157.8 4.51 Vp
42.9671 142.4504 0.0 29.5 4.69 Vp
43.0383 142.3753 0.0 0.0 4.80 Vp
43.1095 142.3000 0.0 0.0 4.80 Vp
43.1806 142.2245 0.0 0.0 4.80 Vp
43.2516 142.1489 0.0 0.0 4.80 Vp
43.3226 142.0731 0.0 0.0 4.80 Vp
43.3935 141.9971 0.0 0.0 4.80 Vp
43.4644 141.9210 0.0 0.0 4.80 Vp
42.0641 143.4596 0.0 0.0 4.80 Vp
42.1360 143.3867 0.0 0.0 4.80 Vp
42.2078 143.3137 0.0 0.0 4.80 Vp
42.2795 143.2405 0.0 0.0 4.80 Vp
42.3512 143.1671 0.0 0.0 4.80 Vp
42.4229 143.0936 0.0 0.0 4.80 Vp
42.4945 143.0199 0.0 0.0 4.80 Vp
42.5661 142.9460 0.0 462.1 5.27 Vp
42.6376 142.8719 0.0 143.9 4.77 Vp
42.7091 142.7977 0.0 0.0 4.80 Vp
42.7805 142.7233 0.0 0.0 4.80 Vp
42.8519 142.6487 0.0 2.3 4.80 Vp
42.9232 142.5740 0.0 6.7 4.80 Vp
42.9945 142.4991 0.0 3.2 4.80 Vp
43.0658 142.4240 0.0 0.0 4.80 Vp
43.1369 142.3487 0.0 0.0 4.80 Vp
43.2081 142.2733 0.0 0.0 4.80 Vp
43.2792 142.1977 0.0 0.0 4.80 Vp
43.3502 142.1219 0.0 0.0 4.80 Vp
43.4212 142.0459 0.0 0.0 4.80 Vp
43.4921 141.9698 0.0 0.0 4.80 Vp
42.0912 143.5080 0.0 0.0 4.80 Vp
42.1630 143.4352 0.0 0.0 4.80 Vp
42.2349 143.3622 0.0 0.0 4.80 Vp
42.3066 143.2890 0.0 0.0 4.80 Vp
42.3784 143.2156 0.0 0.0 4.80 Vp
42.4501 143.1421 0.0 0.0 4.80 Vp
42.5217 143.0684 0.0 0.0 4.80 Vp
42.5933 142.9946 0.0 0.0 4.80 Vp
42.6649 142.9205 0.0 5.1 4.80 Vp
42.7364 142.8463 0.0 29.6 4.80 Vp
42.8079 142.7720 0.0 21.1 4.80 Vp
42.8793 142.6974 0.0 227.5 5.77 Vp
42.9506 142.6227 0.0 164.3 5.64 Vp
43.0219 142.5478 0.0 0.0 4.80 Vp
43.0932 142.4727 0.0 0.0 4.80 Vp
43.1644 142.3975 0.0 0.0 4.80 Vp
43.2356 142.3221 0.0 0.0 4.80 Vp
43.3067 142.2465 0.0 0.0 4.80 Vp
43.3778 142.1707 0.0 0.0 4.80 Vp
43.4488 142.0948 0.0 0.0 4.80 Vp
43.5197 142.0187 0.0 0.0 4.80 Vp
42.1182 143.5565 0.0 0.0 4.80 Vp
42.1901 143.4837 0.0 0.0 4.80 Vp
42.2619 143.4107 0.0 0.0 4.80 Vp
42.3337 143.3375 0.0 0.0 4.80 Vp
42.4055 143.2642 0.0 0.0 4.80 Vp
42.4772 143.1907 0.0 0.0 4.80 Vp
42.5489 143.1170 0.0 0.0 4.80 Vp
42.6205 143.0432 0.0 0.0 4.80 Vp
42.6921 142.9692 0.0 0.0 4.80 Vp
42.7637 142.8950 0.0 0.0 4.80 Vp
42.8352 142.8207 0.0 664.1 5.24 Vp
42.9066 142.7461 0.0 0.0 4.80 Vp
42.9780 142.6714 0.0 0.0 4.80 Vp
43.0493 142.5966 0.0 0.0 4.80 Vp
43.1206 142.5215 0.0 0.0 4.80 Vp
43.1919 142.4463 0.0 0.0 4.80 Vp
43.2631 142.3709 0.0 0.0 4.80 Vp
43.3342 142.2954 0.0 0.0 4.80 Vp
43.4053 142.2196 0.0 0.0 4.80 Vp
43.4764 142.1437 0.0 0.0 4.80 Vp
43.5473 142.0676 0.0 0.0 4.80 Vp
42.1451 143.6050 0.0 0.0 4.80 Vp
42.2171 143.5322 0.0 0.0 4.80 Vp
42.2889 143.4592 0.0 0.0 4.80 Vp
42.3608 143.3861 0.0 0.0 4.80 Vp
42.4326 143.3128 0.0 0.0 4.80 Vp
42.5043 143.2393 0.0 0.0 4.80 Vp
42.5761 143.1657 0.0 0.0 4.80 Vp
42.6477 143.0919 0.0 0.0 4.80 Vp
42.7193 143.0179 0.0 0.0 4.80 Vp
42.7909 142.9437 0.0 0.0 4.80 Vp
42.8624 142.8694 0.0 0.0 4.80 Vp
42.9339 142.7949 0.0 0.0 4.80 Vp
43.0053 142.7202 0.0 0.0 4.80 Vp
43.0767 142.6454 0.0 0.0 4.80 Vp
43.1480 142.5704 0.0 0.0 4.80 Vp
43.2193 142.4952 0.0 0.0 4.80 Vp
43.2906 142.4198 0.0 0.0 4.80 Vp
43.3617 142.3443 0.0 0.0 4.80 Vp
43.4328 142.2686 0.0 0.0 4.80 Vp
43.5039 142.1927 0.0 0.0 4.80 Vp
43.5749 142.1166 0.0 0.0 4.80 Vp
42.1721 143.6535 0.0 0.0 4.80 Vp
42.2440 143.5807 0.0 0.0 4.80 Vp
42.3160 143.5078 0.0 0.0 4.80 Vp
42.3878 143.4347 0.0 0.0 4.80 Vp
42.4597 143.3614 0.0 0.0 4.80 Vp
42.5315 143.2880 0.0 0.0 4.80 Vp
42.6032 143.2144 0.0 0.0 4.80 Vp
42.6749 143.1406 0.0 0.0 4.80 Vp
42.7465 143.0666 0.0 0.0 4.80 Vp
42.8181 142.9925 0.0 0.0 4.80 Vp
42.8897 142.9182 0.0 0.0 4.80 Vp
42.9612 142.8437 0.0 0.0 4.80 Vp
43.0327 142.7691 0.0 0.0 4.80 Vp
43.1041 142.6943 0.0 0.0 4.80 Vp
43.1754 142.6193 0.0 0.0 4.80 Vp
43.2467 142.5441 0.0 0.0 4.80 Vp
43.3180 142.4688 0.0 0.0 4.80 Vp
43.3892 142.3932 0.0 0.0 4.80 Vp
43.4604 142.3176 0.0 0.0 4.80 Vp
43.5315 142.2417 0.0 0.0 4.80 Vp
43.6025 142.1656 0.0 0.0 4.80 Vp
42.1990 143.7021 0.0 0.0 4.80 Vp
42.2710 143.6294 0.0 0.0 4.80 Vp
42.3429 143.5565 0.0 0.0 4.80 Vp
42.4149 143.4834 0.0 0.0 4.80 Vp
42.4867 143.4101 0.0 0.0 4.80 Vp
42.5585 143.3367 0.0 0.0 4.80 Vp
42.6303 143.2631 0.0 0.0 4.80 Vp
42.7020 143.1894 0.0 0.0 4.80 Vp
42.7737 143.1154 0.0 0.0 4.80 Vp
42.8454 143.0413 0.0 0.0 4.80 Vp
42.9169 142.9671 0.0 0.0 4.80 Vp
42.9885 142.8926 0.0 0.0 4.80 Vp
43.0600 142.8180 0.0 0.0 4.80 Vp
43.1314 142.7432 0.0 0.0 4.80 Vp
43.2028 142.6682 0.0 0.0 4.80 Vp
43.2741 142.5930 0.0 0.0 4.80 Vp
43.3454 142.5177 0.0 0.0 4.80 Vp
43.4167 142.4422 0.0 0.0 4.80 Vp
43.4878 142.3666 0.0 0.0 4.80 Vp
43.5590 142.2907 0.0 0.0 4.80 Vp
43.6301 142.2147 0.0 0.0 4.80 Vp
42.2259 143.7507 0.0 0.0 4.80 Vp
42.2979 143.6780 0.0 0.0 4.80 Vp
42.3699 143.6051 0.0 0.0 4.80 Vp
42.4419 143.5321 0.0 0.0 4.80 Vp
42.5137 143.4588 0.0 0.0 4.80 Vp
42.5856 143.3855 0.0 0.0 4.80 Vp
42.6574 143.3119 0.0 0.0 4.80 Vp
42.7292 143.2382 0.0 0.0 4.80 Vp
42.8009 143.1642 0.0 0.0 4.80 Vp
42.8725 143.0902 0.0 0.0 4.80 Vp
42.9442 143.0159 0.0 0.0 4.80 Vp
43.0157 142.9415 0.0 0.0 4.80 Vp
43.0872 142.8669 0.0 0.0 4.80 Vp
43.1587 142.7921 0.0 0.0 4.80 Vp
43.2301 142.7172 0.0 0.0 4.80 Vp
43.3015 142.6421 0.0 0.0 4.80 Vp
43.3728 142.5668 0.0 0.0 4.80 Vp
43.4441 142.4913 0.0 0.0 4.80 Vp
43.5153 142.4156 0.0 0.0 4.80 Vp
43.5865 142.3398 0.0 0.0 4.80 Vp
43.6576 142.2638 0.0 0.0 4.80 Vp
42.2528 143.7994 0.0 0.0 4.80 Vp
42.3249 143.7267 0.0 0.0 4.80 Vp
42.3969 143.6538 0.0 0.0 4.80 Vp
42.4688 143.5808 0.0 0.0 4.80 Vp
42.5408 143.5076 0.0 0.0 4.80 Vp
42.6126 143.4342 0.0 0.0 4.80 Vp
42.6845 143.3607 0.0 0.0 4.80 Vp
42.7563 143.2870 0.0 0.0 4.80 Vp
42.8280 143.2131 0.0 0.0 4.80 Vp
42.8997 143.1391 0.0 0.0 4.80 Vp
42.9714 143.0648 0.0 0.0 4.80 Vp
43.0429 142.9904 0.0 0.0 4.80 Vp
43.1145 142.9159 0.0 0.0 4.80 Vp
43.1860 142.8411 0.0 0.0 4.80 Vp
43.2575 142.7662 0.0 0.0 4.80 Vp
43.3289 142.6911 0.0 0.0 4.80 Vp
43.4002 142.6158 0.0 0.0 4.80 Vp
43.4715 142.5404 0.0 0.0 4.80 Vp
43.5428 142.4648 0.0 0.0 4.80 Vp
43.6140 142.3890 0.0 0.0 4.80 Vp
43.6851 142.3130 0.0 0.0 4.80 Vp
42.2797 143.8481 0.0 0.0 4.80 Vp
42.3518 143.7754 0.0 0.0 4.80 Vp
42.4238 143.7026 0.0 0.0 4.80 Vp
42.4958 143.6296 0.0 0.0 4.80 Vp
42.5677 143.5564 0.0 0.0 4.80 Vp
42.6397 143.4831 0.0 0.0 4.80 Vp
42.7115 143.4096 0.0 0.0 4.80 Vp
42.7833 143.3359 0.0 0.0 4.80 Vp
42.8551 143.2620 0.0 0.0 4.80 Vp
42.9268 143.1880 0.0 0.0 4.80 Vp
42.9985 143.1138 0.0 0.0 4.80 Vp
43.0702 143.0394 0.0 0.0 4.80 Vp
43.1417 142.9649 0.0 0.0 4.80 Vp
43.2133 142.8902 0.0 0.0 4.80 Vp
43.2848 142.8153 0.0 0.0 4.80 Vp
43.3562 142.7402 0.0 0.0 4.80 Vp
43.4276 142.6649 0.0 0.0 4.80 Vp
43.4989 142.5895 0.0 0.0 4.80 Vp
43.5702 142.5139 0.0 0.0 4.80 Vp
43.6414 142.4381 0.0 0.0 4.80 Vp
43.7126 142.3622 0.0 0.0 4.80 Vp
42.3065 143.8968 0.0 0.0 4.80 Vp
42.3786 143.8242 0.0 0.0 4.80 Vp
42.4507 143.7514 0.0 0.0 4.80 Vp
42.5227 143.6784 0.0 0.0 4.80 Vp
42.5947 143.6053 0.0 0.0 4.80 Vp
42.6667 143.5320 0.0 0.0 4.80 Vp
42.7386 143.4585 0.0 0.0 4.80 Vp
42.8104 143.3848 0.0 0.0 4.80 Vp
42.8822 143.3110 0.0 0.0 4.80 Vp
42.9540 143.2370 0.0 0.0 4.80 Vp
43.0257 143.1628 0.0 0.0 4.80 Vp
43.0973 143.0885 0.0 0.0 4.80 Vp
43.1690 143.0139 0.0 0.0 4.80 Vp
43.2405 142.9392 0.0 0.0 4.80 Vp
43.3120 142.8644 0.0 0.0 4.80 Vp
43.3835 142.7893 0.0 0.0 4.80 Vp
43.4549 142.7141 0.0 0.0 4.80 Vp
43.5263 142.6387 0.0 0.0 4.80 Vp
43.5976 142.5631 0.0 0.0 4.80 Vp
43.6688 142.4874 0.0 0.0 4.80 Vp
43.7400 142.4114 0.0 0.0 4.80 Vp
42.3333 143.9456 0.0 0.0 4.80 Vp
42.4055 143.8730 0.0 0.0 4.80 Vp
42.4776 143.8002 0.0 0.0 4.80 Vp
42.5496 143.7273 0.0 0.0 4.80 Vp
42.6217 143.6542 0.0 0.0 4.80 Vp
42.6936 143.5809 0.0 0.0 4.80 Vp
42.7656 143.5074 0.0 0.0 4.80 Vp
42.8374 143.4338 0.0 0.0 4.80 Vp
42.9093 143.3600 0.0 0.0 4.80 Vp
42.9811 143.2860 0.0 0.0 4.80 Vp
43.0528 143.2119 0.0 0.0 4.80 Vp
43.1245 143.1375 0.0 0.0 4.80 Vp
43.1961 143.0630 0.0 0.0 4.80 Vp
43.2677 142.9884 0.0 0.0 4.80 Vp
43.3393 142.9135 0.0 0.0 4.80 Vp
43.4108 142.8385 0.0 0.0 4.80 Vp
43.4822 142.7633 0.0 0.0 4.80 Vp
43.5536 142.6879 0.0 0.0 4.80 Vp
43.6250 142.6124 0.0 0.0 4.80 Vp
43.6963 142.5366 0.0 0.0 4.80 Vp
43.7675 142.4607 0.0 0.0 4.80 Vp
42.3601 143.9944 0.0 0.0 4.80 Vp
42.4323 143.9219 0.0 0.0 4.80 Vp
42.5045 143.8491 0.0 0.0 4.80 Vp
42.5765 143.7762 0.0 0.0 4.80 Vp
42.6486 143.7031 0.0 0.0 4.80 Vp
42.7206 143.6298 0.0 0.0 4.80 Vp
42.7926 143.5564 0.0 0.0 4.80 Vp
42.8645 143.4828 0.0 0.0 4.80 Vp
42.9363 143.4090 0.0 0.0 4.80 Vp
43.0081 143.3351 0.0 0.0 4.80 Vp
43.0799 143.2609 0.0 0.0 4.80 Vp
43.1516 143.1866 0.0 0.0 4.80 Vp
43.2233 143.1122 0.0 0.0 4.80 Vp
43.2949 143.0375 0.0 0.0 4.80 Vp
43.3665 142.9627 0.0 0.0 4.80 Vp
43.4380 142.8877 0.0 0.0 4.80 Vp
43.5095 142.8125 0.0 0.0 4.80 Vp
43.5809 142.7372 0.0 0.0 4.80 Vp
43.6523 142.6616 0.0 0.0 4.80 Vp
43.7236 142.5859 0.0 0.0 4.80 Vp
43.7949 142.5101 0.0 0.0 4.80 Vp
42.3869 144.0433 0.0 0.0 4.80 Vp
42.4591 143.9708 0.0 0.0 4.80 Vp
42.5313 143.8980 0.0 0.0 4.80 Vp
42.6034 143.8251 0.0 0.0 4.80 Vp
42.6755 143.7521 0.0 0.0 4.80 Vp
42.7475 143.6788 0.0 0.0 4.80 Vp
42.8195 143.6054 0.0 0.0 4.80 Vp
42.8915 143.5318 0.0 0.0 4.80 Vp
42.9634 143.4581 0.0 0.0 4.80 Vp
43.0352 143.3842 0.0 0.0 4.80 Vp
43.1070 143.3101 0.0 0.0 4.80 Vp
43.1788 143.2358 0.0 0.0 4.80 Vp
43.2505 143.1614 0.0 0.0 4.80 Vp
43.3221 143.0867 0.0 0.0 4.80 Vp
43.3937 143.0119 0.0 0.0 4.80 Vp
43.4653 142.9370 0.0 0.0 4.80 Vp
43.5368 142.8618 0.0 0.0 4.80 Vp
43.6083 142.7865 0.0 0.0 4.80 Vp
43.6797 142.7110 0.0 0.0 4.80 Vp
43.7510 142.6353 0.0 0.0 4.80 Vp
43.8223 142.5594 0.0 0.0 4.80 Vp
42.4404 144.1412 0.0 0.0 4.80 Vp
42.5127 144.0687 0.0 0.0 4.80 Vp
42.5849 143.9960 0.0 0.0 4.80 Vp
42.6571 143.9232 0.0 0.0 4.80 Vp
42.7292 143.8502 0.0 0.0 4.80 Vp
42.8013 143.7770 0.0 0.0 4.80 Vp
42.8734 143.7036 0.0 0.0 4.80 Vp
42.9454 143.6301 0.0 0.0 4.80 Vp
43.0173 143.5564 0.0 0.0 4.80 Vp
43.0893 143.4825 0.0 0.0 4.80 Vp
43.1611 143.4085 0.0 0.0 4.80 Vp
43.2329 143.3342 0.0 0.0 4.80 Vp
43.3047 143.2598 0.0 0.0 4.80 Vp
43.3764 143.1853 0.0 0.0 4.80 Vp
43.4481 143.1105 0.0 0.0 4.80 Vp
43.5197 143.0356 0.0 0.0 4.80 Vp
43.5913 142.9605 0.0 0.0 4.80 Vp
43.6628 142.8852 0.0 0.0 4.80 Vp
43.7343 142.8098 0.0 0.0 4.80 Vp
43.8057 142.7341 0.0 0.0 4.80 Vp
43.8770 142.6583 0.0 0.0 4.80 Vp
42.4938 144.2392 0.0 0.0 4.80 Vp
42.5662 144.1667 0.0 0.0 4.80 Vp
42.6385 144.0941 0.0 0.0 4.80 Vp
42.7107 144.0213 0.0 0.0 4.80 Vp
42.7829 143.9484 0.0 0.0 4.80 Vp
42.8551 143.8753 0.0 0.0 4.80 Vp
42.9272 143.8020 0.0 0.0 4.80 Vp
42.9992 143.7285 0.0 0.0 4.80 Vp
43.0712 143.6548 0.0 0.0 4.80 Vp
43.1432 143.5810 0.0 0.0 4.80 Vp
43.2151 143.5070 0.0 0.0 4.80 Vp
43.2870 143.4329 0.0 0.0 4.80 Vp
43.3589 143.3585 0.0 0.0 4.80 Vp
43.4306 143.2840 0.0 0.0 4.80 Vp
43.5024 143.2093 0.0 0.0 4.80 Vp
43.5741 143.1344 0.0 0.0 4.80 Vp
43.6457 143.0594 0.0 0.0 4.80 Vp
43.7173 142.9841 0.0 0.0 4.80 Vp
43.7888 142.9087 0.0 0.0 4.80 Vp
43.8603 142.8331 0.0 0.0 4.80 Vp
43.9317 142.7574 0.0 0.0 4.80 Vp
42.5472 144.3373 0.0 0.0 4.80 Vp
42.6196 144.2650 0.0 0.0 4.80 Vp
42.6919 144.1924 0.0 0.0 4.80 Vp
42.7642 144.1197 0.0 0.0 4.80 Vp
42.8365 144.0468 0.0 0.0 4.80 Vp
42.9087 143.9737 0.0 0.0 4.80 Vp
42.9809 143.9005 0.0 0.0 4.80 Vp
43.0530 143.8271 0.0 0.0 4.80 Vp
43.1251 143.7534 0.0 0.0 4.80 Vp
43.1971 143.6797 0.0 0.0 4.80 Vp
43.2691 143.6057 0.0 0.0 4.80 Vp
43.3410 143.5316 0.0 0.0 4.80 Vp
43.4129 143.4573 0.0 0.0 4.80 Vp
43.4848 143.3829 0.0 0.0 4.80 Vp
43.5565 143.3082 0.0 0.0 4.80 Vp
43.6283 143.2334 0.0 0.0 4.80 Vp
43.7000 143.1584 0.0 0.0 4.80 Vp
43.7716 143.0832 0.0 0.0 4.80 Vp
43.8432 143.0079 0.0 0.0 4.80 Vp
43.9148 142.9323 0.0 0.0 4.80 Vp
43.9862 142.8566 0.0 0.0 4.80 Vp
42.6004 144.4357 0.0 0.0 4.80 Vp
42.6729 144.3634 0.0 0.0 4.80 Vp
42.7453 144.2909 0.0 0.0 4.80 Vp
42.8176 144.2182 0.0 0.0 4.80 Vp
42.8899 144.1454 0.0 0.0 4.80 Vp
42.9622 144.0723 0.0 0.0 4.80 Vp
43.0345 143.9991 0.0 0.0 4.80 Vp
43.1066 143.9258 0.0 0.0 4.80 Vp
43.1788 143.8522 0.0 0.0 4.80 Vp
43.2509 143.7785 0.0 0.0 4.80 Vp
43.3229 143.7046 0.0 0.0 4.80 Vp
43.3949 143.6306 0.0 0.0 4.80 Vp
43.4669 143.5564 0.0 0.0 4.80 Vp
43.5388 143.4819 0.0 0.0 4.80 Vp
43.6106 143.4073 0.0 0.0 4.80 Vp
43.6825 143.3326 0.0 0.0 4.80 Vp
43.7542 143.2576 0.0 0.0 4.80 Vp
43.8259 143.1825 0.0 0.0 4.80 Vp
43.8976 143.1072 0.0 0.0 4.80 Vp
43.9692 143.0317 0.0 0.0 4.80 Vp
44.0407 142.9561 0.0 0.0 4.80 Vp
42.6535 144.5342 0.0 0.0 4.80 Vp
42.7261 144.4619 0.0 0.0 4.80 Vp
42.7985 144.3895 0.0 0.0 4.80 Vp
42.8710 144.3169 0.0 0.0 4.80 Vp
42.9433 144.2441 0.0 0.0 4.80 Vp
43.0157 144.1711 0.0 0.0 4.80 Vp
43.0880 144.0980 0.0 0.0 4.80 Vp
43.1602 144.0247 0.0 0.0 4.80 Vp
43.2324 143.9512 0.0 0.0 4.80 Vp
43.3046 143.8775 0.0 0.0 4.80 Vp
43.3767 143.8037 0.0 0.0 4.80 Vp
43.4488 143.7297 0.0 0.0 4.80 Vp
43.5208 143.6555 0.0 0.0 4.80 Vp
43.5927 143.5811 0.0 0.0 4.80 Vp
43.6647 143.5066 0.0 0.0 4.80 Vp
43.7365 143.4319 0.0 0.0 4.80 Vp
43.8083 143.3570 0.0 0.0 4.80 Vp
43.8801 143.2819 0.0 0.0 4.80 Vp
43.9518 143.2067 0.0 0.0 4.80 Vp
44.0235 143.1312 0.0 0.0 4.80 Vp
44.0951 143.0556 0.0 0.0 4.80 Vp
41.0218 141.6494 5.0 0.0 5.82 Vp
41.0925 141.5757 5.0 0.0 5.84 Vp
41.1632 141.5018 5.0 0.0 5.89 Vp
41.2338 141.4277 5.0 0.0 5.88 Vp
41.3044 141.3534 5.0 64.7 6.05 Vp
41.3749 141.2790 5.0 7.5 6.39 Vp
41.4454 141.2044 5.0 0.0 6.11 Vp
41.5158 141.1297 5.0 0.0 5.87 Vp
41.5862 141.0548 5.0 0.0 5.79 Vp
41.6565 140.9797 5.0 0.0 5.70 Vp
41.7268 140.9045 5.0 0.0 5.82 Vp
41.7970 140.8291 5.0 0.0 5.47 Vp
41.8672 140.7535 5.0 0.0 5.52 Vp
41.9374 140.6778 5.0 0.0 5.34 Vp
42.0074 140.6019 5.0 5.7 5.65 Vp
42.0775 140.5259 5.0 0.0 5.67 Vp
42.1475 140.4496 5.0 0.0 5.78 Vp
42.2174 140.3732 5.0 0.0 5.73 Vp
42.2873 140.2967 5.0 0.0 5.62 Vp
42.3571 140.2200 5.0 0.0 5.50 Vp
42.4268 140.1431 5.0 0.0 5.70 Vp
41.0773 141.7433 5.0 0.0 5.82 Vp
41.1481 141.6696 5.0 0.0 5.82 Vp
41.2188 141.5957 5.0 0.0 5.82 Vp
41.2895 141.5216 5.0 0.0 6.03 Vp
41.3601 141.4474 5.0 2435.0 5.90 Vp
41.4307 141.3730 5.0 1197.1 6.34 Vp
41.5013 141.2985 5.0 11.3 6.09 Vp
41.5718 141.2238 5.0 2.8 5.87 Vp
41.6422 141.1489 5.0 0.2 5.97 Vp
41.7126 141.0739 5.0 0.2 6.13 Vp
41.7830 140.9987 5.0 5.3 6.22 Vp
41.8533 140.9233 5.0 244.3 5.82 Vp
41.9235 140.8478 5.0 11.0 5.96 Vp
41.9937 140.7721 5.0 1.1 5.68 Vp
42.0639 140.6963 5.0 28.2 5.86 Vp
42.1339 140.6202 5.0 1.1 5.77 Vp
42.2040 140.5440 5.0 0.0 5.75 Vp
42.2740 140.4677 5.0 0.0 5.68 Vp
42.3439 140.3912 5.0 0.0 5.51 Vp
42.4138 140.3145 5.0 0.0 5.73 Vp
42.4836 140.2376 5.0 0.0 5.80 Vp
41.1328 141.8373 5.0 0.0 5.82 Vp
41.2036 141.7636 5.0 0.0 5.82 Vp
41.2744 141.6897 5.0 0.0 5.82 Vp
41.3451 141.6157 5.0 0.0 6.41 Vp
41.4158 141.5416 5.0 254.4 5.86 Vp
41.4865 141.4672 5.0 43.8 5.98 Vp
41.5571 141.3927 5.0 0.1 5.93 Vp
41.6277 141.3181 5.0 0.0 5.82 Vp
41.6982 141.2432 5.0 0.0 6.08 Vp
41.7686 141.1682 5.0 0.1 5.87 Vp
41.8390 141.0931 5.0 3650.5 6.40 Vp
41.9094 141.0177 5.0 10037.5 6.28 Vp
41.9797 140.9422 5.0 161.9 6.33 Vp
42.0500 140.8666 5.0 21.4 6.23 Vp
42.1202 140.7908 5.0 0.5 5.99 Vp
42.1904 140.7148 5.0 0.0 5.82 Vp
42.2605 140.6386 5.0 0.0 5.82 Vp
42.3305 140.5623 5.0 0.0 5.82 Vp
42.4005 140.4858 5.0 0.0 5.82 Vp
42.4705 140.4091 5.0 0.0 5.81 Vp
42.5404 140.3323 5.0 0.0 6.01 Vp
41.1882 141.9315 5.0 0.0 5.82 Vp
41.2591 141.8578 5.0 0.0 5.82 Vp
41.3299 141.7840 5.0 0.0 5.82 Vp
41.4007 141.7100 5.0 0.0 5.82 Vp
41.4715 141.6359 5.0 0.0 5.82 Vp
41.5422 141.5616 5.0 0.0 5.82 Vp
41.6129 141.4871 5.0 0.0 5.82 Vp
41.6835 141.4125 5.0 0.0 5.82 Vp
41.7540 141.3377 5.0 0.0 5.82 Vp
41.8246 141.2627 5.0 0.0 5.82 Vp
41.8950 141.1876 5.0 737.7 6.28 Vp
41.9655 141.1123 5.0 1956.3 6.48 Vp
42.0359 141.0369 5.0 92.7 6.20 Vp
42.1062 140.9612 5.0 136.2 5.90 Vp
42.1765 140.8854 5.0 47.0 6.00 Vp
42.2467 140.8095 5.0 3.0 5.91 Vp
42.3169 140.7334 5.0 0.0 5.85 Vp
42.3870 140.6571 5.0 0.0 5.83 Vp
42.4570 140.5806 5.0 0.0 5.97 Vp
42.5271 140.5040 5.0 0.0 6.07 Vp
42.5970 140.4272 5.0 0.0 6.03 Vp
41.2435 142.0258 5.0 0.0 5.82 Vp
41.3144 141.9522 5.0 0.0 5.82 Vp
41.3853 141.8784 5.0 0.0 5.82 Vp
41.4562 141.8045 5.0 0.0 5.82 Vp
41.5270 141.7304 5.0 0.0 5.82 Vp
41.5978 141.6561 5.0 0.0 5.82 Vp
41.6685 141.5817 5.0 0.0 5.82 Vp
41.7392 141.5071 5.0 0.0 5.82 Vp
41.8099 141.4323 5.0 0.0 5.82 Vp
41.8804 141.3574 5.0 0.0 5.82 Vp
41.9510 141.2823 5.0 0.0 6.03 Vp
42.0215 141.2071 5.0 0.0 6.18 Vp
42.0919 141.1317 5.0 1.8 5.83 Vp
42.1623 141.0561 5.0 32.4 5.88 Vp
42.2326 140.9803 5.0 117.6 6.01 Vp
42.3029 140.9044 5.0 70.4 6.02 Vp
42.3732 140.8283 5.0 29.8 5.92 Vp
42.4434 140.7520 5.0 4.5 5.95 Vp
42.5135 140.6756 5.0 0.0 5.90 Vp
42.5836 140.5990 5.0 0.0 6.04 Vp
42.6536 140.5222 5.0 0.0 5.79 Vp
41.2987 142.1203 5.0 0.0 5.82 Vp
41.3697 142.0467 5.0 0.0 5.82 Vp
41.4407 141.9730 5.0 0.0 5.82 Vp
41.5116 141.8991 5.0 0.0 5.82 Vp
41.5825 141.8250 5.0 0.0 5.82 Vp
41.6533 141.7508 5.0 0.0 5.82 Vp
41.7241 141.6764 5.0 0.0 5.82 Vp
41.7949 141.6019 5.0 0.0 5.82 Vp
41.8656 141.5271 5.0 0.0 5.82 Vp
41.9362 141.4523 5.0 0.0 5.82 Vp
42.0068 141.3772 5.0 0.0 5.82 Vp
42.0774 141.3020 5.0 0.0 5.82 Vp
42.1479 141.2266 5.0 0.0 5.82 Vp
42.2184 141.1510 5.0 1.0 5.84 Vp
42.2888 141.0753 5.0 36.3 6.07 Vp
42.3591 140.9995 5.0 824.9 6.17 Vp
42.4294 140.9234 5.0 386.0 5.98 Vp
42.4997 140.8472 5.0 167.3 6.10 Vp
42.5699 140.7708 5.0 19.0 5.86 Vp
42.6400 140.6942 5.0 0.0 5.85 Vp
42.7101 140.6175 5.0 0.0 5.65 Vp
41.3538 142.2149 5.0 0.0 5.82 Vp
41.4249 142.1414 5.0 0.0 5.82 Vp
41.4960 142.0677 5.0 0.0 5.82 Vp
41.5670 141.9939 5.0 0.0 5.82 Vp
41.6379 141.9199 5.0 0.0 5.82 Vp
41.7088 141.8457 5.0 0.0 5.82 Vp
41.7797 141.7713 5.0 0.0 5.82 Vp
41.8505 141.6968 5.0 0.0 5.82 Vp
41.9212 141.6221 5.0 0.0 5.82 Vp
41.9920 141.5473 5.0 0.0 5.82 Vp
42.0626 141.4723 5.0 0.0 5.82 Vp
42.1332 141.3971 5.0 0.0 5.82 Vp
42.2038 141.3217 5.0 0.0 5.82 Vp
42.2743 141.2462 5.0 0.1 5.82 Vp
42.3448 141.1705 5.0 14.1 6.15 Vp
42.4152 141.0947 5.0 4098.6 6.54 Vp
42.4856 141.0187 5.0 4441.9 6.77 Vp
42.5559 140.9425 5.0 157.5 6.26 Vp
42.6262 140.8661 5.0 20.1 5.87 Vp
42.6964 140.7896 5.0 0.0 5.75 Vp
42.7665 140.7129 5.0 0.0 5.67 Vp
41.4089 142.3098 5.0 0.0 5.82 Vp
41.4801 142.2363 5.0 0.0 5.82 Vp
41.5512 142.1626 5.0 0.0 5.82 Vp
41.6222 142.0888 5.0 0.0 5.82 Vp
41.6932 142.0148 5.0 0.0 5.82 Vp
41.7642 141.9407 5.0 0.0 5.82 Vp
41.8351 141.8664 5.0 0.0 5.82 Vp
41.9060 141.7919 5.0 0.0 5.82 Vp
41.9768 141.7173 5.0 0.0 5.82 Vp
42.0476 141.6425 5.0 0.0 5.82 Vp
42.1183 141.5675 5.0 0.0 5.82 Vp
42.1890 141.4924 5.0 0.0 5.82 Vp
42.2597 141.4171 5.0 0.0 5.82 Vp
42.3302 141.3416 5.0 0.0 5.82 Vp
42.4008 141.2659 5.0 3.9 6.05 Vp
42.4712 141.1901 5.0 734.1 6.68 Vp
42.5417 141.1141 5.0 682.5 5.90 Vp
42.6121 141.0380 5.0 928.9 6.08 Vp
42.6824 140.9617 5.0 307.7 5.95 Vp
42.7526 140.8851 5.0 193.3 5.75 Vp
42.8229 140.8085 5.0 0.0 5.78 Vp
41.4639 142.4048 5.0 0.0 5.82 Vp
41.5351 142.3313 5.0 0.0 5.82 Vp
41.6063 142.2577 5.0 0.0 5.82 Vp
41.6774 142.1839 5.0 0.0 5.82 Vp
41.7485 142.1100 5.0 0.0 5.82 Vp
41.8195 142.0359 5.0 0.0 5.82 Vp
41.8905 141.9616 5.0 0.0 5.82 Vp
41.9614 141.8872 5.0 0.0 5.82 Vp
42.0323 141.8126 5.0 0.0 5.82 Vp
42.1032 141.7378 5.0 0.0 5.82 Vp
42.1740 141.6629 5.0 0.0 5.82 Vp
42.2447 141.5878 5.0 0.0 5.82 Vp
42.3154 141.5125 5.0 0.0 5.82 Vp
42.3861 141.4371 5.0 0.0 5.72 Vp
42.4567 141.3615 5.0 71.3 5.66 Vp
42.5272 141.2857 5.0 520.4 5.78 Vp
42.5977 141.2097 5.0 91.1 5.60 Vp
42.6681 141.1336 5.0 1037.4 6.10 Vp
42.7385 141.0574 5.0 1212.5 6.16 Vp
42.8089 140.9809 5.0 771.6 5.88 Vp
42.8791 140.9043 5.0 0.0 6.09 Vp
41.5188 142.4999 5.0 0.0 5.82 Vp
41.5901 142.4265 5.0 0.0 5.82 Vp
41.6613 142.3530 5.0 0.0 5.82 Vp
41.7325 142.2792 5.0 0.0 5.82 Vp
41.8037 142.2053 5.0 0.0 5.82 Vp
41.8748 142.1313 5.0 0.0 5.82 Vp
41.9458 142.0571 5.0 0.0 5.82 Vp
42.0168 141.9827 5.0 0.0 5.82 Vp
42.0878 141.9081 5.0 0.0 5.82 Vp
42.1587 141.8334 5.0 0.0 5.82 Vp
42.2295 141.7585 5.0 0.0 5.82 Vp
42.3003 141.6834 5.0 0.0 5.82 Vp
42.3711 141.6082 5.0 0.0 5.82 Vp
42.4418 141.5328 5.0 0.0 5.70 Vp
42.5125 141.4572 5.0 316.4 5.24 Vp
42.5831 141.3815 5.0 1362.5 5.63 Vp
42.6536 141.3056 5.0 11.9 5.57 Vp
42.7241 141.2295 5.0 79.8 6.05 Vp
42.7946 141.1532 5.0 82.6 6.24 Vp
42.8650 141.0768 5.0 25.9 6.12 Vp
42.9353 141.0002 5.0 0.0 5.96 Vp
41.5737 142.5952 5.0 0.0 5.82 Vp
41.6450 142.5219 5.0 0.0 5.82 Vp
41.7163 142.4484 5.0 0.0 5.82 Vp
41.7876 142.3747 5.0 0.0 5.82 Vp
41.8588 142.3008 5.0 0.0 5.82 Vp
41.9299 142.2268 5.0 0.0 5.82 Vp
42.0010 142.1526 5.0 0.0 5.82 Vp
42.0721 142.0783 5.0 0.0 5.82 Vp
42.1431 142.0038 5.0 0.0 5.82 Vp
42.2141 141.9291 5.0 0.0 5.82 Vp
42.2850 141.8542 5.0 0.0 5.82 Vp
42.3559 141.7792 5.0 1.3 5.82 Vp
42.4267 141.7040 5.0 0.0 5.82 Vp
42.4975 141.6286 5.0 0.5 5.83 Vp
42.5682 141.5531 5.0 10.2 5.75 Vp
42.6389 141.4774 5.0 63.1 5.78 Vp
42.7095 141.4015 5.0 55.6 5.65 Vp
42.7801 141.3255 5.0 86.9 5.81 Vp
42.8506 141.2493 5.0 48.2 5.88 Vp
42.9210 141.1729 5.0 11.7 5.87 Vp
42.9914 141.0964 5.0 0.0 5.93 Vp
41.6285 142.6907 5.0 0.0 5.82 Vp
41.6999 142.6174 5.0 0.0 5.82 Vp
41.7712 142.5439 5.0 0.0 5.82 Vp
41.8425 142.4703 5.0 0.0 5.82 Vp
41.9138 142.3965 5.0 0.0 5.82 Vp
41.9850 142.3225 5.0 0.0 5.82 Vp
42.0562 142.2484 5.0 0.0 5.82 Vp
42.1273 142.1741 5.0 0.0 5.82 Vp
42.1984 142.0996 5.0 0.0 5.82 Vp
42.2694 142.0249 5.0 0.0 5.82 Vp
42.3404 141.9501 5.0 3.3 5.82 Vp
42.4113 141.8752 5.0 5.2 5.82 Vp
42.4822 141.8000 5.0 0.0 5.82 Vp
42.5531 141.7247 5.0 7.7 5.73 Vp
42.6238 141.6492 5.0 1.6 5.11 Vp
42.6946 141.5735 5.0 4.4 5.47 Vp
42.7653 141.4977 5.0 1369.3 5.47 Vp
42.8359 141.4217 5.0 3566.4 5.65 Vp
42.9065 141.3455 5.0 57.6 5.87 Vp
42.9770 141.2692 5.0 5.8 6.10 Vp
43.0475 141.1927 5.0 0.0 5.98 Vp
41.6831 142.7864 5.0 0.0 5.82 Vp
41.7546 142.7131 5.0 0.0 5.82 Vp
41.8260 142.6397 5.0 0.0 5.82 Vp
41.8974 142.5661 5.0 0.0 5.82 Vp
41.9687 142.4923 5.0 0.0 5.82 Vp
42.0400 142.4184 5.0 0.0 5.82 Vp
42.1112 142.3443 5.0 0.0 5.82 Vp
42.1824 142.2700 5.0 10.9 5.72 Vp
42.2536 142.1956 5.0 15.8 5.52 Vp
42.3247 142.1210 5.0 8.2 5.55 Vp
42.3957 142.0462 5.0 107.8 4.53 Vp
42.4667 141.9713 5.0 797.1 4.75 Vp
42.5377 141.8962 5.0 213.9 5.00 Vp
42.6086 141.8209 5.0 2609.9 4.65 Vp
42.6794 141.7454 5.0 150.1 4.61 Vp
42.7502 141.6698 5.0 5.0 5.07 Vp
42.8210 141.5940 5.0 809.1 4.69 Vp
42.8917 141.5181 5.0 1280.2 5.00 Vp
42.9623 141.4419 5.0 1206.4 5.82 Vp
43.0329 141.3656 5.0 6.4 5.57 Vp
43.1034 141.2891 5.0 0.0 5.79 Vp
41.7378 142.8822 5.0 0.0 5.82 Vp
41.8093 142.8090 5.0 0.0 5.82 Vp
41.8808 142.7356 5.0 0.0 5.82 Vp
41.9522 142.6620 5.0 0.0 5.82 Vp
42.0236 142.5883 5.0 0.0 5.82 Vp
42.0949 142.5144 5.0 0.0 5.72 Vp
42.1662 142.4404 5.0 0.2 5.47 Vp
42.2375 142.3661 5.0 72.5 4.61 Vp
42.3087 142.2918 5.0 130.5 3.63 Vp
42.3798 142.2172 5.0 49.5 4.37 Vp
42.4510 142.1425 5.0 527.2 4.84 Vp
42.5220 142.0676 5.0 2270.6 4.55 Vp
42.5930 141.9925 5.0 351.9 4.31 Vp
42.6640 141.9173 5.0 2952.8 4.21 Vp
42.7349 141.8419 5.0 313.9 4.63 Vp
42.8058 141.7663 5.0 79.7 4.59 Vp
42.8766 141.6905 5.0 1876.8 4.44 Vp
42.9473 141.6146 5.0 516.0 4.66 Vp
43.0180 141.5385 5.0 312.3 5.01 Vp
43.0887 141.4622 5.0 2.4 5.14 Vp
43.1593 141.3858 5.0 0.0 5.53 Vp
41.7650 142.9301 5.0 0.0 5.82 Vp
41.8366 142.8569 5.0 0.0 5.82 Vp
41.9081 142.7836 5.0 0.0 5.82 Vp
41.9796 142.7101 5.0 0.0 5.82 Vp
42.0510 142.6364 5.0 0.0 5.82 Vp
42.1224 142.5625 5.0 0.0 5.67 Vp
42.1937 142.4885 5.0 1.4 5.47 Vp
42.2650 142.4143 5.0 199.7 4.44 Vp
42.3362 142.3399 5.0 1438.6 3.60 Vp
42.4074 142.2654 5.0 153.8 3.94 Vp
42.4786 142.1907 5.0 334.4 4.20 Vp
42.5496 142.1158 5.0 423.4 4.36 Vp
42.6207 142.0408 5.0 176.0 4.24 Vp
42.6917 141.9655 5.0 79.8 4.52 Vp
42.7626 141.8902 5.0 56.3 4.65 Vp
42.8335 141.8146 5.0 889.1 4.41 Vp
42.9044 141.7388 5.0 164.0 4.61 Vp
42.9752 141.6629 5.0 12.8 5.01 Vp
43.0459 141.5869 5.0 8.0 4.87 Vp
43.1166 141.5106 5.0 0.3 5.05 Vp
43.1872 141.4342 5.0 0.0 5.36 Vp
41.7923 142.9781 5.0 0.0 5.82 Vp
41.8639 142.9050 5.0 0.0 5.82 Vp
41.9354 142.8316 5.0 0.0 5.82 Vp
42.0069 142.7581 5.0 18.9 5.82 Vp
42.0784 142.6845 5.0 21.4 5.82 Vp
42.1498 142.6106 5.0 4.1 5.59 Vp
42.2211 142.5366 5.0 154.5 5.30 Vp
42.2925 142.4624 5.0 342.5 4.13 Vp
42.3637 142.3881 5.0 1679.3 4.15 Vp
42.4349 142.3136 5.0 85.2 3.86 Vp
42.5061 142.2389 5.0 174.9 4.24 Vp
42.5772 142.1640 5.0 264.0 4.21 Vp
42.6483 142.0890 5.0 230.4 4.09 Vp
42.7193 142.0138 5.0 29.8 4.39 Vp
42.7903 141.9385 5.0 290.8 5.22 Vp
42.8613 141.8629 5.0 1702.5 4.58 Vp
42.9321 141.7872 5.0 183.0 4.58 Vp
43.0029 141.7113 5.0 21.1 5.08 Vp
43.0737 141.6353 5.0 10.3 4.97 Vp
43.1444 141.5591 5.0 0.3 5.04 Vp
43.2151 141.4827 5.0 0.0 5.49 Vp
41.8195 143.0262 5.0 0.0 5.82 Vp
41.8911 142.9530 5.0 0.0 5.75 Vp
41.9627 142.8797 5.0 0.0 5.76 Vp
42.0342 142.8063 5.0 96.1 4.85 Vp
42.1057 142.7326 5.0 108.4 4.53 Vp
42.1772 142.6588 5.0 114.8 5.15 Vp
42.2486 142.5848 5.0 3308.2 5.32 Vp
42.3199 142.5107 5.0 1095.0 4.19 Vp
42.3912 142.4363 5.0 289.7 4.27 Vp
42.4625 142.3618 5.0 59.9 4.42 Vp
42.5337 142.2872 5.0 87.0 4.06 Vp
42.6048 142.2124 5.0 113.8 4.12 Vp
42.6759 142.1373 5.0 119.9 4.47 Vp
42.7470 142.0622 5.0 249.8 4.32 Vp
42.8180 141.9868 5.0 315.4 4.95 Vp
42.8890 141.9113 5.0 347.6 4.62 Vp
42.9599 141.8356 5.0 93.5 4.55 Vp
43.0307 141.7598 5.0 240.8 4.48 Vp
43.1015 141.6837 5.0 9.7 4.95 Vp
43.1723 141.6075 5.0 0.5 5.06 Vp
43.2430 141.5311 5.0 0.0 5.36 Vp
41.8467 143.0743 5.0 0.0 5.72 Vp
41.9184 143.0012 5.0 0.0 5.77 Vp
41.9900 142.9279 5.0 0.0 5.79 Vp
42.0616 142.8544 5.0 115.1 4.32 Vp
42.1331 142.7808 5.0 155.7 4.09 Vp
42.2045 142.7070 5.0 860.2 4.57 Vp
42.2760 142.6330 5.0 5664.8 5.85 Vp
42.3473 142.5589 5.0 2655.5 5.55 Vp
42.4187 142.4846 5.0 1941.3 5.58 Vp
42.4900 142.4101 5.0 258.9 4.12 Vp
42.5612 142.3355 5.0 1043.5 4.23 Vp
42.6324 142.2607 5.0 851.3 4.32 Vp
42.7035 142.1857 5.0 952.0 4.14 Vp
42.7746 142.1105 5.0 276.7 4.65 Vp
42.8457 142.0352 5.0 222.7 4.76 Vp
42.9166 141.9597 5.0 98.2 4.84 Vp
42.9876 141.8841 5.0 326.7 4.48 Vp
43.0585 141.8082 5.0 1722.7 4.25 Vp
43.1293 141.7322 5.0 8.4 4.98 Vp
43.2001 141.6560 5.0 0.8 5.07 Vp
43.2708 141.5797 5.0 0.0 5.51 Vp
41.8739 143.1224 5.0 0.0 5.71 Vp
41.9456 143.0493 5.0 1.3 5.47 Vp
42.0173 142.9760 5.0 0.7 5.43 Vp
42.0888 142.9026 5.0 438.6 4.33 Vp
42.1604 142.8290 5.0 461.4 3.89 Vp
42.2319 142.7553 5.0 2486.6 4.81 Vp
42.3034 142.6813 5.0 4682.8 5.62 Vp
42.3748 142.6072 5.0 1725.1 5.54 Vp
42.4461 142.5329 5.0 3163.9 5.78 Vp
42.5174 142.4585 5.0 1020.9 4.98 Vp
42.5887 142.3839 5.0 4823.8 5.08 Vp
42.6599 142.3091 5.0 2003.1 4.25 Vp
42.7311 142.2341 5.0 1469.9 4.81 Vp
42.8022 142.1590 5.0 725.6 4.70 Vp
42.8733 142.0837 5.0 1180.0 5.34 Vp
42.9443 142.0082 5.0 1023.9 5.41 Vp
43.0153 141.9326 5.0 532.4 4.64 Vp
43.0862 141.8568 5.0 415.2 4.85 Vp
43.1571 141.7808 5.0 16.6 5.06 Vp
43.2279 141.7046 5.0 1.1 5.17 Vp
43.2986 141.6283 5.0 0.0 5.31 Vp
41.9011 143.1706 5.0 0.0 5.62 Vp
41.9728 143.0975 5.0 617.4 5.61 Vp
42.0445 143.0243 5.0 322.1 5.39 Vp
42.1161 142.9509 5.0 1984.5 4.39 Vp
42.1877 142.8773 5.0 1605.4 4.42 Vp
42.2592 142.8035 5.0 3707.1 5.10 Vp
42.3307 142.7296 5.0 5403.1 5.55 Vp
42.4022 142.6555 5.0 1017.8 6.10 Vp
42.4736 142.5813 5.0 775.3 5.16 Vp
42.5449 142.5069 5.0 962.1 5.56 Vp
42.6162 142.4323 5.0 1084.1 4.92 Vp
42.6875 142.3575 5.0 1011.3 4.40 Vp
42.7587 142.2826 5.0 396.8 4.57 Vp
42.8298 142.2075 5.0 1079.9 4.94 Vp
42.9009 142.1322 5.0 1369.3 5.07 Vp
42.9720 142.0567 5.0 1494.1 5.49 Vp
43.0430 141.9811 5.0 464.6 5.00 Vp
43.1139 141.9053 5.0 65.3 4.84 Vp
43.1848 141.8293 5.0 110.6 5.04 Vp
43.2556 141.7532 5.0 0.7 5.18 Vp
43.3264 141.6769 5.0 0.0 5.39 Vp
41.9283 143.2188 5.0 0.0 5.53 Vp
42.0000 143.1458 5.0 3726.8 5.45 Vp
42.0717 143.0725 5.0 2102.0 5.54 Vp
42.1434 142.9991 5.0 371.8 5.03 Vp
42.2150 142.9256 5.0 3240.5 5.97 Vp
42.2865 142.8519 5.0 2306.7 5.76 Vp
42.3581 142.7780 5.0 2644.3 5.77 Vp
42.4295 142.7039 5.0 311.4 5.53 Vp
42.5010 142.6297 5.0 512.5 5.45 Vp
42.5723 142.5553 5.0 4205.1 6.47 Vp
42.6437 142.4807 5.0 3781.8 6.66 Vp
42.7150 142.4060 5.0 8691.5 5.83 Vp
42.7862 142.3311 5.0 4295.7 6.42 Vp
42.8574 142.2560 5.0 280.5 4.55 Vp
42.9285 142.1807 5.0 78.9 4.90 Vp
42.9996 142.1053 5.0 315.6 5.31 Vp
43.0706 142.0297 5.0 29.7 4.96 Vp
43.1416 141.9539 5.0 411.8 5.19 Vp
43.2125 141.8779 5.0 2415.6 4.71 Vp
43.2834 141.8018 5.0 0.0 5.32 Vp
43.3542 141.7255 5.0 0.0 5.51 Vp
41.9554 143.2670 5.0 0.0 5.65 Vp
42.0272 143.1940 5.0 1647.1 5.40 Vp
42.0989 143.1208 5.0 995.4 5.58 Vp
42.1706 143.0475 5.0 535.5 6.65 Vp
42.2422 142.9740 5.0 11030.4 7.44 Vp
42.3138 142.9003 5.0 3160.7 6.36 Vp
42.3854 142.8264 5.0 508.0 5.58 Vp
42.4569 142.7523 5.0 69.9 5.67 Vp
42.5283 142.6781 5.0 353.4 5.48 Vp
42.5998 142.6038 5.0 2039.4 6.15 Vp
42.6711 142.5292 5.0 999.7 5.90 Vp
42.7424 142.4545 5.0 2928.1 5.95 Vp
42.8137 142.3796 5.0 3228.5 6.19 Vp
42.8849 142.3045 5.0 106.4 5.31 Vp
42.9561 142.2293 5.0 30.5 5.28 Vp
43.0272 142.1539 5.0 89.8 5.45 Vp
43.0983 142.0783 5.0 31.8 5.64 Vp
43.1693 142.0025 5.0 288.7 4.92 Vp
43.2402 141.9266 5.0 1147.0 4.22 Vp
43.3111 141.8505 5.0 0.0 5.37 Vp
43.3820 141.7742 5.0 0.0 5.59 Vp
41.9825 143.3154 5.0 0.0 5.55 Vp
42.0543 143.2423 5.0 227.6 5.53 Vp
42.1261 143.1692 5.0 279.6 5.74 Vp
42.1978 143.0958 5.0 171.8 6.74 Vp
42.2695 143.0223 5.0 5113.8 5.20 Vp
42.3411 142.9487 5.0 2065.8 4.93 Vp
42.4127 142.8748 5.0 12.5 6.08 Vp
42.4842 142.8008 5.0 3.0 6.04 Vp
42.5557 142.7266 5.0 143.4 5.82 Vp
42.6272 142.6523 5.0 628.6 6.14 Vp
42.6985 142.5777 5.0 329.5 6.10 Vp
42.7699 142.5031 5.0 546.0 5.35 Vp
42.8412 142.4282 5.0 675.7 5.37 Vp
42.9124 142.3531 5.0 318.5 5.73 Vp
42.9836 142.2779 5.0 70.2 5.48 Vp
43.0548 142.2025 5.0 13.7 5.13 Vp
43.1259 142.1270 5.0 28.6 5.76 Vp
43.1969 142.0512 5.0 425.9 6.15 Vp
43.2679 141.9753 5.0 227.1 5.48 Vp
43.3388 141.8992 5.0 0.0 5.43 Vp
43.4097 141.8230 5.0 0.0 5.72 Vp
42.0096 143.3637 5.0 0.0 5.70 Vp
42.0815 143.2907 5.0 355.5 5.81 Vp
42.1532 143.2176 5.0 130.1 5.70 Vp
42.2250 143.1443 5.0 85.7 6.08 Vp
42.2967 143.0708 5.0 2440.8 7.04 Vp
42.3684 142.9971 5.0 1819.9 6.87 Vp
42.4400 142.9233 5.0 36.6 5.79 Vp
42.5115 142.8493 5.0 19.1 6.02 Vp
42.5831 142.7751 5.0 67.0 6.47 Vp
42.6545 142.7008 5.0 652.9 7.20 Vp
42.7260 142.6263 5.0 208.5 6.70 Vp
42.7973 142.5517 5.0 402.6 6.23 Vp
42.8687 142.4768 5.0 2706.1 6.21 Vp
42.9399 142.4018 5.0 651.6 5.75 Vp
43.0112 142.3266 5.0 46.8 5.88 Vp
43.0823 142.2512 5.0 14.8 5.82 Vp
43.1535 142.1757 5.0 28.0 5.59 Vp
43.2245 142.1000 5.0 75.9 5.53 Vp
43.2956 142.0241 5.0 28.6 5.33 Vp
43.3665 141.9480 5.0 0.0 5.60 Vp
43.4374 141.8718 5.0 0.0 5.62 Vp
42.0367 143.4120 5.0 0.0 5.59 Vp
42.1086 143.3391 5.0 90.3 5.82 Vp
42.1804 143.2660 5.0 38.6 5.75 Vp
42.2522 143.1927 5.0 1007.2 5.37 Vp
42.3239 143.1192 5.0 751.5 5.84 Vp
42.3956 143.0456 5.0 1304.7 6.43 Vp
42.4672 142.9718 5.0 158.9 5.87 Vp
42.5388 142.8979 5.0 288.7 6.53 Vp
42.6104 142.8237 5.0 116.6 6.55 Vp
42.6819 142.7494 5.0 320.8 6.69 Vp
42.7533 142.6749 5.0 102.0 6.29 Vp
42.8247 142.6003 5.0 294.6 6.28 Vp
42.8961 142.5255 5.0 734.3 5.57 Vp
42.9674 142.4505 5.0 88.0 5.52 Vp
43.0387 142.3753 5.0 27.1 5.83 Vp
43.1099 142.3000 5.0 22.9 5.82 Vp
43.1810 142.2244 5.0 21.7 5.82 Vp
43.2521 142.1488 5.0 12.8 5.57 Vp
43.3232 142.0729 5.0 9.3 5.62 Vp
43.3942 141.9968 5.0 0.0 5.64 Vp
43.4651 141.9206 5.0 0.0 5.38 Vp
42.0638 143.4605 5.0 0.0 5.82 Vp
42.1357 143.3875 5.0 0.1 5.82 Vp
42.2075 143.3145 5.0 12.7 5.70 Vp
42.2793 143.2412 5.0 4886.8 5.23 Vp
42.3511 143.1678 5.0 743.7 5.45 Vp
42.4228 143.0942 5.0 1288.4 4.68 Vp
42.4945 143.0204 5.0 780.1 5.21 Vp
42.5661 142.9464 5.0 829.9 5.82 Vp
42.6377 142.8723 5.0 339.8 6.23 Vp
42.7092 142.7980 5.0 146.2 6.62 Vp
42.7807 142.7236 5.0 119.5 6.84 Vp
42.8521 142.6490 5.0 160.6 6.51 Vp
42.9235 142.5742 5.0 186.8 5.75 Vp
42.9949 142.4992 5.0 86.6 5.77 Vp
43.0662 142.4240 5.0 29.8 5.62 Vp
43.1374 142.3487 5.0 39.2 5.55 Vp
43.2086 142.2732 5.0 35.2 5.33 Vp
43.2797 142.1976 5.0 14.5 5.57 Vp
43.3508 142.1217 5.0 3.7 5.65 Vp
43.4218 142.0457 5.0 0.0 5.53 Vp
43.4928 141.9695 5.0 0.0 5.41 Vp
42.0908 143.5089 5.0 0.0 5.82 Vp
42.1627 143.4360 5.0 0.0 5.82 Vp
42.2346 143.3630 5.0 10.5 5.74 Vp
42.3064 143.2897 5.0 6619.9 6.01 Vp
42.3782 143.2163 5.0 964.9 5.86 Vp
42.4500 143.1427 5.0 4305.7 5.12 Vp
42.5217 143.0690 5.0 2844.0 6.35 Vp
42.5933 142.9951 5.0 1549.3 5.97 Vp
42.6650 142.9210 5.0 885.0 6.00 Vp
42.7365 142.8467 5.0 730.7 7.15 Vp
42.8080 142.7723 5.0 716.3 7.06 Vp
42.8795 142.6977 5.0 682.6 8.28 Vp
42.9509 142.6229 5.0 548.4 7.07 Vp
43.0223 142.5480 5.0 142.7 6.00 Vp
43.0936 142.4728 5.0 41.2 5.62 Vp
43.1649 142.3976 5.0 108.7 5.46 Vp
43.2361 142.3221 5.0 212.5 5.32 Vp
43.3073 142.2464 5.0 20.6 5.47 Vp
43.3784 142.1706 5.0 1.4 5.36 Vp
43.4495 142.0946 5.0 0.0 5.37 Vp
43.5205 142.0184 5.0 0.0 5.32 Vp
42.1178 143.5574 5.0 0.0 5.82 Vp
42.1898 143.4846 5.0 0.0 5.82 Vp
42.2617 143.4115 5.0 0.3 5.70 Vp
42.3335 143.3383 5.0 243.7 5.93 Vp
42.4054 143.2649 5.0 52.2 5.60 Vp
42.4771 143.1914 5.0 4308.3 6.32 Vp
42.5489 143.1177 5.0 2683.9 6.40 Vp
42.6206 143.0437 5.0 5477.3 5.66 Vp
42.6922 142.9697 5.0 3860.2 5.83 Vp
42.7638 142.8955 5.0 2360.1 6.00 Vp
42.8354 142.8210 5.0 5095.0 6.44 Vp
42.9069 142.7465 5.0 469.8 6.99 Vp
42.9783 142.6717 5.0 1952.3 6.73 Vp
43.0497 142.5968 5.0 1305.3 6.45 Vp
43.1211 142.5217 5.0 279.6 5.90 Vp
43.1924 142.4464 5.0 72.3 5.43 Vp
43.2636 142.3710 5.0 142.7 5.28 Vp
43.3348 142.2953 5.0 164.7 5.35 Vp
43.4060 142.2196 5.0 2.1 5.36 Vp
43.4771 142.1436 5.0 0.0 5.39 Vp
43.5481 142.0674 5.0 0.0 5.32 Vp
42.1448 143.6060 5.0 0.0 5.82 Vp
42.2168 143.5331 5.0 0.0 5.82 Vp
42.2887 143.4601 5.0 0.0 5.78 Vp
42.3606 143.3869 5.0 12.5 5.69 Vp
42.4325 143.3136 5.0 44.3 4.82 Vp
42.5043 143.2400 5.0 196.6 5.24 Vp
42.5761 143.1663 5.0 171.8 5.46 Vp
42.6478 143.0925 5.0 4569.4 6.11 Vp
42.7195 143.0184 5.0 3591.2 5.81 Vp
42.7911 142.9442 5.0 1231.5 5.57 Vp
42.8627 142.8698 5.0 11181.2 6.22 Vp
42.9342 142.7953 5.0 931.0 6.46 Vp
43.0057 142.7206 5.0 1509.7 6.23 Vp
43.0771 142.6456 5.0 2605.8 6.23 Vp
43.1485 142.5706 5.0 3751.6 6.78 Vp
43.2198 142.4953 5.0 172.2 5.65 Vp
43.2911 142.4199 5.0 370.9 5.16 Vp
43.3624 142.3443 5.0 1646.6 6.00 Vp
43.4335 142.2685 5.0 9.1 5.44 Vp
43.5047 142.1926 5.0 0.0 5.43 Vp
43.5757 142.1164 5.0 0.0 5.34 Vp
42.1718 143.6545 5.0 0.0 5.82 Vp
42.2438 143.5817 5.0 0.0 5.82 Vp
42.3158 143.5087 5.0 0.0 5.76 Vp
42.3877 143.4356 5.0 10.8 5.69 Vp
42.4596 143.3622 5.0 71.5 3.59 Vp
42.5314 143.2888 5.0 112.8 4.86 Vp
42.6032 143.2151 5.0 150.5 5.02 Vp
42.6750 143.1412 5.0 240.9 5.03 Vp
42.7467 143.0672 5.0 161.6 4.45 Vp
42.8183 142.9930 5.0 517.6 4.97 Vp
42.8900 142.9187 5.0 3668.4 6.61 Vp
42.9615 142.8441 5.0 1326.3 6.99 Vp
43.0330 142.7694 5.0 1247.9 6.46 Vp
43.1045 142.6945 5.0 1549.9 6.14 Vp
43.1759 142.6195 5.0 2252.1 6.21 Vp
43.2473 142.5443 5.0 179.8 6.01 Vp
43.3186 142.4689 5.0 130.8 5.30 Vp
43.3899 142.3933 5.0 306.4 5.04 Vp
43.4611 142.3175 5.0 90.7 4.97 Vp
43.5322 142.2416 5.0 0.0 5.44 Vp
43.6033 142.1655 5.0 0.0 5.27 Vp
42.1987 143.7032 5.0 0.0 5.82 Vp
42.2708 143.6304 5.0 0.0 5.82 Vp
42.3428 143.5574 5.0 0.0 5.82 Vp
42.4147 143.4843 5.0 19.4 5.82 Vp
42.4867 143.4110 5.0 184.9 3.67 Vp
42.5585 143.3375 5.0 3007.9 6.03 Vp
42.6304 143.2639 5.0 2095.1 5.41 Vp
42.7021 143.1900 5.0 72.6 4.10 Vp
42.7739 143.1160 5.0 116.5 4.23 Vp
42.8456 143.0419 5.0 1553.2 4.53 Vp
42.9172 142.9675 5.0 591.6 4.82 Vp
42.9888 142.8930 5.0 234.5 5.70 Vp
43.0604 142.8184 5.0 990.7 6.40 Vp
43.1319 142.7435 5.0 1030.8 6.50 Vp
43.2033 142.6685 5.0 690.8 6.24 Vp
43.2747 142.5933 5.0 656.5 6.10 Vp
43.3460 142.5179 5.0 1265.6 5.83 Vp
43.4173 142.4423 5.0 414.6 5.25 Vp
43.4886 142.3666 5.0 710.0 4.99 Vp
43.5598 142.2907 5.0 0.0 5.70 Vp
43.6309 142.2146 5.0 0.0 5.69 Vp
42.2256 143.7518 5.0 0.0 5.82 Vp
42.2977 143.6791 5.0 0.0 5.82 Vp
42.3698 143.6061 5.0 0.0 5.82 Vp
42.4418 143.5330 5.0 7.0 5.82 Vp
42.5137 143.4597 5.0 157.6 4.11 Vp
42.5856 143.3863 5.0 8576.6 7.12 Vp
42.6575 143.3127 5.0 6550.2 5.12 Vp
42.7293 143.2389 5.0 282.1 3.40 Vp
42.8011 143.1649 5.0 27.3 4.76 Vp
42.8728 143.0908 5.0 2471.7 5.09 Vp
42.9445 143.0165 5.0 673.8 5.01 Vp
43.0161 142.9420 5.0 103.1 5.30 Vp
43.0877 142.8673 5.0 961.8 5.81 Vp
43.1592 142.7925 5.0 1087.0 5.89 Vp
43.2307 142.7175 5.0 236.5 6.03 Vp
43.3021 142.6423 5.0 608.7 5.89 Vp
43.3735 142.5670 5.0 1416.2 5.91 Vp
43.4448 142.4914 5.0 577.7 5.78 Vp
43.5161 142.4157 5.0 819.0 5.82 Vp
43.5873 142.3398 5.0 0.0 5.73 Vp
43.6584 142.2638 5.0 0.0 5.66 Vp
42.2526 143.8005 5.0 0.0 5.82 Vp
42.3247 143.7278 5.0 0.0 5.82 Vp
42.3967 143.6549 5.0 0.0 5.82 Vp
42.4688 143.5818 5.0 0.0 5.82 Vp
42.5407 143.5085 5.0 15.6 5.82 Vp
42.6127 143.4351 5.0 808.8 3.86 Vp
42.6846 143.3615 5.0 687.0 3.85 Vp
42.7564 143.2878 5.0 348.4 3.52 Vp
42.8282 143.2138 5.0 28.3 4.49 Vp
42.9000 143.1397 5.0 197.0 5.44 Vp
42.9717 143.0654 5.0 140.1 5.00 Vp
43.0433 142.9910 5.0 189.1 4.58 Vp
43.1149 142.9163 5.0 2533.0 5.28 Vp
43.1865 142.8415 5.0 2429.6 6.03 Vp
43.2580 142.7665 5.0 397.9 5.93 Vp
43.3295 142.6914 5.0 447.5 5.82 Vp
43.4009 142.6160 5.0 723.0 5.69 Vp
43.4722 142.5405 5.0 341.0 5.53 Vp
43.5435 142.4649 5.0 17.2 5.71 Vp
43.6148 142.3890 5.0 0.0 5.81 Vp
43.6860 142.3130 5.0 0.0 5.83 Vp
42.2794 143.8493 5.0 0.0 5.82 Vp
42.3516 143.7766 5.0 0.0 5.82 Vp
42.4237 143.7037 5.0 0.0 5.82 Vp
42.4957 143.6306 5.0 0.0 5.82 Vp
42.5677 143.5574 5.0 31.3 5.59 Vp
42.6397 143.4840 5.0 252.9 3.40 Vp
42.7116 143.4104 5.0 15.2 4.90 Vp
42.7835 143.3367 5.0 80.0 4.67 Vp
42.8553 143.2628 5.0 390.2 4.68 Vp
42.9271 143.1887 5.0 20.0 5.74 Vp
42.9989 143.1144 5.0 143.5 4.89 Vp
43.0706 143.0400 5.0 259.3 4.62 Vp
43.1422 142.9654 5.0 3000.5 5.25 Vp
43.2138 142.8906 5.0 5401.1 6.49 Vp
43.2853 142.8156 5.0 643.3 5.88 Vp
43.3568 142.7405 5.0 261.4 5.42 Vp
43.4283 142.6652 5.0 378.7 5.38 Vp
43.4996 142.5897 5.0 1047.2 5.98 Vp
43.5710 142.5141 5.0 0.7 5.81 Vp
43.6423 142.4382 5.0 0.0 5.81 Vp
43.7135 142.3622 5.0 0.0 5.84 Vp
42.3063 143.8981 5.0 0.0 5.82 Vp
42.3785 143.8254 5.0 0.0 5.82 Vp
42.4506 143.7525 5.0 0.0 5.82 Vp
42.5227 143.6795 5.0 0.0 5.82 Vp
42.5947 143.6063 5.0 14.0 5.82 Vp
42.6667 143.5329 5.0 111.2 3.93 Vp
42.7387 143.4594 5.0 152.5 4.94 Vp
42.8106 143.3857 5.0 48.2 5.12 Vp
42.8825 143.3118 5.0 189.6 4.73 Vp
42.9543 143.2377 5.0 38.8 5.43 Vp
43.0260 143.1635 5.0 45.7 5.11 Vp
43.0978 143.0891 5.0 20.4 5.76 Vp
43.1694 143.0145 5.0 1178.7 5.13 Vp
43.2411 142.9397 5.0 5041.9 5.86 Vp
43.3126 142.8648 5.0 1033.8 5.60 Vp
43.3841 142.7897 5.0 143.3 5.48 Vp
43.4556 142.7144 5.0 65.8 5.48 Vp
43.5270 142.6389 5.0 54.6 5.67 Vp
43.5984 142.5633 5.0 0.0 5.82 Vp
43.6697 142.4875 5.0 0.0 5.82 Vp
43.7410 142.4115 5.0 0.0 5.82 Vp
42.3332 143.9469 5.0 0.0 5.82 Vp
42.4054 143.8742 5.0 0.0 5.82 Vp
42.4775 143.8014 5.0 0.0 5.82 Vp
42.5496 143.7284 5.0 0.0 5.82 Vp
42.6217 143.6552 5.0 0.5 5.82 Vp
42.6937 143.5819 5.0 11.3 5.56 Vp
42.7657 143.5083 5.0 1662.9 5.25 Vp
42.8377 143.4347 5.0 844.4 4.74 Vp
42.9095 143.3608 5.0 8.2 5.32 Vp
42.9814 143.2868 5.0 45.1 4.71 Vp
43.0532 143.2125 5.0 137.3 4.36 Vp
43.1249 143.1382 5.0 22.5 5.60 Vp
43.1966 143.0636 5.0 3159.3 5.67 Vp
43.2683 142.9889 5.0 2913.2 5.22 Vp
43.3399 142.9140 5.0 1632.0 5.66 Vp
43.4114 142.8389 5.0 83.2 5.62 Vp
43.4830 142.7636 5.0 24.4 5.78 Vp
43.5544 142.6882 5.0 2.5 5.82 Vp
43.6258 142.6126 5.0 0.0 5.82 Vp
43.6971 142.5368 5.0 0.0 5.82 Vp
43.7684 142.4608 5.0 0.0 5.82 Vp
42.3600 143.9957 5.0 0.0 5.82 Vp
42.4322 143.9231 5.0 0.0 5.82 Vp
42.5044 143.8503 5.0 0.0 5.82 Vp
42.5765 143.7773 5.0 0.0 5.82 Vp
42.6487 143.7042 5.0 5.6 5.82 Vp
42.7207 143.6309 5.0 143.6 4.51 Vp
42.7927 143.5574 5.0 1486.0 4.77 Vp
42.8647 143.4837 5.0 1180.7 4.49 Vp
42.9366 143.4099 5.0 5.4 5.66 Vp
43.0085 143.3358 5.0 72.0 4.85 Vp
43.0803 143.2617 5.0 479.3 4.17 Vp
43.1521 143.1873 5.0 15.8 5.73 Vp
43.2238 143.1128 5.0 590.9 5.81 Vp
43.2955 143.0381 5.0 702.5 5.72 Vp
43.3672 142.9632 5.0 557.6 5.98 Vp
43.4387 142.8881 5.0 46.0 5.86 Vp
43.5103 142.8129 5.0 8.4 5.80 Vp
43.5817 142.7375 5.0 1.9 5.82 Vp
43.6532 142.6619 5.0 0.0 5.72 Vp
43.7246 142.5861 5.0 0.0 5.72 Vp
43.7959 142.5102 5.0 0.0 5.72 Vp
42.3868 144.0446 5.0 0.0 5.82 Vp
42.4590 143.9720 5.0 0.0 5.82 Vp
42.5313 143.8993 5.0 0.0 5.82 Vp
42.6034 143.8263 5.0 0.0 5.82 Vp
42.6756 143.7532 5.0 8.5 5.82 Vp
42.7477 143.6799 5.0 536.3 4.30 Vp
42.8197 143.6064 5.0 246.9 4.70 Vp
42.8917 143.5328 5.0 376.6 4.87 Vp
42.9637 143.4590 5.0 192.0 5.56 Vp
43.0356 143.3850 5.0 711.0 5.57 Vp
43.1074 143.3108 5.0 153.0 4.85 Vp
43.1792 143.2365 5.0 78.9 5.24 Vp
43.2510 143.1620 5.0 264.7 5.76 Vp
43.3227 143.0873 5.0 431.0 5.67 Vp
43.3944 143.0125 5.0 642.6 5.56 Vp
43.4660 142.9374 5.0 78.3 5.70 Vp
43.5376 142.8622 5.0 7.4 5.72 Vp
43.6091 142.7868 5.0 3.6 5.72 Vp
43.6805 142.7113 5.0 0.5 5.72 Vp
43.7519 142.6355 5.0 0.0 5.72 Vp
43.8233 142.5596 5.0 0.0 5.72 Vp
42.4403 144.1426 5.0 0.0 5.82 Vp
42.5126 144.0700 5.0 0.0 5.82 Vp
42.5849 143.9973 5.0 0.0 5.82 Vp
42.6572 143.9244 5.0 0.0 5.82 Vp
42.7294 143.8513 5.0 0.7 5.82 Vp
42.8015 143.7781 5.0 410.1 4.77 Vp
42.8736 143.7047 5.0 4473.2 5.34 Vp
42.9457 143.6311 5.0 6248.9 6.02 Vp
43.0177 143.5574 5.0 455.0 5.53 Vp
43.0897 143.4834 5.0 526.8 5.22 Vp
43.1616 143.4093 5.0 451.7 4.72 Vp
43.2335 143.3350 5.0 1080.1 4.97 Vp
43.3053 143.2606 5.0 151.0 5.42 Vp
43.3771 143.1859 5.0 1081.3 5.69 Vp
43.4488 143.1111 5.0 4011.2 5.51 Vp
43.5205 143.0362 5.0 60.4 5.62 Vp
43.5921 142.9610 5.0 22.8 5.72 Vp
43.6637 142.8857 5.0 8.0 5.72 Vp
43.7352 142.8102 5.0 2.4 5.72 Vp
43.8067 142.7345 5.0 0.0 5.72 Vp
43.8781 142.6586 5.0 0.0 5.72 Vp
42.4938 144.2407 5.0 0.0 5.72 Vp
42.5662 144.1682 5.0 0.0 5.72 Vp
42.6385 144.0955 5.0 0.0 5.72 Vp
42.7108 144.0227 5.0 0.0 5.72 Vp
42.7831 143.9496 5.0 0.0 5.72 Vp
42.8553 143.8765 5.0 2824.6 4.71 Vp
42.9274 143.8031 5.0 7109.2 4.77 Vp
42.9996 143.7296 5.0 461.5 5.28 Vp
43.0716 143.6559 5.0 2066.4 5.49 Vp
43.1437 143.5820 5.0 2472.1 5.43 Vp
43.2157 143.5079 5.0 1317.6 4.72 Vp
43.2876 143.4337 5.0 3012.0 5.06 Vp
43.3595 143.3593 5.0 55.7 5.61 Vp
43.4313 143.2847 5.0 132.2 5.84 Vp
43.5031 143.2100 5.0 603.0 5.89 Vp
43.5748 143.1350 5.0 10.5 5.72 Vp
43.6465 143.0599 5.0 31.6 5.66 Vp
43.7182 142.9846 5.0 35.7 5.59 Vp
43.7897 142.9092 5.0 7.8 5.72 Vp
43.8613 142.8335 5.0 0.0 5.72 Vp
43.9328 142.7577 5.0 0.0 5.72 Vp
42.5471 144.3389 5.0 0.0 5.72 Vp
42.6196 144.2665 5.0 0.0 5.72 Vp
42.6920 144.1939 5.0 0.0 5.72 Vp
42.7644 144.1211 5.0 0.0 5.72 Vp
42.8367 144.0481 5.0 0.0 5.72 Vp
42.9089 143.9750 5.0 928.1 4.60 Vp
42.9812 143.9017 5.0 1621.7 4.44 Vp
43.0534 143.8282 5.0 185.6 5.22 Vp
43.1255 143.7546 5.0 300.7 5.52 Vp
43.1976 143.6808 5.0 811.0 5.85 Vp
43.2696 143.6068 5.0 305.5 5.67 Vp
43.3416 143.5326 5.0 126.9 5.49 Vp
43.4136 143.4582 5.0 43.4 5.57 Vp
43.4855 143.3837 5.0 35.3 5.71 Vp
43.5573 143.3090 5.0 30.7 5.60 Vp
43.6291 143.2341 5.0 3.3 5.72 Vp
43.7009 143.1591 5.0 23.6 5.72 Vp
43.7726 143.0838 5.0 423.2 5.41 Vp
43.8442 143.0084 5.0 300.6 5.38 Vp
43.9158 142.9328 5.0 0.0 5.72 Vp
43.9874 142.8571 5.0 0.0 5.72 Vp
42.6004 144.4373 5.0 0.0 5.72 Vp
42.6729 144.3650 5.0 0.0 5.72 Vp
42.7454 144.2924 5.0 0.0 5.72 Vp
42.8178 144.2197 5.0 0.0 5.72 Vp
42.8902 144.1468 5.0 0.0 5.72 Vp
42.9625 144.0737 5.0 686.7 4.69 Vp
43.0348 144.0005 5.0 1202.8 4.52 Vp
43.1071 143.9270 5.0 1860.7 5.32 Vp
43.1793 143.8534 5.0 2819.8 5.41 Vp
43.2514 143.7797 5.0 7203.4 5.80 Vp
43.3235 143.7057 5.0 5107.5 5.82 Vp
43.3956 143.6316 5.0 828.3 5.70 Vp
43.4676 143.5573 5.0 239.0 5.52 Vp
43.5396 143.4828 5.0 401.2 5.84 Vp
43.6115 143.4082 5.0 386.9 5.67 Vp
43.6833 143.3334 5.0 13.3 5.72 Vp
43.7551 143.2584 5.0 20.5 5.72 Vp
43.8269 143.1832 5.0 283.3 5.92 Vp
43.8986 143.1078 5.0 215.4 5.75 Vp
43.9703 143.0323 5.0 0.0 5.72 Vp
44.0419 142.9565 5.0 0.0 5.72 Vp
42.6536 144.5359 5.0 0.0 5.72 Vp
42.7262 144.4636 5.0 0.0 5.72 Vp
42.7987 144.3911 5.0 0.0 5.72 Vp
42.8712 144.3184 5.0 0.0 5.72 Vp
42.9436 144.2456 5.0 0.0 5.72 Vp
43.0160 144.1726 5.0 0.0 5.72 Vp
43.0884 144.0994 5.0 0.1 5.72 Vp
43.1607 144.0260 5.0 18.7 5.72 Vp
43.2329 143.9525 5.0 89.5 5.42 Vp
43.3052 143.8788 5.0 246.6 5.53 Vp
43.3773 143.8049 5.0 162.0 5.68 Vp
43.4494 143.7308 5.0 1113.6 5.73 Vp
43.5215 143.6566 5.0 443.1 5.52 Vp
43.5935 143.5822 5.0 596.3 5.84 Vp
43.6655 143.5076 5.0 713.6 5.80 Vp
43.7374 143.4328 5.0 3.3 5.72 Vp
43.8093 143.3578 5.0 0.0 5.72 Vp
43.8811 143.2827 5.0 0.0 5.72 Vp
43.9529 143.2074 5.0 0.0 5.72 Vp
44.0246 143.1319 5.0 0.0 5.72 Vp
44.0963 143.0562 5.0 0.0 5.72 Vp
41.0206 141.6489 10.0 0.0 6.02 Vp
41.0914 141.5751 10.0 0.0 6.25 Vp
41.1621 141.5011 10.0 0.0 6.40 Vp
41.2328 141.4270 10.0 0.0 6.44 Vp
41.3034 141.3527 10.0 23.7 6.24 Vp
41.3740 141.2782 10.0 4.8 6.60 Vp
41.4445 141.2036 10.0 0.0 6.44 Vp
41.5150 141.1288 10.0 0.0 6.24 Vp
41.5854 141.0538 10.0 0.0 6.22 Vp
41.6558 140.9787 10.0 0.0 6.28 Vp
41.7261 140.9034 10.0 0.0 6.30 Vp
41.7964 140.8279 10.0 0.0 5.87 Vp
41.8667 140.7523 10.0 0.0 5.76 Vp
41.9369 140.6765 10.0 0.0 5.84 Vp
42.0070 140.6006 10.0 0.1 5.92 Vp
42.0771 140.5244 10.0 0.0 5.98 Vp
42.1471 140.4482 10.0 0.0 6.02 Vp
42.2171 140.3717 10.0 0.0 5.82 Vp
42.2870 140.2951 10.0 0.0 5.78 Vp
42.3569 140.2183 10.0 0.0 5.76 Vp
42.4267 140.1413 10.0 0.0 5.78 Vp
41.0762 141.7428 10.0 0.0 6.02 Vp
41.1470 141.6691 10.0 0.0 6.14 Vp
41.2178 141.5951 10.0 0.0 6.36 Vp
41.2885 141.5210 10.0 0.0 6.30 Vp
41.3592 141.4467 10.0 1320.2 6.10 Vp
41.4298 141.3723 10.0 1210.0 6.64 Vp
41.5004 141.2977 10.0 18.7 6.50 Vp
41.5710 141.2229 10.0 20.3 6.19 Vp
41.6415 141.1480 10.0 17.6 6.32 Vp
41.7119 141.0729 10.0 13.5 6.21 Vp
41.7823 140.9977 10.0 18.9 6.30 Vp
41.8527 140.9222 10.0 26.0 5.93 Vp
41.9230 140.8466 10.0 6.6 6.02 Vp
41.9932 140.7709 10.0 5.5 5.94 Vp
42.0634 140.6950 10.0 21.4 6.06 Vp
42.1336 140.6189 10.0 0.5 5.99 Vp
42.2037 140.5426 10.0 0.0 5.95 Vp
42.2738 140.4662 10.0 0.0 5.79 Vp
42.3437 140.3896 10.0 0.0 5.75 Vp
42.4137 140.3129 10.0 0.0 5.75 Vp
42.4836 140.2359 10.0 0.0 5.87 Vp
41.1317 141.8369 10.0 0.0 6.02 Vp
41.2026 141.7632 10.0 0.0 6.02 Vp
41.2734 141.6893 10.0 0.0 6.02 Vp
41.3442 141.6152 10.0 0.0 6.59 Vp
41.4149 141.5410 10.0 1116.8 6.05 Vp
41.4856 141.4666 10.0 789.7 6.24 Vp
41.5563 141.3920 10.0 3.5 6.28 Vp
41.6269 141.3173 10.0 6.2 6.00 Vp
41.6975 141.2424 10.0 8.9 6.16 Vp
41.7680 141.1673 10.0 11.1 6.27 Vp
41.8385 141.0921 10.0 2869.1 6.61 Vp
41.9089 141.0167 10.0 4574.1 6.27 Vp
41.9792 140.9412 10.0 154.0 6.34 Vp
42.0496 140.8654 10.0 29.8 6.24 Vp
42.1198 140.7896 10.0 9.8 6.16 Vp
42.1901 140.7135 10.0 0.2 6.12 Vp
42.2602 140.6373 10.0 0.0 6.03 Vp
42.3303 140.5609 10.0 0.0 5.91 Vp
42.4004 140.4843 10.0 0.0 5.98 Vp
42.4704 140.4076 10.0 0.0 5.90 Vp
42.5403 140.3307 10.0 0.0 6.11 Vp
41.1871 141.9311 10.0 0.0 6.02 Vp
41.2580 141.8574 10.0 0.0 6.02 Vp
41.3289 141.7836 10.0 0.0 6.02 Vp
41.3998 141.7095 10.0 0.0 6.02 Vp
41.4706 141.6354 10.0 0.0 6.02 Vp
41.5414 141.5610 10.0 0.0 6.02 Vp
41.6121 141.4865 10.0 0.0 6.02 Vp
41.6828 141.4118 10.0 0.0 6.02 Vp
41.7534 141.3369 10.0 0.0 6.02 Vp
41.8240 141.2619 10.0 0.2 6.24 Vp
41.8945 141.1867 10.0 4942.3 6.64 Vp
41.9650 141.1114 10.0 5749.9 6.54 Vp
42.0354 141.0359 10.0 120.7 6.24 Vp
42.1058 140.9602 10.0 184.0 6.19 Vp
42.1761 140.8843 10.0 66.1 6.09 Vp
42.2464 140.8083 10.0 3.7 6.21 Vp
42.3167 140.7321 10.0 0.0 6.15 Vp
42.3868 140.6557 10.0 0.0 6.01 Vp
42.4570 140.5792 10.0 0.0 6.26 Vp
42.5270 140.5025 10.0 0.0 6.25 Vp
42.5970 140.4257 10.0 0.0 6.18 Vp
41.2424 142.0255 10.0 0.0 6.02 Vp
41.3134 141.9519 10.0 0.0 6.02 Vp
41.3844 141.8781 10.0 0.0 6.02 Vp
41.4553 141.8041 10.0 0.0 6.02 Vp
41.5262 141.7299 10.0 0.0 6.02 Vp
41.5970 141.6556 10.0 0.0 6.02 Vp
41.6678 141.5811 10.0 0.0 6.02 Vp
41.7386 141.5065 10.0 0.0 6.02 Vp
41.8093 141.4316 10.0 0.0 6.02 Vp
41.8799 141.3567 10.0 0.0 6.09 Vp
41.9505 141.2815 10.0 63.3 6.39 Vp
42.0210 141.2062 10.0 90.2 6.33 Vp
42.0915 141.1307 10.0 15.7 6.23 Vp
42.1620 141.0551 10.0 59.8 6.03 Vp
42.2324 140.9792 10.0 140.2 6.05 Vp
42.3027 140.9033 10.0 91.5 6.22 Vp
42.3730 140.8271 10.0 32.1 6.21 Vp
42.4433 140.7508 10.0 2.4 6.19 Vp
42.5134 140.6743 10.0 0.0 6.26 Vp
42.5836 140.5976 10.0 0.0 6.32 Vp
42.6537 140.5208 10.0 0.0 6.01 Vp
41.2977 142.1201 10.0 0.0 6.02 Vp
41.3688 142.0465 10.0 0.0 6.02 Vp
41.4398 141.9727 10.0 0.0 6.02 Vp
41.5108 141.8988 10.0 0.0 6.02 Vp
41.5817 141.8246 10.0 0.0 6.02 Vp
41.6526 141.7504 10.0 0.0 6.02 Vp
41.7235 141.6759 10.0 0.0 6.02 Vp
41.7943 141.6013 10.0 0.0 6.02 Vp
41.8650 141.5265 10.0 0.0 6.02 Vp
41.9357 141.4516 10.0 0.0 6.02 Vp
42.0064 141.3765 10.0 0.0 6.19 Vp
42.0770 141.3012 10.0 2.9 6.24 Vp
42.1476 141.2258 10.0 0.4 6.02 Vp
42.2181 141.1501 10.0 12.9 6.01 Vp
42.2885 141.0744 10.0 78.5 6.19 Vp
42.3590 140.9984 10.0 557.0 6.35 Vp
42.4293 140.9223 10.0 144.0 6.21 Vp
42.4996 140.8460 10.0 82.8 6.29 Vp
42.5699 140.7695 10.0 8.4 6.18 Vp
42.6401 140.6929 10.0 0.0 6.18 Vp
42.7102 140.6161 10.0 0.0 5.93 Vp
41.3529 142.2148 10.0 0.0 6.02 Vp
41.4240 142.1413 10.0 0.0 6.02 Vp
41.4951 142.0675 10.0 0.0 6.02 Vp
41.5662 141.9936 10.0 0.0 6.02 Vp
41.6372 141.9195 10.0 0.0 6.02 Vp
41.7081 141.8453 10.0 0.0 6.02 Vp
41.7791 141.7709 10.0 0.0 6.02 Vp
41.8499 141.6963 10.0 0.0 6.02 Vp
41.9207 141.6216 10.0 0.0 6.02 Vp
41.9915 141.5467 10.0 0.0 6.02 Vp
42.0622 141.4716 10.0 0.0 6.02 Vp
42.1329 141.3964 10.0 1.4 6.02 Vp
42.2035 141.3210 10.0 0.0 6.02 Vp
42.2741 141.2454 10.0 3.0 6.02 Vp
42.3446 141.1696 10.0 285.7 6.41 Vp
42.4151 141.0937 10.0 4635.9 6.74 Vp
42.4855 141.0176 10.0 1795.6 6.93 Vp
42.5559 140.9414 10.0 103.1 6.30 Vp
42.6262 140.8650 10.0 5.7 6.05 Vp
42.6965 140.7884 10.0 0.0 6.05 Vp
42.7667 140.7116 10.0 0.0 5.95 Vp
41.4080 142.3097 10.0 0.0 6.02 Vp
41.4792 142.2362 10.0 0.0 6.02 Vp
41.5504 142.1625 10.0 0.0 6.02 Vp
41.6215 142.0886 10.0 0.0 6.02 Vp
41.6926 142.0146 10.0 0.0 6.02 Vp
41.7636 141.9404 10.0 0.0 6.02 Vp
41.8345 141.8660 10.0 0.0 6.02 Vp
41.9055 141.7915 10.0 0.0 6.02 Vp
41.9764 141.7168 10.0 0.0 6.02 Vp
42.0472 141.6419 10.0 0.0 6.02 Vp
42.1180 141.5669 10.0 0.0 6.02 Vp
42.1887 141.4917 10.0 1.9 6.02 Vp
42.2594 141.4163 10.0 0.0 6.02 Vp
42.3301 141.3408 10.0 0.0 6.05 Vp
42.4006 141.2651 10.0 205.3 6.40 Vp
42.4712 141.1892 10.0 3292.0 6.92 Vp
42.5417 141.1132 10.0 962.1 6.13 Vp
42.6121 141.0369 10.0 492.8 6.07 Vp
42.6825 140.9606 10.0 206.3 5.90 Vp
42.7528 140.8840 10.0 63.4 5.93 Vp
42.8231 140.8073 10.0 0.0 5.97 Vp
41.4631 142.4048 10.0 0.0 6.02 Vp
41.5343 142.3313 10.0 0.0 6.02 Vp
41.6055 142.2576 10.0 0.0 6.02 Vp
41.6767 142.1838 10.0 0.0 6.02 Vp
41.7478 142.1098 10.0 0.0 6.02 Vp
41.8189 142.0357 10.0 0.0 6.02 Vp
41.8900 141.9613 10.0 0.0 6.02 Vp
41.9610 141.8869 10.0 0.0 6.02 Vp
42.0319 141.8122 10.0 0.0 6.02 Vp
42.1028 141.7374 10.0 0.0 6.02 Vp
42.1737 141.6624 10.0 0.0 6.02 Vp
42.2445 141.5872 10.0 3.3 6.02 Vp
42.3152 141.5119 10.0 0.0 6.02 Vp
42.3859 141.4364 10.0 0.0 5.98 Vp
42.4566 141.3607 10.0 175.1 6.09 Vp
42.5272 141.2849 10.0 323.7 6.09 Vp
42.5977 141.2089 10.0 481.7 6.03 Vp
42.6682 141.1327 10.0 1125.0 6.24 Vp
42.7387 141.0564 10.0 1250.5 6.05 Vp
42.8090 140.9798 10.0 289.4 5.96 Vp
42.8794 140.9031 10.0 0.0 6.36 Vp
41.5180 142.5000 10.0 0.0 6.02 Vp
41.5894 142.4266 10.0 0.0 6.02 Vp
41.6606 142.3530 10.0 0.0 6.02 Vp
41.7319 142.2792 10.0 0.0 6.02 Vp
41.8031 142.2052 10.0 0.0 6.02 Vp
41.8742 142.1311 10.0 0.0 6.02 Vp
41.9453 142.0568 10.0 0.0 6.02 Vp
42.0164 141.9824 10.0 0.0 6.02 Vp
42.0874 141.9078 10.0 0.0 6.02 Vp
42.1583 141.8330 10.0 0.0 6.02 Vp
42.2293 141.7580 10.0 0.0 6.02 Vp
42.3001 141.6829 10.0 5.2 6.02 Vp
42.3709 141.6076 10.0 0.3 6.02 Vp
42.4417 141.5322 10.0 3.9 5.90 Vp
42.5124 141.4565 10.0 761.7 5.67 Vp
42.5831 141.3807 10.0 906.5 5.73 Vp
42.6537 141.3047 10.0 30.7 5.88 Vp
42.7243 141.2286 10.0 155.0 6.23 Vp
42.7948 141.1523 10.0 317.7 6.35 Vp
42.8652 141.0758 10.0 27.5 6.36 Vp
42.9356 140.9992 10.0 0.0 6.13 Vp
41.5729 142.5954 10.0 0.0 6.02 Vp
41.6443 142.5220 10.0 0.0 6.02 Vp
41.7156 142.4484 10.0 0.0 6.02 Vp
41.7869 142.3747 10.0 0.0 6.02 Vp
41.8582 142.3008 10.0 0.0 6.02 Vp
41.9294 142.2267 10.0 0.0 6.02 Vp
42.0006 142.1525 10.0 0.0 6.02 Vp
42.0717 142.0781 10.0 0.0 6.02 Vp
42.1428 142.0035 10.0 0.0 6.02 Vp
42.2138 141.9288 10.0 0.0 6.02 Vp
42.2848 141.8538 10.0 0.0 6.02 Vp
42.3557 141.7788 10.0 5.3 6.02 Vp
42.4266 141.7035 10.0 1.2 5.91 Vp
42.4974 141.6281 10.0 17.8 5.93 Vp
42.5682 141.5525 10.0 115.2 5.73 Vp
42.6389 141.4767 10.0 163.7 5.83 Vp
42.7096 141.4008 10.0 153.7 5.75 Vp
42.7802 141.3247 10.0 67.9 5.97 Vp
42.8508 141.2484 10.0 39.0 6.08 Vp
42.9213 141.1720 10.0 14.2 5.98 Vp
42.9918 141.0954 10.0 0.0 5.92 Vp
41.6277 142.6910 10.0 0.0 6.02 Vp
41.6992 142.6176 10.0 0.0 6.02 Vp
41.7706 142.5441 10.0 0.0 6.02 Vp
41.8419 142.4704 10.0 0.0 6.02 Vp
41.9133 142.3965 10.0 0.0 6.02 Vp
41.9845 142.3225 10.0 0.0 6.02 Vp
42.0558 142.2483 10.0 0.0 6.02 Vp
42.1270 142.1739 10.0 0.7 6.02 Vp
42.1981 142.0994 10.0 1.2 6.02 Vp
42.2692 142.0247 10.0 4.5 6.02 Vp
42.3402 141.9498 10.0 45.7 5.87 Vp
42.4112 141.8748 10.0 19.1 5.86 Vp
42.4822 141.7996 10.0 9.2 5.94 Vp
42.5531 141.7242 10.0 37.7 5.79 Vp
42.6239 141.6487 10.0 19.7 5.56 Vp
42.6947 141.5729 10.0 102.9 5.64 Vp
42.7654 141.4970 10.0 2421.7 5.66 Vp
42.8361 141.4210 10.0 2037.8 5.97 Vp
42.9067 141.3447 10.0 58.2 6.02 Vp
42.9773 141.2683 10.0 11.4 6.28 Vp
43.0478 141.1917 10.0 0.0 6.02 Vp
41.6825 142.7867 10.0 0.0 6.02 Vp
41.7540 142.7134 10.0 0.0 6.02 Vp
41.8254 142.6399 10.0 0.0 6.02 Vp
41.8969 142.5663 10.0 0.0 6.02 Vp
41.9683 142.4924 10.0 0.0 6.02 Vp
42.0396 142.4184 10.0 0.0 6.02 Vp
42.1109 142.3443 10.0 1.5 5.77 Vp
42.1821 142.2700 10.0 50.3 5.05 Vp
42.2533 142.1955 10.0 39.5 4.99 Vp
42.3245 142.1208 10.0 34.0 4.79 Vp
42.3956 142.0460 10.0 210.8 4.40 Vp
42.4666 141.9710 10.0 719.4 4.86 Vp
42.5377 141.8958 10.0 736.1 5.03 Vp
42.6086 141.8205 10.0 2354.5 5.40 Vp
42.6795 141.7450 10.0 174.1 5.16 Vp
42.7504 141.6693 10.0 151.7 5.32 Vp
42.8212 141.5934 10.0 1490.9 5.39 Vp
42.8919 141.5174 10.0 1443.8 5.48 Vp
42.9626 141.4412 10.0 790.8 6.10 Vp
43.0333 141.3649 10.0 10.3 5.93 Vp
43.1038 141.2883 10.0 0.0 6.06 Vp
41.7371 142.8826 10.0 0.0 6.02 Vp
41.8087 142.8093 10.0 0.0 6.02 Vp
41.8802 142.7359 10.0 0.0 6.02 Vp
41.9517 142.6623 10.0 0.0 6.02 Vp
42.0232 142.5885 10.0 0.0 6.02 Vp
42.0946 142.5146 10.0 0.0 5.87 Vp
42.1659 142.4405 10.0 8.2 5.57 Vp
42.2372 142.3662 10.0 131.8 4.33 Vp
42.3085 142.2917 10.0 191.2 4.25 Vp
42.3797 142.2171 10.0 76.8 4.30 Vp
42.4509 142.1423 10.0 857.2 4.52 Vp
42.5220 142.0674 10.0 1359.0 4.62 Vp
42.5931 141.9922 10.0 769.0 4.40 Vp
42.6641 141.9169 10.0 2135.7 4.69 Vp
42.7351 141.8415 10.0 266.7 5.12 Vp
42.8060 141.7658 10.0 524.4 5.31 Vp
42.8768 141.6900 10.0 1570.8 5.19 Vp
42.9476 141.6140 10.0 585.0 5.64 Vp
43.0184 141.5379 10.0 321.5 5.76 Vp
43.0891 141.4615 10.0 8.5 5.67 Vp
43.1598 141.3851 10.0 0.0 5.91 Vp
41.7644 142.9306 10.0 0.0 6.02 Vp
41.8360 142.8573 10.0 0.0 6.02 Vp
41.9076 142.7839 10.0 0.0 5.96 Vp
41.9791 142.7104 10.0 31.6 5.80 Vp
42.0506 142.6366 10.0 39.7 5.59 Vp
42.1220 142.5627 10.0 11.0 5.96 Vp
42.1934 142.4886 10.0 60.1 5.15 Vp
42.2647 142.4143 10.0 327.1 4.35 Vp
42.3360 142.3399 10.0 971.6 4.31 Vp
42.4073 142.2653 10.0 142.4 4.31 Vp
42.4785 142.1906 10.0 506.7 4.22 Vp
42.5496 142.1156 10.0 486.7 4.63 Vp
42.6207 142.0405 10.0 208.4 4.48 Vp
42.6918 141.9652 10.0 245.5 4.71 Vp
42.7628 141.8898 10.0 356.2 5.07 Vp
42.8337 141.8142 10.0 873.5 5.18 Vp
42.9046 141.7384 10.0 215.6 5.39 Vp
42.9755 141.6624 10.0 50.1 5.68 Vp
43.0463 141.5863 10.0 46.3 5.41 Vp
43.1170 141.5100 10.0 2.0 5.49 Vp
43.1877 141.4335 10.0 0.0 5.75 Vp
41.7917 142.9787 10.0 0.0 6.02 Vp
41.8633 142.9054 10.0 0.0 6.02 Vp
41.9349 142.8320 10.0 0.0 5.97 Vp
42.0065 142.7585 10.0 95.4 5.21 Vp
42.0780 142.6847 10.0 117.9 5.28 Vp
42.1495 142.6108 10.0 93.2 5.44 Vp
42.2209 142.5368 10.0 746.0 5.65 Vp
42.2922 142.4625 10.0 446.8 4.31 Vp
42.3636 142.3882 10.0 939.4 4.40 Vp
42.4348 142.3136 10.0 108.8 4.14 Vp
42.5061 142.2388 10.0 217.2 4.42 Vp
42.5773 142.1639 10.0 304.8 4.57 Vp
42.6484 142.0888 10.0 251.4 4.59 Vp
42.7195 142.0136 10.0 190.1 4.86 Vp
42.7905 141.9382 10.0 843.2 5.83 Vp
42.8615 141.8625 10.0 1162.1 4.99 Vp
42.9324 141.7868 10.0 176.0 5.27 Vp
43.0033 141.7108 10.0 60.3 5.63 Vp
43.0741 141.6347 10.0 23.6 5.38 Vp
43.1449 141.5584 10.0 1.5 5.53 Vp
43.2156 141.4820 10.0 0.0 5.80 Vp
41.8189 143.0267 10.0 0.0 6.02 Vp
41.8906 142.9535 10.0 0.0 5.81 Vp
41.9622 142.8802 10.0 0.6 5.76 Vp
42.0338 142.8066 10.0 44.1 4.53 Vp
42.1054 142.7329 10.0 61.0 4.27 Vp
42.1769 142.6590 10.0 389.6 5.74 Vp
42.2483 142.5850 10.0 3068.3 5.98 Vp
42.3197 142.5108 10.0 1337.9 4.98 Vp
42.3911 142.4364 10.0 629.0 4.68 Vp
42.4624 142.3619 10.0 209.0 4.97 Vp
42.5336 142.2871 10.0 181.5 4.56 Vp
42.6049 142.2122 10.0 352.6 4.65 Vp
42.6760 142.1372 10.0 357.4 4.79 Vp
42.7471 142.0620 10.0 400.8 4.95 Vp
42.8182 141.9865 10.0 619.0 5.42 Vp
42.8892 141.9110 10.0 290.3 4.78 Vp
42.9602 141.8352 10.0 287.1 5.23 Vp
43.0311 141.7593 10.0 266.9 5.35 Vp
43.1019 141.6832 10.0 16.1 5.30 Vp
43.1727 141.6069 10.0 1.0 5.45 Vp
43.2435 141.5305 10.0 0.0 5.74 Vp
41.8462 143.0749 10.0 0.0 5.89 Vp
41.9179 143.0017 10.0 2.2 5.84 Vp
41.9895 142.9283 10.0 4.2 5.49 Vp
42.0612 142.8548 10.0 18.6 4.37 Vp
42.1327 142.7811 10.0 56.3 4.30 Vp
42.2043 142.7073 10.0 1592.3 5.88 Vp
42.2757 142.6333 10.0 5070.6 5.87 Vp
42.3472 142.5591 10.0 3207.3 5.44 Vp
42.4186 142.4847 10.0 1797.4 5.31 Vp
42.4899 142.4102 10.0 534.1 4.79 Vp
42.5612 142.3355 10.0 718.1 4.83 Vp
42.6324 142.2606 10.0 1176.8 5.19 Vp
42.7036 142.1856 10.0 790.9 5.03 Vp
42.7748 142.1104 10.0 520.3 5.11 Vp
42.8459 142.0350 10.0 412.5 4.96 Vp
42.9169 141.9594 10.0 227.2 5.18 Vp
42.9879 141.8837 10.0 597.6 5.15 Vp
43.0589 141.8078 10.0 1202.3 5.14 Vp
43.1297 141.7317 10.0 17.0 5.32 Vp
43.2006 141.6555 10.0 0.4 5.50 Vp
43.2714 141.5791 10.0 0.0 5.82 Vp
41.8734 143.1230 10.0 0.0 5.87 Vp
41.9451 143.0499 10.0 289.2 5.38 Vp
42.0168 142.9766 10.0 198.2 5.45 Vp
42.0885 142.9031 10.0 374.9 4.86 Vp
42.1601 142.8294 10.0 676.9 4.81 Vp
42.2316 142.7556 10.0 2108.4 5.71 Vp
42.3032 142.6816 10.0 4499.5 5.58 Vp
42.3746 142.6074 10.0 2204.3 5.50 Vp
42.4460 142.5331 10.0 2567.5 5.65 Vp
42.5174 142.4586 10.0 2637.0 6.23 Vp
42.5887 142.3839 10.0 3907.4 6.07 Vp
42.6600 142.3091 10.0 2246.7 5.50 Vp
42.7312 142.2340 10.0 1219.4 5.28 Vp
42.8024 142.1588 10.0 1082.0 5.11 Vp
42.8735 142.0835 10.0 843.0 5.35 Vp
42.9446 142.0079 10.0 900.6 5.60 Vp
43.0156 141.9323 10.0 535.4 4.99 Vp
43.0866 141.8564 10.0 282.5 5.42 Vp
43.1575 141.7803 10.0 16.5 5.39 Vp
43.2284 141.7041 10.0 0.0 5.62 Vp
43.2992 141.6277 10.0 0.0 5.81 Vp
41.9006 143.1712 10.0 0.0 5.73 Vp
41.9724 143.0981 10.0 1125.1 5.30 Vp
42.0441 143.0248 10.0 1593.2 5.44 Vp
42.1158 142.9513 10.0 1645.1 5.74 Vp
42.1874 142.8777 10.0 2898.2 5.96 Vp
42.2590 142.8039 10.0 2384.6 5.33 Vp
42.3305 142.7299 10.0 2837.5 5.30 Vp
42.4020 142.6558 10.0 1543.2 5.50 Vp
42.4735 142.5815 10.0 1444.2 5.38 Vp
42.5449 142.5070 10.0 2852.9 6.06 Vp
42.6162 142.4324 10.0 3169.3 6.04 Vp
42.6876 142.3575 10.0 1128.6 5.39 Vp
42.7588 142.2825 10.0 531.0 4.40 Vp
42.8300 142.2074 10.0 1305.4 5.65 Vp
42.9012 142.1320 10.0 1258.4 5.46 Vp
42.9723 142.0565 10.0 1166.2 5.72 Vp
43.0433 141.9808 10.0 290.4 5.07 Vp
43.1143 141.9050 10.0 361.3 5.37 Vp
43.1853 141.8289 10.0 439.6 5.57 Vp
43.2562 141.7527 10.0 0.0 5.66 Vp
43.3270 141.6763 10.0 0.0 5.85 Vp
41.9278 143.2195 10.0 0.0 5.61 Vp
41.9996 143.1464 10.0 1065.9 5.46 Vp
42.0713 143.0731 10.0 2160.5 5.50 Vp
42.1430 142.9997 10.0 448.6 5.52 Vp
42.2147 142.9261 10.0 4098.3 5.71 Vp
42.2863 142.8523 10.0 4299.6 6.13 Vp
42.3579 142.7783 10.0 3663.3 6.46 Vp
42.4294 142.7042 10.0 864.5 5.41 Vp
42.5009 142.6299 10.0 880.8 5.21 Vp
42.5723 142.5555 10.0 2226.2 5.21 Vp
42.6437 142.4808 10.0 4822.1 6.21 Vp
42.7151 142.4060 10.0 7757.2 6.64 Vp
42.7864 142.3311 10.0 2169.3 5.08 Vp
42.8576 142.2559 10.0 211.6 4.56 Vp
42.9288 142.1806 10.0 219.6 5.28 Vp
42.9999 142.1051 10.0 300.7 5.46 Vp
43.0710 142.0294 10.0 52.9 5.18 Vp
43.1421 141.9536 10.0 754.8 5.25 Vp
43.2130 141.8776 10.0 1541.4 5.28 Vp
43.2840 141.8014 10.0 0.0 5.75 Vp
43.3548 141.7251 10.0 0.0 5.99 Vp
41.9549 143.2678 10.0 0.0 5.75 Vp
42.0268 143.1947 10.0 704.9 5.45 Vp
42.0985 143.1214 10.0 984.2 5.52 Vp
42.1703 143.0480 10.0 437.6 5.78 Vp
42.2420 142.9745 10.0 4400.3 4.86 Vp
42.3136 142.9007 10.0 3673.0 5.12 Vp
42.3852 142.8268 10.0 3259.2 6.52 Vp
42.4568 142.7527 10.0 635.9 6.21 Vp
42.5283 142.6784 10.0 971.1 5.90 Vp
42.5998 142.6040 10.0 1303.3 5.51 Vp
42.6712 142.5294 10.0 1152.6 5.54 Vp
42.7426 142.4546 10.0 2839.6 6.00 Vp
42.8139 142.3796 10.0 2250.0 5.94 Vp
42.8852 142.3045 10.0 163.6 5.24 Vp
42.9564 142.2292 10.0 130.5 5.55 Vp
43.0276 142.1537 10.0 92.1 5.68 Vp
43.0987 142.0781 10.0 81.4 5.66 Vp
43.1697 142.0023 10.0 576.3 5.42 Vp
43.2408 141.9263 10.0 468.5 5.17 Vp
43.3117 141.8501 10.0 0.0 5.82 Vp
43.3826 141.7738 10.0 0.0 6.03 Vp
41.9821 143.3161 10.0 0.0 5.60 Vp
42.0539 143.2431 10.0 364.6 5.50 Vp
42.1257 143.1698 10.0 744.8 5.88 Vp
42.1975 143.0964 10.0 415.8 6.39 Vp
42.2692 143.0229 10.0 2380.3 5.37 Vp
42.3409 142.9491 10.0 1978.5 5.67 Vp
42.4126 142.8752 10.0 2044.6 6.81 Vp
42.4842 142.8012 10.0 577.8 6.44 Vp
42.5557 142.7269 10.0 689.7 5.92 Vp
42.6272 142.6525 10.0 1470.6 6.34 Vp
42.6987 142.5779 10.0 1077.5 5.99 Vp
42.7701 142.5032 10.0 1220.7 5.62 Vp
42.8414 142.4282 10.0 1458.3 6.33 Vp
42.9127 142.3531 10.0 276.3 5.89 Vp
42.9840 142.2779 10.0 88.0 5.50 Vp
43.0552 142.2024 10.0 43.8 5.33 Vp
43.1263 142.1268 10.0 80.6 5.46 Vp
43.1974 142.0510 10.0 359.2 5.63 Vp
43.2685 141.9751 10.0 77.3 5.50 Vp
43.3394 141.8989 10.0 0.0 5.67 Vp
43.4104 141.8226 10.0 0.0 5.93 Vp
42.0092 143.3645 10.0 0.0 5.81 Vp
42.0811 143.2915 10.0 170.0 6.01 Vp
42.1529 143.2182 10.0 440.4 5.82 Vp
42.2247 143.1449 10.0 1128.3 6.80 Vp
42.2965 143.0714 10.0 4670.5 7.25 Vp
42.3682 142.9977 10.0 5689.9 7.80 Vp
42.4399 142.9238 10.0 1167.1 6.45 Vp
42.5115 142.8497 10.0 923.4 7.71 Vp
42.5831 142.7755 10.0 833.8 6.54 Vp
42.6546 142.7011 10.0 872.2 6.15 Vp
42.7261 142.6266 10.0 1050.9 6.53 Vp
42.7975 142.5518 10.0 961.7 5.89 Vp
42.8689 142.4769 10.0 1436.4 6.02 Vp
42.9402 142.4018 10.0 439.4 5.92 Vp
43.0115 142.3266 10.0 54.0 5.42 Vp
43.0827 142.2511 10.0 38.5 5.44 Vp
43.1539 142.1756 10.0 59.6 5.46 Vp
43.2251 142.0998 10.0 201.9 5.65 Vp
43.2961 142.0238 10.0 10.0 5.45 Vp
43.3672 141.9477 10.0 0.0 5.77 Vp
43.4381 141.8714 10.0 0.0 5.98 Vp
42.0363 143.4129 10.0 0.0 5.62 Vp
42.1082 143.3399 10.0 72.9 6.02 Vp
42.1801 143.2667 10.0 92.6 5.94 Vp
42.2519 143.1934 10.0 2254.7 5.66 Vp
42.3237 143.1199 10.0 2222.7 6.50 Vp
42.3955 143.0462 10.0 3557.2 7.00 Vp
42.4672 142.9723 10.0 1299.1 7.12 Vp
42.5388 142.8983 10.0 1296.7 6.95 Vp
42.6104 142.8241 10.0 739.5 7.00 Vp
42.6820 142.7497 10.0 752.0 7.15 Vp
42.7535 142.6752 10.0 683.5 6.35 Vp
42.8250 142.6005 10.0 775.5 6.21 Vp
42.8964 142.5256 10.0 415.4 5.73 Vp
42.9677 142.4506 10.0 102.6 5.58 Vp
43.0390 142.3753 10.0 48.6 5.35 Vp
43.1103 142.2999 10.0 41.0 5.10 Vp
43.1815 142.2243 10.0 32.5 5.27 Vp
43.2527 142.1486 10.0 26.2 5.47 Vp
43.3238 142.0727 10.0 8.7 5.48 Vp
43.3948 141.9966 10.0 0.0 5.66 Vp
43.4659 141.9203 10.0 0.0 5.57 Vp
42.0634 143.4613 10.0 0.0 6.02 Vp
42.1353 143.3884 10.0 17.4 6.02 Vp
42.2072 143.3152 10.0 60.6 5.89 Vp
42.2791 143.2419 10.0 2100.1 5.98 Vp
42.3509 143.1684 10.0 1407.7 6.71 Vp
42.4227 143.0948 10.0 1905.4 5.68 Vp
42.4944 143.0209 10.0 2030.8 6.28 Vp
42.5661 142.9469 10.0 2238.3 6.23 Vp
42.6377 142.8728 10.0 1020.8 6.59 Vp
42.7093 142.7984 10.0 1348.3 6.85 Vp
42.7809 142.7239 10.0 944.9 6.99 Vp
42.8524 142.6492 10.0 782.8 6.21 Vp
42.9238 142.5744 10.0 478.2 5.86 Vp
42.9952 142.4993 10.0 129.5 5.95 Vp
43.0666 142.4241 10.0 51.8 5.47 Vp
43.1379 142.3487 10.0 95.9 5.79 Vp
43.2091 142.2732 10.0 55.8 5.42 Vp
43.2803 142.1975 10.0 28.9 5.06 Vp
43.3514 142.1216 10.0 11.6 5.50 Vp
43.4225 142.0455 10.0 0.0 5.78 Vp
43.4935 141.9692 10.0 0.0 5.69 Vp
42.0904 143.5098 10.0 0.0 6.02 Vp
42.1624 143.4369 10.0 0.0 6.02 Vp
42.2343 143.3638 10.0 6.6 5.95 Vp
42.3062 143.2905 10.0 3100.6 5.61 Vp
42.3781 143.2170 10.0 2251.6 6.63 Vp
42.4499 143.1434 10.0 2193.9 5.25 Vp
42.5217 143.0696 10.0 2824.6 6.57 Vp
42.5934 142.9956 10.0 3545.3 6.18 Vp
42.6650 142.9214 10.0 1676.4 6.28 Vp
42.7367 142.8471 10.0 3596.3 7.13 Vp
42.8082 142.7726 10.0 2182.8 6.72 Vp
42.8798 142.6980 10.0 830.0 6.81 Vp
42.9512 142.6232 10.0 704.7 6.59 Vp
43.0227 142.5481 10.0 411.9 6.09 Vp
43.0941 142.4729 10.0 63.5 5.55 Vp
43.1654 142.3976 10.0 133.4 5.69 Vp
43.2367 142.3221 10.0 118.9 5.66 Vp
43.3079 142.2464 10.0 37.8 5.34 Vp
43.3790 142.1705 10.0 11.8 5.47 Vp
43.4502 142.0944 10.0 0.0 5.52 Vp
43.5212 142.0182 10.0 0.0 5.44 Vp
42.1174 143.5584 10.0 0.0 6.02 Vp
42.1895 143.4854 10.0 0.0 6.02 Vp
42.2614 143.4124 10.0 2.4 5.92 Vp
42.3334 143.3391 10.0 599.3 6.16 Vp
42.4052 143.2657 10.0 497.7 5.66 Vp
42.4771 143.1920 10.0 2271.6 5.87 Vp
42.5489 143.1183 10.0 2696.1 6.23 Vp
42.6206 143.0443 10.0 2745.9 5.48 Vp
42.6923 142.9702 10.0 2343.7 5.93 Vp
42.7640 142.8959 10.0 2880.1 5.96 Vp
42.8356 142.8214 10.0 4065.7 6.38 Vp
42.9071 142.7468 10.0 1127.4 7.30 Vp
42.9787 142.6720 10.0 1807.4 5.77 Vp
43.0501 142.5970 10.0 1903.8 6.54 Vp
43.1215 142.5218 10.0 826.0 5.83 Vp
43.1929 142.4465 10.0 87.3 5.42 Vp
43.2642 142.3710 10.0 400.7 6.20 Vp
43.3354 142.2953 10.0 290.5 5.65 Vp
43.4066 142.2195 10.0 10.2 5.47 Vp
43.4778 142.1434 10.0 0.0 5.65 Vp
43.5489 142.0672 10.0 0.0 5.43 Vp
42.1445 143.6069 10.0 0.0 6.02 Vp
42.2165 143.5341 10.0 0.0 6.02 Vp
42.2885 143.4610 10.0 0.0 5.99 Vp
42.3605 143.3877 10.0 39.9 5.54 Vp
42.4324 143.3143 10.0 56.8 4.64 Vp
42.5042 143.2408 10.0 951.9 5.56 Vp
42.5761 143.1670 10.0 1056.4 5.55 Vp
42.6479 143.0931 10.0 2781.2 5.80 Vp
42.7196 143.0190 10.0 1800.3 4.99 Vp
42.7913 142.9447 10.0 509.1 5.21 Vp
42.8629 142.8703 10.0 4555.9 5.67 Vp
42.9345 142.7956 10.0 1073.5 5.77 Vp
43.0060 142.7209 10.0 1760.5 5.80 Vp
43.0775 142.6459 10.0 1752.3 5.93 Vp
43.1490 142.5708 10.0 1795.8 6.62 Vp
43.2204 142.4955 10.0 222.2 5.38 Vp
43.2917 142.4200 10.0 711.3 6.12 Vp
43.3630 142.3443 10.0 1170.5 6.69 Vp
43.4342 142.2685 10.0 20.1 5.63 Vp
43.5054 142.1924 10.0 0.0 5.37 Vp
43.5765 142.1163 10.0 0.0 5.41 Vp
42.1715 143.6556 10.0 0.0 6.02 Vp
42.2435 143.5827 10.0 0.0 6.02 Vp
42.3156 143.5097 10.0 0.0 5.98 Vp
42.3876 143.4364 10.0 30.2 5.77 Vp
42.4595 143.3631 10.0 51.4 4.08 Vp
42.5314 143.2895 10.0 2025.2 5.94 Vp
42.6033 143.2158 10.0 1602.5 5.98 Vp
42.6751 143.1419 10.0 1367.2 5.79 Vp
42.7468 143.0678 10.0 603.3 5.06 Vp
42.8185 142.9935 10.0 1343.9 5.58 Vp
42.8902 142.9191 10.0 3457.5 6.29 Vp
42.9618 142.8445 10.0 595.1 6.02 Vp
43.0334 142.7698 10.0 1417.8 5.93 Vp
43.1049 142.6948 10.0 1889.1 5.40 Vp
43.1764 142.6197 10.0 988.8 6.17 Vp
43.2478 142.5444 10.0 268.1 5.93 Vp
43.3192 142.4690 10.0 391.9 5.71 Vp
43.3905 142.3933 10.0 502.4 5.36 Vp
43.4618 142.3175 10.0 181.3 5.29 Vp
43.5330 142.2415 10.0 0.0 5.47 Vp
43.6041 142.1654 10.0 0.0 5.34 Vp
42.1984 143.7042 10.0 0.0 6.02 Vp
42.2705 143.6314 10.0 0.0 6.02 Vp
42.3426 143.5584 10.0 0.0 6.02 Vp
42.4146 143.4852 10.0 21.7 6.01 Vp
42.4866 143.4118 10.0 62.9 4.20 Vp
42.5585 143.3383 10.0 4413.9 6.03 Vp
42.6304 143.2646 10.0 4148.8 5.82 Vp
42.7023 143.1907 10.0 145.6 4.12 Vp
42.7740 143.1167 10.0 150.7 4.95 Vp
42.8458 143.0424 10.0 1430.7 5.09 Vp
42.9175 142.9680 10.0 566.9 5.11 Vp
42.9891 142.8935 10.0 337.8 5.52 Vp
43.0607 142.8187 10.0 1336.5 6.29 Vp
43.1323 142.7438 10.0 1815.2 6.32 Vp
43.2038 142.6687 10.0 775.5 6.22 Vp
43.2753 142.5935 10.0 1169.6 6.49 Vp
43.3467 142.5180 10.0 1108.4 6.28 Vp
43.4180 142.4424 10.0 344.8 5.36 Vp
43.4893 142.3666 10.0 259.1 5.13 Vp
43.5605 142.2907 10.0 0.0 5.69 Vp
43.6317 142.2145 10.0 0.0 5.81 Vp
42.2254 143.7529 10.0 0.0 6.02 Vp
42.2975 143.6801 10.0 0.0 6.02 Vp
42.3696 143.6071 10.0 0.0 6.02 Vp
42.4417 143.5340 10.0 10.9 5.99 Vp
42.5137 143.4606 10.0 52.8 4.40 Vp
42.5856 143.3871 10.0 3577.0 5.00 Vp
42.6575 143.3134 10.0 4929.7 5.39 Vp
42.7294 143.2396 10.0 179.3 3.84 Vp
42.8012 143.1656 10.0 177.3 4.77 Vp
42.8730 143.0914 10.0 1537.8 5.44 Vp
42.9448 143.0170 10.0 284.8 4.81 Vp
43.0164 142.9425 10.0 245.5 5.16 Vp
43.0881 142.8677 10.0 2978.8 6.10 Vp
43.1597 142.7928 10.0 1046.5 5.43 Vp
43.2312 142.7178 10.0 295.4 5.96 Vp
43.3027 142.6425 10.0 626.1 5.54 Vp
43.3741 142.5671 10.0 920.5 5.68 Vp
43.4455 142.4915 10.0 474.5 5.45 Vp
43.5168 142.4158 10.0 368.5 5.78 Vp
43.5881 142.3398 10.0 0.0 5.83 Vp
43.6593 142.2637 10.0 0.0 5.76 Vp
42.2523 143.8017 10.0 0.0 6.02 Vp
42.3245 143.7289 10.0 0.0 6.02 Vp
42.3966 143.6559 10.0 0.0 6.02 Vp
42.4687 143.5828 10.0 1.7 6.02 Vp
42.5407 143.5095 10.0 30.7 5.31 Vp
42.6127 143.4360 10.0 951.9 4.93 Vp
42.6847 143.3623 10.0 1170.4 5.17 Vp
42.7566 143.2885 10.0 225.9 4.17 Vp
42.8284 143.2145 10.0 123.6 4.54 Vp
42.9002 143.1403 10.0 527.1 5.68 Vp
42.9720 143.0660 10.0 138.5 5.19 Vp
43.0437 142.9915 10.0 122.6 5.27 Vp
43.1154 142.9168 10.0 3064.5 6.48 Vp
43.1870 142.8419 10.0 1786.1 5.71 Vp
43.2585 142.7669 10.0 329.2 5.59 Vp
43.3301 142.6917 10.0 215.6 5.69 Vp
43.4015 142.6163 10.0 366.5 5.71 Vp
43.4729 142.5407 10.0 269.5 5.72 Vp
43.5443 142.4650 10.0 41.2 5.69 Vp
43.6156 142.3891 10.0 0.0 5.98 Vp
43.6869 142.3129 10.0 0.0 6.01 Vp
42.2792 143.8504 10.0 0.0 6.02 Vp
42.3514 143.7777 10.0 0.0 6.02 Vp
42.4236 143.7047 10.0 0.0 6.02 Vp
42.4957 143.6316 10.0 0.6 6.02 Vp
42.5677 143.5583 10.0 35.3 5.79 Vp
42.6398 143.4849 10.0 185.1 4.44 Vp
42.7118 143.4113 10.0 198.9 5.25 Vp
42.7837 143.3375 10.0 123.6 4.84 Vp
42.8556 143.2635 10.0 314.4 4.68 Vp
42.9274 143.1894 10.0 87.0 5.01 Vp
42.9992 143.1150 10.0 159.6 5.06 Vp
43.0710 143.0405 10.0 252.4 5.53 Vp
43.1426 142.9659 10.0 3646.6 6.23 Vp
43.2143 142.8910 10.0 3890.3 6.48 Vp
43.2859 142.8160 10.0 521.1 5.66 Vp
43.3574 142.7408 10.0 120.3 5.52 Vp
43.4289 142.6655 10.0 266.4 5.66 Vp
43.5004 142.5899 10.0 526.8 6.16 Vp
43.5718 142.5142 10.0 0.7 5.97 Vp
43.6431 142.4383 10.0 0.0 5.98 Vp
43.7144 142.3622 10.0 0.0 6.00 Vp
42.3061 143.8993 10.0 0.0 6.02 Vp
42.3783 143.8265 10.0 0.0 6.02 Vp
42.4505 143.7536 10.0 0.0 6.02 Vp
42.5227 143.6805 10.0 0.4 6.02 Vp
42.5948 143.6073 10.0 13.1 6.02 Vp
42.6668 143.5338 10.0 75.6 4.66 Vp
42.7388 143.4602 10.0 1087.1 5.28 Vp
42.8108 143.3865 10.0 419.5 4.73 Vp
42.8827 143.3125 10.0 106.0 4.65 Vp
42.9546 143.2384 10.0 72.8 4.79 Vp
43.0264 143.1641 10.0 82.7 5.02 Vp
43.0982 143.0896 10.0 171.9 6.07 Vp
43.1699 143.0150 10.0 2039.0 6.22 Vp
43.2416 142.9402 10.0 2791.1 5.63 Vp
43.3132 142.8652 10.0 549.2 5.64 Vp
43.3848 142.7900 10.0 103.7 5.64 Vp
43.4563 142.7147 10.0 41.5 5.61 Vp
43.5278 142.6392 10.0 36.9 5.77 Vp
43.5992 142.5635 10.0 0.4 6.02 Vp
43.6706 142.4876 10.0 0.0 6.02 Vp
43.7419 142.4115 10.0 0.0 6.02 Vp
42.3330 143.9481 10.0 0.0 6.02 Vp
42.4052 143.8754 10.0 0.0 6.02 Vp
42.4774 143.8025 10.0 0.0 6.02 Vp
42.5496 143.7295 10.0 0.2 6.02 Vp
42.6217 143.6562 10.0 19.7 6.02 Vp
42.6938 143.5828 10.0 141.0 4.90 Vp
42.7659 143.5093 10.0 1466.0 5.33 Vp
42.8379 143.4355 10.0 867.8 4.77 Vp
42.9098 143.3616 10.0 30.3 5.34 Vp
42.9817 143.2875 10.0 57.5 4.90 Vp
43.0536 143.2132 10.0 172.3 4.93 Vp
43.1254 143.1388 10.0 218.6 6.08 Vp
43.1971 143.0642 10.0 3124.3 6.72 Vp
43.2689 142.9894 10.0 1265.5 5.95 Vp
43.3405 142.9144 10.0 473.7 5.86 Vp
43.4121 142.8393 10.0 70.1 5.92 Vp
43.4837 142.7640 10.0 24.8 5.93 Vp
43.5552 142.6885 10.0 5.0 5.98 Vp
43.6266 142.6128 10.0 0.7 6.01 Vp
43.6980 142.5370 10.0 0.0 6.02 Vp
43.7694 142.4609 10.0 0.0 6.02 Vp
42.3598 143.9970 10.0 0.0 6.02 Vp
42.4321 143.9243 10.0 0.0 6.02 Vp
42.5043 143.8515 10.0 0.0 6.02 Vp
42.5766 143.7785 10.0 0.1 6.02 Vp
42.6487 143.7053 10.0 18.2 6.02 Vp
42.7208 143.6319 10.0 207.9 4.54 Vp
42.7929 143.5583 10.0 844.0 4.90 Vp
42.8649 143.4846 10.0 609.9 4.82 Vp
42.9369 143.4107 10.0 104.7 5.48 Vp
43.0088 143.3366 10.0 283.8 5.20 Vp
43.0807 143.2624 10.0 272.2 4.99 Vp
43.1526 143.1880 10.0 105.3 5.77 Vp
43.2244 143.1134 10.0 631.6 5.79 Vp
43.2961 143.0386 10.0 745.2 6.06 Vp
43.3678 142.9637 10.0 354.6 5.91 Vp
43.4394 142.8886 10.0 46.3 6.02 Vp
43.5110 142.8133 10.0 7.5 5.94 Vp
43.5826 142.7378 10.0 4.0 6.02 Vp
43.6540 142.6622 10.0 1.0 5.94 Vp
43.7255 142.5863 10.0 0.0 5.94 Vp
43.7968 142.5103 10.0 0.0 5.94 Vp
42.3866 144.0460 10.0 0.0 6.02 Vp
42.4590 143.9733 10.0 0.0 6.02 Vp
42.5312 143.9005 10.0 0.0 6.02 Vp
42.6035 143.8275 10.0 0.0 6.02 Vp
42.6757 143.7543 10.0 10.4 6.02 Vp
42.7478 143.6810 10.0 210.9 4.76 Vp
42.8199 143.6074 10.0 942.4 5.31 Vp
42.8920 143.5338 10.0 1614.6 5.37 Vp
42.9640 143.4599 10.0 264.8 5.51 Vp
43.0359 143.3858 10.0 556.9 5.45 Vp
43.1079 143.3116 10.0 133.6 5.18 Vp
43.1797 143.2372 10.0 239.2 5.66 Vp
43.2516 143.1627 10.0 235.5 5.62 Vp
43.3233 143.0879 10.0 651.6 5.30 Vp
43.3950 143.0130 10.0 371.2 5.10 Vp
43.4667 142.9379 10.0 43.0 5.68 Vp
43.5383 142.8626 10.0 6.4 5.94 Vp
43.6099 142.7872 10.0 5.6 5.94 Vp
43.6814 142.7116 10.0 2.3 5.94 Vp
43.7529 142.6358 10.0 0.0 5.94 Vp
43.8243 142.5598 10.0 0.0 5.94 Vp
42.4402 144.1440 10.0 0.0 6.02 Vp
42.5126 144.0714 10.0 0.0 6.02 Vp
42.5849 143.9986 10.0 0.0 6.02 Vp
42.6572 143.9257 10.0 0.0 6.02 Vp
42.7295 143.8525 10.0 1.7 6.02 Vp
42.8017 143.7792 10.0 974.9 4.80 Vp
42.8739 143.7058 10.0 6137.4 5.09 Vp
42.9460 143.6321 10.0 5567.5 5.81 Vp
43.0181 143.5583 10.0 1555.9 5.73 Vp
43.0901 143.4843 10.0 878.5 4.98 Vp
43.1621 143.4102 10.0 1238.9 5.26 Vp
43.2340 143.3358 10.0 1793.2 5.81 Vp
43.3059 143.2613 10.0 300.5 5.80 Vp
43.3777 143.1866 10.0 2320.9 6.04 Vp
43.4495 143.1118 10.0 1858.0 5.68 Vp
43.5212 143.0367 10.0 31.0 5.84 Vp
43.5929 142.9615 10.0 18.2 5.94 Vp
43.6645 142.8861 10.0 7.2 5.94 Vp
43.7361 142.8105 10.0 4.5 5.94 Vp
43.8076 142.7348 10.0 0.0 5.94 Vp
43.8791 142.6588 10.0 0.0 5.94 Vp
42.4937 144.2422 10.0 0.0 5.94 Vp
42.5662 144.1696 10.0 0.0 5.94 Vp
42.6386 144.0969 10.0 0.0 5.94 Vp
42.7109 144.0240 10.0 0.0 5.94 Vp
42.7832 143.9509 10.0 0.1 5.94 Vp
42.8555 143.8777 10.0 1584.1 5.06 Vp
42.9277 143.8043 10.0 5431.4 5.28 Vp
42.9999 143.7307 10.0 351.0 5.31 Vp
43.0720 143.6569 10.0 1550.1 5.25 Vp
43.1441 143.5830 10.0 1643.8 5.44 Vp
43.2162 143.5089 10.0 1327.9 5.35 Vp
43.2882 143.4346 10.0 2154.7 5.92 Vp
43.3601 143.3601 10.0 178.5 6.03 Vp
43.4320 143.2855 10.0 233.1 6.13 Vp
43.5038 143.2107 10.0 186.0 6.02 Vp
43.5756 143.1357 10.0 8.5 5.94 Vp
43.6474 143.0605 10.0 32.5 5.70 Vp
43.7191 142.9852 10.0 42.2 5.34 Vp
43.7907 142.9097 10.0 26.0 5.94 Vp
43.8623 142.8339 10.0 0.0 5.94 Vp
43.9338 142.7581 10.0 0.0 5.94 Vp
42.5471 144.3405 10.0 0.0 5.94 Vp
42.6196 144.2680 10.0 0.0 5.94 Vp
42.6921 144.1953 10.0 0.0 5.94 Vp
42.7645 144.1225 10.0 0.0 5.94 Vp
42.8369 144.0495 10.0 0.0 5.94 Vp
42.9092 143.9763 10.0 1132.1 5.01 Vp
42.9815 143.9030 10.0 1911.4 4.68 Vp
43.0537 143.8294 10.0 815.3 5.67 Vp
43.1259 143.7557 10.0 920.9 5.49 Vp
43.1981 143.6818 10.0 4235.7 6.16 Vp
43.2702 143.6078 10.0 1676.6 5.55 Vp
43.3422 143.5335 10.0 212.3 5.94 Vp
43.4142 143.4591 10.0 118.0 5.76 Vp
43.4862 143.3845 10.0 58.4 5.91 Vp
43.5581 143.3098 10.0 37.5 5.83 Vp
43.6300 143.2348 10.0 13.5 5.94 Vp
43.7018 143.1597 10.0 62.8 5.65 Vp
43.7735 143.0844 10.0 545.4 5.54 Vp
43.8452 143.0089 10.0 163.8 5.74 Vp
43.9169 142.9333 10.0 0.0 5.94 Vp
43.9885 142.8575 10.0 0.0 5.94 Vp
42.6004 144.4390 10.0 0.0 5.94 Vp
42.6730 144.3666 10.0 0.0 5.94 Vp
42.7455 144.2939 10.0 0.0 5.94 Vp
42.8180 144.2212 10.0 0.0 5.94 Vp
42.8904 144.1482 10.0 0.0 5.94 Vp
42.9628 144.0751 10.0 394.4 5.28 Vp
43.0352 144.0018 10.0 766.1 5.26 Vp
43.1075 143.9283 10.0 1651.8 5.84 Vp
43.1797 143.8546 10.0 2235.8 5.64 Vp
43.2520 143.7808 10.0 5681.2 5.84 Vp
43.3241 143.7068 10.0 3224.9 5.53 Vp
43.3962 143.6326 10.0 1507.2 6.32 Vp
43.4683 143.5583 10.0 266.3 5.43 Vp
43.5403 143.4837 10.0 937.4 6.36 Vp
43.6123 143.4090 10.0 377.7 5.59 Vp
43.6842 143.3342 10.0 24.9 5.94 Vp
43.7561 143.2591 10.0 20.3 5.94 Vp
43.8279 143.1839 10.0 267.5 6.21 Vp
43.8997 143.1084 10.0 47.1 6.28 Vp
43.9714 143.0328 10.0 0.0 5.94 Vp
44.0430 142.9570 10.0 0.0 5.94 Vp
42.6537 144.5376 10.0 0.0 5.94 Vp
42.7263 144.4653 10.0 0.0 5.94 Vp
42.7989 144.3927 10.0 0.0 5.94 Vp
42.8714 144.3200 10.0 0.0 5.94 Vp
42.9439 144.2471 10.0 0.0 5.94 Vp
43.0164 144.1740 10.0 0.0 5.94 Vp
43.0888 144.1008 10.0 0.0 5.94 Vp
43.1611 144.0274 10.0 11.7 5.94 Vp
43.2335 143.9538 10.0 34.7 5.90 Vp
43.3057 143.8800 10.0 42.0 5.64 Vp
43.3780 143.8060 10.0 54.1 5.65 Vp
43.4501 143.7319 10.0 697.6 6.08 Vp
43.5223 143.6576 10.0 131.8 5.68 Vp
43.5943 143.5831 10.0 475.7 6.74 Vp
43.6664 143.5085 10.0 272.6 6.07 Vp
43.7384 143.4336 10.0 1.7 5.94 Vp
43.8103 143.3586 10.0 0.1 5.94 Vp
43.8822 143.2834 10.0 0.0 5.94 Vp
43.9540 143.2081 10.0 0.0 5.94 Vp
44.0258 143.1325 10.0 0.0 5.94 Vp
44.0975 143.0568 10.0 0.0 5.94 Vp
41.0194 141.6484 15.0 0.0 6.22 Vp
41.0902 141.5745 15.0 0.0 6.42 Vp
41.1610 141.5005 15.0 0.0 6.61 Vp
41.2317 141.4263 15.0 0.0 6.81 Vp
41.3024 141.3519 15.0 5.8 6.58 Vp
41.3730 141.2774 15.0 2.6 6.82 Vp
41.4436 141.2027 15.0 0.0 6.69 Vp
41.5141 141.1278 15.0 0.0 6.38 Vp
41.5846 141.0528 15.0 0.0 6.32 Vp
41.6551 140.9776 15.0 0.0 6.28 Vp
41.7255 140.9023 15.0 0.0 6.17 Vp
41.7958 140.8268 15.0 0.0 5.98 Vp
41.8661 140.7511 15.0 0.0 5.74 Vp
41.9364 140.6752 15.0 0.0 5.80 Vp
42.0065 140.5992 15.0 0.0 5.79 Vp
42.0767 140.5230 15.0 0.0 6.14 Vp
42.1468 140.4467 15.0 0.0 6.25 Vp
42.2168 140.3702 15.0 0.0 6.03 Vp
42.2868 140.2935 15.0 0.0 6.06 Vp
42.3567 140.2166 15.0 0.0 6.12 Vp
42.4266 140.1396 15.0 0.0 6.05 Vp
41.0750 141.7424 15.0 0.0 6.22 Vp
41.1459 141.6685 15.0 0.0 6.33 Vp
41.2167 141.5945 15.0 0.0 6.72 Vp
41.2875 141.5204 15.0 0.0 6.66 Vp
41.3582 141.4460 15.0 358.3 6.62 Vp
41.4289 141.3716 15.0 768.8 6.81 Vp
41.4996 141.2969 15.0 22.8 6.75 Vp
41.5702 141.2221 15.0 0.9 6.32 Vp
41.6408 141.1471 15.0 0.0 6.28 Vp
41.7113 141.0719 15.0 0.0 6.24 Vp
41.7817 140.9966 15.0 11.5 6.12 Vp
41.8521 140.9211 15.0 7.6 5.85 Vp
41.9225 140.8455 15.0 1.4 5.88 Vp
41.9928 140.7697 15.0 3.0 5.81 Vp
42.0630 140.6937 15.0 5.9 6.17 Vp
42.1333 140.6175 15.0 0.3 6.26 Vp
42.2034 140.5412 15.0 0.0 6.35 Vp
42.2735 140.4648 15.0 0.0 6.23 Vp
42.3436 140.3881 15.0 0.0 6.13 Vp
42.4136 140.3113 15.0 0.0 6.02 Vp
42.4835 140.2343 15.0 0.0 6.01 Vp
41.1305 141.8365 15.0 0.0 6.22 Vp
41.2015 141.7627 15.0 0.0 6.22 Vp
41.2724 141.6888 15.0 0.0 6.59 Vp
41.3432 141.6146 15.0 0.5 6.80 Vp
41.4140 141.5403 15.0 1314.1 6.33 Vp
41.4848 141.4659 15.0 1481.8 6.66 Vp
41.5555 141.3913 15.0 65.0 6.60 Vp
41.6262 141.3165 15.0 4.8 6.23 Vp
41.6968 141.2415 15.0 6.3 6.24 Vp
41.7674 141.1664 15.0 35.8 6.41 Vp
41.8379 141.0911 15.0 1043.4 6.45 Vp
41.9084 141.0157 15.0 950.4 6.08 Vp
41.9788 140.9401 15.0 40.0 6.31 Vp
42.0492 140.8643 15.0 17.8 6.47 Vp
42.1195 140.7884 15.0 11.2 6.34 Vp
42.1898 140.7122 15.0 0.2 6.32 Vp
42.2600 140.6360 15.0 0.0 6.30 Vp
42.3301 140.5595 15.0 0.0 6.21 Vp
42.4002 140.4829 15.0 0.0 6.17 Vp
42.4703 140.4061 15.0 0.0 6.05 Vp
42.5403 140.3291 15.0 0.0 6.19 Vp
41.1860 141.9308 15.0 0.0 6.22 Vp
41.2570 141.8571 15.0 0.0 6.22 Vp
41.3280 141.7831 15.0 0.0 6.47 Vp
41.3989 141.7091 15.0 0.0 6.23 Vp
41.4697 141.6348 15.0 396.0 6.25 Vp
41.5406 141.5604 15.0 249.3 6.38 Vp
41.6114 141.4858 15.0 0.3 6.37 Vp
41.6821 141.4111 15.0 0.0 6.22 Vp
41.7528 141.3362 15.0 1.2 6.22 Vp
41.8234 141.2611 15.0 200.5 6.44 Vp
41.8940 141.1858 15.0 6703.4 6.75 Vp
41.9645 141.1104 15.0 5187.5 6.50 Vp
42.0350 141.0348 15.0 99.7 6.48 Vp
42.1054 140.9591 15.0 19.7 6.48 Vp
42.1758 140.8832 15.0 14.2 6.37 Vp
42.2462 140.8071 15.0 0.1 6.36 Vp
42.3165 140.7309 15.0 0.0 6.30 Vp
42.3867 140.6544 15.0 0.0 6.19 Vp
42.4569 140.5779 15.0 0.0 6.38 Vp
42.5270 140.5011 15.0 0.0 6.29 Vp
42.5970 140.4242 15.0 0.0 6.27 Vp
41.2414 142.0253 15.0 0.0 6.22 Vp
41.3125 141.9516 15.0 0.0 6.22 Vp
41.3835 141.8777 15.0 0.0 6.22 Vp
41.4545 141.8036 15.0 0.0 6.22 Vp
41.5254 141.7294 15.0 0.0 6.22 Vp
41.5963 141.6551 15.0 0.0 6.22 Vp
41.6671 141.5805 15.0 0.0 6.22 Vp
41.7379 141.5058 15.0 0.0 6.22 Vp
41.8087 141.4309 15.0 0.0 6.22 Vp
41.8794 141.3559 15.0 76.9 6.38 Vp
41.9500 141.2807 15.0 2704.8 6.72 Vp
42.0206 141.2053 15.0 1177.5 6.60 Vp
42.0912 141.1298 15.0 67.3 6.51 Vp
42.1617 141.0541 15.0 26.8 6.28 Vp
42.2321 140.9782 15.0 47.2 6.35 Vp
42.3025 140.9021 15.0 31.5 6.40 Vp
42.3729 140.8259 15.0 12.0 6.39 Vp
42.4432 140.7495 15.0 0.4 6.53 Vp
42.5134 140.6730 15.0 0.0 6.62 Vp
42.5836 140.5963 15.0 0.0 6.44 Vp
42.6537 140.5194 15.0 0.0 6.16 Vp
41.2967 142.1199 15.0 0.0 6.22 Vp
41.3678 142.0463 15.0 0.0 6.22 Vp
41.4389 141.9724 15.0 0.0 6.22 Vp
41.5100 141.8984 15.0 0.0 6.22 Vp
41.5810 141.8242 15.0 0.0 6.22 Vp
41.6519 141.7499 15.0 0.0 6.22 Vp
41.7228 141.6754 15.0 0.0 6.22 Vp
41.7937 141.6007 15.0 0.0 6.22 Vp
41.8645 141.5259 15.0 0.0 6.22 Vp
41.9352 141.4509 15.0 1.1 6.38 Vp
42.0060 141.3757 15.0 96.7 6.56 Vp
42.0766 141.3004 15.0 105.8 6.51 Vp
42.1472 141.2249 15.0 23.3 6.24 Vp
42.2178 141.1492 15.0 15.3 6.33 Vp
42.2883 141.0734 15.0 181.3 6.53 Vp
42.3588 140.9974 15.0 309.2 6.52 Vp
42.4292 140.9212 15.0 60.6 6.53 Vp
42.4996 140.8448 15.0 22.1 6.49 Vp
42.5699 140.7683 15.0 1.5 6.51 Vp
42.6401 140.6916 15.0 0.0 6.37 Vp
42.7103 140.6148 15.0 0.0 6.08 Vp
41.3519 142.2148 15.0 0.0 6.22 Vp
41.4231 142.1411 15.0 0.0 6.22 Vp
41.4943 142.0673 15.0 0.0 6.22 Vp
41.5654 141.9933 15.0 0.0 6.22 Vp
41.6365 141.9192 15.0 0.0 6.22 Vp
41.7075 141.8449 15.0 0.0 6.22 Vp
41.7784 141.7704 15.0 0.0 6.22 Vp
41.8494 141.6958 15.0 0.0 6.22 Vp
41.9202 141.6210 15.0 0.0 6.22 Vp
41.9911 141.5461 15.0 1.2 6.32 Vp
42.0618 141.4709 15.0 22.9 6.47 Vp
42.1326 141.3956 15.0 32.7 6.25 Vp
42.2032 141.3202 15.0 5.2 6.22 Vp
42.2739 141.2445 15.0 3.7 6.39 Vp
42.3445 141.1687 15.0 1004.0 6.80 Vp
42.4150 141.0927 15.0 2385.1 6.79 Vp
42.4855 141.0166 15.0 722.8 6.82 Vp
42.5559 140.9403 15.0 12.6 6.31 Vp
42.6262 140.8638 15.0 0.9 6.26 Vp
42.6966 140.7872 15.0 0.0 6.22 Vp
42.7668 140.7103 15.0 0.0 6.14 Vp
41.4071 142.3097 15.0 0.0 6.22 Vp
41.4784 142.2361 15.0 0.0 6.22 Vp
41.5496 142.1624 15.0 0.0 6.22 Vp
41.6207 142.0884 15.0 0.0 6.22 Vp
41.6919 142.0143 15.0 0.0 6.22 Vp
41.7629 141.9401 15.0 0.0 6.22 Vp
41.8340 141.8657 15.0 0.0 6.22 Vp
41.9050 141.7911 15.0 0.0 6.22 Vp
41.9759 141.7163 15.0 0.0 6.22 Vp
42.0468 141.6414 15.0 0.0 6.22 Vp
42.1176 141.5663 15.0 1.0 6.22 Vp
42.1884 141.4910 15.0 10.4 6.22 Vp
42.2592 141.4156 15.0 4.0 6.22 Vp
42.3299 141.3400 15.0 6.4 6.40 Vp
42.4005 141.2642 15.0 1917.5 6.81 Vp
42.4711 141.1883 15.0 3851.0 6.86 Vp
42.5416 141.1122 15.0 779.2 6.39 Vp
42.6121 141.0359 15.0 284.4 6.19 Vp
42.6826 140.9595 15.0 164.5 6.11 Vp
42.7529 140.8829 15.0 38.3 6.15 Vp
42.8233 140.8061 15.0 0.0 6.19 Vp
41.4622 142.4049 15.0 0.0 6.22 Vp
41.5335 142.3313 15.0 0.0 6.22 Vp
41.6048 142.2576 15.0 0.0 6.22 Vp
41.6760 142.1837 15.0 0.0 6.22 Vp
41.7472 142.1096 15.0 0.0 6.22 Vp
41.8183 142.0354 15.0 0.0 6.22 Vp
41.8894 141.9611 15.0 0.0 6.22 Vp
41.9605 141.8865 15.0 0.0 6.22 Vp
42.0315 141.8118 15.0 0.0 6.22 Vp
42.1025 141.7369 15.0 0.0 6.22 Vp
42.1734 141.6618 15.0 0.0 6.22 Vp
42.2442 141.5866 15.0 4.4 6.22 Vp
42.3150 141.5112 15.0 5.5 6.24 Vp
42.3858 141.4357 15.0 26.0 6.33 Vp
42.4565 141.3599 15.0 553.9 6.57 Vp
42.5271 141.2840 15.0 665.0 6.26 Vp
42.5977 141.2080 15.0 756.1 6.48 Vp
42.6683 141.1317 15.0 921.3 6.36 Vp
42.7388 141.0553 15.0 617.5 6.20 Vp
42.8092 140.9788 15.0 170.0 6.17 Vp
42.8796 140.9020 15.0 0.0 6.43 Vp
41.5172 142.5002 15.0 0.0 6.22 Vp
41.5886 142.4267 15.0 0.0 6.22 Vp
41.6599 142.3530 15.0 0.0 6.22 Vp
41.7312 142.2791 15.0 0.0 6.22 Vp
41.8025 142.2051 15.0 0.0 6.22 Vp
41.8737 142.1310 15.0 0.0 6.22 Vp
41.9448 142.0566 15.0 0.0 6.22 Vp
42.0159 141.9821 15.0 0.0 6.22 Vp
42.0870 141.9074 15.0 0.0 6.22 Vp
42.1580 141.8326 15.0 0.0 6.22 Vp
42.2290 141.7576 15.0 0.0 6.22 Vp
42.2999 141.6824 15.0 2.9 6.22 Vp
42.3708 141.6070 15.0 6.4 6.24 Vp
42.4416 141.5315 15.0 176.2 6.26 Vp
42.5124 141.4558 15.0 873.6 6.23 Vp
42.5831 141.3800 15.0 526.9 6.31 Vp
42.6538 141.3039 15.0 263.1 6.38 Vp
42.7244 141.2277 15.0 517.5 6.37 Vp
42.7949 141.1514 15.0 351.0 6.35 Vp
42.8654 141.0748 15.0 24.8 6.42 Vp
42.9359 140.9981 15.0 0.0 6.27 Vp
41.5721 142.5956 15.0 0.0 6.22 Vp
41.6436 142.5222 15.0 0.0 6.22 Vp
41.7150 142.4485 15.0 0.0 6.22 Vp
41.7863 142.3747 15.0 0.0 6.22 Vp
41.8577 142.3008 15.0 0.0 6.22 Vp
41.9289 142.2266 15.0 0.0 6.22 Vp
42.0001 142.1523 15.0 0.0 6.22 Vp
42.0713 142.0779 15.0 0.0 6.22 Vp
42.1425 142.0032 15.0 0.0 6.22 Vp
42.2135 141.9284 15.0 2.6 6.22 Vp
42.2846 141.8535 15.0 3.7 6.22 Vp
42.3555 141.7783 15.0 5.9 6.22 Vp
42.4265 141.7030 15.0 7.0 6.13 Vp
42.4974 141.6275 15.0 87.8 6.21 Vp
42.5682 141.5519 15.0 347.1 6.29 Vp
42.6390 141.4761 15.0 219.7 6.24 Vp
42.7097 141.4001 15.0 346.4 6.16 Vp
42.7804 141.3239 15.0 67.0 6.18 Vp
42.8510 141.2476 15.0 14.3 6.25 Vp
42.9216 141.1711 15.0 3.5 6.10 Vp
42.9921 141.0944 15.0 0.0 6.12 Vp
41.6270 142.6913 15.0 0.0 6.22 Vp
41.6985 142.6178 15.0 0.0 6.22 Vp
41.7700 142.5443 15.0 0.0 6.22 Vp
41.8414 142.4705 15.0 0.0 6.22 Vp
41.9128 142.3966 15.0 0.0 6.22 Vp
41.9841 142.3225 15.0 0.0 6.22 Vp
42.0554 142.2482 15.0 1.6 6.22 Vp
42.1266 142.1738 15.0 9.6 6.22 Vp
42.1978 142.0992 15.0 17.1 6.18 Vp
42.2690 142.0245 15.0 41.8 5.94 Vp
42.3401 141.9495 15.0 66.5 5.71 Vp
42.4111 141.8744 15.0 80.5 5.97 Vp
42.4821 141.7991 15.0 99.0 6.16 Vp
42.5530 141.7237 15.0 112.2 6.18 Vp
42.6239 141.6481 15.0 103.2 6.12 Vp
42.6948 141.5723 15.0 782.3 6.06 Vp
42.7656 141.4964 15.0 2115.0 6.01 Vp
42.8363 141.4202 15.0 1110.0 6.18 Vp
42.9070 141.3439 15.0 33.4 6.13 Vp
42.9776 141.2675 15.0 2.5 6.28 Vp
43.0482 141.1908 15.0 0.0 6.13 Vp
41.6818 142.7871 15.0 0.0 6.22 Vp
41.7533 142.7137 15.0 0.0 6.22 Vp
41.8249 142.6401 15.0 0.0 6.22 Vp
41.8964 142.5664 15.0 0.0 6.22 Vp
41.9678 142.4926 15.0 0.0 6.10 Vp
42.0392 142.4185 15.0 0.0 6.03 Vp
42.1105 142.3443 15.0 16.4 5.98 Vp
42.1818 142.2699 15.0 80.2 5.47 Vp
42.2531 142.1954 15.0 99.6 5.38 Vp
42.3243 142.1207 15.0 88.4 4.98 Vp
42.3955 142.0458 15.0 278.4 4.83 Vp
42.4666 141.9707 15.0 712.8 5.55 Vp
42.5376 141.8955 15.0 1383.2 5.90 Vp
42.6086 141.8201 15.0 1902.7 6.16 Vp
42.6796 141.7445 15.0 261.9 5.72 Vp
42.7505 141.6688 15.0 607.7 5.62 Vp
42.8214 141.5928 15.0 1985.0 5.92 Vp
42.8922 141.5168 15.0 1346.3 5.54 Vp
42.9629 141.4405 15.0 362.0 5.84 Vp
43.0336 141.3641 15.0 0.5 6.13 Vp
43.1043 141.2875 15.0 0.0 6.19 Vp
41.7365 142.8830 15.0 0.0 6.22 Vp
41.8081 142.8097 15.0 0.0 6.22 Vp
41.8797 142.7362 15.0 0.0 6.21 Vp
41.9512 142.6625 15.0 29.5 6.22 Vp
42.0227 142.5887 15.0 44.7 6.06 Vp
42.0942 142.5147 15.0 10.3 5.88 Vp
42.1656 142.4405 15.0 68.5 5.42 Vp
42.2370 142.3662 15.0 218.5 5.02 Vp
42.3083 142.2917 15.0 400.1 5.11 Vp
42.3796 142.2170 15.0 218.2 4.90 Vp
42.4508 142.1422 15.0 1024.5 4.99 Vp
42.5220 142.0672 15.0 1017.4 5.21 Vp
42.5931 141.9920 15.0 1295.1 5.45 Vp
42.6642 141.9166 15.0 1572.2 5.29 Vp
42.7352 141.8411 15.0 482.0 6.21 Vp
42.8062 141.7654 15.0 1019.5 6.04 Vp
42.8771 141.6895 15.0 1087.6 6.19 Vp
42.9479 141.6135 15.0 657.6 5.96 Vp
43.0188 141.5372 15.0 178.2 6.13 Vp
43.0895 141.4609 15.0 0.3 5.99 Vp
43.1602 141.3843 15.0 0.0 6.14 Vp
41.7638 142.9311 15.0 0.0 6.22 Vp
41.8354 142.8578 15.0 0.0 6.17 Vp
41.9071 142.7843 15.0 0.0 6.08 Vp
41.9786 142.7106 15.0 77.3 5.73 Vp
42.0502 142.6368 15.0 111.1 5.39 Vp
42.1217 142.5629 15.0 134.5 5.99 Vp
42.1931 142.4887 15.0 385.9 5.42 Vp
42.2645 142.4144 15.0 385.1 4.96 Vp
42.3359 142.3399 15.0 743.9 5.13 Vp
42.4072 142.2653 15.0 348.8 5.21 Vp
42.4784 142.1904 15.0 1020.2 5.36 Vp
42.5496 142.1154 15.0 682.4 5.23 Vp
42.6208 142.0403 15.0 437.1 5.37 Vp
42.6919 141.9650 15.0 523.7 5.57 Vp
42.7629 141.8894 15.0 941.6 6.56 Vp
42.8340 141.8138 15.0 924.7 6.51 Vp
42.9049 141.7379 15.0 306.4 5.91 Vp
42.9758 141.6619 15.0 91.4 6.13 Vp
43.0466 141.5857 15.0 61.9 6.15 Vp
43.1174 141.5093 15.0 0.1 5.85 Vp
43.1882 141.4328 15.0 0.0 6.03 Vp
41.7911 142.9791 15.0 0.0 6.22 Vp
41.8628 142.9059 15.0 0.0 6.16 Vp
41.9344 142.8324 15.0 0.8 6.06 Vp
42.0060 142.7588 15.0 18.2 5.17 Vp
42.0776 142.6850 15.0 39.7 5.22 Vp
42.1491 142.6111 15.0 402.9 5.81 Vp
42.2206 142.5369 15.0 1138.1 5.55 Vp
42.2920 142.4626 15.0 557.0 4.97 Vp
42.3634 142.3882 15.0 700.9 5.05 Vp
42.4347 142.3136 15.0 377.4 5.23 Vp
42.5060 142.2387 15.0 594.0 5.53 Vp
42.5773 142.1638 15.0 553.9 5.33 Vp
42.6485 142.0886 15.0 604.3 5.56 Vp
42.7196 142.0133 15.0 621.6 5.48 Vp
42.7907 141.9378 15.0 1076.8 5.65 Vp
42.8617 141.8622 15.0 773.8 5.79 Vp
42.9327 141.7863 15.0 164.4 5.88 Vp
43.0036 141.7103 15.0 79.5 6.08 Vp
43.0745 141.6342 15.0 41.2 6.06 Vp
43.1453 141.5578 15.0 0.0 5.90 Vp
43.2161 141.4813 15.0 0.0 6.05 Vp
41.8184 143.0273 15.0 0.0 6.22 Vp
41.8901 142.9540 15.0 2.0 6.00 Vp
41.9618 142.8806 15.0 7.4 5.71 Vp
42.0334 142.8070 15.0 16.9 5.22 Vp
42.1050 142.7332 15.0 42.1 4.89 Vp
42.1766 142.6593 15.0 1427.2 6.78 Vp
42.2481 142.5852 15.0 3447.6 6.08 Vp
42.3195 142.5109 15.0 2413.6 5.98 Vp
42.3909 142.4365 15.0 808.7 5.30 Vp
42.4623 142.3619 15.0 401.5 5.37 Vp
42.5336 142.2871 15.0 547.8 5.24 Vp
42.6049 142.2121 15.0 726.4 5.24 Vp
42.6761 142.1370 15.0 672.9 5.50 Vp
42.7473 142.0617 15.0 711.8 5.46 Vp
42.8184 141.9863 15.0 853.5 5.58 Vp
42.8895 141.9106 15.0 250.5 5.54 Vp
42.9605 141.8348 15.0 548.3 6.11 Vp
43.0315 141.7589 15.0 234.7 6.05 Vp
43.1024 141.6827 15.0 18.9 5.85 Vp
43.1732 141.6064 15.0 0.0 5.93 Vp
43.2440 141.5299 15.0 0.0 6.06 Vp
41.8456 143.0754 15.0 0.0 6.11 Vp
41.9174 143.0022 15.0 164.9 5.95 Vp
41.9891 142.9288 15.0 189.1 5.44 Vp
42.0608 142.8552 15.0 33.9 4.98 Vp
42.1324 142.7815 15.0 169.5 5.00 Vp
42.2040 142.7076 15.0 1981.1 6.42 Vp
42.2755 142.6335 15.0 3614.4 5.38 Vp
42.3470 142.5593 15.0 3920.3 5.99 Vp
42.4185 142.4848 15.0 1925.6 5.58 Vp
42.4899 142.4103 15.0 934.3 5.28 Vp
42.5612 142.3355 15.0 664.9 4.91 Vp
42.6325 142.2606 15.0 858.1 5.27 Vp
42.7038 142.1855 15.0 743.4 5.42 Vp
42.7750 142.1102 15.0 579.5 5.55 Vp
42.8461 142.0348 15.0 323.6 5.09 Vp
42.9172 141.9592 15.0 278.9 5.47 Vp
42.9883 141.8834 15.0 811.8 5.80 Vp
43.0592 141.8074 15.0 829.4 5.87 Vp
43.1302 141.7313 15.0 10.4 5.86 Vp
43.2011 141.6549 15.0 0.0 5.97 Vp
43.2719 141.5785 15.0 0.0 6.08 Vp
41.8729 143.1236 15.0 0.0 6.09 Vp
41.9446 143.0504 15.0 553.3 5.70 Vp
42.0164 142.9771 15.0 869.2 5.67 Vp
42.0881 142.9035 15.0 742.0 5.84 Vp
42.1598 142.8298 15.0 1779.3 5.97 Vp
42.2314 142.7559 15.0 2985.2 6.19 Vp
42.3029 142.6819 15.0 3648.5 5.97 Vp
42.3745 142.6076 15.0 2830.6 5.96 Vp
42.4459 142.5332 15.0 3514.0 5.89 Vp
42.5174 142.4587 15.0 4704.6 6.32 Vp
42.5888 142.3839 15.0 3077.8 5.91 Vp
42.6601 142.3090 15.0 1280.3 5.06 Vp
42.7314 142.2339 15.0 986.1 5.28 Vp
42.8026 142.1587 15.0 1039.5 5.26 Vp
42.8738 142.0833 15.0 729.2 5.36 Vp
42.9449 142.0077 15.0 756.5 5.73 Vp
43.0160 141.9319 15.0 550.6 5.60 Vp
43.0870 141.8560 15.0 387.0 5.89 Vp
43.1580 141.7799 15.0 44.8 6.16 Vp
43.2289 141.7036 15.0 0.0 6.14 Vp
43.2998 141.6271 15.0 0.0 6.21 Vp
41.9001 143.1719 15.0 0.0 5.96 Vp
41.9719 143.0987 15.0 414.4 5.67 Vp
42.0437 143.0253 15.0 1624.0 5.69 Vp
42.1154 142.9518 15.0 1881.9 6.52 Vp
42.1871 142.8781 15.0 4192.7 5.76 Vp
42.2588 142.8043 15.0 2857.2 5.31 Vp
42.3304 142.7302 15.0 2024.3 5.76 Vp
42.4019 142.6560 15.0 1492.4 5.64 Vp
42.4734 142.5817 15.0 1696.8 5.73 Vp
42.5449 142.5071 15.0 3987.0 6.02 Vp
42.6163 142.4324 15.0 4539.4 6.24 Vp
42.6877 142.3575 15.0 1933.8 5.81 Vp
42.7590 142.2825 15.0 928.8 5.12 Vp
42.8302 142.2073 15.0 1200.9 5.81 Vp
42.9014 142.1319 15.0 1326.3 5.61 Vp
42.9726 142.0563 15.0 688.2 5.76 Vp
43.0437 141.9805 15.0 209.6 5.47 Vp
43.1148 141.9046 15.0 815.1 5.82 Vp
43.1858 141.8285 15.0 553.6 6.26 Vp
43.2567 141.7523 15.0 0.0 6.18 Vp
43.3276 141.6758 15.0 0.0 6.20 Vp
41.9273 143.2202 15.0 0.0 5.87 Vp
41.9991 143.1470 15.0 245.3 5.66 Vp
42.0709 143.0737 15.0 1307.6 5.60 Vp
42.1427 143.0002 15.0 527.5 5.45 Vp
42.2144 142.9265 15.0 1710.0 5.10 Vp
42.2861 142.8527 15.0 3523.2 6.19 Vp
42.3577 142.7787 15.0 3678.5 6.83 Vp
42.4293 142.7045 15.0 1839.4 6.11 Vp
42.5009 142.6302 15.0 950.3 5.80 Vp
42.5724 142.5556 15.0 1189.1 5.20 Vp
42.6438 142.4809 15.0 3478.2 5.89 Vp
42.7152 142.4061 15.0 4466.6 6.08 Vp
42.7865 142.3311 15.0 1307.3 5.24 Vp
42.8578 142.2558 15.0 273.7 5.26 Vp
42.9291 142.1805 15.0 254.0 5.45 Vp
43.0003 142.1049 15.0 214.0 5.68 Vp
43.0714 142.0292 15.0 127.2 5.38 Vp
43.1425 141.9533 15.0 638.2 5.65 Vp
43.2135 141.8772 15.0 759.5 6.01 Vp
43.2845 141.8010 15.0 0.0 6.19 Vp
43.3555 141.7245 15.0 0.0 6.31 Vp
41.9545 143.2685 15.0 0.0 5.94 Vp
42.0263 143.1954 15.0 307.7 5.68 Vp
42.0982 143.1221 15.0 992.7 5.58 Vp
42.1700 143.0486 15.0 503.2 5.81 Vp
42.2417 142.9749 15.0 2805.6 5.92 Vp
42.3134 142.9011 15.0 2896.6 6.26 Vp
42.3851 142.8271 15.0 2816.3 6.43 Vp
42.4567 142.7530 15.0 1818.2 6.31 Vp
42.5283 142.6787 15.0 1770.6 6.01 Vp
42.5998 142.6042 15.0 695.8 5.64 Vp
42.6713 142.5295 15.0 600.6 5.67 Vp
42.7427 142.4547 15.0 2135.6 6.12 Vp
42.8141 142.3797 15.0 1452.3 5.92 Vp
42.8854 142.3045 15.0 203.3 5.60 Vp
42.9567 142.2291 15.0 163.7 5.52 Vp
43.0279 142.1536 15.0 71.5 5.53 Vp
43.0991 142.0779 15.0 303.1 5.84 Vp
43.1702 142.0020 15.0 693.4 5.86 Vp
43.2413 141.9260 15.0 291.6 6.01 Vp
43.3123 141.8497 15.0 0.0 6.25 Vp
43.3833 141.7733 15.0 0.0 6.27 Vp
41.9816 143.3169 15.0 0.0 5.80 Vp
42.0535 143.2438 15.0 128.4 5.60 Vp
42.1254 143.1705 15.0 519.7 6.03 Vp
42.1972 143.0970 15.0 838.5 6.21 Vp
42.2690 143.0234 15.0 1217.4 5.53 Vp
42.3408 142.9496 15.0 1533.0 4.90 Vp
42.4124 142.8757 15.0 3981.0 6.19 Vp
42.4841 142.8015 15.0 1643.0 6.02 Vp
42.5557 142.7272 15.0 849.5 5.69 Vp
42.6273 142.6528 15.0 1475.5 6.71 Vp
42.6988 142.5781 15.0 865.0 5.72 Vp
42.7702 142.5033 15.0 1511.1 6.66 Vp
42.8416 142.4283 15.0 2164.6 6.89 Vp
42.9130 142.3532 15.0 336.7 5.92 Vp
42.9843 142.2778 15.0 103.3 5.50 Vp
43.0555 142.2023 15.0 26.3 5.50 Vp
43.1268 142.1266 15.0 98.3 5.49 Vp
43.1979 142.0508 15.0 142.3 5.76 Vp
43.2690 141.9748 15.0 30.2 5.92 Vp
43.3401 141.8985 15.0 0.0 6.02 Vp
43.4110 141.8222 15.0 0.0 6.20 Vp
42.0087 143.3653 15.0 0.0 5.98 Vp
42.0807 143.2922 15.0 93.3 6.21 Vp
42.1526 143.2189 15.0 693.6 5.93 Vp
42.2245 143.1455 15.0 1794.0 6.09 Vp
42.2963 143.0719 15.0 1967.4 5.64 Vp
42.3680 142.9982 15.0 2747.6 6.15 Vp
42.4398 142.9242 15.0 3734.6 6.98 Vp
42.5115 142.8501 15.0 1909.9 6.58 Vp
42.5831 142.7758 15.0 986.4 5.90 Vp
42.6547 142.7014 15.0 1369.5 6.09 Vp
42.7262 142.6268 15.0 1215.3 6.30 Vp
42.7977 142.5520 15.0 666.9 5.91 Vp
42.8691 142.4770 15.0 979.2 6.08 Vp
42.9405 142.4019 15.0 409.4 6.39 Vp
43.0119 142.3266 15.0 58.6 5.67 Vp
43.0832 142.2511 15.0 28.1 5.64 Vp
43.1544 142.1754 15.0 101.0 5.84 Vp
43.2256 142.0996 15.0 218.6 5.84 Vp
43.2967 142.0236 15.0 6.9 5.78 Vp
43.3678 141.9474 15.0 0.0 6.12 Vp
43.4388 141.8710 15.0 0.0 6.14 Vp
42.0359 143.4137 15.0 0.0 5.76 Vp
42.1078 143.3407 15.0 15.1 6.22 Vp
42.1798 143.2674 15.0 399.4 6.14 Vp
42.2517 143.1940 15.0 870.9 6.87 Vp
42.3235 143.1205 15.0 2355.4 6.81 Vp
42.3953 143.0467 15.0 6610.4 8.07 Vp
42.4671 142.9728 15.0 3153.3 8.13 Vp
42.5388 142.8987 15.0 1889.4 7.45 Vp
42.6105 142.8245 15.0 1120.8 6.67 Vp
42.6821 142.7501 15.0 2383.0 7.29 Vp
42.7536 142.6755 15.0 1736.0 6.48 Vp
42.8252 142.6007 15.0 617.8 6.40 Vp
42.8966 142.5258 15.0 411.8 6.31 Vp
42.9681 142.4507 15.0 207.4 6.15 Vp
43.0394 142.3754 15.0 51.7 5.56 Vp
43.1107 142.2999 15.0 27.9 5.29 Vp
43.1820 142.2243 15.0 78.3 5.70 Vp
43.2532 142.1485 15.0 63.6 5.87 Vp
43.3244 142.0725 15.0 7.5 5.70 Vp
43.3955 141.9963 15.0 0.0 5.90 Vp
43.4666 141.9200 15.0 0.0 5.63 Vp
42.0630 143.4622 15.0 0.0 6.22 Vp
42.1350 143.3892 15.0 18.5 6.22 Vp
42.2069 143.3160 15.0 152.0 6.08 Vp
42.2789 143.2426 15.0 1140.4 6.49 Vp
42.3507 143.1691 15.0 2194.6 6.89 Vp
42.4226 143.0954 15.0 3152.7 7.01 Vp
42.4944 143.0215 15.0 1930.0 6.26 Vp
42.5661 142.9474 15.0 2183.4 6.52 Vp
42.6378 142.8732 15.0 2255.3 7.91 Vp
42.7094 142.7988 15.0 3349.0 7.05 Vp
42.7810 142.7242 15.0 1531.3 6.34 Vp
42.8526 142.6495 15.0 727.3 6.26 Vp
42.9241 142.5745 15.0 365.8 5.90 Vp
42.9956 142.4995 15.0 223.4 6.21 Vp
43.0670 142.4242 15.0 80.1 5.88 Vp
43.1383 142.3488 15.0 105.9 6.03 Vp
43.2096 142.2731 15.0 38.9 5.68 Vp
43.2809 142.1974 15.0 17.5 5.71 Vp
43.3521 142.1214 15.0 7.8 5.72 Vp
43.4232 142.0452 15.0 0.0 6.06 Vp
43.4943 141.9689 15.0 0.0 5.76 Vp
42.0900 143.5108 15.0 0.0 6.22 Vp
42.1621 143.4377 15.0 0.6 6.22 Vp
42.2341 143.3646 15.0 18.3 6.17 Vp
42.3060 143.2912 15.0 1224.5 5.16 Vp
42.3779 143.2177 15.0 2140.9 6.40 Vp
42.4498 143.1440 15.0 1408.5 5.58 Vp
42.5216 143.0702 15.0 2626.6 6.43 Vp
42.5934 142.9961 15.0 2103.0 6.27 Vp
42.6651 142.9219 15.0 1704.5 6.58 Vp
42.7368 142.8475 15.0 2546.5 6.92 Vp
42.8084 142.7730 15.0 640.8 7.09 Vp
42.8800 142.6983 15.0 572.0 7.05 Vp
42.9516 142.6234 15.0 467.4 6.25 Vp
43.0230 142.5483 15.0 1159.4 6.83 Vp
43.0945 142.4731 15.0 133.1 6.01 Vp
43.1659 142.3976 15.0 143.6 6.00 Vp
43.2372 142.3221 15.0 139.0 5.98 Vp
43.3085 142.2463 15.0 52.2 5.62 Vp
43.3797 142.1703 15.0 7.0 5.62 Vp
43.4509 142.0942 15.0 0.0 5.59 Vp
43.5220 142.0179 15.0 0.0 5.57 Vp
42.1171 143.5593 15.0 0.0 6.22 Vp
42.1892 143.4863 15.0 0.0 6.22 Vp
42.2612 143.4132 15.0 4.2 6.14 Vp
42.3332 143.3399 15.0 686.7 5.63 Vp
42.4051 143.2664 15.0 884.2 6.10 Vp
42.4770 143.1927 15.0 1325.1 5.98 Vp
42.5489 143.1189 15.0 1999.6 6.20 Vp
42.6207 143.0449 15.0 1220.4 5.69 Vp
42.6924 142.9707 15.0 1829.8 5.95 Vp
42.7641 142.8963 15.0 2049.2 6.75 Vp
42.8358 142.8218 15.0 3267.2 7.23 Vp
42.9074 142.7471 15.0 2575.4 8.36 Vp
42.9790 142.6722 15.0 855.6 5.27 Vp
43.0505 142.5972 15.0 1608.1 6.73 Vp
43.1220 142.5220 15.0 749.0 6.28 Vp
43.1934 142.4466 15.0 213.0 5.97 Vp
43.2647 142.3710 15.0 693.8 6.39 Vp
43.3360 142.2953 15.0 259.0 5.68 Vp
43.4073 142.2194 15.0 7.5 5.59 Vp
43.4785 142.1433 15.0 0.0 5.71 Vp
43.5497 142.0670 15.0 0.0 5.51 Vp
42.1441 143.6080 15.0 0.0 6.22 Vp
42.2162 143.5350 15.0 0.0 6.22 Vp
42.2883 143.4619 15.0 1.0 6.20 Vp
42.3603 143.3886 15.0 58.4 5.80 Vp
42.4323 143.3151 15.0 193.7 5.68 Vp
42.5042 143.2415 15.0 3222.2 6.75 Vp
42.5761 143.1676 15.0 2873.4 6.50 Vp
42.6479 143.0937 15.0 1647.6 5.98 Vp
42.7197 143.0195 15.0 881.4 5.76 Vp
42.7915 142.9452 15.0 573.9 5.55 Vp
42.8631 142.8707 15.0 2538.5 5.66 Vp
42.9348 142.7960 15.0 1637.2 6.54 Vp
43.0064 142.7212 15.0 994.1 5.99 Vp
43.0779 142.6461 15.0 693.6 5.99 Vp
43.1494 142.5709 15.0 754.7 6.05 Vp
43.2209 142.4956 15.0 244.6 5.43 Vp
43.2923 142.4200 15.0 619.9 6.10 Vp
43.3636 142.3443 15.0 834.8 6.03 Vp
43.4349 142.2684 15.0 50.2 6.25 Vp
43.5061 142.1923 15.0 0.0 5.61 Vp
43.5773 142.1161 15.0 0.0 5.56 Vp
42.1711 143.6566 15.0 0.0 6.22 Vp
42.2433 143.5837 15.0 0.0 6.22 Vp
42.3154 143.5106 15.0 0.4 6.19 Vp
42.3874 143.4373 15.0 27.9 5.99 Vp
42.4594 143.3639 15.0 83.5 5.34 Vp
42.5314 143.2902 15.0 3600.1 6.19 Vp
42.6033 143.2165 15.0 3335.3 6.40 Vp
42.6752 143.1425 15.0 2654.6 6.34 Vp
42.7470 143.0684 15.0 1180.4 5.98 Vp
42.8187 142.9941 15.0 2059.6 6.54 Vp
42.8905 142.9196 15.0 2966.0 6.46 Vp
42.9621 142.8449 15.0 1069.2 6.52 Vp
43.0338 142.7701 15.0 855.4 6.03 Vp
43.1054 142.6951 15.0 667.0 6.09 Vp
43.1769 142.6199 15.0 896.5 6.89 Vp
43.2484 142.5446 15.0 408.4 5.84 Vp
43.3198 142.4691 15.0 334.8 5.77 Vp
43.3912 142.3934 15.0 296.0 5.78 Vp
43.4625 142.3175 15.0 132.0 5.87 Vp
43.5337 142.2415 15.0 0.0 5.63 Vp
43.6050 142.1652 15.0 0.0 5.52 Vp
42.1981 143.7053 15.0 0.0 6.22 Vp
42.2703 143.6324 15.0 0.0 6.22 Vp
42.3424 143.5593 15.0 0.0 6.22 Vp
42.4145 143.4861 15.0 23.5 6.21 Vp
42.4865 143.4127 15.0 37.7 4.79 Vp
42.5585 143.3391 15.0 1005.5 4.89 Vp
42.6305 143.2653 15.0 2819.1 5.90 Vp
42.7024 143.1914 15.0 465.3 5.41 Vp
42.7742 143.1173 15.0 422.1 6.03 Vp
42.8460 143.0430 15.0 986.5 5.56 Vp
42.9178 142.9685 15.0 643.0 5.15 Vp
42.9895 142.8939 15.0 1494.2 6.07 Vp
43.0611 142.8191 15.0 2363.3 6.34 Vp
43.1327 142.7441 15.0 868.3 6.61 Vp
43.2043 142.6690 15.0 714.6 6.12 Vp
43.2758 142.5937 15.0 691.3 6.01 Vp
43.3473 142.5182 15.0 423.9 5.90 Vp
43.4187 142.4425 15.0 147.5 5.52 Vp
43.4900 142.3667 15.0 113.9 5.61 Vp
43.5613 142.2906 15.0 0.0 5.87 Vp
43.6326 142.2144 15.0 0.0 6.02 Vp
42.2251 143.7540 15.0 0.0 6.22 Vp
42.2973 143.6812 15.0 0.0 6.22 Vp
42.3694 143.6081 15.0 0.0 6.22 Vp
42.4416 143.5349 15.0 21.1 6.20 Vp
42.5136 143.4615 15.0 35.2 4.99 Vp
42.5856 143.3879 15.0 1496.7 5.40 Vp
42.6576 143.3142 15.0 3806.8 6.46 Vp
42.7295 143.2403 15.0 308.1 5.64 Vp
42.8014 143.1662 15.0 396.3 5.72 Vp
42.8733 143.0920 15.0 1094.5 5.69 Vp
42.9451 143.0175 15.0 150.5 5.16 Vp
43.0168 142.9429 15.0 677.9 6.06 Vp
43.0885 142.8682 15.0 2884.7 6.25 Vp
43.1601 142.7932 15.0 347.0 5.71 Vp
43.2317 142.7181 15.0 122.4 5.71 Vp
43.3033 142.6428 15.0 192.0 5.77 Vp
43.3747 142.5673 15.0 398.9 6.09 Vp
43.4462 142.4917 15.0 248.1 5.62 Vp
43.5176 142.4158 15.0 210.1 5.96 Vp
43.5889 142.3398 15.0 0.0 6.01 Vp
43.6602 142.2637 15.0 0.0 5.99 Vp
42.2521 143.8028 15.0 0.0 6.22 Vp
42.3243 143.7300 15.0 0.0 6.22 Vp
42.3965 143.6569 15.0 0.0 6.22 Vp
42.4686 143.5837 15.0 8.1 6.22 Vp
42.5407 143.5104 15.0 32.3 5.49 Vp
42.6127 143.4368 15.0 1286.8 6.24 Vp
42.6848 143.3631 15.0 2504.0 6.58 Vp
42.7567 143.2893 15.0 392.4 5.29 Vp
42.8286 143.2152 15.0 330.2 5.66 Vp
42.9005 143.1410 15.0 776.2 6.00 Vp
42.9723 143.0666 15.0 154.5 5.73 Vp
43.0441 142.9920 15.0 429.5 6.07 Vp
43.1158 142.9172 15.0 2708.4 6.22 Vp
43.1875 142.8423 15.0 921.8 5.86 Vp
43.2591 142.7672 15.0 108.6 5.77 Vp
43.3307 142.6919 15.0 48.0 5.96 Vp
43.4022 142.6165 15.0 261.3 6.48 Vp
43.4737 142.5409 15.0 347.1 6.13 Vp
43.5451 142.4651 15.0 19.0 5.84 Vp
43.6164 142.3891 15.0 0.0 6.17 Vp
43.6877 142.3129 15.0 0.0 6.23 Vp
42.2790 143.8516 15.0 0.0 6.22 Vp
42.3512 143.7788 15.0 0.0 6.22 Vp
42.4235 143.7058 15.0 0.0 6.22 Vp
42.4956 143.6326 15.0 3.8 6.22 Vp
42.5677 143.5593 15.0 33.2 5.99 Vp
42.6398 143.4858 15.0 212.2 5.26 Vp
42.7119 143.4121 15.0 1131.4 5.54 Vp
42.7839 143.3383 15.0 412.3 5.16 Vp
42.8558 143.2642 15.0 230.5 5.25 Vp
42.9277 143.1900 15.0 147.8 5.35 Vp
42.9996 143.1156 15.0 188.6 5.45 Vp
43.0714 143.0411 15.0 780.8 6.15 Vp
43.1431 142.9664 15.0 2530.6 6.28 Vp
43.2148 142.8915 15.0 2213.6 6.84 Vp
43.2865 142.8164 15.0 337.0 5.81 Vp
43.3581 142.7411 15.0 194.1 5.98 Vp
43.4296 142.6657 15.0 289.9 6.13 Vp
43.5011 142.5901 15.0 298.5 6.19 Vp
43.5726 142.5143 15.0 1.5 6.20 Vp
43.6440 142.4384 15.0 0.0 6.17 Vp
43.7153 142.3622 15.0 0.0 6.23 Vp
42.3059 143.9005 15.0 0.0 6.22 Vp
42.3782 143.8277 15.0 0.0 6.22 Vp
42.4504 143.7547 15.0 0.0 6.22 Vp
42.5226 143.6816 15.0 3.1 6.22 Vp
42.5948 143.6083 15.0 30.4 5.39 Vp
42.6669 143.5348 15.0 175.8 5.21 Vp
42.7390 143.4611 15.0 833.1 5.66 Vp
42.8110 143.3873 15.0 347.8 5.13 Vp
42.8830 143.3133 15.0 87.5 5.12 Vp
42.9549 143.2391 15.0 49.6 5.17 Vp
43.0268 143.1648 15.0 148.6 5.65 Vp
43.0986 143.0903 15.0 627.6 6.20 Vp
43.1704 143.0155 15.0 2290.9 6.49 Vp
43.2421 142.9407 15.0 1138.6 6.00 Vp
43.3138 142.8656 15.0 161.8 5.75 Vp
43.3854 142.7904 15.0 95.5 5.90 Vp
43.4570 142.7150 15.0 22.3 6.05 Vp
43.5285 142.6394 15.0 25.2 5.98 Vp
43.6000 142.5637 15.0 1.4 6.22 Vp
43.6715 142.4877 15.0 0.0 6.22 Vp
43.7428 142.4116 15.0 0.0 6.22 Vp
42.3328 143.9494 15.0 0.0 6.22 Vp
42.4051 143.8766 15.0 0.0 6.22 Vp
42.4774 143.8037 15.0 0.0 6.22 Vp
42.5496 143.7306 15.0 0.2 6.22 Vp
42.6218 143.6573 15.0 17.9 5.82 Vp
42.6939 143.5838 15.0 168.2 5.25 Vp
42.7660 143.5102 15.0 1064.8 5.74 Vp
42.8381 143.4364 15.0 830.4 5.55 Vp
42.9101 143.3624 15.0 127.0 5.71 Vp
42.9820 143.2883 15.0 179.4 5.60 Vp
43.0540 143.2139 15.0 209.6 5.67 Vp
43.1258 143.1394 15.0 478.7 5.77 Vp
43.1976 143.0648 15.0 2778.4 6.49 Vp
43.2694 142.9899 15.0 842.6 6.05 Vp
43.3411 142.9149 15.0 231.3 5.75 Vp
43.4128 142.8397 15.0 13.4 6.22 Vp
43.4844 142.7643 15.0 16.6 6.22 Vp
43.5560 142.6888 15.0 1.1 6.22 Vp
43.6275 142.6130 15.0 1.3 6.22 Vp
43.6989 142.5371 15.0 0.0 6.22 Vp
43.7703 142.4610 15.0 0.0 6.22 Vp
42.3596 143.9983 15.0 0.0 6.22 Vp
42.4320 143.9256 15.0 0.0 6.22 Vp
42.5043 143.8527 15.0 0.0 6.22 Vp
42.5766 143.7796 15.0 0.1 6.22 Vp
42.6488 143.7063 15.0 16.2 6.22 Vp
42.7210 143.6329 15.0 69.2 5.13 Vp
42.7931 143.5593 15.0 712.6 5.32 Vp
42.8652 143.4855 15.0 742.7 5.54 Vp
42.9372 143.4116 15.0 266.0 5.85 Vp
43.0092 143.3374 15.0 412.2 5.58 Vp
43.0811 143.2631 15.0 156.1 5.63 Vp
43.1530 143.1887 15.0 70.5 5.64 Vp
43.2249 143.1140 15.0 644.6 5.93 Vp
43.2967 143.0392 15.0 554.3 6.04 Vp
43.3684 142.9642 15.0 198.4 5.91 Vp
43.4401 142.8890 15.0 13.4 6.22 Vp
43.5118 142.8137 15.0 2.5 6.21 Vp
43.5834 142.7381 15.0 1.3 6.22 Vp
43.6549 142.6624 15.0 1.4 6.16 Vp
43.7264 142.5865 15.0 0.0 6.16 Vp
43.7978 142.5105 15.0 0.0 6.16 Vp
42.3865 144.0473 15.0 0.0 6.22 Vp
42.4589 143.9746 15.0 0.0 6.22 Vp
42.5312 143.9017 15.0 0.0 6.22 Vp
42.6035 143.8287 15.0 0.0 6.22 Vp
42.6757 143.7554 15.0 5.2 6.22 Vp
42.7479 143.6820 15.0 209.1 5.33 Vp
42.8201 143.6084 15.0 2485.2 6.00 Vp
42.8922 143.5347 15.0 2854.2 5.66 Vp
42.9643 143.4608 15.0 732.3 5.82 Vp
43.0363 143.3867 15.0 272.1 5.02 Vp
43.1083 143.3124 15.0 252.0 5.68 Vp
43.1802 143.2379 15.0 105.1 5.55 Vp
43.2521 143.1633 15.0 81.1 5.77 Vp
43.3239 143.0885 15.0 648.4 5.52 Vp
43.3957 143.0135 15.0 146.4 5.51 Vp
43.4674 142.9384 15.0 18.5 6.16 Vp
43.5391 142.8631 15.0 1.8 6.16 Vp
43.6107 142.7876 15.0 2.5 6.16 Vp
43.6823 142.7119 15.0 1.7 6.16 Vp
43.7538 142.6360 15.0 0.0 6.16 Vp
43.8253 142.5600 15.0 0.0 6.16 Vp
42.4401 144.1454 15.0 0.0 6.22 Vp
42.5125 144.0728 15.0 0.0 6.22 Vp
42.5849 143.9999 15.0 0.0 6.22 Vp
42.6573 143.9269 15.0 0.0 6.22 Vp
42.7296 143.8537 15.0 4.0 6.22 Vp
42.8019 143.7804 15.0 1284.3 5.30 Vp
42.8741 143.7068 15.0 6525.8 5.40 Vp
42.9463 143.6332 15.0 4218.5 5.67 Vp
43.0184 143.5593 15.0 2308.5 5.97 Vp
43.0905 143.4852 15.0 833.2 5.28 Vp
43.1625 143.4110 15.0 2158.7 5.96 Vp
43.2345 143.3366 15.0 1446.1 5.73 Vp
43.3065 143.2620 15.0 305.2 6.28 Vp
43.3783 143.1873 15.0 2760.0 6.44 Vp
43.4502 143.1124 15.0 548.6 6.15 Vp
43.5220 143.0373 15.0 21.2 6.16 Vp
43.5937 142.9620 15.0 7.1 6.16 Vp
43.6654 142.8865 15.0 24.6 6.16 Vp
43.7370 142.8109 15.0 4.0 6.16 Vp
43.8086 142.7351 15.0 0.0 6.16 Vp
43.8801 142.6591 15.0 0.0 6.16 Vp
42.4936 144.2437 15.0 0.0 6.16 Vp
42.5661 144.1711 15.0 0.0 6.16 Vp
42.6386 144.0983 15.0 0.0 6.16 Vp
42.7110 144.0253 15.0 0.0 6.16 Vp
42.7834 143.9522 15.0 6.3 6.16 Vp
42.8557 143.8789 15.0 1264.1 5.40 Vp
42.9280 143.8054 15.0 4331.6 5.63 Vp
43.0002 143.7318 15.0 582.7 5.84 Vp
43.0724 143.6580 15.0 989.5 5.61 Vp
43.1446 143.5840 15.0 1840.4 5.89 Vp
43.2167 143.5098 15.0 1014.2 5.88 Vp
43.2887 143.4355 15.0 992.5 5.89 Vp
43.3607 143.3609 15.0 59.8 6.14 Vp
43.4327 143.2863 15.0 215.1 6.20 Vp
43.5046 143.2114 15.0 66.7 6.11 Vp
43.5764 143.1363 15.0 31.7 5.92 Vp
43.6482 143.0611 15.0 33.6 5.44 Vp
43.7200 142.9857 15.0 71.3 5.45 Vp
43.7917 142.9101 15.0 51.7 5.78 Vp
43.8633 142.8344 15.0 0.0 6.16 Vp
43.9349 142.7584 15.0 0.0 6.16 Vp
42.5471 144.3421 15.0 0.0 6.16 Vp
42.6197 144.2695 15.0 0.0 6.16 Vp
42.6922 144.1968 15.0 0.0 6.16 Vp
42.7646 144.1239 15.0 0.0 6.16 Vp
42.8371 144.0508 15.0 0.7 6.16 Vp
42.9095 143.9776 15.0 858.3 5.61 Vp
42.9818 143.9042 15.0 1492.5 5.22 Vp
43.0541 143.8306 15.0 1342.1 6.10 Vp
43.1264 143.7568 15.0 1251.1 5.78 Vp
43.1986 143.6829 15.0 7342.0 6.30 Vp
43.2707 143.6088 15.0 2155.6 5.56 Vp
43.3428 143.5345 15.0 458.3 6.30 Vp
43.4149 143.4600 15.0 115.0 6.02 Vp
43.4869 143.3854 15.0 291.7 6.18 Vp
43.5589 143.3105 15.0 36.6 5.86 Vp
43.6308 143.2355 15.0 7.2 6.16 Vp
43.7027 143.1604 15.0 223.3 6.05 Vp
43.7745 143.0850 15.0 480.5 5.95 Vp
43.8462 143.0095 15.0 76.8 6.03 Vp
43.9179 142.9338 15.0 0.0 6.16 Vp
43.9896 142.8579 15.0 0.0 6.16 Vp
42.6004 144.4406 15.0 0.0 6.16 Vp
42.6731 144.3681 15.0 0.0 6.16 Vp
42.7457 144.2955 15.0 0.0 6.16 Vp
42.8182 144.2227 15.0 0.0 6.16 Vp
42.8907 144.1496 15.0 0.0 6.16 Vp
42.9631 144.0765 15.0 267.0 5.75 Vp
43.0355 144.0031 15.0 679.1 5.75 Vp
43.1079 143.9296 15.0 1215.8 6.12 Vp
43.1802 143.8559 15.0 1522.6 5.95 Vp
43.2525 143.7820 15.0 2574.5 5.96 Vp
43.3247 143.7079 15.0 1591.8 6.21 Vp
43.3969 143.6337 15.0 1223.0 6.35 Vp
43.4690 143.5593 15.0 216.5 5.92 Vp
43.5411 143.4847 15.0 1156.4 6.92 Vp
43.6131 143.4099 15.0 164.6 5.55 Vp
43.6851 143.3349 15.0 2.7 6.16 Vp
43.7570 143.2598 15.0 38.8 6.12 Vp
43.8289 143.1845 15.0 145.4 6.40 Vp
43.9007 143.1091 15.0 18.0 6.16 Vp
43.9725 143.0334 15.0 0.0 6.16 Vp
44.0442 142.9576 15.0 0.0 6.16 Vp
42.6537 144.5394 15.0 0.0 6.16 Vp
42.7264 144.4670 15.0 0.0 6.16 Vp
42.7990 144.3943 15.0 0.0 6.16 Vp
42.8716 144.3216 15.0 0.0 6.16 Vp
42.9442 144.2486 15.0 0.0 6.16 Vp
43.0167 144.1755 15.0 0.0 6.16 Vp
43.0892 144.1022 15.0 0.0 6.16 Vp
43.1616 144.0287 15.0 7.2 6.16 Vp
43.2340 143.9550 15.0 25.5 6.16 Vp
43.3063 143.8812 15.0 19.0 6.19 Vp
43.3786 143.8072 15.0 30.1 6.18 Vp
43.4508 143.7330 15.0 338.4 6.29 Vp
43.5230 143.6587 15.0 52.2 6.07 Vp
43.5951 143.5841 15.0 267.3 6.79 Vp
43.6672 143.5094 15.0 76.7 6.13 Vp
43.7393 143.4345 15.0 0.0 6.16 Vp
43.8113 143.3595 15.0 0.0 6.16 Vp
43.8832 143.2842 15.0 0.0 6.16 Vp
43.9551 143.2088 15.0 0.0 6.16 Vp
44.0269 143.1332 15.0 0.0 6.16 Vp
44.0987 143.0574 15.0 0.0 6.16 Vp
41.0182 141.6479 20.0 0.0 6.45 Vp
41.0891 141.5739 20.0 0.0 6.63 Vp
41.1599 141.4998 20.0 0.0 6.81 Vp
41.2307 141.4256 20.0 0.0 7.04 Vp
41.3014 141.3512 20.0 2.1 6.83 Vp
41.3721 141.2766 20.0 1.3 6.97 Vp
41.4427 141.2018 20.0 0.0 6.82 Vp
41.5133 141.1269 20.0 0.0 6.66 Vp
41.5839 141.0518 20.0 0.0 6.73 Vp
41.6544 140.9766 20.0 0.0 6.43 Vp
41.7248 140.9012 20.0 0.0 6.34 Vp
41.7952 140.8256 20.0 0.0 6.23 Vp
41.8656 140.7498 20.0 0.0 6.08 Vp
41.9358 140.6739 20.0 0.0 6.10 Vp
42.0061 140.5979 20.0 0.0 6.01 Vp
42.0763 140.5216 20.0 0.0 6.43 Vp
42.1464 140.4452 20.0 0.0 6.52 Vp
42.2165 140.3686 20.0 0.0 6.28 Vp
42.2866 140.2919 20.0 0.0 6.44 Vp
42.3565 140.2150 20.0 0.0 6.64 Vp
42.4265 140.1379 20.0 0.0 6.43 Vp
41.0738 141.7419 20.0 0.0 6.45 Vp
41.1448 141.6680 20.0 0.0 6.76 Vp
41.2157 141.5940 20.0 0.0 7.05 Vp
41.2865 141.5197 20.0 0.0 7.18 Vp
41.3573 141.4454 20.0 217.7 6.89 Vp
41.4280 141.3708 20.0 484.3 6.95 Vp
41.4988 141.2961 20.0 50.7 6.98 Vp
41.5694 141.2212 20.0 0.0 6.55 Vp
41.6400 141.1462 20.0 0.0 6.47 Vp
41.7106 141.0710 20.0 0.8 6.37 Vp
41.7811 140.9956 20.0 9.5 6.25 Vp
41.8516 140.9200 20.0 5.0 6.13 Vp
41.9220 140.8443 20.0 3.0 6.09 Vp
41.9923 140.7684 20.0 0.6 6.01 Vp
42.0626 140.6924 20.0 1.4 6.34 Vp
42.1329 140.6162 20.0 0.0 6.63 Vp
42.2031 140.5398 20.0 0.0 6.76 Vp
42.2733 140.4633 20.0 0.0 6.71 Vp
42.3434 140.3866 20.0 0.0 6.68 Vp
42.4134 140.3097 20.0 0.0 6.42 Vp
42.4834 140.2327 20.0 0.0 6.32 Vp
41.1294 141.8361 20.0 0.0 6.45 Vp
41.2004 141.7623 20.0 0.0 6.64 Vp
41.2714 141.6883 20.0 0.0 7.09 Vp
41.3423 141.6141 20.0 1.4 6.97 Vp
41.4131 141.5397 20.0 443.5 6.68 Vp
41.4839 141.4652 20.0 983.8 6.84 Vp
41.5547 141.3905 20.0 285.5 6.91 Vp
41.6254 141.3157 20.0 0.5 6.60 Vp
41.6961 141.2407 20.0 1.0 6.38 Vp
41.7667 141.1655 20.0 78.5 6.53 Vp
41.8373 141.0902 20.0 713.8 6.36 Vp
41.9078 141.0147 20.0 397.9 6.19 Vp
41.9783 140.9390 20.0 40.1 6.43 Vp
42.0487 140.8631 20.0 19.8 6.77 Vp
42.1191 140.7871 20.0 5.9 6.52 Vp
42.1894 140.7110 20.0 0.5 6.64 Vp
42.2597 140.6346 20.0 0.0 6.73 Vp
42.3299 140.5581 20.0 0.0 6.68 Vp
42.4001 140.4814 20.0 0.0 6.52 Vp
42.4702 140.4046 20.0 0.0 6.41 Vp
42.5403 140.3276 20.0 0.0 6.46 Vp
41.1849 141.9305 20.0 0.0 6.45 Vp
41.2560 141.8567 20.0 0.0 6.45 Vp
41.3270 141.7827 20.0 0.0 6.76 Vp
41.3980 141.7086 20.0 0.6 6.65 Vp
41.4689 141.6343 20.0 1153.9 6.54 Vp
41.5398 141.5598 20.0 1078.3 6.68 Vp
41.6106 141.4851 20.0 46.2 6.65 Vp
41.6814 141.4103 20.0 0.0 6.55 Vp
41.7521 141.3354 20.0 0.8 6.57 Vp
41.8228 141.2602 20.0 516.2 6.77 Vp
41.8935 141.1849 20.0 2633.0 6.79 Vp
41.9641 141.1095 20.0 2531.5 6.57 Vp
42.0346 141.0338 20.0 169.7 6.79 Vp
42.1051 140.9580 20.0 18.0 6.72 Vp
42.1755 140.8820 20.0 4.7 6.58 Vp
42.2459 140.8059 20.0 0.0 6.57 Vp
42.3163 140.7296 20.0 0.0 6.60 Vp
42.3865 140.6531 20.0 0.0 6.52 Vp
42.4568 140.5765 20.0 0.0 6.68 Vp
42.5269 140.4996 20.0 0.0 6.58 Vp
42.5971 140.4227 20.0 0.0 6.51 Vp
41.2404 142.0251 20.0 0.0 6.45 Vp
41.3115 141.9513 20.0 0.0 6.45 Vp
41.3826 141.8773 20.0 0.0 6.61 Vp
41.4536 141.8032 20.0 0.0 6.46 Vp
41.5246 141.7290 20.0 202.5 6.48 Vp
41.5955 141.6545 20.0 136.5 6.52 Vp
41.6664 141.5799 20.0 0.4 6.45 Vp
41.7373 141.5052 20.0 0.0 6.54 Vp
41.8081 141.4302 20.0 0.0 6.52 Vp
41.8788 141.3551 20.0 1529.1 6.68 Vp
41.9495 141.2799 20.0 5992.1 6.96 Vp
42.0202 141.2044 20.0 2671.2 6.89 Vp
42.0908 141.1288 20.0 56.8 6.74 Vp
42.1613 141.0531 20.0 9.4 6.49 Vp
42.2319 140.9771 20.0 7.5 6.55 Vp
42.3023 140.9010 20.0 2.6 6.59 Vp
42.3727 140.8248 20.0 0.4 6.68 Vp
42.4431 140.7483 20.0 0.0 6.90 Vp
42.5134 140.6717 20.0 0.0 6.91 Vp
42.5836 140.5949 20.0 0.0 6.65 Vp
42.6538 140.5179 20.0 0.0 6.39 Vp
41.2957 142.1198 20.0 0.0 6.45 Vp
41.3669 142.0460 20.0 0.0 6.45 Vp
41.4380 141.9722 20.0 0.0 6.45 Vp
41.5091 141.8981 20.0 0.0 6.45 Vp
41.5802 141.8239 20.0 0.0 6.45 Vp
41.6512 141.7495 20.0 0.0 6.45 Vp
41.7222 141.6749 20.0 0.0 6.45 Vp
41.7931 141.6002 20.0 0.0 6.45 Vp
41.8639 141.5253 20.0 0.0 6.57 Vp
41.9348 141.4502 20.0 298.1 6.60 Vp
42.0055 141.3750 20.0 1054.6 6.72 Vp
42.0762 141.2996 20.0 213.1 6.73 Vp
42.1469 141.2240 20.0 67.8 6.75 Vp
42.2175 141.1483 20.0 53.1 6.78 Vp
42.2881 141.0724 20.0 302.4 6.76 Vp
42.3586 140.9963 20.0 172.2 6.69 Vp
42.4291 140.9201 20.0 32.7 6.86 Vp
42.4995 140.8437 20.0 0.1 6.69 Vp
42.5699 140.7671 20.0 0.0 6.74 Vp
42.6402 140.6903 20.0 0.0 6.53 Vp
42.7104 140.6134 20.0 0.0 6.31 Vp
41.3510 142.2147 20.0 0.0 6.45 Vp
41.4222 142.1410 20.0 0.0 6.45 Vp
41.4934 142.0671 20.0 0.0 6.45 Vp
41.5646 141.9931 20.0 0.0 6.45 Vp
41.6357 141.9189 20.0 0.0 6.45 Vp
41.7068 141.8445 20.0 0.0 6.45 Vp
41.7778 141.7700 20.0 0.0 6.45 Vp
41.8488 141.6953 20.0 0.0 6.45 Vp
41.9197 141.6205 20.0 0.0 6.50 Vp
41.9906 141.5454 20.0 57.3 6.60 Vp
42.0614 141.4703 20.0 115.4 6.65 Vp
42.1322 141.3949 20.0 104.7 6.42 Vp
42.2030 141.3194 20.0 53.4 6.57 Vp
42.2736 141.2437 20.0 133.3 6.85 Vp
42.3443 141.1678 20.0 1227.6 6.99 Vp
42.4149 141.0918 20.0 1103.3 6.90 Vp
42.4854 141.0156 20.0 472.8 6.84 Vp
42.5559 140.9392 20.0 2.2 6.50 Vp
42.6263 140.8627 20.0 0.0 6.50 Vp
42.6967 140.7859 20.0 0.0 6.41 Vp
42.7670 140.7091 20.0 0.0 6.41 Vp
41.4062 142.3097 20.0 0.0 6.45 Vp
41.4775 142.2361 20.0 0.0 6.45 Vp
41.5488 142.1622 20.0 0.0 6.45 Vp
41.6200 142.0883 20.0 0.0 6.45 Vp
41.6912 142.0141 20.0 0.0 6.45 Vp
41.7623 141.9398 20.0 0.0 6.45 Vp
41.8334 141.8653 20.0 0.0 6.45 Vp
41.9044 141.7907 20.0 0.0 6.45 Vp
41.9754 141.7158 20.0 0.0 6.45 Vp
42.0464 141.6409 20.0 38.8 6.55 Vp
42.1173 141.5657 20.0 70.5 6.71 Vp
42.1881 141.4904 20.0 81.3 6.47 Vp
42.2589 141.4149 20.0 24.8 6.54 Vp
42.3297 141.3392 20.0 355.4 6.80 Vp
42.4004 141.2634 20.0 2972.6 6.93 Vp
42.4710 141.1874 20.0 1808.2 6.88 Vp
42.5416 141.1113 20.0 597.7 6.63 Vp
42.6122 141.0349 20.0 249.6 6.52 Vp
42.6826 140.9584 20.0 133.8 6.47 Vp
42.7531 140.8817 20.0 22.8 6.44 Vp
42.8235 140.8049 20.0 0.0 6.47 Vp
41.4613 142.4049 20.0 0.0 6.45 Vp
41.5327 142.3313 20.0 0.0 6.45 Vp
41.6040 142.2575 20.0 0.0 6.45 Vp
41.6753 142.1836 20.0 0.0 6.45 Vp
41.7466 142.1095 20.0 0.0 6.45 Vp
41.8178 142.0352 20.0 0.0 6.45 Vp
41.8889 141.9608 20.0 0.0 6.45 Vp
41.9600 141.8862 20.0 0.0 6.45 Vp
42.0311 141.8114 20.0 0.1 6.45 Vp
42.1021 141.7364 20.0 38.3 6.45 Vp
42.1730 141.6613 20.0 41.9 6.45 Vp
42.2440 141.5860 20.0 66.6 6.45 Vp
42.3148 141.5106 20.0 10.9 6.47 Vp
42.3856 141.4350 20.0 301.5 6.65 Vp
42.4564 141.3592 20.0 1976.5 6.85 Vp
42.5271 141.2832 20.0 1258.5 6.66 Vp
42.5978 141.2071 20.0 661.0 6.67 Vp
42.6684 141.1308 20.0 508.4 6.53 Vp
42.7389 141.0543 20.0 395.4 6.51 Vp
42.8094 140.9777 20.0 108.3 6.48 Vp
42.8799 140.9009 20.0 0.0 6.66 Vp
41.5164 142.5003 20.0 0.0 6.45 Vp
41.5878 142.4267 20.0 0.0 6.45 Vp
41.6592 142.3530 20.0 0.0 6.45 Vp
41.7306 142.2791 20.0 0.0 6.45 Vp
41.8019 142.2050 20.0 0.0 6.45 Vp
41.8731 142.1308 20.0 0.0 6.45 Vp
41.9443 142.0564 20.0 0.0 6.45 Vp
42.0155 141.9818 20.0 0.0 6.45 Vp
42.0866 141.9071 20.0 8.1 6.45 Vp
42.1577 141.8322 20.0 34.9 6.45 Vp
42.2287 141.7571 20.0 29.2 6.45 Vp
42.2997 141.6819 20.0 61.0 6.45 Vp
42.3706 141.6065 20.0 22.9 6.42 Vp
42.4415 141.5309 20.0 420.4 6.43 Vp
42.5123 141.4551 20.0 518.7 6.64 Vp
42.5831 141.3792 20.0 630.3 6.64 Vp
42.6538 141.3031 20.0 711.7 6.65 Vp
42.7245 141.2269 20.0 598.2 6.50 Vp
42.7951 141.1504 20.0 193.0 6.53 Vp
42.8657 141.0738 20.0 30.6 6.65 Vp
42.9362 140.9970 20.0 0.0 6.43 Vp
41.5714 142.5958 20.0 0.0 6.45 Vp
41.6429 142.5223 20.0 0.0 6.45 Vp
41.7143 142.4486 20.0 0.0 6.45 Vp
41.7857 142.3748 20.0 0.0 6.45 Vp
41.8571 142.3008 20.0 0.0 6.45 Vp
41.9284 142.2266 20.0 0.0 6.45 Vp
41.9997 142.1522 20.0 0.0 6.45 Vp
42.0709 142.0777 20.0 0.2 6.45 Vp
42.1421 142.0030 20.0 25.1 6.40 Vp
42.2133 141.9281 20.0 50.4 6.44 Vp
42.2843 141.8531 20.0 38.5 6.36 Vp
42.3554 141.7779 20.0 60.2 6.45 Vp
42.4264 141.7025 20.0 72.4 6.44 Vp
42.4973 141.6270 20.0 403.5 6.45 Vp
42.5682 141.5513 20.0 411.1 6.61 Vp
42.6390 141.4754 20.0 426.6 6.49 Vp
42.7098 141.3993 20.0 383.2 6.46 Vp
42.7806 141.3231 20.0 157.1 6.42 Vp
42.8512 141.2467 20.0 48.9 6.56 Vp
42.9219 141.1702 20.0 0.4 6.30 Vp
42.9924 141.0934 20.0 0.0 6.42 Vp
41.6263 142.6915 20.0 0.0 6.45 Vp
41.6978 142.6181 20.0 0.0 6.45 Vp
41.7693 142.5444 20.0 0.0 6.45 Vp
41.8408 142.4706 20.0 0.0 6.45 Vp
41.9123 142.3966 20.0 0.0 6.45 Vp
41.9836 142.3225 20.0 0.0 6.46 Vp
42.0550 142.2482 20.0 12.2 6.36 Vp
42.1263 142.1737 20.0 24.3 6.24 Vp
42.1975 142.0990 20.0 72.3 6.17 Vp
42.2687 142.0242 20.0 85.8 5.72 Vp
42.3399 141.9492 20.0 91.3 5.89 Vp
42.4110 141.8741 20.0 228.6 6.32 Vp
42.4820 141.7987 20.0 293.3 6.42 Vp
42.5530 141.7233 20.0 316.7 6.46 Vp
42.6240 141.6476 20.0 408.8 6.51 Vp
42.6949 141.5717 20.0 1307.3 6.32 Vp
42.7657 141.4957 20.0 1073.1 6.34 Vp
42.8365 141.4195 20.0 709.8 6.41 Vp
42.9073 141.3432 20.0 17.3 6.32 Vp
42.9780 141.2666 20.0 1.7 6.38 Vp
43.0486 141.1899 20.0 0.0 6.35 Vp
41.6811 142.7874 20.0 0.0 6.45 Vp
41.7527 142.7140 20.0 0.0 6.45 Vp
41.8243 142.6404 20.0 0.0 6.45 Vp
41.8958 142.5666 20.0 9.0 6.45 Vp
41.9673 142.4927 20.0 16.7 6.17 Vp
42.0388 142.4186 20.0 1.5 6.27 Vp
42.1102 142.3443 20.0 89.2 5.79 Vp
42.1815 142.2699 20.0 296.5 5.67 Vp
42.2528 142.1953 20.0 147.0 5.48 Vp
42.3241 142.1205 20.0 140.8 5.47 Vp
42.3953 142.0455 20.0 301.8 5.39 Vp
42.4665 141.9704 20.0 849.7 6.12 Vp
42.5376 141.8951 20.0 1531.0 6.91 Vp
42.6087 141.8197 20.0 1505.8 7.10 Vp
42.6797 141.7440 20.0 612.3 6.47 Vp
42.7507 141.6682 20.0 1212.3 6.14 Vp
42.8216 141.5923 20.0 2083.5 6.51 Vp
42.8924 141.5161 20.0 1033.0 5.84 Vp
42.9632 141.4398 20.0 198.3 6.25 Vp
43.0340 141.3633 20.0 1.4 6.39 Vp
43.1047 141.2867 20.0 0.0 6.43 Vp
41.7358 142.8835 20.0 0.0 6.45 Vp
41.8075 142.8101 20.0 0.0 6.45 Vp
41.8792 142.7365 20.0 0.0 6.41 Vp
41.9508 142.6628 20.0 76.0 6.48 Vp
42.0223 142.5889 20.0 133.2 6.09 Vp
42.0938 142.5148 20.0 152.1 6.39 Vp
42.1653 142.4406 20.0 428.4 5.91 Vp
42.2367 142.3662 20.0 597.2 6.01 Vp
42.3081 142.2917 20.0 580.4 6.01 Vp
42.3794 142.2169 20.0 412.5 5.38 Vp
42.4507 142.1420 20.0 560.9 5.40 Vp
42.5219 142.0669 20.0 761.4 5.68 Vp
42.5931 141.9917 20.0 1579.5 6.11 Vp
42.6642 141.9163 20.0 1264.7 5.94 Vp
42.7353 141.8407 20.0 1022.3 7.09 Vp
42.8064 141.7649 20.0 751.7 6.13 Vp
42.8773 141.6890 20.0 985.5 6.41 Vp
42.9482 141.6129 20.0 418.8 6.16 Vp
43.0191 141.5366 20.0 126.5 6.45 Vp
43.0899 141.4602 20.0 0.2 6.29 Vp
43.1607 141.3835 20.0 0.0 6.44 Vp
41.7632 142.9315 20.0 0.0 6.40 Vp
41.8349 142.8582 20.0 0.0 6.35 Vp
41.9066 142.7846 20.0 0.6 6.30 Vp
41.9782 142.7109 20.0 20.0 5.87 Vp
42.0498 142.6371 20.0 77.2 5.63 Vp
42.1213 142.5630 20.0 629.8 6.54 Vp
42.1928 142.4888 20.0 909.9 5.91 Vp
42.2643 142.4145 20.0 577.1 6.03 Vp
42.3357 142.3399 20.0 528.6 5.84 Vp
42.4070 142.2652 20.0 428.4 5.47 Vp
42.4784 142.1903 20.0 670.9 5.47 Vp
42.5496 142.1153 20.0 317.5 5.35 Vp
42.6208 142.0400 20.0 274.2 5.78 Vp
42.6920 141.9646 20.0 457.1 5.90 Vp
42.7631 141.8891 20.0 771.2 6.87 Vp
42.8342 141.8134 20.0 751.6 6.65 Vp
42.9052 141.7374 20.0 273.9 6.03 Vp
42.9761 141.6613 20.0 96.4 5.80 Vp
43.0470 141.5851 20.0 14.4 6.17 Vp
43.1179 141.5087 20.0 0.0 6.19 Vp
43.1887 141.4321 20.0 0.0 6.35 Vp
41.7905 142.9796 20.0 0.0 6.37 Vp
41.8622 142.9063 20.0 3.2 6.36 Vp
41.9339 142.8328 20.0 16.8 6.20 Vp
42.0056 142.7591 20.0 44.8 5.66 Vp
42.0772 142.6853 20.0 214.6 5.69 Vp
42.1488 142.6113 20.0 1778.9 6.70 Vp
42.2203 142.5371 20.0 1807.7 6.42 Vp
42.2918 142.4628 20.0 1199.9 6.37 Vp
42.3633 142.3882 20.0 708.9 5.78 Vp
42.4346 142.3135 20.0 567.0 5.48 Vp
42.5060 142.2387 20.0 608.9 5.26 Vp
42.5773 142.1636 20.0 326.4 5.25 Vp
42.6485 142.0884 20.0 571.0 6.14 Vp
42.7197 142.0131 20.0 744.5 5.75 Vp
42.7909 141.9375 20.0 506.1 5.63 Vp
42.8620 141.8618 20.0 678.6 6.65 Vp
42.9330 141.7859 20.0 217.0 6.26 Vp
43.0040 141.7098 20.0 53.2 6.26 Vp
43.0749 141.6336 20.0 11.3 6.14 Vp
43.1458 141.5572 20.0 0.0 6.22 Vp
43.2166 141.4806 20.0 0.0 6.39 Vp
41.8178 143.0278 20.0 0.0 6.36 Vp
41.8896 142.9545 20.0 108.0 6.16 Vp
41.9613 142.8810 20.0 233.2 6.11 Vp
42.0330 142.8074 20.0 71.9 6.02 Vp
42.1047 142.7335 20.0 504.8 5.99 Vp
42.1763 142.6596 20.0 2253.6 6.23 Vp
42.2478 142.5854 20.0 3068.8 6.35 Vp
42.3193 142.5111 20.0 3103.4 6.59 Vp
42.3908 142.4366 20.0 1093.5 5.85 Vp
42.4622 142.3619 20.0 543.7 5.54 Vp
42.5336 142.2871 20.0 612.2 5.27 Vp
42.6049 142.2121 20.0 393.8 5.13 Vp
42.6762 142.1369 20.0 427.1 5.59 Vp
42.7474 142.0615 20.0 622.2 5.77 Vp
42.8186 141.9860 20.0 473.0 5.73 Vp
42.8897 141.9103 20.0 489.6 6.32 Vp
42.9608 141.8344 20.0 652.7 6.73 Vp
43.0318 141.7584 20.0 167.1 6.54 Vp
43.1028 141.6822 20.0 12.1 6.42 Vp
43.1737 141.6058 20.0 0.0 6.35 Vp
43.2446 141.5292 20.0 0.0 6.37 Vp
41.8451 143.0760 20.0 0.0 6.29 Vp
41.9169 143.0027 20.0 284.4 6.17 Vp
41.9886 142.9293 20.0 663.0 5.94 Vp
42.0604 142.8556 20.0 418.9 6.15 Vp
42.1321 142.7818 20.0 1181.2 6.21 Vp
42.2037 142.7079 20.0 2103.5 6.05 Vp
42.2753 142.6337 20.0 3197.6 6.16 Vp
42.3468 142.5594 20.0 4092.8 6.26 Vp
42.4183 142.4850 20.0 3062.9 6.32 Vp
42.4898 142.4103 20.0 1921.4 5.67 Vp
42.5612 142.3355 20.0 537.3 5.09 Vp
42.6326 142.2605 20.0 293.9 5.16 Vp
42.7039 142.1854 20.0 568.8 5.51 Vp
42.7751 142.1100 20.0 438.2 5.66 Vp
42.8463 142.0345 20.0 192.1 5.18 Vp
42.9175 141.9588 20.0 295.8 5.75 Vp
42.9886 141.8830 20.0 708.9 6.33 Vp
43.0596 141.8070 20.0 653.9 6.50 Vp
43.1306 141.7308 20.0 15.0 6.40 Vp
43.2016 141.6544 20.0 0.0 6.34 Vp
43.2725 141.5779 20.0 0.0 6.41 Vp
41.8723 143.1243 20.0 0.0 6.24 Vp
41.9442 143.0510 20.0 237.3 6.05 Vp
42.0160 142.9776 20.0 1121.4 6.14 Vp
42.0877 142.9039 20.0 1227.1 6.36 Vp
42.1594 142.8302 20.0 3331.0 6.56 Vp
42.2311 142.7562 20.0 2870.0 6.20 Vp
42.3027 142.6821 20.0 3672.8 6.80 Vp
42.3743 142.6078 20.0 3728.1 6.77 Vp
42.4459 142.5334 20.0 4923.5 6.39 Vp
42.5173 142.4588 20.0 4404.9 6.06 Vp
42.5888 142.3840 20.0 2226.4 6.01 Vp
42.6602 142.3090 20.0 840.8 5.53 Vp
42.7315 142.2339 20.0 1276.0 5.86 Vp
42.8028 142.1586 20.0 900.1 5.51 Vp
42.8740 142.0831 20.0 651.7 5.39 Vp
42.9452 142.0074 20.0 721.6 6.05 Vp
43.0163 141.9316 20.0 515.4 6.04 Vp
43.0874 141.8556 20.0 453.4 6.32 Vp
43.1585 141.7794 20.0 124.6 6.76 Vp
43.2294 141.7031 20.0 0.0 6.54 Vp
43.3004 141.6266 20.0 0.0 6.45 Vp
41.8996 143.1725 20.0 0.0 6.23 Vp
41.9714 143.0993 20.0 61.9 6.08 Vp
42.0433 143.0259 20.0 811.9 5.96 Vp
42.1151 142.9523 20.0 1204.4 6.17 Vp
42.1868 142.8786 20.0 2638.8 6.24 Vp
42.2585 142.8046 20.0 2153.8 6.07 Vp
42.3302 142.7306 20.0 2044.5 5.66 Vp
42.4018 142.6563 20.0 1755.0 5.84 Vp
42.4733 142.5819 20.0 1958.1 6.10 Vp
42.5449 142.5073 20.0 3148.3 6.25 Vp
42.6163 142.4325 20.0 4437.9 6.69 Vp
42.6878 142.3576 20.0 1991.2 5.96 Vp
42.7591 142.2824 20.0 1499.8 5.62 Vp
42.8304 142.2072 20.0 971.1 5.73 Vp
42.9017 142.1317 20.0 1062.9 5.96 Vp
42.9729 142.0561 20.0 420.1 5.87 Vp
43.0441 141.9803 20.0 328.8 5.94 Vp
43.1152 141.9043 20.0 1097.4 6.51 Vp
43.1863 141.8281 20.0 392.7 7.03 Vp
43.2573 141.7518 20.0 0.0 6.52 Vp
43.3282 141.6753 20.0 0.0 6.43 Vp
41.9268 143.2209 20.0 0.0 6.16 Vp
41.9987 143.1476 20.0 87.3 5.91 Vp
42.0706 143.0742 20.0 928.8 5.80 Vp
42.1424 143.0007 20.0 534.1 5.52 Vp
42.2142 142.9270 20.0 1248.1 6.02 Vp
42.2859 142.8531 20.0 3968.6 7.43 Vp
42.3576 142.7790 20.0 3584.2 6.90 Vp
42.4292 142.7048 20.0 2275.7 6.49 Vp
42.5008 142.6304 20.0 1223.2 6.16 Vp
42.5724 142.5558 20.0 1045.8 5.55 Vp
42.6439 142.4811 20.0 2572.8 6.00 Vp
42.7153 142.4061 20.0 2182.4 6.00 Vp
42.7867 142.3311 20.0 761.9 5.64 Vp
42.8581 142.2558 20.0 322.4 5.94 Vp
42.9294 142.1803 20.0 200.3 5.78 Vp
43.0006 142.1047 20.0 199.0 5.85 Vp
43.0718 142.0289 20.0 185.7 5.58 Vp
43.1430 141.9530 20.0 342.3 6.22 Vp
43.2141 141.8769 20.0 394.0 6.69 Vp
43.2851 141.8006 20.0 0.0 6.49 Vp
43.3561 141.7241 20.0 0.0 6.45 Vp
41.9540 143.2692 20.0 0.0 6.18 Vp
42.0259 143.1960 20.0 102.7 5.94 Vp
42.0978 143.1227 20.0 805.8 5.78 Vp
42.1697 143.0491 20.0 856.1 6.10 Vp
42.2415 142.9754 20.0 2711.1 6.34 Vp
42.3132 142.9016 20.0 3707.7 6.40 Vp
42.3850 142.8275 20.0 2622.5 6.34 Vp
42.4566 142.7533 20.0 3186.6 7.04 Vp
42.5283 142.6790 20.0 1844.9 6.26 Vp
42.5998 142.6044 20.0 636.9 6.15 Vp
42.6714 142.5297 20.0 617.3 6.12 Vp
42.7429 142.4548 20.0 2641.6 7.01 Vp
42.8143 142.3797 20.0 1227.1 5.86 Vp
42.8857 142.3045 20.0 212.8 5.86 Vp
42.9570 142.2290 20.0 180.9 5.67 Vp
43.0283 142.1535 20.0 114.9 5.63 Vp
43.0995 142.0777 20.0 549.7 6.08 Vp
43.1707 142.0018 20.0 415.8 6.18 Vp
43.2418 141.9256 20.0 223.0 6.69 Vp
43.3129 141.8493 20.0 0.0 6.50 Vp
43.3839 141.7729 20.0 0.0 6.39 Vp
41.9812 143.3176 20.0 0.0 6.05 Vp
42.0531 143.2445 20.0 85.8 5.81 Vp
42.1251 143.1711 20.0 578.4 6.24 Vp
42.1969 143.0976 20.0 1535.1 6.23 Vp
42.2688 143.0240 20.0 1583.6 6.01 Vp
42.3406 142.9501 20.0 808.8 5.46 Vp
42.4123 142.8761 20.0 1152.2 5.57 Vp
42.4840 142.8019 20.0 1654.8 6.32 Vp
42.5557 142.7276 20.0 1176.3 6.03 Vp
42.6273 142.6530 20.0 1378.4 6.76 Vp
42.6989 142.5783 20.0 710.7 6.10 Vp
42.7704 142.5034 20.0 1631.5 6.44 Vp
42.8418 142.4284 20.0 1560.6 6.73 Vp
42.9133 142.3532 20.0 316.3 6.26 Vp
42.9846 142.2778 20.0 96.6 5.67 Vp
43.0559 142.2022 20.0 43.5 5.56 Vp
43.1272 142.1265 20.0 125.5 5.64 Vp
43.1984 142.0506 20.0 132.1 5.92 Vp
43.2696 141.9745 20.0 32.4 6.36 Vp
43.3407 141.8982 20.0 0.0 6.29 Vp
43.4117 141.8218 20.0 0.0 6.31 Vp
42.0083 143.3661 20.0 0.0 6.21 Vp
42.0803 143.2929 20.0 47.2 6.44 Vp
42.1523 143.2196 20.0 230.9 6.09 Vp
42.2242 143.1461 20.0 546.1 6.19 Vp
42.2961 143.0725 20.0 797.8 5.81 Vp
42.3679 142.9987 20.0 1404.8 6.17 Vp
42.4397 142.9247 20.0 2953.3 6.83 Vp
42.5114 142.8505 20.0 1828.7 6.89 Vp
42.5831 142.7762 20.0 2036.2 7.35 Vp
42.6547 142.7017 20.0 2885.1 7.01 Vp
42.7263 142.6270 20.0 1308.3 6.60 Vp
42.7979 142.5522 20.0 1073.5 6.00 Vp
42.8694 142.4771 20.0 951.4 5.93 Vp
42.9408 142.4019 20.0 354.6 6.46 Vp
43.0122 142.3266 20.0 52.8 5.92 Vp
43.0836 142.2510 20.0 29.0 5.77 Vp
43.1549 142.1753 20.0 92.9 5.88 Vp
43.2261 142.0994 20.0 75.9 5.96 Vp
43.2973 142.0233 20.0 9.4 6.03 Vp
43.3684 141.9471 20.0 0.0 6.36 Vp
43.4395 141.8707 20.0 0.0 6.15 Vp
42.0354 143.4146 20.0 0.0 5.98 Vp
42.1075 143.3414 20.0 11.7 6.45 Vp
42.1795 143.2682 20.0 463.7 6.35 Vp
42.2514 143.1947 20.0 759.3 6.60 Vp
42.3233 143.1211 20.0 1135.3 6.27 Vp
42.3952 143.0473 20.0 3545.0 7.26 Vp
42.4670 142.9733 20.0 5618.3 7.80 Vp
42.5388 142.8992 20.0 2966.7 7.44 Vp
42.6105 142.8249 20.0 3074.3 6.88 Vp
42.6822 142.7504 20.0 2985.4 7.11 Vp
42.7538 142.6757 20.0 1220.6 6.41 Vp
42.8254 142.6009 20.0 478.2 6.47 Vp
42.8969 142.5259 20.0 420.6 6.30 Vp
42.9684 142.4507 20.0 271.7 6.33 Vp
43.0398 142.3754 20.0 104.8 6.03 Vp
43.1112 142.2999 20.0 51.2 5.60 Vp
43.1825 142.2242 20.0 209.9 5.87 Vp
43.2538 142.1483 20.0 70.1 6.10 Vp
43.3250 142.0723 20.0 6.2 5.87 Vp
43.3962 141.9960 20.0 0.0 6.15 Vp
43.4673 141.9196 20.0 0.0 5.82 Vp
42.0626 143.4631 20.0 0.0 6.45 Vp
42.1346 143.3900 20.0 1.4 6.45 Vp
42.2067 143.3168 20.0 345.0 6.29 Vp
42.2786 143.2433 20.0 956.9 6.71 Vp
42.3506 143.1697 20.0 2422.9 7.07 Vp
42.4225 143.0959 20.0 6579.1 7.88 Vp
42.4943 143.0220 20.0 3144.4 7.46 Vp
42.5661 142.9479 20.0 1308.1 7.12 Vp
42.6379 142.8736 20.0 2870.5 8.02 Vp
42.7096 142.7991 20.0 1894.4 6.59 Vp
42.7812 142.7245 20.0 531.7 5.88 Vp
42.8528 142.6497 20.0 288.8 5.88 Vp
42.9244 142.5747 20.0 529.4 6.40 Vp
42.9959 142.4996 20.0 568.4 6.47 Vp
43.0674 142.4243 20.0 144.2 6.31 Vp
43.1388 142.3488 20.0 86.5 6.12 Vp
43.2101 142.2731 20.0 76.4 6.00 Vp
43.2814 142.1973 20.0 20.4 5.96 Vp
43.3527 142.1212 20.0 3.9 5.90 Vp
43.4239 142.0450 20.0 0.0 6.33 Vp
43.4950 141.9686 20.0 0.0 6.02 Vp
42.0897 143.5117 20.0 0.0 6.45 Vp
42.1618 143.4386 20.0 1.8 6.45 Vp
42.2338 143.3654 20.0 87.9 6.41 Vp
42.3058 143.2920 20.0 589.8 6.15 Vp
42.3778 143.2184 20.0 1671.8 6.98 Vp
42.4497 143.1447 20.0 2477.5 6.74 Vp
42.5216 143.0707 20.0 2662.1 7.10 Vp
42.5934 142.9966 20.0 1964.5 7.29 Vp
42.6652 142.9224 20.0 2714.3 7.77 Vp
42.7369 142.8479 20.0 2402.8 8.51 Vp
42.8086 142.7733 20.0 1291.6 7.88 Vp
42.8803 142.6985 20.0 594.8 6.95 Vp
42.9519 142.6236 20.0 584.9 6.30 Vp
43.0234 142.5485 20.0 1417.9 7.23 Vp
43.0949 142.4732 20.0 241.8 6.30 Vp
43.1663 142.3977 20.0 298.7 6.57 Vp
43.2377 142.3221 20.0 274.2 6.34 Vp
43.3091 142.2462 20.0 68.9 6.15 Vp
43.3803 142.1702 20.0 2.8 5.87 Vp
43.4516 142.0940 20.0 0.0 5.75 Vp
43.5227 142.0177 20.0 0.0 5.76 Vp
42.1167 143.5603 20.0 0.0 6.45 Vp
42.1889 143.4872 20.0 0.2 6.45 Vp
42.2610 143.4140 20.0 4.3 6.39 Vp
42.3330 143.3407 20.0 684.1 5.59 Vp
42.4050 143.2671 20.0 1406.6 7.23 Vp
42.4769 143.1934 20.0 2516.3 6.17 Vp
42.5489 143.1195 20.0 2227.8 6.16 Vp
42.6207 143.0454 20.0 1053.6 6.26 Vp
42.6925 142.9712 20.0 1662.7 6.97 Vp
42.7643 142.8968 20.0 2677.2 7.86 Vp
42.8360 142.8222 20.0 5908.1 8.45 Vp
42.9077 142.7475 20.0 2665.9 7.86 Vp
42.9793 142.6725 20.0 173.0 5.31 Vp
43.0509 142.5974 20.0 797.7 6.67 Vp
43.1224 142.5221 20.0 751.3 6.30 Vp
43.1939 142.4467 20.0 409.3 6.39 Vp
43.2653 142.3710 20.0 514.7 6.20 Vp
43.3367 142.2952 20.0 198.2 6.46 Vp
43.4080 142.2193 20.0 2.5 5.80 Vp
43.4792 142.1431 20.0 0.0 5.94 Vp
43.5504 142.0668 20.0 0.0 5.73 Vp
42.1438 143.6089 20.0 0.0 6.45 Vp
42.2160 143.5359 20.0 0.0 6.45 Vp
42.2881 143.4627 20.0 3.6 6.45 Vp
42.3601 143.3894 20.0 55.7 6.07 Vp
42.4322 143.3159 20.0 479.2 6.61 Vp
42.5042 143.2422 20.0 3537.8 6.06 Vp
42.5761 143.1683 20.0 3768.0 6.73 Vp
42.6480 143.0943 20.0 1213.8 6.24 Vp
42.7198 143.0201 20.0 1011.5 6.54 Vp
42.7916 142.9457 20.0 649.5 6.23 Vp
42.8634 142.8711 20.0 2585.8 6.45 Vp
42.9351 142.7964 20.0 3065.9 8.43 Vp
43.0067 142.7215 20.0 912.5 6.29 Vp
43.0783 142.6464 20.0 425.4 6.29 Vp
43.1499 142.5711 20.0 590.0 6.11 Vp
43.2214 142.4957 20.0 249.6 6.03 Vp
43.2928 142.4201 20.0 420.7 6.36 Vp
43.3642 142.3443 20.0 418.2 6.39 Vp
43.4356 142.2684 20.0 74.0 6.60 Vp
43.5069 142.1922 20.0 0.0 5.92 Vp
43.5781 142.1159 20.0 0.0 5.85 Vp
42.1708 143.6576 20.0 0.0 6.45 Vp
42.2430 143.5847 20.0 0.0 6.45 Vp
42.3152 143.5115 20.0 0.1 6.44 Vp
42.3873 143.4382 20.0 22.6 6.55 Vp
42.4593 143.3647 20.0 141.1 6.42 Vp
42.5313 143.2910 20.0 1213.6 6.32 Vp
42.6033 143.2172 20.0 1933.7 6.73 Vp
42.6752 143.1431 20.0 2729.1 7.00 Vp
42.7471 143.0689 20.0 1207.7 6.33 Vp
42.8189 142.9946 20.0 1947.4 7.06 Vp
42.8907 142.9201 20.0 2280.6 6.74 Vp
42.9625 142.8454 20.0 3005.8 7.19 Vp
43.0341 142.7705 20.0 1035.5 6.08 Vp
43.1058 142.6954 20.0 1073.9 6.39 Vp
43.1774 142.6202 20.0 810.5 7.00 Vp
43.2489 142.5448 20.0 206.0 6.00 Vp
43.3204 142.4692 20.0 277.1 6.00 Vp
43.3918 142.3934 20.0 115.9 6.14 Vp
43.4632 142.3175 20.0 49.4 6.14 Vp
43.5345 142.2414 20.0 0.0 5.90 Vp
43.6058 142.1651 20.0 0.0 5.84 Vp
42.1978 143.7064 20.0 0.0 6.45 Vp
42.2701 143.6334 20.0 0.0 6.45 Vp
42.3422 143.5603 20.0 0.0 6.45 Vp
42.4144 143.4870 20.0 13.6 6.45 Vp
42.4865 143.4135 20.0 47.4 5.61 Vp
42.5585 143.3399 20.0 467.7 6.08 Vp
42.6305 143.2661 20.0 2828.8 7.45 Vp
42.7025 143.1920 20.0 2130.5 7.31 Vp
42.7744 143.1179 20.0 716.5 6.35 Vp
42.8462 143.0435 20.0 773.2 5.82 Vp
42.9181 142.9690 20.0 815.6 5.96 Vp
42.9898 142.8944 20.0 1946.9 6.51 Vp
43.0615 142.8195 20.0 1343.9 6.32 Vp
43.1332 142.7445 20.0 880.3 6.44 Vp
43.2048 142.6693 20.0 391.8 5.78 Vp
43.2764 142.5939 20.0 133.2 6.03 Vp
43.3479 142.5183 20.0 270.7 5.94 Vp
43.4194 142.4426 20.0 108.3 5.96 Vp
43.4908 142.3667 20.0 93.2 6.15 Vp
43.5621 142.2906 20.0 0.0 6.32 Vp
43.6334 142.2143 20.0 0.0 6.11 Vp
42.2248 143.7552 20.0 0.0 6.45 Vp
42.2971 143.6822 20.0 0.0 6.45 Vp
42.3693 143.6091 20.0 0.0 6.45 Vp
42.4415 143.5358 20.0 16.2 6.46 Vp
42.5136 143.4624 20.0 36.2 5.64 Vp
42.5857 143.3888 20.0 654.5 6.01 Vp
42.6577 143.3150 20.0 2435.7 6.36 Vp
42.7297 143.2410 20.0 1083.1 7.19 Vp
42.8016 143.1669 20.0 719.3 6.41 Vp
42.8735 143.0926 20.0 845.3 6.09 Vp
42.9454 143.0181 20.0 176.2 6.07 Vp
43.0172 142.9434 20.0 700.5 6.24 Vp
43.0889 142.8686 20.0 1378.9 6.10 Vp
43.1606 142.7936 20.0 300.6 6.29 Vp
43.2322 142.7184 20.0 146.7 5.76 Vp
43.3038 142.6430 20.0 189.0 6.09 Vp
43.3754 142.5675 20.0 367.4 6.19 Vp
43.4469 142.4918 20.0 174.1 6.01 Vp
43.5183 142.4159 20.0 149.6 6.24 Vp
43.5897 142.3398 20.0 0.0 6.19 Vp
43.6610 142.2636 20.0 0.0 6.12 Vp
42.2518 143.8040 20.0 0.0 6.45 Vp
42.3241 143.7311 20.0 0.0 6.45 Vp
42.3963 143.6580 20.0 0.0 6.45 Vp
42.4685 143.5847 20.0 13.6 6.45 Vp
42.5407 143.5113 20.0 33.9 5.89 Vp
42.6128 143.4377 20.0 1386.0 6.78 Vp
42.6848 143.3640 20.0 4197.1 7.07 Vp
42.7569 143.2900 20.0 774.5 6.23 Vp
42.8288 143.2159 20.0 674.0 6.92 Vp
42.9008 143.1416 20.0 831.4 6.24 Vp
42.9726 143.0672 20.0 302.3 6.52 Vp
43.0445 142.9925 20.0 541.6 6.30 Vp
43.1162 142.9177 20.0 1515.0 6.09 Vp
43.1880 142.8427 20.0 1119.8 6.56 Vp
43.2596 142.7676 20.0 86.7 5.83 Vp
43.3313 142.6922 20.0 193.1 6.24 Vp
43.4029 142.6167 20.0 507.5 6.87 Vp
43.4744 142.5410 20.0 313.4 6.43 Vp
43.5458 142.4652 20.0 11.9 6.42 Vp
43.6173 142.3891 20.0 0.0 6.42 Vp
43.6886 142.3129 20.0 0.0 6.36 Vp
42.2787 143.8528 20.0 0.0 6.45 Vp
42.3511 143.7800 20.0 0.0 6.45 Vp
42.4233 143.7069 20.0 0.0 6.45 Vp
42.4956 143.6337 20.0 9.4 6.45 Vp
42.5677 143.5603 20.0 39.4 5.58 Vp
42.6399 143.4867 20.0 291.9 5.72 Vp
42.7120 143.4130 20.0 804.1 5.93 Vp
42.7840 143.3391 20.0 346.1 5.89 Vp
42.8560 143.2650 20.0 371.0 6.13 Vp
42.9280 143.1907 20.0 296.9 6.13 Vp
42.9999 143.1163 20.0 420.5 6.29 Vp
43.0718 143.0417 20.0 1478.7 6.56 Vp
43.1436 142.9669 20.0 1206.4 5.81 Vp
43.2153 142.8919 20.0 1466.4 6.48 Vp
43.2870 142.8168 20.0 146.8 5.83 Vp
43.3587 142.7415 20.0 294.1 6.14 Vp
43.4303 142.6660 20.0 340.2 6.45 Vp
43.5019 142.5903 20.0 147.4 6.40 Vp
43.5734 142.5145 20.0 0.6 6.45 Vp
43.6448 142.4385 20.0 0.0 6.41 Vp
43.7162 142.3623 20.0 0.0 6.36 Vp
42.3057 143.9017 20.0 0.0 6.45 Vp
42.3780 143.8289 20.0 0.0 6.45 Vp
42.4503 143.7559 20.0 0.0 6.45 Vp
42.5226 143.6826 20.0 1.8 6.45 Vp
42.5948 143.6093 20.0 27.1 5.78 Vp
42.6670 143.5358 20.0 164.8 5.65 Vp
42.7391 143.4620 20.0 639.9 6.28 Vp
42.8112 143.3881 20.0 630.8 6.31 Vp
42.8832 143.3141 20.0 203.7 5.82 Vp
42.9552 143.2398 20.0 172.4 6.04 Vp
43.0271 143.1654 20.0 314.8 6.32 Vp
43.0990 143.0908 20.0 948.3 6.38 Vp
43.1709 143.0161 20.0 2314.7 6.52 Vp
43.2427 142.9411 20.0 545.5 6.07 Vp
43.3144 142.8660 20.0 46.4 5.85 Vp
43.3861 142.7908 20.0 38.4 6.01 Vp
43.4577 142.7153 20.0 30.9 6.30 Vp
43.5293 142.6396 20.0 22.9 6.43 Vp
43.6008 142.5638 20.0 0.8 6.45 Vp
43.6723 142.4878 20.0 0.0 6.45 Vp
43.7438 142.4117 20.0 0.0 6.45 Vp
42.3326 143.9507 20.0 0.0 6.45 Vp
42.4050 143.8778 20.0 0.0 6.45 Vp
42.4773 143.8048 20.0 0.0 6.45 Vp
42.5496 143.7317 20.0 0.6 6.45 Vp
42.6218 143.6583 20.0 25.9 6.28 Vp
42.6940 143.5848 20.0 94.7 5.80 Vp
42.7662 143.5111 20.0 1319.5 6.24 Vp
42.8383 143.4373 20.0 1382.9 6.38 Vp
42.9104 143.3632 20.0 396.5 6.26 Vp
42.9824 143.2890 20.0 358.3 6.18 Vp
43.0543 143.2146 20.0 213.0 6.24 Vp
43.1263 143.1401 20.0 812.1 6.15 Vp
43.1981 143.0653 20.0 2071.2 6.41 Vp
43.2700 142.9904 20.0 437.9 6.09 Vp
43.3417 142.9153 20.0 190.3 5.89 Vp
43.4135 142.8401 20.0 24.7 6.35 Vp
43.4851 142.7646 20.0 12.2 6.45 Vp
43.5567 142.6890 20.0 0.6 6.45 Vp
43.6283 142.6133 20.0 0.3 6.45 Vp
43.6998 142.5373 20.0 0.0 6.45 Vp
43.7713 142.4611 20.0 0.0 6.45 Vp
42.3595 143.9996 20.0 0.0 6.45 Vp
42.4319 143.9268 20.0 0.0 6.45 Vp
42.5042 143.8539 20.0 0.0 6.45 Vp
42.5766 143.7807 20.0 0.1 6.45 Vp
42.6488 143.7074 20.0 15.9 6.45 Vp
42.7211 143.6339 20.0 131.7 6.10 Vp
42.7933 143.5603 20.0 1639.1 6.02 Vp
42.8654 143.4864 20.0 1770.3 6.11 Vp
42.9375 143.4124 20.0 345.4 6.24 Vp
43.0095 143.3382 20.0 246.2 5.77 Vp
43.0815 143.2639 20.0 118.8 6.21 Vp
43.1535 143.1893 20.0 136.3 6.21 Vp
43.2254 143.1146 20.0 779.5 6.34 Vp
43.2972 143.0397 20.0 422.2 6.51 Vp
43.3691 142.9647 20.0 191.3 6.09 Vp
43.4408 142.8895 20.0 21.5 6.45 Vp
43.5125 142.8140 20.0 3.4 6.45 Vp
43.5842 142.7384 20.0 1.2 6.45 Vp
43.6558 142.6627 20.0 0.7 6.41 Vp
43.7273 142.5867 20.0 0.0 6.41 Vp
43.7988 142.5106 20.0 0.0 6.41 Vp
42.3863 144.0487 20.0 0.0 6.45 Vp
42.4588 143.9759 20.0 0.0 6.45 Vp
42.5312 143.9030 20.0 0.0 6.45 Vp
42.6035 143.8298 20.0 0.0 6.45 Vp
42.6758 143.7565 20.0 8.6 6.50 Vp
42.7481 143.6831 20.0 578.8 6.14 Vp
42.8203 143.6095 20.0 3490.4 6.51 Vp
42.8925 143.5356 20.0 2318.7 5.98 Vp
42.9646 143.4617 20.0 1942.3 6.54 Vp
43.0367 143.3875 20.0 296.0 5.34 Vp
43.1087 143.3132 20.0 1109.7 6.41 Vp
43.1807 143.2387 20.0 228.7 5.83 Vp
43.2526 143.1640 20.0 692.0 6.23 Vp
43.3245 143.0891 20.0 769.1 6.06 Vp
43.3964 143.0141 20.0 176.6 5.99 Vp
43.4681 142.9389 20.0 19.1 6.41 Vp
43.5399 142.8635 20.0 5.9 6.41 Vp
43.6115 142.7879 20.0 13.1 6.41 Vp
43.6832 142.7122 20.0 2.1 6.41 Vp
43.7548 142.6362 20.0 0.0 6.41 Vp
43.8263 142.5602 20.0 0.0 6.41 Vp
42.4400 144.1468 20.0 0.0 6.45 Vp
42.5125 144.0741 20.0 0.0 6.45 Vp
42.5850 144.0012 20.0 0.0 6.45 Vp
42.6574 143.9282 20.0 0.0 6.45 Vp
42.7297 143.8549 20.0 11.9 6.45 Vp
42.8021 143.7815 20.0 1302.4 6.23 Vp
42.8743 143.7079 20.0 5832.5 6.35 Vp
42.9466 143.6342 20.0 3645.7 6.16 Vp
43.0188 143.5603 20.0 1795.1 6.04 Vp
43.0909 143.4862 20.0 740.5 5.88 Vp
43.1630 143.4119 20.0 2148.0 6.45 Vp
43.2350 143.3374 20.0 771.6 5.97 Vp
43.3070 143.2628 20.0 1031.5 6.83 Vp
43.3790 143.1880 20.0 1650.6 6.39 Vp
43.4509 143.1130 20.0 225.4 6.33 Vp
43.5227 143.0378 20.0 31.4 6.16 Vp
43.5945 142.9625 20.0 8.7 6.14 Vp
43.6663 142.8870 20.0 30.2 5.97 Vp
43.7380 142.8113 20.0 5.3 6.41 Vp
43.8096 142.7354 20.0 0.0 6.41 Vp
43.8812 142.6594 20.0 0.0 6.41 Vp
42.4936 144.2452 20.0 0.0 6.41 Vp
42.5661 144.1725 20.0 0.0 6.41 Vp
42.6387 144.0997 20.0 0.0 6.41 Vp
42.7111 144.0267 20.0 0.0 6.41 Vp
42.7836 143.9535 20.0 40.7 6.44 Vp
42.8559 143.8801 20.0 1238.2 5.81 Vp
42.9283 143.8066 20.0 3557.4 5.95 Vp
43.0006 143.7329 20.0 1433.1 6.27 Vp
43.0728 143.6590 20.0 1675.9 6.05 Vp
43.1450 143.5850 20.0 5603.5 6.68 Vp
43.2172 143.5107 20.0 1470.4 6.14 Vp
43.2893 143.4363 20.0 670.5 6.00 Vp
43.3614 143.3618 20.0 173.4 6.39 Vp
43.4334 143.2870 20.0 217.3 6.41 Vp
43.5053 143.2121 20.0 70.2 6.22 Vp
43.5772 143.1370 20.0 39.7 5.88 Vp
43.6491 143.0617 20.0 57.1 5.74 Vp
43.7209 142.9862 20.0 117.5 5.87 Vp
43.7926 142.9106 20.0 68.8 5.96 Vp
43.8643 142.8347 20.0 0.0 6.41 Vp
43.9360 142.7587 20.0 0.0 6.41 Vp
42.5471 144.3437 20.0 0.0 6.41 Vp
42.6197 144.2711 20.0 0.0 6.41 Vp
42.6923 144.1983 20.0 0.0 6.41 Vp
42.7648 144.1253 20.0 0.0 6.41 Vp
42.8373 144.0522 20.0 0.1 6.41 Vp
42.9097 143.9789 20.0 483.0 6.26 Vp
42.9821 143.9054 20.0 1174.4 6.01 Vp
43.0545 143.8318 20.0 969.5 6.18 Vp
43.1268 143.7579 20.0 828.9 5.82 Vp
43.1991 143.6840 20.0 5092.9 6.31 Vp
43.2713 143.6098 20.0 1983.5 6.43 Vp
43.3435 143.5354 20.0 619.8 6.37 Vp
43.4156 143.4609 20.0 508.1 6.45 Vp
43.4877 143.3862 20.0 602.5 6.51 Vp
43.5597 143.3113 20.0 69.9 5.86 Vp
43.6316 143.2363 20.0 37.7 6.44 Vp
43.7036 143.1610 20.0 420.4 6.59 Vp
43.7754 143.0856 20.0 257.0 6.33 Vp
43.8472 143.0100 20.0 31.5 6.37 Vp
43.9190 142.9343 20.0 0.0 6.41 Vp
43.9907 142.8583 20.0 0.0 6.41 Vp
42.6005 144.4423 20.0 0.0 6.41 Vp
42.6731 144.3698 20.0 0.0 6.41 Vp
42.7458 144.2970 20.0 0.0 6.41 Vp
42.8184 144.2242 20.0 0.0 6.41 Vp
42.8909 144.1511 20.0 0.0 6.41 Vp
42.9634 144.0778 20.0 149.5 6.17 Vp
43.0359 144.0044 20.0 596.4 6.19 Vp
43.1083 143.9308 20.0 996.7 6.34 Vp
43.1807 143.8571 20.0 1231.7 6.24 Vp
43.2530 143.7831 20.0 1612.4 6.19 Vp
43.3253 143.7090 20.0 1244.4 6.53 Vp
43.3975 143.6347 20.0 597.2 6.26 Vp
43.4697 143.5602 20.0 233.0 6.58 Vp
43.5419 143.4856 20.0 617.3 6.99 Vp
43.6139 143.4108 20.0 61.7 5.80 Vp
43.6860 143.3358 20.0 0.1 6.41 Vp
43.7579 143.2606 20.0 52.2 6.40 Vp
43.8299 143.1852 20.0 53.4 6.67 Vp
43.9018 143.1097 20.0 12.0 6.41 Vp
43.9736 143.0340 20.0 0.0 6.41 Vp
44.0454 142.9581 20.0 0.0 6.41 Vp
42.6538 144.5411 20.0 0.0 6.41 Vp
42.7265 144.4686 20.0 0.0 6.41 Vp
42.7992 144.3960 20.0 0.0 6.41 Vp
42.8719 144.3231 20.0 0.0 6.41 Vp
42.9445 144.2501 20.0 0.0 6.41 Vp
43.0171 144.1770 20.0 0.0 6.41 Vp
43.0896 144.1036 20.0 0.0 6.41 Vp
43.1621 144.0300 20.0 5.6 6.41 Vp
43.2345 143.9563 20.0 19.4 6.41 Vp
43.3069 143.8824 20.0 10.2 6.42 Vp
43.3792 143.8084 20.0 38.2 6.45 Vp
43.4515 143.7341 20.0 226.4 6.47 Vp
43.5238 143.6597 20.0 43.0 6.39 Vp
43.5960 143.5851 20.0 181.1 6.91 Vp
43.6681 143.5104 20.0 46.0 6.38 Vp
43.7402 143.4354 20.0 0.0 6.41 Vp
43.8122 143.3603 20.0 0.0 6.41 Vp
43.8842 143.2850 20.0 0.0 6.41 Vp
43.9562 143.2095 20.0 0.0 6.41 Vp
44.0281 143.1338 20.0 0.0 6.41 Vp
44.0999 143.0580 20.0 0.0 6.41 Vp
41.0170 141.6474 25.0 0.0 6.70 Vp
41.0879 141.5733 25.0 0.0 6.88 Vp
41.1588 141.4992 25.0 0.0 7.03 Vp
41.2296 141.4249 25.0 0.0 7.27 Vp
41.3004 141.3504 25.0 1.4 7.18 Vp
41.3711 141.2757 25.0 0.8 7.13 Vp
41.4418 141.2009 25.0 0.0 7.01 Vp
41.5125 141.1260 25.0 0.0 6.89 Vp
41.5831 141.0508 25.0 0.0 6.93 Vp
41.6536 140.9755 25.0 0.0 6.52 Vp
41.7241 140.9000 25.0 0.0 6.52 Vp
41.7946 140.8244 25.0 0.0 6.40 Vp
41.8650 140.7486 25.0 0.0 6.44 Vp
41.9353 140.6726 25.0 0.0 6.44 Vp
42.0056 140.5965 25.0 0.0 6.39 Vp
42.0759 140.5202 25.0 0.0 6.72 Vp
42.1461 140.4437 25.0 0.0 6.73 Vp
42.2162 140.3671 25.0 0.0 6.63 Vp
42.2863 140.2903 25.0 0.0 6.77 Vp
42.3564 140.2133 25.0 0.0 7.15 Vp
42.4264 140.1362 25.0 0.0 6.87 Vp
41.0727 141.7415 25.0 0.0 6.70 Vp
41.1437 141.6675 25.0 0.0 6.95 Vp
41.2146 141.5934 25.0 0.0 7.25 Vp
41.2855 141.5191 25.0 0.0 7.34 Vp
41.3563 141.4447 25.0 152.7 7.31 Vp
41.4272 141.3701 25.0 375.3 7.10 Vp
41.4979 141.2953 25.0 66.8 7.13 Vp
41.5686 141.2204 25.0 0.0 6.86 Vp
41.6393 141.1452 25.0 0.0 6.76 Vp
41.7099 141.0700 25.0 3.3 6.57 Vp
41.7805 140.9945 25.0 6.6 6.43 Vp
41.8510 140.9189 25.0 3.1 6.45 Vp
41.9215 140.8432 25.0 8.3 6.39 Vp
41.9919 140.7672 25.0 1.1 6.36 Vp
42.0622 140.6911 25.0 0.3 6.58 Vp
42.1326 140.6149 25.0 0.0 6.94 Vp
42.2028 140.5384 25.0 0.0 7.00 Vp
42.2730 140.4618 25.0 0.0 6.97 Vp
42.3432 140.3850 25.0 0.0 7.18 Vp
42.4133 140.3081 25.0 0.0 6.88 Vp
42.4833 140.2310 25.0 0.0 6.62 Vp
41.1283 141.8358 25.0 0.0 6.70 Vp
41.1993 141.7618 25.0 0.0 7.01 Vp
41.2703 141.6878 25.0 0.0 7.35 Vp
41.3413 141.6135 25.0 1.0 7.30 Vp
41.4122 141.5391 25.0 127.6 6.91 Vp
41.4831 141.4645 25.0 401.6 6.92 Vp
41.5539 141.3898 25.0 400.6 7.12 Vp
41.6247 141.3149 25.0 3.6 6.84 Vp
41.6954 141.2398 25.0 0.0 6.56 Vp
41.7661 141.1646 25.0 132.5 6.61 Vp
41.8367 141.0892 25.0 501.3 6.42 Vp
41.9073 141.0136 25.0 210.9 6.41 Vp
41.9779 140.9379 25.0 35.9 6.58 Vp
42.0483 140.8620 25.0 11.2 6.98 Vp
42.1188 140.7859 25.0 3.7 6.86 Vp
42.1891 140.7097 25.0 0.6 6.99 Vp
42.2595 140.6333 25.0 0.0 7.08 Vp
42.3298 140.5567 25.0 0.0 7.09 Vp
42.4000 140.4800 25.0 0.0 6.87 Vp
42.4701 140.4031 25.0 0.0 6.72 Vp
42.5402 140.3260 25.0 0.0 6.73 Vp
41.1838 141.9302 25.0 0.0 6.70 Vp
41.2550 141.8563 25.0 0.0 6.92 Vp
41.3260 141.7823 25.0 0.0 7.25 Vp
41.3970 141.7081 25.0 2.6 6.91 Vp
41.4680 141.6337 25.0 488.8 6.77 Vp
41.5390 141.5592 25.0 842.9 6.86 Vp
41.6099 141.4845 25.0 283.7 6.97 Vp
41.6807 141.4096 25.0 2.4 6.91 Vp
41.7515 141.3346 25.0 34.8 6.88 Vp
41.8222 141.2594 25.0 467.0 7.00 Vp
41.8929 141.1840 25.0 838.5 6.81 Vp
41.9636 141.1085 25.0 1013.6 6.65 Vp
42.0342 141.0328 25.0 262.5 6.99 Vp
42.1047 140.9569 25.0 18.9 6.89 Vp
42.1752 140.8809 25.0 4.3 6.81 Vp
42.2457 140.8047 25.0 0.3 6.91 Vp
42.3160 140.7283 25.0 0.0 6.91 Vp
42.3864 140.6518 25.0 0.0 6.87 Vp
42.4567 140.5751 25.0 0.0 7.03 Vp
42.5269 140.4982 25.0 0.0 6.91 Vp
42.5971 140.4212 25.0 0.0 6.84 Vp
41.2393 142.0248 25.0 0.0 6.70 Vp
41.3105 141.9510 25.0 0.0 6.70 Vp
41.3816 141.8770 25.0 0.0 6.86 Vp
41.4527 141.8028 25.0 1.7 6.74 Vp
41.5238 141.7285 25.0 1038.8 6.88 Vp
41.5948 141.6540 25.0 990.2 6.85 Vp
41.6657 141.5793 25.0 44.7 6.84 Vp
41.7366 141.5045 25.0 3.0 6.83 Vp
41.8075 141.4295 25.0 33.2 6.74 Vp
41.8783 141.3544 25.0 1975.5 6.93 Vp
41.9490 141.2790 25.0 3174.7 7.06 Vp
42.0198 141.2036 25.0 3001.6 7.02 Vp
42.0904 141.1279 25.0 138.5 6.99 Vp
42.1610 141.0520 25.0 3.1 6.71 Vp
42.2316 140.9761 25.0 3.1 6.70 Vp
42.3021 140.8999 25.0 1.6 6.85 Vp
42.3726 140.8236 25.0 0.0 6.92 Vp
42.4430 140.7470 25.0 0.0 7.13 Vp
42.5133 140.6704 25.0 0.0 7.04 Vp
42.5836 140.5935 25.0 0.0 6.93 Vp
42.6538 140.5165 25.0 0.0 6.74 Vp
41.2947 142.1196 25.0 0.0 6.70 Vp
41.3660 142.0458 25.0 0.0 6.70 Vp
41.4372 141.9719 25.0 0.0 6.70 Vp
41.5083 141.8977 25.0 1.3 6.86 Vp
41.5794 141.8235 25.0 241.5 6.79 Vp
41.6505 141.7490 25.0 194.4 6.77 Vp
41.7215 141.6744 25.0 5.1 6.70 Vp
41.7925 141.5996 25.0 0.1 6.70 Vp
41.8634 141.5246 25.0 151.1 6.66 Vp
41.9343 141.4495 25.0 3057.2 6.78 Vp
42.0051 141.3742 25.0 2990.5 6.93 Vp
42.0759 141.2988 25.0 648.2 6.93 Vp
42.1466 141.2231 25.0 23.7 7.00 Vp
42.2173 141.1474 25.0 178.6 7.04 Vp
42.2879 141.0714 25.0 291.1 6.85 Vp
42.3585 140.9953 25.0 117.7 6.86 Vp
42.4290 140.9189 25.0 22.6 7.09 Vp
42.4994 140.8425 25.0 0.0 6.90 Vp
42.5699 140.7658 25.0 0.0 6.86 Vp
42.6402 140.6890 25.0 0.0 6.76 Vp
42.7105 140.6121 25.0 0.0 6.69 Vp
41.3500 142.2146 25.0 0.0 6.70 Vp
41.4213 142.1408 25.0 0.0 6.70 Vp
41.4926 142.0669 25.0 0.0 6.70 Vp
41.5638 141.9928 25.0 0.0 6.74 Vp
41.6350 141.9186 25.0 0.0 6.70 Vp
41.7061 141.8441 25.0 0.0 6.70 Vp
41.7772 141.7696 25.0 0.2 6.70 Vp
41.8482 141.6948 25.0 0.1 6.70 Vp
41.9192 141.6199 25.0 32.6 6.66 Vp
41.9902 141.5448 25.0 625.7 6.73 Vp
42.0610 141.4696 25.0 529.7 6.91 Vp
42.1319 141.3941 25.0 104.1 6.73 Vp
42.2027 141.3186 25.0 44.7 6.80 Vp
42.2734 141.2428 25.0 481.4 7.07 Vp
42.3441 141.1669 25.0 843.1 7.06 Vp
42.4147 141.0908 25.0 719.1 6.97 Vp
42.4853 141.0145 25.0 348.8 6.95 Vp
42.5559 140.9381 25.0 4.3 6.80 Vp
42.6263 140.8615 25.0 0.0 6.78 Vp
42.6968 140.7847 25.0 0.0 6.71 Vp
42.7671 140.7078 25.0 0.0 6.74 Vp
41.4053 142.3097 25.0 0.0 6.70 Vp
41.4767 142.2360 25.0 0.0 6.70 Vp
41.5480 142.1621 25.0 0.0 6.70 Vp
41.6193 142.0881 25.0 0.0 6.70 Vp
41.6905 142.0139 25.0 0.0 6.70 Vp
41.7617 141.9395 25.0 0.0 6.70 Vp
41.8328 141.8649 25.0 0.0 6.70 Vp
41.9039 141.7902 25.0 0.1 6.75 Vp
41.9750 141.7154 25.0 16.6 6.70 Vp
42.0460 141.6403 25.0 148.4 6.74 Vp
42.1169 141.5651 25.0 61.5 6.91 Vp
42.1878 141.4897 25.0 60.2 6.70 Vp
42.2587 141.4142 25.0 104.6 6.81 Vp
42.3295 141.3385 25.0 1216.5 7.03 Vp
42.4002 141.2626 25.0 1259.1 7.04 Vp
42.4709 141.1865 25.0 866.3 6.99 Vp
42.5416 141.1103 25.0 490.5 6.84 Vp
42.6122 141.0339 25.0 222.5 6.87 Vp
42.6827 140.9573 25.0 114.1 6.86 Vp
42.7532 140.8806 25.0 14.6 6.78 Vp
42.8237 140.8037 25.0 0.0 6.79 Vp
41.4605 142.4050 25.0 0.0 6.70 Vp
41.5319 142.3313 25.0 0.0 6.70 Vp
41.6033 142.2575 25.0 0.0 6.70 Vp
41.6746 142.1835 25.0 0.0 6.70 Vp
41.7459 142.1093 25.0 0.0 6.70 Vp
41.8172 142.0350 25.0 0.0 6.70 Vp
41.8884 141.9605 25.0 0.0 6.70 Vp
41.9595 141.8858 25.0 0.4 6.76 Vp
42.0307 141.8110 25.0 45.0 6.74 Vp
42.1017 141.7360 25.0 71.9 6.76 Vp
42.1727 141.6608 25.0 24.2 6.71 Vp
42.2437 141.5854 25.0 56.0 6.74 Vp
42.3146 141.5099 25.0 161.4 6.71 Vp
42.3855 141.4343 25.0 1759.8 6.98 Vp
42.4563 141.3584 25.0 2517.5 7.04 Vp
42.5271 141.2824 25.0 1272.3 7.04 Vp
42.5978 141.2062 25.0 387.2 6.77 Vp
42.6684 141.1299 25.0 303.1 6.77 Vp
42.7391 141.0533 25.0 327.0 6.87 Vp
42.8096 140.9766 25.0 75.4 6.82 Vp
42.8801 140.8997 25.0 0.0 7.04 Vp
41.5156 142.5004 25.0 0.0 6.70 Vp
41.5871 142.4268 25.0 0.0 6.70 Vp
41.6585 142.3530 25.0 0.0 6.70 Vp
41.7299 142.2791 25.0 0.0 6.70 Vp
41.8013 142.2049 25.0 0.0 6.70 Vp
41.8726 142.1306 25.0 0.0 6.70 Vp
41.9439 142.0562 25.0 0.0 6.70 Vp
42.0151 141.9816 25.0 1.3 6.74 Vp
42.0863 141.9068 25.0 58.9 6.76 Vp
42.1574 141.8318 25.0 31.3 6.71 Vp
42.2285 141.7567 25.0 21.4 6.74 Vp
42.2995 141.6814 25.0 77.5 6.66 Vp
42.3705 141.6059 25.0 305.9 6.66 Vp
42.4414 141.5302 25.0 714.9 6.84 Vp
42.5123 141.4545 25.0 635.3 7.07 Vp
42.5831 141.3784 25.0 1113.0 7.10 Vp
42.6539 141.3023 25.0 765.3 6.89 Vp
42.7246 141.2260 25.0 242.0 6.69 Vp
42.7953 141.1495 25.0 118.7 6.80 Vp
42.8659 141.0728 25.0 26.8 7.01 Vp
42.9365 140.9960 25.0 0.0 6.74 Vp
41.5706 142.5960 25.0 0.0 6.70 Vp
41.6421 142.5225 25.0 0.0 6.70 Vp
41.7136 142.4487 25.0 0.0 6.70 Vp
41.7851 142.3748 25.0 0.0 6.70 Vp
41.8565 142.3007 25.0 0.0 6.70 Vp
41.9279 142.2265 25.0 0.0 6.70 Vp
41.9993 142.1521 25.0 4.0 6.68 Vp
42.0705 142.0775 25.0 26.7 6.63 Vp
42.1418 142.0027 25.0 67.2 6.63 Vp
42.2130 141.9278 25.0 48.9 6.72 Vp
42.2841 141.8527 25.0 32.5 6.53 Vp
42.3552 141.7775 25.0 110.1 6.65 Vp
42.4263 141.7020 25.0 364.6 6.74 Vp
42.4973 141.6264 25.0 619.5 6.76 Vp
42.5682 141.5506 25.0 423.0 7.09 Vp
42.6391 141.4747 25.0 611.5 6.73 Vp
42.7099 141.3986 25.0 458.1 6.81 Vp
42.7807 141.3223 25.0 317.7 6.68 Vp
42.8515 141.2458 25.0 51.1 6.73 Vp
42.9221 141.1692 25.0 4.7 6.57 Vp
42.9928 141.0924 25.0 0.0 6.70 Vp
41.6255 142.6918 25.0 0.0 6.70 Vp
41.6971 142.6183 25.0 0.0 6.70 Vp
41.7687 142.5446 25.0 0.0 6.70 Vp
41.8403 142.4707 25.0 0.0 6.70 Vp
41.9117 142.3967 25.0 0.0 6.70 Vp
41.9832 142.3225 25.0 0.2 6.63 Vp
42.0546 142.2481 25.0 34.6 6.58 Vp
42.1259 142.1736 25.0 133.9 6.44 Vp
42.1972 142.0988 25.0 100.3 6.32 Vp
42.2685 142.0240 25.0 73.8 6.20 Vp
42.3397 141.9489 25.0 95.1 6.36 Vp
42.4109 141.8737 25.0 476.8 6.69 Vp
42.4820 141.7983 25.0 521.1 6.72 Vp
42.5530 141.7227 25.0 486.2 6.63 Vp
42.6240 141.6470 25.0 944.4 6.79 Vp
42.6950 141.5711 25.0 755.0 6.58 Vp
42.7659 141.4950 25.0 700.3 6.74 Vp
42.8368 141.4188 25.0 433.2 6.66 Vp
42.9076 141.3424 25.0 14.0 6.56 Vp
42.9783 141.2658 25.0 0.0 6.50 Vp
43.0490 141.1890 25.0 0.0 6.59 Vp
41.6804 142.7878 25.0 0.0 6.70 Vp
41.7521 142.7143 25.0 0.0 6.70 Vp
41.8237 142.6406 25.0 0.0 6.69 Vp
41.8953 142.5668 25.0 40.8 6.75 Vp
41.9669 142.4928 25.0 90.5 6.44 Vp
42.0384 142.4186 25.0 102.7 6.97 Vp
42.1098 142.3443 25.0 201.9 6.18 Vp
42.1812 142.2698 25.0 687.8 6.19 Vp
42.2526 142.1952 25.0 294.4 6.27 Vp
42.3239 142.1203 25.0 306.9 6.03 Vp
42.3952 142.0453 25.0 274.2 5.89 Vp
42.4664 141.9701 25.0 1169.0 6.15 Vp
42.5376 141.8948 25.0 1104.7 6.90 Vp
42.6087 141.8193 25.0 1443.7 7.00 Vp
42.6798 141.7436 25.0 1126.2 7.07 Vp
42.7508 141.6677 25.0 1199.7 6.93 Vp
42.8218 141.5917 25.0 2091.4 7.10 Vp
42.8927 141.5155 25.0 764.6 6.73 Vp
42.9636 141.4391 25.0 115.2 6.55 Vp
43.0344 141.3625 25.0 0.7 6.59 Vp
43.1051 141.2858 25.0 0.0 6.69 Vp
41.7352 142.8839 25.0 0.0 6.70 Vp
41.8069 142.8104 25.0 0.0 6.70 Vp
41.8786 142.7368 25.0 1.8 6.64 Vp
41.9503 142.6630 25.0 56.2 6.32 Vp
42.0219 142.5891 25.0 127.8 6.09 Vp
42.0935 142.5150 25.0 950.7 6.87 Vp
42.1650 142.4407 25.0 825.6 5.96 Vp
42.2365 142.3663 25.0 1051.5 6.24 Vp
42.3079 142.2916 25.0 750.9 6.62 Vp
42.3793 142.2168 25.0 661.7 5.96 Vp
42.4506 142.1419 25.0 389.6 5.95 Vp
42.5219 142.0667 25.0 1209.2 6.22 Vp
42.5931 141.9914 25.0 1214.8 6.48 Vp
42.6643 141.9160 25.0 1618.8 6.91 Vp
42.7355 141.8403 25.0 1429.1 7.17 Vp
42.8065 141.7645 25.0 643.4 6.48 Vp
42.8776 141.6885 25.0 835.4 6.62 Vp
42.9486 141.6123 25.0 185.6 6.67 Vp
43.0195 141.5360 25.0 82.3 6.83 Vp
43.0904 141.4595 25.0 0.9 6.57 Vp
43.1612 141.3828 25.0 0.0 6.72 Vp
41.7625 142.9320 25.0 0.0 6.67 Vp
41.8343 142.8586 25.0 6.3 6.68 Vp
41.9060 142.7850 25.0 60.1 6.63 Vp
41.9777 142.7112 25.0 87.7 6.29 Vp
42.0494 142.6373 25.0 164.8 5.95 Vp
42.1210 142.5632 25.0 1992.0 6.71 Vp
42.1925 142.4890 25.0 1278.4 6.06 Vp
42.2640 142.4145 25.0 1051.1 6.39 Vp
42.3355 142.3399 25.0 526.5 6.30 Vp
42.4069 142.2652 25.0 356.9 5.97 Vp
42.4783 142.1902 25.0 414.9 6.08 Vp
42.5496 142.1151 25.0 408.5 5.81 Vp
42.6209 142.0398 25.0 381.1 6.10 Vp
42.6921 141.9644 25.0 572.0 5.88 Vp
42.7633 141.8887 25.0 527.1 7.08 Vp
42.8344 141.8129 25.0 639.6 7.09 Vp
42.9054 141.7370 25.0 341.1 6.50 Vp
42.9765 141.6608 25.0 70.8 5.96 Vp
43.0474 141.5845 25.0 14.2 6.59 Vp
43.1183 141.5080 25.0 0.6 6.54 Vp
43.1892 141.4313 25.0 0.0 6.59 Vp
41.7899 142.9801 25.0 0.0 6.66 Vp
41.8617 142.9068 25.0 65.6 6.70 Vp
41.9334 142.8332 25.0 321.4 6.55 Vp
42.0052 142.7594 25.0 192.3 6.35 Vp
42.0768 142.6856 25.0 365.1 5.86 Vp
42.1485 142.6115 25.0 1931.1 6.05 Vp
42.2201 142.5372 25.0 1893.9 6.65 Vp
42.2916 142.4628 25.0 2371.0 7.10 Vp
42.3631 142.3883 25.0 856.0 6.38 Vp
42.4345 142.3135 25.0 691.0 6.42 Vp
42.5059 142.2386 25.0 792.5 6.10 Vp
42.5773 142.1635 25.0 290.8 5.63 Vp
42.6486 142.0883 25.0 834.1 6.74 Vp
42.7198 142.0128 25.0 548.0 5.62 Vp
42.7910 141.9372 25.0 300.9 6.37 Vp
42.8622 141.8614 25.0 1004.6 7.58 Vp
42.9333 141.7855 25.0 320.7 6.94 Vp
43.0043 141.7094 25.0 49.4 6.37 Vp
43.0753 141.6330 25.0 4.2 6.56 Vp
43.1463 141.5566 25.0 0.4 6.54 Vp
43.2171 141.4799 25.0 0.0 6.61 Vp
41.8172 143.0283 25.0 0.0 6.65 Vp
41.8890 142.9550 25.0 101.0 6.56 Vp
41.9608 142.8814 25.0 626.2 6.71 Vp
42.0326 142.8077 25.0 482.4 6.61 Vp
42.1043 142.7339 25.0 879.6 6.11 Vp
42.1760 142.6598 25.0 1529.6 6.11 Vp
42.2476 142.5856 25.0 2235.0 7.02 Vp
42.3192 142.5112 25.0 2434.7 6.56 Vp
42.3907 142.4367 25.0 2173.2 7.05 Vp
42.4622 142.3619 25.0 832.2 6.26 Vp
42.5336 142.2870 25.0 595.1 6.10 Vp
42.6050 142.2120 25.0 265.9 5.69 Vp
42.6763 142.1367 25.0 471.5 6.34 Vp
42.7476 142.0613 25.0 364.5 6.03 Vp
42.8188 141.9857 25.0 253.7 6.12 Vp
42.8900 141.9100 25.0 816.1 7.09 Vp
42.9611 141.8340 25.0 440.4 7.00 Vp
43.0322 141.7579 25.0 161.4 6.99 Vp
43.1032 141.6816 25.0 2.1 6.78 Vp
43.1742 141.6052 25.0 0.3 6.59 Vp
43.2451 141.5286 25.0 0.0 6.55 Vp
41.8445 143.0766 25.0 0.0 6.58 Vp
41.9164 143.0032 25.0 150.6 6.63 Vp
41.9882 142.9297 25.0 787.0 6.57 Vp
42.0600 142.8560 25.0 921.0 6.66 Vp
42.1317 142.7822 25.0 2410.1 6.41 Vp
42.2034 142.7082 25.0 2068.9 6.40 Vp
42.2751 142.6340 25.0 4686.7 8.12 Vp
42.3467 142.5596 25.0 4378.1 7.03 Vp
42.4182 142.4851 25.0 4039.4 6.82 Vp
42.4897 142.4104 25.0 2103.0 5.87 Vp
42.5612 142.3355 25.0 562.7 5.69 Vp
42.6326 142.2605 25.0 287.0 5.73 Vp
42.7040 142.1852 25.0 821.5 6.38 Vp
42.7753 142.1098 25.0 629.6 6.40 Vp
42.8466 142.0343 25.0 142.2 5.75 Vp
42.9178 141.9585 25.0 417.6 6.46 Vp
42.9889 141.8826 25.0 657.9 6.99 Vp
43.0600 141.8066 25.0 562.5 6.99 Vp
43.1311 141.7303 25.0 34.9 7.07 Vp
43.2021 141.6539 25.0 0.2 6.56 Vp
43.2730 141.5773 25.0 0.0 6.57 Vp
41.8718 143.1249 25.0 0.0 6.55 Vp
41.9437 143.0515 25.0 33.4 6.39 Vp
42.0155 142.9781 25.0 719.1 6.48 Vp
42.0874 142.9044 25.0 826.3 5.90 Vp
42.1591 142.8306 25.0 2351.6 6.22 Vp
42.2309 142.7566 25.0 2040.0 6.44 Vp
42.3025 142.6824 25.0 4281.6 7.26 Vp
42.3742 142.6081 25.0 3250.9 5.98 Vp
42.4458 142.5336 25.0 3265.8 6.48 Vp
42.5173 142.4589 25.0 2399.2 6.24 Vp
42.5888 142.3840 25.0 1978.2 6.36 Vp
42.6602 142.3090 25.0 1849.3 6.93 Vp
42.7316 142.2338 25.0 2245.4 6.87 Vp
42.8030 142.1584 25.0 896.0 6.36 Vp
42.8743 142.0829 25.0 594.3 6.09 Vp
42.9455 142.0072 25.0 685.1 6.56 Vp
43.0167 141.9313 25.0 681.2 6.54 Vp
43.0878 141.8552 25.0 501.8 6.65 Vp
43.1589 141.7790 25.0 113.4 7.06 Vp
43.2300 141.7026 25.0 0.1 6.61 Vp
43.3009 141.6260 25.0 0.0 6.54 Vp
41.8990 143.1732 25.0 0.0 6.57 Vp
41.9710 143.0999 25.0 30.6 6.42 Vp
42.0429 143.0264 25.0 361.5 6.36 Vp
42.1147 142.9528 25.0 614.2 6.08 Vp
42.1865 142.8790 25.0 1772.1 6.62 Vp
42.2583 142.8050 25.0 2583.7 6.59 Vp
42.3300 142.7309 25.0 2436.0 6.22 Vp
42.4017 142.6566 25.0 1400.5 6.07 Vp
42.4733 142.5821 25.0 2231.7 6.71 Vp
42.5448 142.5074 25.0 3295.7 6.71 Vp
42.6164 142.4326 25.0 2911.6 6.34 Vp
42.6879 142.3576 25.0 1512.3 6.13 Vp
42.7593 142.2824 25.0 1447.1 6.30 Vp
42.8307 142.2070 25.0 872.3 6.45 Vp
42.9020 142.1315 25.0 771.2 6.48 Vp
42.9733 142.0558 25.0 335.1 6.04 Vp
43.0445 141.9800 25.0 592.3 6.46 Vp
43.1156 141.9039 25.0 697.7 6.95 Vp
43.1868 141.8277 25.0 259.1 7.43 Vp
43.2578 141.7513 25.0 0.0 6.57 Vp
43.3288 141.6748 25.0 0.0 6.56 Vp
41.9263 143.2216 25.0 0.0 6.50 Vp
41.9982 143.1483 25.0 32.2 6.47 Vp
42.0702 143.0748 25.0 641.6 6.39 Vp
42.1420 143.0012 25.0 827.8 6.11 Vp
42.2139 142.9274 25.0 1768.2 6.78 Vp
42.2857 142.8535 25.0 3902.9 6.81 Vp
42.3574 142.7794 25.0 2750.6 6.56 Vp
42.4291 142.7051 25.0 1799.2 6.34 Vp
42.5008 142.6306 25.0 1243.6 5.96 Vp
42.5724 142.5560 25.0 1430.7 6.10 Vp
42.6439 142.4812 25.0 2230.7 6.54 Vp
42.7154 142.4062 25.0 1925.5 6.77 Vp
42.7869 142.3311 25.0 758.6 6.32 Vp
42.8583 142.2557 25.0 367.7 6.43 Vp
42.9297 142.1802 25.0 173.0 6.10 Vp
43.0010 142.1046 25.0 254.2 6.21 Vp
43.0722 142.0287 25.0 141.6 5.89 Vp
43.1434 141.9527 25.0 207.9 6.43 Vp
43.2146 141.8765 25.0 217.9 7.04 Vp
43.2857 141.8001 25.0 0.0 6.55 Vp
43.3567 141.7236 25.0 0.0 6.45 Vp
41.9535 143.2700 25.0 0.0 6.61 Vp
42.0255 143.1967 25.0 29.0 6.38 Vp
42.0974 143.1233 25.0 513.5 6.20 Vp
42.1694 143.0497 25.0 1637.2 6.31 Vp
42.2412 142.9760 25.0 3063.3 6.86 Vp
42.3130 142.9020 25.0 3260.9 6.58 Vp
42.3848 142.8279 25.0 2404.4 6.54 Vp
42.4566 142.7537 25.0 3002.2 7.00 Vp
42.5282 142.6792 25.0 1166.7 6.11 Vp
42.5999 142.6046 25.0 1019.7 6.38 Vp
42.6715 142.5298 25.0 1046.6 6.43 Vp
42.7430 142.4549 25.0 2323.6 7.13 Vp
42.8145 142.3797 25.0 1114.3 6.16 Vp
42.8859 142.3044 25.0 282.1 6.14 Vp
42.9573 142.2290 25.0 179.5 5.99 Vp
43.0287 142.1533 25.0 287.7 6.02 Vp
43.0999 142.0775 25.0 429.6 6.13 Vp
43.1712 142.0015 25.0 181.7 6.34 Vp
43.2424 141.9253 25.0 167.4 7.04 Vp
43.3135 141.8490 25.0 0.0 6.50 Vp
43.3846 141.7724 25.0 0.0 6.50 Vp
41.9807 143.3184 25.0 0.0 6.57 Vp
42.0527 143.2452 25.0 45.0 6.46 Vp
42.1247 143.1718 25.0 579.8 6.51 Vp
42.1967 143.0982 25.0 651.2 6.09 Vp
42.2686 143.0245 25.0 1278.5 6.43 Vp
42.3404 142.9506 25.0 1704.8 6.31 Vp
42.4122 142.8765 25.0 1500.7 5.99 Vp
42.4840 142.8023 25.0 2200.5 6.62 Vp
42.5557 142.7279 25.0 1297.0 6.44 Vp
42.6274 142.6533 25.0 1469.4 6.14 Vp
42.6990 142.5785 25.0 1016.3 6.34 Vp
42.7705 142.5036 25.0 1189.5 6.13 Vp
42.8421 142.4285 25.0 1044.9 6.68 Vp
42.9135 142.3532 25.0 412.4 6.76 Vp
42.9850 142.2777 25.0 115.9 6.22 Vp
43.0563 142.2021 25.0 137.6 6.04 Vp
43.1276 142.1263 25.0 163.6 5.93 Vp
43.1989 142.0503 25.0 154.1 6.07 Vp
43.2701 141.9742 25.0 40.1 6.68 Vp
43.3413 141.8979 25.0 0.0 6.48 Vp
43.4124 141.8214 25.0 0.0 6.39 Vp
42.0079 143.3669 25.0 0.0 6.63 Vp
42.0799 143.2937 25.0 33.9 6.70 Vp
42.1520 143.2203 25.0 238.8 6.33 Vp
42.2239 143.1468 25.0 407.1 6.49 Vp
42.2959 143.0731 25.0 680.2 5.99 Vp
42.3677 142.9992 25.0 1668.7 6.15 Vp
42.4396 142.9252 25.0 2267.9 6.75 Vp
42.5114 142.8509 25.0 3141.3 7.13 Vp
42.5831 142.7765 25.0 2673.7 7.15 Vp
42.6548 142.7020 25.0 1555.5 6.25 Vp
42.7265 142.6272 25.0 920.6 6.50 Vp
42.7981 142.5523 25.0 888.9 6.46 Vp
42.8696 142.4772 25.0 802.5 6.10 Vp
42.9411 142.4020 25.0 361.3 6.76 Vp
43.0126 142.3266 25.0 82.2 6.21 Vp
43.0840 142.2510 25.0 35.6 5.88 Vp
43.1553 142.1752 25.0 57.7 6.16 Vp
43.2266 142.0992 25.0 24.8 6.01 Vp
43.2979 142.0231 25.0 3.0 6.31 Vp
43.3691 141.9468 25.0 0.0 6.46 Vp
43.4402 141.8703 25.0 0.0 6.33 Vp
42.0350 143.4154 25.0 0.0 6.56 Vp
42.1071 143.3422 25.0 16.8 6.70 Vp
42.1792 143.2689 25.0 99.1 6.57 Vp
42.2512 143.1954 25.0 523.2 6.60 Vp
42.3231 143.1217 25.0 1201.6 6.57 Vp
42.3951 143.0479 25.0 1948.8 7.06 Vp
42.4669 142.9738 25.0 2325.0 7.00 Vp
42.5388 142.8996 25.0 2345.9 7.27 Vp
42.6105 142.8253 25.0 1681.1 6.57 Vp
42.6823 142.7507 25.0 898.3 6.56 Vp
42.7539 142.6760 25.0 507.9 6.19 Vp
42.8256 142.6011 25.0 633.0 7.06 Vp
42.8972 142.5261 25.0 679.4 6.59 Vp
42.9687 142.4508 25.0 468.3 6.78 Vp
43.0402 142.3754 25.0 147.4 6.14 Vp
43.1116 142.2998 25.0 35.6 5.78 Vp
43.1830 142.2241 25.0 182.8 6.06 Vp
43.2543 142.1481 25.0 31.9 6.16 Vp
43.3256 142.0721 25.0 1.8 6.10 Vp
43.3968 141.9958 25.0 0.0 6.38 Vp
43.4680 141.9193 25.0 0.0 6.06 Vp
42.0622 143.4640 25.0 0.0 6.70 Vp
42.1343 143.3908 25.0 1.4 6.70 Vp
42.2064 143.3175 25.0 218.3 6.49 Vp
42.2784 143.2440 25.0 579.4 6.06 Vp
42.3504 143.1704 25.0 1208.9 7.19 Vp
42.4224 143.0965 25.0 5272.4 7.92 Vp
42.4943 143.0226 25.0 6537.1 8.65 Vp
42.5661 142.9484 25.0 4257.1 8.83 Vp
42.6379 142.8740 25.0 2332.5 7.53 Vp
42.7097 142.7995 25.0 864.0 6.83 Vp
42.7814 142.7248 25.0 358.9 6.16 Vp
42.8531 142.6500 25.0 351.3 6.02 Vp
42.9247 142.5749 25.0 1172.9 6.77 Vp
42.9962 142.4997 25.0 752.6 6.79 Vp
43.0678 142.4243 25.0 133.9 6.24 Vp
43.1392 142.3488 25.0 174.5 6.44 Vp
43.2106 142.2730 25.0 220.3 6.31 Vp
43.2820 142.1971 25.0 43.5 6.09 Vp
43.3533 142.1210 25.0 0.8 6.15 Vp
43.4245 142.0448 25.0 0.0 6.51 Vp
43.4958 141.9684 25.0 0.0 6.24 Vp
42.0893 143.5126 25.0 0.0 6.70 Vp
42.1614 143.4395 25.0 1.1 6.70 Vp
42.2336 143.3662 25.0 217.7 6.67 Vp
42.3056 143.2927 25.0 740.4 7.49 Vp
42.3776 143.2191 25.0 2068.5 8.08 Vp
42.4496 143.1453 25.0 6430.9 7.80 Vp
42.5216 143.0713 25.0 4216.3 7.48 Vp
42.5934 142.9972 25.0 3617.7 8.74 Vp
42.6653 142.9228 25.0 3547.9 8.06 Vp
42.7371 142.8484 25.0 3673.5 8.62 Vp
42.8088 142.7737 25.0 1346.9 7.59 Vp
42.8805 142.6988 25.0 576.0 6.79 Vp
42.9522 142.6238 25.0 281.9 6.20 Vp
43.0238 142.5486 25.0 727.2 6.91 Vp
43.0953 142.4733 25.0 339.3 6.50 Vp
43.1668 142.3978 25.0 527.9 6.78 Vp
43.2383 142.3220 25.0 233.3 6.40 Vp
43.3096 142.2462 25.0 53.8 6.34 Vp
43.3810 142.1701 25.0 0.0 6.09 Vp
43.4523 142.0939 25.0 0.0 6.01 Vp
43.5235 142.0174 25.0 0.0 6.09 Vp
42.1164 143.5612 25.0 0.0 6.70 Vp
42.1886 143.4881 25.0 1.4 6.70 Vp
42.2607 143.4149 25.0 27.8 6.66 Vp
42.3328 143.3414 25.0 737.3 6.81 Vp
42.4049 143.2679 25.0 1613.0 7.36 Vp
42.4769 143.1941 25.0 1954.9 6.17 Vp
42.5488 143.1201 25.0 1556.0 6.64 Vp
42.6208 143.0460 25.0 1894.7 7.72 Vp
42.6926 142.9717 25.0 1913.9 7.78 Vp
42.7645 142.8972 25.0 3337.0 7.54 Vp
42.8362 142.8226 25.0 4760.1 7.71 Vp
42.9080 142.7478 25.0 1153.1 7.17 Vp
42.9796 142.6728 25.0 77.2 5.77 Vp
43.0513 142.5976 25.0 630.4 6.70 Vp
43.1228 142.5223 25.0 674.4 6.59 Vp
43.1944 142.4468 25.0 299.0 6.56 Vp
43.2658 142.3711 25.0 216.1 6.44 Vp
43.3373 142.2952 25.0 206.2 6.82 Vp
43.4086 142.2192 25.0 20.6 6.03 Vp
43.4800 142.1430 25.0 0.0 6.17 Vp
43.5512 142.0666 25.0 0.0 6.13 Vp
42.1435 143.6100 25.0 0.0 6.70 Vp
42.2157 143.5369 25.0 0.1 6.70 Vp
42.2878 143.4636 25.0 4.8 6.71 Vp
42.3600 143.3902 25.0 114.6 6.72 Vp
42.4321 143.3167 25.0 831.5 7.43 Vp
42.5041 143.2429 25.0 1683.9 6.79 Vp
42.5761 143.1690 25.0 2660.7 7.67 Vp
42.6481 143.0948 25.0 1422.0 7.67 Vp
42.7200 143.0206 25.0 1004.8 7.12 Vp
42.7918 142.9462 25.0 601.1 7.26 Vp
42.8636 142.8715 25.0 2562.8 7.42 Vp
42.9354 142.7967 25.0 3247.0 8.41 Vp
43.0071 142.7218 25.0 1004.3 6.91 Vp
43.0787 142.6466 25.0 482.3 6.23 Vp
43.1504 142.5713 25.0 438.9 6.64 Vp
43.2219 142.4958 25.0 227.5 6.75 Vp
43.2934 142.4202 25.0 323.3 6.70 Vp
43.3649 142.3443 25.0 284.1 6.57 Vp
43.4363 142.2683 25.0 70.2 6.84 Vp
43.5076 142.1921 25.0 0.0 6.32 Vp
43.5789 142.1158 25.0 0.0 6.24 Vp
42.1705 143.6587 25.0 0.0 6.70 Vp
42.2428 143.5856 25.0 0.0 6.70 Vp
42.3150 143.5124 25.0 0.5 6.72 Vp
42.3871 143.4390 25.0 13.7 6.83 Vp
42.4592 143.3655 25.0 179.6 7.12 Vp
42.5313 143.2917 25.0 768.4 6.80 Vp
42.6033 143.2178 25.0 1986.9 7.19 Vp
42.6753 143.1438 25.0 3075.1 8.33 Vp
42.7473 143.0695 25.0 957.8 6.39 Vp
42.8191 142.9951 25.0 1544.4 7.13 Vp
42.8910 142.9205 25.0 1992.8 6.81 Vp
42.9628 142.8457 25.0 2495.2 7.14 Vp
43.0345 142.7708 25.0 961.3 6.64 Vp
43.1062 142.6957 25.0 699.0 6.21 Vp
43.1778 142.6204 25.0 241.9 6.32 Vp
43.2494 142.5449 25.0 207.9 6.54 Vp
43.3210 142.4693 25.0 269.0 6.46 Vp
43.3925 142.3935 25.0 71.6 6.66 Vp
43.4639 142.3175 25.0 10.7 6.36 Vp
43.5353 142.2413 25.0 0.0 6.33 Vp
43.6066 142.1650 25.0 0.0 6.20 Vp
42.1975 143.7075 25.0 0.0 6.70 Vp
42.2698 143.6344 25.0 0.0 6.70 Vp
42.3421 143.5612 25.0 0.0 6.70 Vp
42.4143 143.4879 25.0 15.6 6.71 Vp
42.4864 143.4144 25.0 92.4 6.40 Vp
42.5585 143.3407 25.0 543.9 6.82 Vp
42.6306 143.2668 25.0 2472.8 7.39 Vp
42.7026 143.1927 25.0 4100.4 8.61 Vp
42.7745 143.1185 25.0 860.0 6.43 Vp
42.8465 143.0441 25.0 826.2 6.18 Vp
42.9183 142.9695 25.0 870.0 6.38 Vp
42.9902 142.8948 25.0 879.9 6.58 Vp
43.0619 142.8199 25.0 515.6 6.98 Vp
43.1336 142.7448 25.0 554.4 6.33 Vp
43.2053 142.6695 25.0 120.9 6.04 Vp
43.2769 142.5941 25.0 117.7 6.37 Vp
43.3485 142.5185 25.0 218.4 6.46 Vp
43.4200 142.4427 25.0 102.8 6.66 Vp
43.4915 142.3667 25.0 80.3 6.79 Vp
43.5629 142.2906 25.0 0.0 6.62 Vp
43.6343 142.2142 25.0 0.0 6.39 Vp
42.2246 143.7563 25.0 0.0 6.70 Vp
42.2969 143.6833 25.0 0.0 6.70 Vp
42.3691 143.6101 25.0 0.0 6.70 Vp
42.4414 143.5368 25.0 18.9 6.72 Vp
42.5135 143.4633 25.0 65.8 6.22 Vp
42.5857 143.3896 25.0 623.9 6.79 Vp
42.6578 143.3158 25.0 1626.9 6.28 Vp
42.7298 143.2417 25.0 1410.6 7.07 Vp
42.8018 143.1675 25.0 523.4 6.52 Vp
42.8738 143.0932 25.0 793.2 6.54 Vp
42.9457 143.0186 25.0 426.4 6.43 Vp
43.0175 142.9439 25.0 261.7 6.37 Vp
43.0893 142.8690 25.0 1309.3 7.25 Vp
43.1611 142.7939 25.0 627.7 6.75 Vp
43.2328 142.7187 25.0 111.0 6.02 Vp
43.3044 142.6433 25.0 135.9 6.36 Vp
43.3760 142.5677 25.0 302.0 6.60 Vp
43.4476 142.4919 25.0 154.1 6.55 Vp
43.5191 142.4160 25.0 120.2 6.79 Vp
43.5905 142.3398 25.0 0.0 6.53 Vp
43.6619 142.2635 25.0 0.0 6.35 Vp
42.2516 143.8051 25.0 0.0 6.70 Vp
42.3239 143.7321 25.0 0.0 6.70 Vp
42.3962 143.6590 25.0 0.0 6.70 Vp
42.4684 143.5857 25.0 8.8 6.70 Vp
42.5407 143.5122 25.0 42.4 6.28 Vp
42.6128 143.4386 25.0 1175.2 7.29 Vp
42.6849 143.3648 25.0 3753.8 8.15 Vp
42.7570 143.2908 25.0 861.5 6.95 Vp
42.8290 143.2166 25.0 715.9 7.11 Vp
42.9010 143.1422 25.0 681.6 6.69 Vp
42.9730 143.0677 25.0 773.5 6.98 Vp
43.0448 142.9930 25.0 492.9 6.36 Vp
43.1167 142.9182 25.0 1264.1 5.90 Vp
43.1885 142.8431 25.0 1116.1 6.65 Vp
43.2602 142.7679 25.0 76.0 5.90 Vp
43.3319 142.6925 25.0 263.5 6.61 Vp
43.4035 142.6169 25.0 675.8 7.26 Vp
43.4751 142.5412 25.0 142.2 6.79 Vp
43.5466 142.4653 25.0 7.4 6.68 Vp
43.6181 142.3892 25.0 0.0 6.68 Vp
43.6895 142.3129 25.0 0.0 6.59 Vp
42.2785 143.8540 25.0 0.0 6.70 Vp
42.3509 143.7811 25.0 0.0 6.70 Vp
42.4232 143.7080 25.0 0.0 6.70 Vp
42.4955 143.6347 25.0 2.0 6.70 Vp
42.5677 143.5612 25.0 27.2 6.07 Vp
42.6399 143.4876 25.0 405.9 6.31 Vp
42.7121 143.4138 25.0 1978.1 7.36 Vp
42.7842 143.3398 25.0 997.9 7.26 Vp
42.8563 143.2657 25.0 661.7 6.73 Vp
42.9283 143.1914 25.0 501.1 6.73 Vp
43.0002 143.1169 25.0 728.0 6.59 Vp
43.0722 143.0422 25.0 1173.8 6.51 Vp
43.1440 142.9674 25.0 521.7 5.74 Vp
43.2158 142.8923 25.0 862.8 6.43 Vp
43.2876 142.8172 25.0 49.6 6.01 Vp
43.3593 142.7418 25.0 154.4 6.27 Vp
43.4310 142.6662 25.0 260.3 6.72 Vp
43.5026 142.5905 25.0 103.7 6.69 Vp
43.5742 142.5146 25.0 3.2 6.70 Vp
43.6457 142.4386 25.0 0.0 6.67 Vp
43.7171 142.3623 25.0 0.0 6.57 Vp
42.3055 143.9030 25.0 0.0 6.70 Vp
42.3779 143.8300 25.0 0.0 6.70 Vp
42.4502 143.7570 25.0 0.0 6.70 Vp
42.5225 143.6837 25.0 2.2 6.70 Vp
42.5948 143.6103 25.0 27.5 6.47 Vp
42.6671 143.5367 25.0 219.2 6.43 Vp
42.7392 143.4629 25.0 1798.2 6.72 Vp
42.8114 143.3890 25.0 1752.2 7.21 Vp
42.8835 143.3148 25.0 548.7 6.86 Vp
42.9555 143.2406 25.0 389.4 6.99 Vp
43.0275 143.1661 25.0 321.6 6.66 Vp
43.0994 143.0914 25.0 1376.4 6.74 Vp
43.1713 143.0166 25.0 1837.1 6.80 Vp
43.2432 142.9416 25.0 261.7 6.47 Vp
43.3150 142.8665 25.0 35.7 6.08 Vp
43.3867 142.7911 25.0 17.3 6.33 Vp
43.4584 142.7156 25.0 21.4 6.63 Vp
43.5301 142.6399 25.0 21.9 6.68 Vp
43.6017 142.5640 25.0 1.3 6.70 Vp
43.6732 142.4880 25.0 0.0 6.70 Vp
43.7447 142.4117 25.0 0.0 6.70 Vp
42.3324 143.9519 25.0 0.0 6.70 Vp
42.4048 143.8791 25.0 0.0 6.70 Vp
42.4772 143.8060 25.0 0.0 6.70 Vp
42.5496 143.7328 25.0 0.8 6.70 Vp
42.6219 143.6594 25.0 24.4 6.59 Vp
42.6941 143.5858 25.0 281.5 6.48 Vp
42.7663 143.5121 25.0 1951.4 6.11 Vp
42.8385 143.4381 25.0 2042.4 6.90 Vp
42.9106 143.3640 25.0 676.3 7.01 Vp
42.9827 143.2898 25.0 366.6 6.68 Vp
43.0547 143.2153 25.0 364.2 6.76 Vp
43.1267 143.1407 25.0 1083.9 6.69 Vp
43.1986 143.0659 25.0 1340.9 6.61 Vp
43.2705 142.9910 25.0 353.3 6.66 Vp
43.3424 142.9158 25.0 199.7 6.13 Vp
43.4141 142.8405 25.0 23.3 5.72 Vp
43.4859 142.7650 25.0 10.5 6.70 Vp
43.5575 142.6893 25.0 2.7 6.70 Vp
43.6292 142.6135 25.0 1.9 6.70 Vp
43.7007 142.5374 25.0 0.0 6.70 Vp
43.7722 142.4612 25.0 0.0 6.70 Vp
42.3593 144.0009 25.0 0.0 6.70 Vp
42.4318 143.9281 25.0 0.0 6.70 Vp
42.5042 143.8551 25.0 0.0 6.70 Vp
42.5766 143.7819 25.0 0.9 6.70 Vp
42.6489 143.7085 25.0 13.4 6.68 Vp
42.7212 143.6350 25.0 345.2 6.50 Vp
42.7934 143.5612 25.0 1266.2 6.12 Vp
42.8656 143.4874 25.0 1451.3 6.90 Vp
42.9378 143.4133 25.0 1386.4 7.30 Vp
43.0099 143.3390 25.0 393.8 6.37 Vp
43.0820 143.2646 25.0 541.2 6.99 Vp
43.1540 143.1900 25.0 513.3 6.79 Vp
43.2259 143.1153 25.0 1134.0 6.92 Vp
43.2978 143.0403 25.0 467.7 6.90 Vp
43.3697 142.9652 25.0 258.1 6.48 Vp
43.4415 142.8899 25.0 25.6 6.70 Vp
43.5133 142.8144 25.0 11.2 6.70 Vp
43.5850 142.7388 25.0 6.2 6.70 Vp
43.6566 142.6629 25.0 1.2 6.68 Vp
43.7282 142.5869 25.0 0.0 6.68 Vp
43.7998 142.5108 25.0 0.0 6.68 Vp
42.3862 144.0500 25.0 0.0 6.70 Vp
42.4587 143.9772 25.0 0.0 6.70 Vp
42.5311 143.9042 25.0 0.0 6.70 Vp
42.6035 143.8310 25.0 0.7 6.70 Vp
42.6759 143.7577 25.0 28.7 7.13 Vp
42.7482 143.6841 25.0 1100.8 7.12 Vp
42.8205 143.6105 25.0 3942.9 7.89 Vp
42.8927 143.5366 25.0 2362.6 6.80 Vp
42.9649 143.4626 25.0 1856.7 6.96 Vp
43.0371 143.3883 25.0 695.3 6.52 Vp
43.1091 143.3139 25.0 1683.7 7.05 Vp
43.1812 143.2394 25.0 467.9 6.32 Vp
43.2532 143.1646 25.0 1427.9 7.12 Vp
43.3251 143.0897 25.0 387.6 6.50 Vp
43.3970 143.0146 25.0 172.5 6.50 Vp
43.4688 142.9394 25.0 20.9 6.46 Vp
43.5406 142.8639 25.0 14.1 6.50 Vp
43.6124 142.7883 25.0 13.6 6.68 Vp
43.6841 142.7125 25.0 0.4 6.68 Vp
43.7557 142.6365 25.0 0.0 6.68 Vp
43.8273 142.5603 25.0 0.0 6.68 Vp
42.4399 144.1483 25.0 0.0 6.70 Vp
42.5124 144.0755 25.0 0.0 6.70 Vp
42.5850 144.0025 25.0 0.0 6.70 Vp
42.6574 143.9294 25.0 0.0 6.70 Vp
42.7299 143.8561 25.0 89.5 7.32 Vp
42.8022 143.7827 25.0 1350.2 6.66 Vp
42.8746 143.7090 25.0 4587.5 6.71 Vp
42.9469 143.6352 25.0 3883.9 6.72 Vp
43.0191 143.5612 25.0 2714.1 6.89 Vp
43.0913 143.4871 25.0 3056.7 6.89 Vp
43.1635 143.4127 25.0 1659.8 7.28 Vp
43.2356 143.3382 25.0 576.8 6.60 Vp
43.3076 143.2635 25.0 1275.8 6.95 Vp
43.3796 143.1887 25.0 671.6 6.31 Vp
43.4516 143.1136 25.0 176.6 6.51 Vp
43.5235 143.0384 25.0 12.9 6.19 Vp
43.5953 142.9630 25.0 4.5 6.19 Vp
43.6671 142.8874 25.0 52.4 6.21 Vp
43.7389 142.8117 25.0 28.0 6.46 Vp
43.8106 142.7357 25.0 0.0 6.68 Vp
43.8822 142.6596 25.0 0.0 6.68 Vp
42.4935 144.2467 25.0 0.0 6.68 Vp
42.5661 144.1740 25.0 0.0 6.68 Vp
42.6387 144.1011 25.0 0.0 6.68 Vp
42.7112 144.0280 25.0 0.0 6.68 Vp
42.7837 143.9548 25.0 33.3 6.73 Vp
42.8562 143.8813 25.0 811.8 6.43 Vp
42.9286 143.8078 25.0 2749.6 6.46 Vp
43.0009 143.7340 25.0 1346.9 6.32 Vp
43.0732 143.6601 25.0 2099.3 6.11 Vp
43.1455 143.5860 25.0 7127.1 6.89 Vp
43.2177 143.5117 25.0 2263.5 6.31 Vp
43.2899 143.4372 25.0 758.6 6.27 Vp
43.3620 143.3626 25.0 696.9 6.50 Vp
43.4340 143.2878 25.0 277.8 6.81 Vp
43.5061 143.2128 25.0 77.4 6.53 Vp
43.5780 143.1376 25.0 145.9 6.40 Vp
43.6499 143.0623 25.0 163.7 6.26 Vp
43.7218 142.9867 25.0 116.1 6.26 Vp
43.7936 142.9110 25.0 41.6 6.20 Vp
43.8654 142.8352 25.0 0.0 6.68 Vp
43.9371 142.7591 25.0 0.0 6.68 Vp
42.5470 144.3452 25.0 0.0 6.68 Vp
42.6197 144.2726 25.0 0.0 6.68 Vp
42.6924 144.1998 25.0 0.0 6.68 Vp
42.7649 144.1267 25.0 0.0 6.68 Vp
42.8375 144.0536 25.0 0.0 6.68 Vp
42.9100 143.9802 25.0 337.9 6.73 Vp
42.9825 143.9067 25.0 1217.0 6.63 Vp
43.0549 143.8330 25.0 839.1 6.54 Vp
43.1273 143.7591 25.0 646.9 6.24 Vp
43.1996 143.6850 25.0 2106.3 6.85 Vp
43.2718 143.6108 25.0 1441.8 7.26 Vp
43.3441 143.5364 25.0 343.9 6.68 Vp
43.4162 143.4618 25.0 545.8 6.93 Vp
43.4884 143.3871 25.0 378.9 6.60 Vp
43.5605 143.3121 25.0 60.7 5.98 Vp
43.6325 143.2370 25.0 125.5 6.81 Vp
43.7045 143.1617 25.0 337.0 6.75 Vp
43.7764 143.0862 25.0 90.9 6.64 Vp
43.8483 143.0106 25.0 19.8 6.68 Vp
43.9201 142.9347 25.0 0.0 6.68 Vp
43.9918 142.8587 25.0 0.0 6.68 Vp
42.6005 144.4440 25.0 0.0 6.68 Vp
42.6732 144.3714 25.0 0.0 6.68 Vp
42.7459 144.2986 25.0 0.0 6.68 Vp
42.8186 144.2256 25.0 0.0 6.68 Vp
42.8912 144.1525 25.0 0.0 6.68 Vp
42.9638 144.0792 25.0 65.1 6.56 Vp
43.0363 144.0057 25.0 504.2 6.59 Vp
43.1087 143.9321 25.0 829.3 6.65 Vp
43.1812 143.8583 25.0 1019.0 6.58 Vp
43.2536 143.7843 25.0 1156.6 6.39 Vp
43.3259 143.7101 25.0 894.1 6.61 Vp
43.3982 143.6358 25.0 372.7 6.56 Vp
43.4704 143.5612 25.0 230.5 6.82 Vp
43.5426 143.4865 25.0 284.4 6.97 Vp
43.6148 143.4116 25.0 29.2 6.23 Vp
43.6869 143.3366 25.0 7.7 6.68 Vp
43.7589 143.2613 25.0 42.2 6.47 Vp
43.8309 143.1859 25.0 25.5 6.68 Vp
43.9028 143.1103 25.0 8.9 6.68 Vp
43.9747 143.0345 25.0 0.0 6.68 Vp
44.0465 142.9586 25.0 0.0 6.68 Vp
42.6538 144.5429 25.0 0.0 6.68 Vp
42.7266 144.4703 25.0 0.0 6.68 Vp
42.7994 144.3976 25.0 0.0 6.68 Vp
42.8721 144.3247 25.0 0.0 6.68 Vp
42.9448 144.2516 25.0 0.0 6.68 Vp
43.0174 144.1784 25.0 0.0 6.68 Vp
43.0900 144.1050 25.0 0.0 6.68 Vp
43.1625 144.0314 25.0 3.8 6.68 Vp
43.2350 143.9576 25.0 16.5 6.68 Vp
43.3075 143.8837 25.0 5.5 6.68 Vp
43.3799 143.8096 25.0 42.5 6.71 Vp
43.4522 143.7353 25.0 142.3 6.61 Vp
43.5245 143.6608 25.0 43.6 6.59 Vp
43.5968 143.5861 25.0 117.1 6.96 Vp
43.6690 143.5113 25.0 32.8 6.73 Vp
43.7411 143.4363 25.0 0.0 6.68 Vp
43.8132 143.3611 25.0 0.0 6.68 Vp
43.8853 143.2857 25.0 0.0 6.68 Vp
43.9573 143.2102 25.0 0.0 6.68 Vp
44.0292 143.1345 25.0 0.0 6.68 Vp
44.1011 143.0585 25.0 0.0 6.68 Vp
41.0158 141.6468 30.0 0.0 6.98 Vp
41.0867 141.5728 30.0 0.0 7.13 Vp
41.1577 141.4986 30.0 0.0 7.25 Vp
41.2286 141.4242 30.0 0.0 7.48 Vp
41.2994 141.3496 30.0 1.1 7.45 Vp
41.3702 141.2749 30.0 0.5 7.37 Vp
41.4409 141.2001 30.0 0.0 7.23 Vp
41.5117 141.1250 30.0 0.0 7.07 Vp
41.5823 141.0498 30.0 0.0 7.06 Vp
41.6529 140.9745 30.0 0.0 6.79 Vp
41.7235 140.8989 30.0 0.0 6.83 Vp
41.7940 140.8232 30.0 0.0 6.75 Vp
41.8644 140.7474 30.0 0.0 6.80 Vp
41.9348 140.6713 30.0 0.0 6.81 Vp
42.0052 140.5951 30.0 0.0 6.75 Vp
42.0755 140.5188 30.0 0.0 6.98 Vp
42.1458 140.4422 30.0 0.0 6.98 Vp
42.2160 140.3656 30.0 0.0 6.99 Vp
42.2861 140.2887 30.0 0.0 7.09 Vp
42.3562 140.2117 30.0 0.0 7.36 Vp
42.4262 140.1344 30.0 0.0 7.18 Vp
41.0715 141.7410 30.0 0.0 6.98 Vp
41.1425 141.6670 30.0 0.0 7.20 Vp
41.2135 141.5928 30.0 0.0 7.45 Vp
41.2845 141.5185 30.0 0.0 7.56 Vp
41.3554 141.4440 30.0 108.0 7.46 Vp
41.4263 141.3693 30.0 303.0 7.31 Vp
41.4971 141.2945 30.0 71.0 7.38 Vp
41.5678 141.2195 30.0 0.2 7.18 Vp
41.6386 141.1443 30.0 0.0 7.03 Vp
41.7092 141.0690 30.0 5.5 6.83 Vp
41.7799 140.9935 30.0 4.7 6.74 Vp
41.8504 140.9178 30.0 1.3 6.79 Vp
41.9209 140.8420 30.0 0.2 6.73 Vp
41.9914 140.7660 30.0 0.2 6.73 Vp
42.0618 140.6898 30.0 0.0 6.91 Vp
42.1322 140.6135 30.0 0.0 7.21 Vp
42.2025 140.5370 30.0 0.0 7.25 Vp
42.2728 140.4603 30.0 0.0 7.26 Vp
42.3430 140.3835 30.0 0.0 7.39 Vp
42.4132 140.3065 30.0 0.0 7.25 Vp
42.4833 140.2293 30.0 0.0 6.89 Vp
41.1272 141.8354 30.0 0.0 6.98 Vp
41.1983 141.7614 30.0 0.0 7.20 Vp
41.2693 141.6873 30.0 0.0 7.53 Vp
41.3403 141.6130 30.0 0.0 7.45 Vp
41.4113 141.5385 30.0 71.7 7.25 Vp
41.4822 141.4639 30.0 192.3 7.10 Vp
41.5531 141.3891 30.0 313.6 7.38 Vp
41.6240 141.3141 30.0 30.4 7.18 Vp
41.6947 141.2390 30.0 2.6 6.84 Vp
41.7655 141.1637 30.0 193.5 6.86 Vp
41.8362 141.0882 30.0 339.7 6.68 Vp
41.9068 141.0126 30.0 125.7 6.72 Vp
41.9774 140.9368 30.0 16.0 6.81 Vp
42.0479 140.8609 30.0 2.6 7.12 Vp
42.1184 140.7847 30.0 1.6 7.38 Vp
42.1888 140.7084 30.0 0.5 7.49 Vp
42.2592 140.6320 30.0 0.0 7.48 Vp
42.3296 140.5553 30.0 0.0 7.53 Vp
42.3998 140.4785 30.0 0.0 7.19 Vp
42.4701 140.4016 30.0 0.0 6.99 Vp
42.5402 140.3244 30.0 0.0 6.92 Vp
41.1828 141.9299 30.0 0.0 6.98 Vp
41.2539 141.8560 30.0 0.0 7.21 Vp
41.3250 141.7819 30.0 0.0 7.45 Vp
41.3961 141.7076 30.0 4.7 7.32 Vp
41.4672 141.6332 30.0 140.6 7.02 Vp
41.5382 141.5586 30.0 350.9 6.98 Vp
41.6091 141.4838 30.0 486.0 7.28 Vp
41.6800 141.4089 30.0 69.8 7.26 Vp
41.7508 141.3338 30.0 121.1 7.44 Vp
41.8216 141.2586 30.0 403.0 7.32 Vp
41.8924 141.1831 30.0 621.9 7.00 Vp
41.9631 141.1075 30.0 556.7 6.84 Vp
42.0337 141.0318 30.0 296.2 7.13 Vp
42.1044 140.9559 30.0 5.6 7.18 Vp
42.1749 140.8798 30.0 2.0 7.29 Vp
42.2454 140.8035 30.0 0.4 7.35 Vp
42.3158 140.7271 30.0 0.0 7.34 Vp
42.3862 140.6505 30.0 0.0 7.20 Vp
42.4566 140.5737 30.0 0.0 7.31 Vp
42.5269 140.4968 30.0 0.0 7.09 Vp
42.5971 140.4197 30.0 0.0 7.06 Vp
41.2383 142.0246 30.0 0.0 6.98 Vp
41.3095 141.9507 30.0 0.0 7.20 Vp
41.3807 141.8766 30.0 0.0 7.31 Vp
41.4518 141.8024 30.0 1.9 7.10 Vp
41.5229 141.7280 30.0 352.0 6.94 Vp
41.5940 141.6535 30.0 644.3 7.04 Vp
41.6650 141.5788 30.0 129.1 7.27 Vp
41.7360 141.5039 30.0 20.5 7.43 Vp
41.8069 141.4288 30.0 146.2 7.18 Vp
41.8777 141.3536 30.0 601.1 7.24 Vp
41.9486 141.2782 30.0 998.5 7.23 Vp
42.0193 141.2027 30.0 1903.0 7.13 Vp
42.0900 141.1269 30.0 251.4 7.23 Vp
42.1607 141.0510 30.0 8.5 7.05 Vp
42.2313 140.9750 30.0 1.2 6.99 Vp
42.3019 140.8988 30.0 0.0 7.07 Vp
42.3724 140.8224 30.0 0.0 7.21 Vp
42.4429 140.7458 30.0 0.0 7.28 Vp
42.5133 140.6691 30.0 0.0 7.25 Vp
42.5836 140.5922 30.0 0.0 7.16 Vp
42.6539 140.5151 30.0 0.0 7.06 Vp
41.2937 142.1194 30.0 0.0 6.98 Vp
41.3650 142.0456 30.0 0.0 7.04 Vp
41.4363 141.9716 30.0 0.0 7.06 Vp
41.5075 141.8974 30.0 4.9 6.95 Vp
41.5786 141.8230 30.0 957.2 6.98 Vp
41.6498 141.7486 30.0 1041.4 7.16 Vp
41.7208 141.6739 30.0 88.0 7.24 Vp
41.7919 141.5990 30.0 19.9 7.21 Vp
41.8628 141.5240 30.0 877.3 6.99 Vp
41.9338 141.4488 30.0 2720.2 7.05 Vp
42.0046 141.3735 30.0 2164.9 7.13 Vp
42.0755 141.2980 30.0 1616.3 7.14 Vp
42.1463 141.2223 30.0 155.8 7.33 Vp
42.2170 141.1464 30.0 320.3 7.12 Vp
42.2877 141.0704 30.0 212.9 6.95 Vp
42.3583 140.9942 30.0 86.9 7.12 Vp
42.4289 140.9178 30.0 16.8 7.26 Vp
42.4994 140.8413 30.0 0.0 7.12 Vp
42.5699 140.7646 30.0 0.0 7.09 Vp
42.6403 140.6877 30.0 0.0 7.07 Vp
42.7106 140.6107 30.0 0.0 7.05 Vp
41.3491 142.2145 30.0 0.0 6.98 Vp
41.4204 142.1407 30.0 0.0 6.98 Vp
41.4918 142.0667 30.0 0.0 6.98 Vp
41.5630 141.9925 30.0 8.1 6.93 Vp
41.6343 141.9182 30.0 486.1 7.08 Vp
41.7054 141.8438 30.0 477.7 7.23 Vp
41.7766 141.7691 30.0 51.8 7.22 Vp
41.8477 141.6943 30.0 51.7 7.00 Vp
41.9187 141.6193 30.0 1434.6 6.96 Vp
41.9897 141.5442 30.0 3093.5 7.06 Vp
42.0606 141.4689 30.0 1335.6 7.19 Vp
42.1315 141.3934 30.0 176.4 7.12 Vp
42.2024 141.3178 30.0 169.9 7.14 Vp
42.2732 141.2419 30.0 563.4 7.09 Vp
42.3439 141.1660 30.0 526.1 7.02 Vp
42.4146 141.0898 30.0 531.1 7.13 Vp
42.4853 141.0135 30.0 277.0 7.09 Vp
42.5558 140.9370 30.0 2.8 7.11 Vp
42.6264 140.8603 30.0 0.2 7.10 Vp
42.6969 140.7835 30.0 0.0 7.06 Vp
42.7673 140.7065 30.0 0.0 7.08 Vp
41.4044 142.3097 30.0 0.0 6.98 Vp
41.4758 142.2359 30.0 0.0 6.98 Vp
41.5472 142.1620 30.0 0.0 6.98 Vp
41.6185 142.0879 30.0 3.4 6.96 Vp
41.6898 142.0136 30.0 63.9 7.07 Vp
41.7611 141.9392 30.0 69.0 7.27 Vp
41.8323 141.8646 30.0 16.2 7.05 Vp
41.9034 141.7898 30.0 76.5 7.07 Vp
41.9745 141.7149 30.0 584.3 6.98 Vp
42.0456 141.6398 30.0 1012.8 7.13 Vp
42.1166 141.5645 30.0 336.2 7.31 Vp
42.1875 141.4890 30.0 104.6 7.12 Vp
42.2584 141.4135 30.0 442.4 7.03 Vp
42.3293 141.3377 30.0 852.3 7.12 Vp
42.4001 141.2617 30.0 332.6 7.03 Vp
42.4709 141.1856 30.0 646.2 7.10 Vp
42.5416 141.1093 30.0 437.6 7.10 Vp
42.6122 141.0329 30.0 190.6 7.18 Vp
42.6828 140.9562 30.0 95.9 7.18 Vp
42.7534 140.8794 30.0 9.4 7.11 Vp
42.8239 140.8025 30.0 0.0 7.08 Vp
41.4596 142.4050 30.0 0.0 6.98 Vp
41.5311 142.3313 30.0 0.0 6.98 Vp
41.6025 142.2574 30.0 0.0 6.98 Vp
41.6739 142.1833 30.0 0.0 6.98 Vp
41.7453 142.1091 30.0 0.5 6.98 Vp
41.8166 142.0347 30.0 4.8 7.03 Vp
41.8879 141.9602 30.0 8.4 7.05 Vp
41.9591 141.8855 30.0 43.7 7.10 Vp
42.0302 141.8106 30.0 225.0 6.98 Vp
42.1014 141.7355 30.0 296.6 7.04 Vp
42.1724 141.6603 30.0 97.6 7.10 Vp
42.2435 141.5849 30.0 118.4 6.95 Vp
42.3144 141.5093 30.0 906.2 6.93 Vp
42.3854 141.4336 30.0 2096.2 7.17 Vp
42.4562 141.3577 30.0 1165.7 7.12 Vp
42.5270 141.2816 30.0 885.6 7.11 Vp
42.5978 141.2053 30.0 254.9 6.88 Vp
42.6685 141.1289 30.0 273.8 7.07 Vp
42.7392 141.0523 30.0 257.4 7.19 Vp
42.8098 140.9755 30.0 54.8 7.11 Vp
42.8804 140.8986 30.0 0.0 7.15 Vp
41.5147 142.5005 30.0 0.0 6.98 Vp
41.5863 142.4269 30.0 0.0 6.98 Vp
41.6578 142.3530 30.0 0.0 6.98 Vp
41.7293 142.2790 30.0 0.0 6.98 Vp
41.8007 142.2048 30.0 0.0 7.00 Vp
41.8720 142.1305 30.0 0.1 7.01 Vp
41.9434 142.0560 30.0 8.0 7.17 Vp
42.0147 141.9813 30.0 29.1 7.10 Vp
42.0859 141.9064 30.0 196.9 6.94 Vp
42.1571 141.8314 30.0 106.8 6.92 Vp
42.2282 141.7562 30.0 70.0 6.90 Vp
42.2993 141.6809 30.0 234.2 6.85 Vp
42.3703 141.6053 30.0 752.8 6.94 Vp
42.4413 141.5296 30.0 1477.9 7.12 Vp
42.5123 141.4538 30.0 1272.7 7.19 Vp
42.5831 141.3777 30.0 1270.4 7.41 Vp
42.6540 141.3015 30.0 285.5 7.03 Vp
42.7248 141.2251 30.0 113.4 6.92 Vp
42.7955 141.1485 30.0 107.3 7.13 Vp
42.8661 141.0718 30.0 18.5 7.16 Vp
42.9368 140.9949 30.0 0.0 7.05 Vp
41.5698 142.5962 30.0 0.0 6.98 Vp
41.6414 142.5226 30.0 0.0 6.98 Vp
41.7130 142.4488 30.0 0.0 7.00 Vp
41.7845 142.3748 30.0 0.0 6.99 Vp
41.8560 142.3007 30.0 0.0 7.04 Vp
41.9274 142.2264 30.0 1.1 7.34 Vp
41.9988 142.1519 30.0 38.8 7.25 Vp
42.0702 142.0773 30.0 94.5 7.08 Vp
42.1415 142.0025 30.0 197.5 6.91 Vp
42.2127 141.9275 30.0 130.4 6.90 Vp
42.2839 141.8523 30.0 245.1 7.01 Vp
42.3551 141.7770 30.0 531.7 6.96 Vp
42.4262 141.7015 30.0 789.5 7.09 Vp
42.4972 141.6259 30.0 437.4 7.07 Vp
42.5682 141.5500 30.0 697.0 7.46 Vp
42.6392 141.4740 30.0 834.4 7.10 Vp
42.7101 141.3979 30.0 548.7 7.14 Vp
42.7809 141.3215 30.0 217.5 6.92 Vp
42.8517 141.2450 30.0 47.2 6.96 Vp
42.9224 141.1683 30.0 9.5 6.93 Vp
42.9931 141.0914 30.0 0.0 7.02 Vp
41.6248 142.6921 30.0 0.0 6.98 Vp
41.6965 142.6185 30.0 0.0 6.98 Vp
41.7681 142.5447 30.0 0.0 7.00 Vp
41.8397 142.4708 30.0 7.0 7.04 Vp
41.9112 142.3967 30.0 18.5 7.38 Vp
41.9827 142.3225 30.0 52.2 7.28 Vp
42.0542 142.2480 30.0 155.3 7.29 Vp
42.1256 142.1734 30.0 222.2 7.03 Vp
42.1969 142.0987 30.0 274.5 6.88 Vp
42.2683 142.0237 30.0 319.8 6.83 Vp
42.3395 141.9486 30.0 494.0 6.96 Vp
42.4107 141.8733 30.0 828.3 7.15 Vp
42.4819 141.7979 30.0 748.7 7.03 Vp
42.5530 141.7223 30.0 956.1 6.94 Vp
42.6241 141.6465 30.0 936.4 7.09 Vp
42.6951 141.5705 30.0 285.8 7.03 Vp
42.7661 141.4944 30.0 685.6 7.19 Vp
42.8370 141.4181 30.0 350.5 6.98 Vp
42.9078 141.3416 30.0 14.8 6.92 Vp
42.9786 141.2649 30.0 0.0 6.78 Vp
43.0494 141.1881 30.0 0.0 6.92 Vp
41.6797 142.7881 30.0 0.0 6.98 Vp
41.7514 142.7146 30.0 0.0 7.01 Vp
41.8231 142.6409 30.0 2.2 7.05 Vp
41.8948 142.5670 30.0 71.6 7.02 Vp
41.9664 142.4929 30.0 198.0 6.79 Vp
42.0379 142.4187 30.0 1152.6 8.25 Vp
42.1095 142.3443 30.0 611.0 6.97 Vp
42.1809 142.2698 30.0 665.0 7.37 Vp
42.2524 142.1951 30.0 820.9 7.07 Vp
42.3237 142.1201 30.0 795.9 6.98 Vp
42.3951 142.0451 30.0 932.6 6.65 Vp
42.4663 141.9698 30.0 1165.9 6.85 Vp
42.5376 141.8944 30.0 1077.5 7.29 Vp
42.6088 141.8188 30.0 1476.3 7.05 Vp
42.6799 141.7431 30.0 975.1 7.17 Vp
42.7510 141.6672 30.0 814.6 7.53 Vp
42.8220 141.5911 30.0 2006.3 8.22 Vp
42.8930 141.5148 30.0 528.0 7.37 Vp
42.9639 141.4384 30.0 74.8 6.74 Vp
43.0347 141.3618 30.0 0.0 6.91 Vp
43.1055 141.2850 30.0 0.0 6.91 Vp
41.7345 142.8843 30.0 0.0 7.01 Vp
41.8063 142.8108 30.0 7.4 7.08 Vp
41.8781 142.7371 30.0 147.2 7.17 Vp
41.9498 142.6633 30.0 184.8 6.58 Vp
42.0215 142.5893 30.0 342.5 6.22 Vp
42.0931 142.5151 30.0 2862.2 6.96 Vp
42.1647 142.4408 30.0 1333.0 6.80 Vp
42.2362 142.3663 30.0 985.4 6.92 Vp
42.3077 142.2916 30.0 1071.8 6.78 Vp
42.3791 142.2167 30.0 1199.0 7.10 Vp
42.4505 142.1417 30.0 1202.2 7.05 Vp
42.5219 142.0665 30.0 1190.8 6.36 Vp
42.5932 141.9911 30.0 1086.6 6.63 Vp
42.6644 141.9156 30.0 2046.9 7.54 Vp
42.7356 141.8399 30.0 1471.8 7.66 Vp
42.8067 141.7640 30.0 648.8 6.79 Vp
42.8778 141.6880 30.0 587.9 6.66 Vp
42.9489 141.6118 30.0 146.4 7.09 Vp
43.0198 141.5353 30.0 54.6 6.91 Vp
43.0908 141.4588 30.0 0.0 6.94 Vp
43.1616 141.3820 30.0 0.0 6.95 Vp
41.7619 142.9324 30.0 0.0 7.02 Vp
41.8337 142.8590 30.0 31.1 7.12 Vp
41.9055 142.7853 30.0 350.0 7.12 Vp
41.9773 142.7115 30.0 333.1 6.47 Vp
42.0490 142.6375 30.0 511.6 6.09 Vp
42.1206 142.5634 30.0 1235.6 6.10 Vp
42.1922 142.4891 30.0 1142.8 6.43 Vp
42.2638 142.4146 30.0 1631.4 6.88 Vp
42.3353 142.3399 30.0 575.9 6.31 Vp
42.4068 142.2651 30.0 633.5 6.61 Vp
42.4782 142.1901 30.0 869.9 7.12 Vp
42.5496 142.1149 30.0 1153.4 6.83 Vp
42.6209 142.0396 30.0 756.2 6.21 Vp
42.6922 141.9641 30.0 708.7 6.58 Vp
42.7634 141.8884 30.0 529.5 7.62 Vp
42.8346 141.8125 30.0 671.2 7.55 Vp
42.9057 141.7365 30.0 221.4 6.97 Vp
42.9768 141.6603 30.0 64.2 6.68 Vp
43.0478 141.5839 30.0 13.1 6.92 Vp
43.1188 141.5073 30.0 0.0 6.88 Vp
43.1897 141.4306 30.0 0.0 6.85 Vp
41.7893 142.9806 30.0 0.0 7.01 Vp
41.8611 142.9072 30.0 28.6 7.14 Vp
41.9329 142.8336 30.0 487.8 7.09 Vp
42.0047 142.7598 30.0 568.2 6.47 Vp
42.0765 142.6858 30.0 962.8 6.46 Vp
42.1482 142.6117 30.0 1347.6 6.55 Vp
42.2198 142.5374 30.0 1612.4 6.31 Vp
42.2914 142.4629 30.0 2199.0 6.87 Vp
42.3629 142.3883 30.0 1525.5 6.99 Vp
42.4344 142.3135 30.0 1094.4 6.94 Vp
42.5059 142.2385 30.0 745.5 6.54 Vp
42.5773 142.1634 30.0 681.7 6.63 Vp
42.6487 142.0880 30.0 877.9 6.79 Vp
42.7200 142.0126 30.0 190.1 6.22 Vp
42.7912 141.9369 30.0 570.1 7.19 Vp
42.8624 141.8611 30.0 1241.3 7.98 Vp
42.9336 141.7850 30.0 269.5 6.97 Vp
43.0047 141.7088 30.0 38.8 6.79 Vp
43.0757 141.6325 30.0 1.9 6.89 Vp
43.1467 141.5560 30.0 0.0 6.87 Vp
43.2177 141.4793 30.0 0.0 6.87 Vp
41.8166 143.0289 30.0 0.0 7.03 Vp
41.8885 142.9554 30.0 71.8 7.05 Vp
41.9604 142.8819 30.0 626.3 7.14 Vp
42.0322 142.8081 30.0 759.9 6.47 Vp
42.1039 142.7342 30.0 1846.9 6.18 Vp
42.1757 142.6601 30.0 2187.3 6.73 Vp
42.2473 142.5858 30.0 3211.9 7.13 Vp
42.3190 142.5114 30.0 1961.0 6.11 Vp
42.3905 142.4367 30.0 3533.9 7.44 Vp
42.4621 142.3620 30.0 1372.3 6.55 Vp
42.5336 142.2870 30.0 548.0 6.52 Vp
42.6050 142.2119 30.0 490.6 6.74 Vp
42.6764 142.1366 30.0 700.2 7.11 Vp
42.7477 142.0611 30.0 238.7 6.83 Vp
42.8190 141.9854 30.0 485.0 7.00 Vp
42.8902 141.9096 30.0 722.9 7.08 Vp
42.9614 141.8336 30.0 323.2 7.08 Vp
43.0326 141.7575 30.0 213.8 7.26 Vp
43.1036 141.6811 30.0 8.2 6.95 Vp
43.1747 141.6046 30.0 0.0 6.73 Vp
43.2456 141.5279 30.0 0.0 6.74 Vp
41.8439 143.0772 30.0 0.0 6.99 Vp
41.9159 143.0038 30.0 28.9 7.11 Vp
41.9877 142.9302 30.0 481.7 6.96 Vp
42.0596 142.8565 30.0 932.5 6.54 Vp
42.1314 142.7825 30.0 2265.1 6.54 Vp
42.2031 142.7085 30.0 2281.5 6.52 Vp
42.2748 142.6342 30.0 5080.6 7.45 Vp
42.3465 142.5598 30.0 2653.0 6.32 Vp
42.4181 142.4852 30.0 2726.8 6.79 Vp
42.4897 142.4104 30.0 1958.3 6.56 Vp
42.5612 142.3355 30.0 891.8 6.48 Vp
42.6327 142.2604 30.0 1375.8 7.02 Vp
42.7041 142.1851 30.0 1716.0 7.15 Vp
42.7755 142.1097 30.0 651.2 7.07 Vp
42.8468 142.0340 30.0 308.3 6.59 Vp
42.9180 141.9582 30.0 550.5 6.87 Vp
42.9893 141.8823 30.0 640.3 7.50 Vp
43.0604 141.8061 30.0 442.4 7.11 Vp
43.1315 141.7298 30.0 55.2 7.11 Vp
43.2026 141.6533 30.0 0.0 6.74 Vp
43.2736 141.5767 30.0 0.0 6.73 Vp
41.8712 143.1255 30.0 0.0 7.00 Vp
41.9432 143.0521 30.0 17.1 6.91 Vp
42.0151 142.9785 30.0 322.8 6.77 Vp
42.0870 142.9048 30.0 701.5 6.46 Vp
42.1588 142.8309 30.0 1719.5 6.74 Vp
42.2306 142.7569 30.0 2172.8 6.59 Vp
42.3023 142.6827 30.0 3047.3 6.40 Vp
42.3740 142.6083 30.0 1147.5 5.89 Vp
42.4457 142.5337 30.0 1730.4 7.07 Vp
42.5173 142.4590 30.0 1810.6 6.56 Vp
42.5888 142.3840 30.0 992.4 6.16 Vp
42.6603 142.3090 30.0 2219.6 7.32 Vp
42.7318 142.2337 30.0 1760.7 6.58 Vp
42.8032 142.1583 30.0 738.4 7.13 Vp
42.8745 142.0827 30.0 669.2 6.80 Vp
42.9458 142.0069 30.0 737.0 6.48 Vp
43.0171 141.9310 30.0 1036.9 7.41 Vp
43.0883 141.8548 30.0 370.9 7.13 Vp
43.1594 141.7785 30.0 59.1 7.22 Vp
43.2305 141.7021 30.0 0.0 6.63 Vp
43.3015 141.6254 30.0 0.0 6.70 Vp
41.8985 143.1738 30.0 0.0 6.98 Vp
41.9705 143.1005 30.0 11.3 6.87 Vp
42.0424 143.0270 30.0 154.9 6.73 Vp
42.1144 142.9533 30.0 878.6 6.93 Vp
42.1862 142.8794 30.0 2132.1 7.20 Vp
42.2580 142.8054 30.0 2030.3 6.30 Vp
42.3298 142.7312 30.0 1141.1 5.76 Vp
42.4015 142.6568 30.0 763.8 6.25 Vp
42.4732 142.5823 30.0 2699.3 7.18 Vp
42.5448 142.5075 30.0 3102.5 7.21 Vp
42.6164 142.4326 30.0 1563.7 6.39 Vp
42.6880 142.3576 30.0 1141.2 6.53 Vp
42.7594 142.2824 30.0 781.6 6.21 Vp
42.8309 142.2069 30.0 774.6 7.10 Vp
42.9022 142.1314 30.0 673.9 6.86 Vp
42.9736 142.0556 30.0 307.1 6.10 Vp
43.0449 141.9797 30.0 409.9 6.85 Vp
43.1161 141.9036 30.0 363.6 7.26 Vp
43.1873 141.8273 30.0 186.1 7.36 Vp
43.2584 141.7509 30.0 0.0 6.62 Vp
43.3294 141.6742 30.0 0.0 6.76 Vp
41.9258 143.2222 30.0 0.0 6.98 Vp
41.9978 143.1489 30.0 12.7 6.90 Vp
42.0698 143.0754 30.0 386.2 6.85 Vp
42.1417 143.0017 30.0 1538.8 6.58 Vp
42.2136 142.9279 30.0 2722.8 7.09 Vp
42.2855 142.8539 30.0 3424.2 7.24 Vp
42.3573 142.7797 30.0 1667.7 6.21 Vp
42.4290 142.7054 30.0 903.0 5.92 Vp
42.5007 142.6309 30.0 1552.4 6.28 Vp
42.5724 142.5562 30.0 2035.4 6.76 Vp
42.6440 142.4813 30.0 2325.4 7.13 Vp
42.7156 142.4062 30.0 1512.6 6.86 Vp
42.7871 142.3311 30.0 806.6 6.86 Vp
42.8585 142.2557 30.0 410.4 6.70 Vp
42.9300 142.1801 30.0 196.3 6.28 Vp
43.0013 142.1044 30.0 166.4 6.39 Vp
43.0726 142.0285 30.0 81.8 6.24 Vp
43.1439 141.9524 30.0 164.8 6.82 Vp
43.2151 141.8761 30.0 110.0 7.17 Vp
43.2862 141.7997 30.0 0.0 6.66 Vp
43.3573 141.7231 30.0 0.0 6.60 Vp
41.9530 143.2707 30.0 0.0 6.98 Vp
42.0251 143.1974 30.0 14.2 6.77 Vp
42.0971 143.1239 30.0 277.1 6.62 Vp
42.1690 143.0503 30.0 1156.4 6.86 Vp
42.2410 142.9764 30.0 2538.4 6.83 Vp
42.3129 142.9025 30.0 4338.9 6.71 Vp
42.3847 142.8283 30.0 4198.5 7.17 Vp
42.4565 142.7540 30.0 2138.6 6.55 Vp
42.5282 142.6795 30.0 1133.4 6.21 Vp
42.5999 142.6048 30.0 1280.0 6.70 Vp
42.6716 142.5300 30.0 1211.6 6.42 Vp
42.7431 142.4550 30.0 1149.1 6.91 Vp
42.8147 142.3798 30.0 962.1 6.52 Vp
42.8862 142.3044 30.0 205.1 6.47 Vp
42.9576 142.2289 30.0 166.1 6.18 Vp
43.0290 142.1532 30.0 423.7 6.25 Vp
43.1004 142.0773 30.0 155.4 6.39 Vp
43.1717 142.0012 30.0 109.0 6.70 Vp
43.2429 141.9250 30.0 107.7 7.19 Vp
43.3141 141.8486 30.0 0.0 6.60 Vp
43.3852 141.7720 30.0 0.0 6.70 Vp
41.9802 143.3192 30.0 0.0 6.98 Vp
42.0523 143.2459 30.0 17.8 6.93 Vp
42.1244 143.1724 30.0 469.2 6.80 Vp
42.1964 143.0988 30.0 554.9 6.05 Vp
42.2683 143.0250 30.0 1215.7 6.39 Vp
42.3402 142.9511 30.0 1596.2 6.13 Vp
42.4121 142.8769 30.0 2306.8 6.20 Vp
42.4839 142.8026 30.0 2303.4 6.37 Vp
42.5557 142.7282 30.0 1290.4 6.48 Vp
42.6274 142.6535 30.0 876.0 6.36 Vp
42.6991 142.5787 30.0 778.0 6.33 Vp
42.7707 142.5037 30.0 952.0 6.27 Vp
42.8423 142.4285 30.0 751.8 6.85 Vp
42.9138 142.3532 30.0 553.1 7.40 Vp
42.9853 142.2777 30.0 209.5 6.67 Vp
43.0567 142.2020 30.0 233.9 6.51 Vp
43.1281 142.1261 30.0 202.1 6.37 Vp
43.1994 142.0501 30.0 129.2 6.37 Vp
43.2707 141.9739 30.0 60.9 6.97 Vp
43.3419 141.8975 30.0 0.0 6.75 Vp
43.4131 141.8209 30.0 0.0 6.64 Vp
42.0074 143.3677 30.0 0.0 6.98 Vp
42.0796 143.2944 30.0 29.3 6.98 Vp
42.1516 143.2210 30.0 267.9 6.60 Vp
42.2237 143.1474 30.0 508.2 6.78 Vp
42.2956 143.0737 30.0 1258.0 6.82 Vp
42.3676 142.9997 30.0 1822.4 6.37 Vp
42.4395 142.9256 30.0 1389.6 6.36 Vp
42.5113 142.8513 30.0 1999.7 6.72 Vp
42.5831 142.7769 30.0 1364.6 6.87 Vp
42.6549 142.7023 30.0 533.9 6.47 Vp
42.7266 142.6275 30.0 600.5 6.94 Vp
42.7983 142.5525 30.0 1236.6 7.29 Vp
42.8699 142.4774 30.0 1041.9 6.66 Vp
42.9414 142.4020 30.0 600.8 7.02 Vp
43.0129 142.3266 30.0 105.3 6.52 Vp
43.0844 142.2509 30.0 45.0 6.22 Vp
43.1558 142.1750 30.0 96.6 6.52 Vp
43.2271 142.0990 30.0 37.3 6.33 Vp
43.2985 142.0228 30.0 2.2 6.65 Vp
43.3697 141.9465 30.0 0.0 6.70 Vp
43.4409 141.8699 30.0 0.0 6.68 Vp
42.0346 143.4163 30.0 0.0 6.98 Vp
42.1068 143.3430 30.0 19.8 6.98 Vp
42.1789 143.2696 30.0 124.0 6.82 Vp
42.2509 143.1961 30.0 477.8 7.08 Vp
42.3229 143.1223 30.0 1734.4 7.05 Vp
42.3949 143.0484 30.0 3588.7 6.72 Vp
42.4669 142.9743 30.0 2339.2 7.18 Vp
42.5387 142.9001 30.0 1606.6 7.04 Vp
42.6106 142.8257 30.0 941.8 6.83 Vp
42.6824 142.7511 30.0 429.2 6.60 Vp
42.7541 142.6763 30.0 379.4 6.23 Vp
42.8258 142.6013 30.0 1327.2 7.43 Vp
42.8974 142.5262 30.0 1139.7 6.84 Vp
42.9690 142.4509 30.0 533.7 6.74 Vp
43.0406 142.3755 30.0 157.2 6.43 Vp
43.1120 142.2998 30.0 61.3 6.20 Vp
43.1835 142.2240 30.0 144.0 6.35 Vp
43.2549 142.1480 30.0 29.4 6.36 Vp
43.3262 142.0718 30.0 0.5 6.42 Vp
43.3975 141.9955 30.0 0.0 6.67 Vp
43.4687 141.9190 30.0 0.0 6.51 Vp
42.0618 143.4649 30.0 0.0 6.98 Vp
42.1340 143.3917 30.0 3.0 6.98 Vp
42.2061 143.3183 30.0 27.1 6.71 Vp
42.2782 143.2448 30.0 222.2 6.73 Vp
42.3502 143.1710 30.0 1075.1 7.11 Vp
42.4222 143.0972 30.0 3565.0 7.51 Vp
42.4942 143.0231 30.0 5864.4 8.11 Vp
42.5661 142.9489 30.0 5509.1 8.40 Vp
42.6380 142.8745 30.0 2868.0 8.43 Vp
42.7098 142.7999 30.0 1352.7 7.18 Vp
42.7816 142.7251 30.0 584.6 6.65 Vp
42.8533 142.6502 30.0 580.6 6.37 Vp
42.9250 142.5751 30.0 500.0 6.86 Vp
42.9966 142.4998 30.0 271.1 6.67 Vp
43.0682 142.4244 30.0 272.5 7.01 Vp
43.1397 142.3488 30.0 473.5 6.99 Vp
43.2111 142.2730 30.0 163.8 6.81 Vp
43.2826 142.1970 30.0 28.7 6.51 Vp
43.3539 142.1209 30.0 0.8 6.47 Vp
43.4252 142.0446 30.0 0.0 6.74 Vp
43.4965 141.9680 30.0 0.0 6.65 Vp
42.0889 143.5135 30.0 0.0 6.98 Vp
42.1611 143.4403 30.0 0.4 6.98 Vp
42.2333 143.3670 30.0 60.9 6.92 Vp
42.3054 143.2935 30.0 457.4 6.93 Vp
42.3775 143.2198 30.0 1232.1 7.73 Vp
42.4495 143.1459 30.0 4869.5 8.37 Vp
42.5215 143.0719 30.0 5858.5 8.21 Vp
42.5935 142.9977 30.0 4723.5 8.08 Vp
42.6654 142.9233 30.0 2761.4 7.80 Vp
42.7372 142.8488 30.0 3898.2 8.83 Vp
42.8090 142.7740 30.0 1444.5 7.69 Vp
42.8808 142.6991 30.0 880.7 7.15 Vp
42.9525 142.6241 30.0 278.3 6.64 Vp
43.0241 142.5488 30.0 747.7 7.25 Vp
43.0957 142.4734 30.0 602.6 7.28 Vp
43.1673 142.3978 30.0 441.1 6.89 Vp
43.2388 142.3220 30.0 133.7 6.74 Vp
43.3102 142.2461 30.0 75.3 6.70 Vp
43.3816 142.1700 30.0 1.7 6.41 Vp
43.4530 142.0937 30.0 0.0 6.47 Vp
43.5243 142.0172 30.0 0.0 6.60 Vp
42.1160 143.5622 30.0 0.0 6.98 Vp
42.1883 143.4891 30.0 1.0 6.98 Vp
42.2605 143.4157 30.0 47.4 6.89 Vp
42.3326 143.3422 30.0 1202.7 9.62 Vp
42.4047 143.2686 30.0 1657.4 7.83 Vp
42.4768 143.1947 30.0 4184.0 8.46 Vp
42.5488 143.1207 30.0 2588.1 7.48 Vp
42.6208 143.0466 30.0 2139.0 8.00 Vp
42.6927 142.9722 30.0 1865.3 8.13 Vp
42.7646 142.8977 30.0 2899.7 7.87 Vp
42.8364 142.8230 30.0 2789.4 7.28 Vp
42.9082 142.7481 30.0 747.1 6.97 Vp
42.9800 142.6730 30.0 208.6 6.06 Vp
43.0517 142.5978 30.0 668.5 6.74 Vp
43.1233 142.5224 30.0 497.4 6.95 Vp
43.1949 142.4469 30.0 202.6 6.85 Vp
43.2664 142.3711 30.0 136.4 7.05 Vp
43.3379 142.2952 30.0 224.5 7.22 Vp
43.4093 142.2191 30.0 49.8 7.48 Vp
43.4807 142.1428 30.0 0.0 6.61 Vp
43.5520 142.0663 30.0 0.0 6.63 Vp
42.1431 143.6109 30.0 0.0 6.98 Vp
42.2154 143.5378 30.0 1.1 6.98 Vp
42.2876 143.4645 30.0 8.1 6.98 Vp
42.3598 143.3911 30.0 433.3 7.98 Vp
42.4320 143.3174 30.0 1374.8 8.22 Vp
42.5041 143.2436 30.0 1814.9 7.97 Vp
42.5761 143.1696 30.0 2693.6 8.24 Vp
42.6481 143.0955 30.0 1861.2 8.13 Vp
42.7201 143.0211 30.0 1208.0 7.94 Vp
42.7920 142.9466 30.0 1468.2 8.37 Vp
42.8639 142.8720 30.0 4024.1 8.37 Vp
42.9357 142.7971 30.0 3381.8 8.87 Vp
43.0074 142.7221 30.0 558.7 6.63 Vp
43.0792 142.6469 30.0 221.6 6.24 Vp
43.1508 142.5715 30.0 309.7 6.82 Vp
43.2224 142.4960 30.0 322.6 7.56 Vp
43.2940 142.4202 30.0 219.6 7.15 Vp
43.3655 142.3443 30.0 175.6 6.79 Vp
43.4370 142.2682 30.0 18.7 6.68 Vp
43.5084 142.1920 30.0 0.0 6.74 Vp
43.5797 142.1156 30.0 0.0 6.59 Vp
42.1702 143.6597 30.0 0.0 6.98 Vp
42.2425 143.5866 30.0 0.0 6.98 Vp
42.3148 143.5133 30.0 5.2 6.98 Vp
42.3870 143.4399 30.0 24.1 6.97 Vp
42.4592 143.3663 30.0 339.3 7.71 Vp
42.5313 143.2925 30.0 1260.0 7.62 Vp
42.6034 143.2185 30.0 2909.5 7.90 Vp
42.6754 143.1444 30.0 3524.1 8.30 Vp
42.7474 143.0701 30.0 1105.9 7.24 Vp
42.8193 142.9956 30.0 1535.8 7.46 Vp
42.8912 142.9210 30.0 1949.4 6.97 Vp
42.9631 142.8462 30.0 1599.1 7.82 Vp
43.0349 142.7712 30.0 325.5 6.56 Vp
43.1066 142.6960 30.0 99.3 6.32 Vp
43.1783 142.6206 30.0 176.5 6.50 Vp
43.2500 142.5451 30.0 201.5 6.96 Vp
43.3216 142.4694 30.0 189.2 7.04 Vp
43.3931 142.3935 30.0 90.0 7.27 Vp
43.4646 142.3175 30.0 13.8 6.72 Vp
43.5360 142.2412 30.0 0.0 6.69 Vp
43.6074 142.1648 30.0 0.0 6.54 Vp
42.1973 143.7085 30.0 0.0 6.98 Vp
42.2696 143.6355 30.0 0.0 6.98 Vp
42.3419 143.5622 30.0 0.8 6.98 Vp
42.4141 143.4888 30.0 17.1 7.01 Vp
42.4863 143.4152 30.0 131.1 7.15 Vp
42.5585 143.3414 30.0 959.6 7.84 Vp
42.6306 143.2675 30.0 2871.6 8.40 Vp
42.7027 143.1934 30.0 4061.8 8.43 Vp
42.7747 143.1191 30.0 1021.6 7.24 Vp
42.8467 143.0447 30.0 681.3 6.66 Vp
42.9186 142.9700 30.0 345.1 6.58 Vp
42.9905 142.8952 30.0 359.9 7.04 Vp
43.0623 142.8203 30.0 472.2 7.41 Vp
43.1341 142.7451 30.0 371.5 6.58 Vp
43.2058 142.6698 30.0 133.8 6.57 Vp
43.2775 142.5943 30.0 77.7 6.69 Vp
43.3491 142.5186 30.0 210.6 7.49 Vp
43.4207 142.4428 30.0 116.4 7.38 Vp
43.4922 142.3667 30.0 74.3 7.47 Vp
43.5637 142.2905 30.0 0.0 6.74 Vp
43.6351 142.2141 30.0 0.0 6.68 Vp
42.2243 143.7574 30.0 0.0 6.98 Vp
42.2967 143.6843 30.0 0.0 6.98 Vp
42.3690 143.6111 30.0 0.1 6.98 Vp
42.4413 143.5377 30.0 9.5 7.05 Vp
42.5135 143.4642 30.0 69.0 6.68 Vp
42.5857 143.3904 30.0 816.1 7.23 Vp
42.6578 143.3165 30.0 2146.6 7.08 Vp
42.7299 143.2424 30.0 2237.3 7.63 Vp
42.8020 143.1682 30.0 847.2 7.64 Vp
42.8740 143.0938 30.0 1604.4 7.78 Vp
42.9460 143.0192 30.0 921.1 6.96 Vp
43.0179 142.9444 30.0 348.0 6.61 Vp
43.0897 142.8694 30.0 2027.3 8.08 Vp
43.1615 142.7943 30.0 765.8 6.80 Vp
43.2333 142.7190 30.0 93.9 6.46 Vp
43.3050 142.6435 30.0 113.7 6.98 Vp
43.3767 142.5679 30.0 247.9 7.34 Vp
43.4483 142.4920 30.0 107.8 7.14 Vp
43.5198 142.4160 30.0 95.3 7.35 Vp
43.5913 142.3398 30.0 0.0 6.73 Vp
43.6628 142.2635 30.0 0.0 6.66 Vp
42.2513 143.8063 30.0 0.0 6.98 Vp
42.3237 143.7333 30.0 0.0 6.98 Vp
42.3961 143.6601 30.0 0.2 6.98 Vp
42.4684 143.5867 30.0 3.8 6.98 Vp
42.5406 143.5132 30.0 50.9 6.83 Vp
42.6129 143.4395 30.0 1063.2 7.66 Vp
42.6850 143.3656 30.0 3674.6 8.17 Vp
42.7572 143.2915 30.0 2145.2 8.18 Vp
42.8293 143.2173 30.0 1152.9 8.11 Vp
42.9013 143.1429 30.0 1000.1 7.14 Vp
42.9733 143.0683 30.0 994.3 7.32 Vp
43.0452 142.9936 30.0 231.6 6.40 Vp
43.1171 142.9186 30.0 723.3 6.48 Vp
43.1890 142.8435 30.0 795.5 7.01 Vp
43.2607 142.7682 30.0 80.6 6.33 Vp
43.3325 142.6928 30.0 221.1 7.11 Vp
43.4042 142.6172 30.0 325.7 7.52 Vp
43.4758 142.5414 30.0 46.7 7.18 Vp
43.5474 142.4654 30.0 4.1 6.98 Vp
43.6189 142.3892 30.0 0.0 6.93 Vp
43.6904 142.3129 30.0 0.0 6.88 Vp
42.2783 143.8552 30.0 0.0 6.98 Vp
42.3507 143.7822 30.0 0.0 6.98 Vp
42.4231 143.7091 30.0 0.2 6.98 Vp
42.4954 143.6357 30.0 3.7 6.98 Vp
42.5677 143.5622 30.0 41.6 6.72 Vp
42.6400 143.4885 30.0 760.5 7.27 Vp
42.7122 143.4147 30.0 3726.4 7.81 Vp
42.7844 143.3406 30.0 2781.0 8.23 Vp
42.8565 143.2664 30.0 1442.3 7.76 Vp
42.9286 143.1921 30.0 821.9 7.44 Vp
43.0006 143.1175 30.0 873.8 7.21 Vp
43.0726 143.0428 30.0 774.4 6.71 Vp
43.1445 142.9679 30.0 282.2 6.29 Vp
43.2164 142.8928 30.0 579.7 6.72 Vp
43.2882 142.8176 30.0 48.9 6.26 Vp
43.3599 142.7421 30.0 141.3 6.71 Vp
43.4317 142.6665 30.0 146.0 6.98 Vp
43.5033 142.5907 30.0 87.0 7.00 Vp
43.5750 142.5148 30.0 5.3 6.97 Vp
43.6465 142.4386 30.0 0.0 6.92 Vp
43.7180 142.3623 30.0 0.0 6.87 Vp
42.3053 143.9042 30.0 0.0 6.98 Vp
42.3777 143.8312 30.0 0.0 6.98 Vp
42.4501 143.7581 30.0 0.0 6.98 Vp
42.5225 143.6848 30.0 2.9 6.98 Vp
42.5948 143.6113 30.0 35.5 6.88 Vp
42.6671 143.5376 30.0 573.9 7.30 Vp
42.7394 143.4638 30.0 1500.0 7.00 Vp
42.8116 143.3898 30.0 2646.2 8.07 Vp
42.8837 143.3156 30.0 1582.0 7.68 Vp
42.9558 143.2413 30.0 987.4 7.56 Vp
43.0279 143.1667 30.0 724.0 7.41 Vp
43.0999 143.0920 30.0 2060.1 7.27 Vp
43.1718 143.0172 30.0 1222.9 6.98 Vp
43.2437 142.9421 30.0 194.9 6.63 Vp
43.3156 142.8669 30.0 27.3 6.34 Vp
43.3874 142.7915 30.0 31.3 6.47 Vp
43.4591 142.7159 30.0 26.9 6.77 Vp
43.5308 142.6401 30.0 23.0 6.77 Vp
43.6025 142.5642 30.0 0.4 6.98 Vp
43.6741 142.4881 30.0 0.0 6.98 Vp
43.7456 142.4118 30.0 0.0 6.98 Vp
42.3322 143.9532 30.0 0.0 6.98 Vp
42.4047 143.8803 30.0 0.0 6.98 Vp
42.4771 143.8071 30.0 0.0 6.98 Vp
42.5496 143.7339 30.0 3.3 6.98 Vp
42.6219 143.6604 30.0 53.6 7.07 Vp
42.6942 143.5868 30.0 600.1 7.06 Vp
42.7665 143.5130 30.0 1097.1 6.57 Vp
42.8387 143.4390 30.0 1996.6 7.35 Vp
42.9109 143.3649 30.0 2179.7 7.80 Vp
42.9830 143.2905 30.0 1174.7 7.42 Vp
43.0551 143.2160 30.0 974.8 7.66 Vp
43.1272 143.1414 30.0 1583.9 6.92 Vp
43.1991 143.0665 30.0 785.0 6.69 Vp
43.2711 142.9915 30.0 409.8 6.77 Vp
43.3430 142.9163 30.0 190.7 6.45 Vp
43.4148 142.8409 30.0 16.3 6.65 Vp
43.4866 142.7653 30.0 25.7 6.98 Vp
43.5583 142.6896 30.0 2.1 6.98 Vp
43.6300 142.6137 30.0 0.0 6.98 Vp
43.7016 142.5376 30.0 0.0 6.98 Vp
43.7732 142.4613 30.0 0.0 6.98 Vp
42.3591 144.0023 30.0 0.0 6.98 Vp
42.4317 143.9294 30.0 0.0 6.98 Vp
42.5041 143.8563 30.0 0.0 6.98 Vp
42.5766 143.7830 30.0 2.3 6.98 Vp
42.6490 143.7096 30.0 75.4 7.26 Vp
42.7213 143.6360 30.0 759.8 7.01 Vp
42.7936 143.5622 30.0 1232.9 6.95 Vp
42.8659 143.4883 30.0 1541.5 7.58 Vp
42.9381 143.4141 30.0 2353.9 7.69 Vp
43.0102 143.3398 30.0 1137.2 7.34 Vp
43.0824 143.2654 30.0 940.8 7.57 Vp
43.1544 143.1907 30.0 1250.2 7.12 Vp
43.2264 143.1159 30.0 1118.3 7.30 Vp
43.2984 143.0409 30.0 364.0 7.08 Vp
43.3703 142.9657 30.0 250.0 6.73 Vp
43.4422 142.8904 30.0 21.5 6.88 Vp
43.5140 142.8148 30.0 10.1 6.98 Vp
43.5858 142.7391 30.0 2.9 6.98 Vp
43.6575 142.6632 30.0 0.3 6.98 Vp
43.7291 142.5871 30.0 0.0 6.98 Vp
43.8007 142.5109 30.0 0.0 6.98 Vp
42.3860 144.0514 30.0 0.0 6.98 Vp
42.4586 143.9785 30.0 0.0 6.98 Vp
42.5311 143.9054 30.0 0.0 6.98 Vp
42.6036 143.8322 30.0 0.5 6.98 Vp
42.6760 143.7588 30.0 130.2 7.50 Vp
42.7484 143.6852 30.0 1255.7 7.25 Vp
42.8207 143.6115 30.0 4028.1 7.97 Vp
42.8930 143.5376 30.0 3181.6 7.53 Vp
42.9652 143.4634 30.0 3893.4 8.13 Vp
43.0374 143.3892 30.0 1768.0 6.88 Vp
43.1096 143.3147 30.0 939.8 7.43 Vp
43.1817 143.2401 30.0 970.9 7.35 Vp
43.2537 143.1653 30.0 892.1 7.04 Vp
43.3257 143.0903 30.0 164.1 6.53 Vp
43.3977 143.0152 30.0 138.4 6.76 Vp
43.4696 142.9398 30.0 9.0 6.49 Vp
43.5414 142.8643 30.0 6.6 6.74 Vp
43.6132 142.7887 30.0 7.8 6.98 Vp
43.6849 142.7128 30.0 3.1 6.98 Vp
43.7566 142.6367 30.0 0.0 6.98 Vp
43.8283 142.5605 30.0 0.0 6.98 Vp
42.4398 144.1497 30.0 0.0 6.98 Vp
42.5124 144.0769 30.0 0.0 6.98 Vp
42.5850 144.0039 30.0 0.0 6.98 Vp
42.6575 143.9307 30.0 0.0 6.98 Vp
42.7300 143.8573 30.0 110.4 7.61 Vp
42.8024 143.7838 30.0 1054.8 7.01 Vp
42.8748 143.7101 30.0 3108.8 6.94 Vp
42.9472 143.6362 30.0 3099.6 6.76 Vp
43.0195 143.5622 30.0 4445.4 7.54 Vp
43.0917 143.4880 30.0 5561.1 7.68 Vp
43.1639 143.4136 30.0 2069.0 7.25 Vp
43.2361 143.3390 30.0 1070.6 7.02 Vp
43.3082 143.2643 30.0 1068.9 6.72 Vp
43.3803 143.1893 30.0 331.7 6.59 Vp
43.4523 143.1142 30.0 174.2 6.87 Vp
43.5242 143.0390 30.0 23.1 6.45 Vp
43.5961 142.9635 30.0 32.0 6.44 Vp
43.6680 142.8879 30.0 111.4 6.59 Vp
43.7398 142.8120 30.0 42.2 6.26 Vp
43.8116 142.7361 30.0 0.0 6.98 Vp
43.8833 142.6599 30.0 0.0 6.98 Vp
42.4934 144.2482 30.0 0.0 6.98 Vp
42.5661 144.1754 30.0 0.0 6.98 Vp
42.6388 144.1025 30.0 0.0 6.98 Vp
42.7113 144.0293 30.0 0.0 6.98 Vp
42.7839 143.9560 30.0 1.4 6.98 Vp
42.8564 143.8826 30.0 448.8 7.03 Vp
42.9288 143.8089 30.0 2278.6 6.81 Vp
43.0013 143.7351 30.0 1036.6 6.84 Vp
43.0736 143.6611 30.0 892.9 6.20 Vp
43.1459 143.5870 30.0 3124.5 6.92 Vp
43.2182 143.5126 30.0 1532.2 6.68 Vp
43.2904 143.4381 30.0 816.2 6.91 Vp
43.3626 143.3634 30.0 534.9 6.86 Vp
43.4347 143.2885 30.0 383.5 7.08 Vp
43.5068 143.2135 30.0 232.2 6.78 Vp
43.5788 143.1383 30.0 226.1 6.87 Vp
43.6508 143.0629 30.0 198.6 6.71 Vp
43.7227 142.9873 30.0 43.7 6.55 Vp
43.7946 142.9115 30.0 12.8 6.98 Vp
43.8664 142.8356 30.0 0.0 6.98 Vp
43.9382 142.7594 30.0 0.0 6.98 Vp
42.5470 144.3468 30.0 0.0 6.98 Vp
42.6198 144.2741 30.0 0.0 6.98 Vp
42.6924 144.2012 30.0 0.0 6.98 Vp
42.7651 144.1282 30.0 0.0 6.98 Vp
42.8377 144.0549 30.0 0.0 6.98 Vp
42.9103 143.9815 30.0 223.4 7.12 Vp
42.9828 143.9079 30.0 1217.3 7.18 Vp
43.0553 143.8342 30.0 1035.4 7.05 Vp
43.1277 143.7602 30.0 835.2 6.69 Vp
43.2001 143.6861 30.0 1799.4 7.26 Vp
43.2724 143.6118 30.0 996.2 7.01 Vp
43.3447 143.5374 30.0 164.4 6.79 Vp
43.4169 143.4627 30.0 207.5 6.99 Vp
43.4891 143.3879 30.0 119.2 6.56 Vp
43.5612 143.3129 30.0 27.6 6.36 Vp
43.6333 143.2377 30.0 127.4 7.06 Vp
43.7054 143.1624 30.0 146.7 6.82 Vp
43.7773 143.0868 30.0 42.5 7.10 Vp
43.8493 143.0111 30.0 15.1 6.98 Vp
43.9211 142.9352 30.0 0.0 6.98 Vp
43.9930 142.8592 30.0 0.0 6.98 Vp
42.6005 144.4456 30.0 0.0 6.98 Vp
42.6733 144.3730 30.0 0.0 6.98 Vp
42.7460 144.3001 30.0 0.0 6.98 Vp
42.8188 144.2271 30.0 0.0 6.98 Vp
42.8914 144.1540 30.0 0.0 6.98 Vp
42.9641 144.0806 30.0 33.9 7.00 Vp
43.0366 144.0071 30.0 394.0 6.98 Vp
43.1092 143.9334 30.0 654.5 6.97 Vp
43.1817 143.8595 30.0 802.9 6.89 Vp
43.2541 143.7854 30.0 760.8 6.61 Vp
43.3265 143.7112 30.0 732.2 6.93 Vp
43.3988 143.6368 30.0 296.6 6.87 Vp
43.4711 143.5622 30.0 274.1 7.09 Vp
43.5434 143.4874 30.0 176.9 7.10 Vp
43.6156 143.4125 30.0 25.6 6.63 Vp
43.6877 143.3374 30.0 20.9 6.98 Vp
43.7598 143.2621 30.0 21.5 6.98 Vp
43.8319 143.1866 30.0 18.4 6.98 Vp
43.9039 143.1109 30.0 6.5 6.98 Vp
43.9758 143.0351 30.0 0.0 6.98 Vp
44.0477 142.9591 30.0 0.0 6.98 Vp
42.6539 144.5446 30.0 0.0 6.98 Vp
42.7267 144.4720 30.0 0.0 6.98 Vp
42.7996 144.3992 30.0 0.0 6.98 Vp
42.8723 144.3263 30.0 0.0 6.98 Vp
42.9451 144.2532 30.0 0.0 6.98 Vp
43.0178 144.1799 30.0 0.0 6.98 Vp
43.0904 144.1064 30.0 0.0 6.98 Vp
43.1630 144.0327 30.0 2.7 6.98 Vp
43.2355 143.9589 30.0 13.2 6.98 Vp
43.3081 143.8849 30.0 2.5 6.98 Vp
43.3805 143.8107 30.0 34.9 7.02 Vp
43.4529 143.7364 30.0 84.1 6.84 Vp
43.5253 143.6618 30.0 39.9 6.87 Vp
43.5976 143.5871 30.0 86.2 7.21 Vp
43.6698 143.5123 30.0 27.4 7.00 Vp
43.7421 143.4372 30.0 0.0 6.98 Vp
43.8142 143.3619 30.0 0.0 6.98 Vp
43.8863 143.2865 30.0 0.0 6.98 Vp
43.9584 143.2109 30.0 0.0 6.98 Vp
44.0304 143.1351 30.0 0.0 6.98 Vp
44.1023 143.0591 30.0 0.0 6.98 Vp
41.0145 141.6463 35.0 0.0 7.23 Vp
41.0856 141.5722 35.0 0.0 7.29 Vp
41.1566 141.4979 35.0 0.0 7.42 Vp
41.2275 141.4235 35.0 0.0 7.59 Vp
41.2984 141.3489 35.0 0.8 7.59 Vp
41.3693 141.2741 35.0 0.5 7.49 Vp
41.4401 141.1992 35.0 0.0 7.38 Vp
41.5108 141.1241 35.0 0.0 7.25 Vp
41.5815 141.0488 35.0 0.0 7.25 Vp
41.6522 140.9734 35.0 0.0 7.26 Vp
41.7228 140.8978 35.0 0.0 7.24 Vp
41.7934 140.8221 35.0 0.0 7.20 Vp
41.8639 140.7461 35.0 0.0 7.22 Vp
41.9343 140.6700 35.0 0.0 7.17 Vp
42.0048 140.5938 35.0 0.0 7.02 Vp
42.0751 140.5174 35.0 0.0 7.16 Vp
42.1454 140.4408 35.0 0.0 7.25 Vp
42.2157 140.3640 35.0 0.0 7.29 Vp
42.2859 140.2871 35.0 0.0 7.25 Vp
42.3560 140.2100 35.0 0.0 7.40 Vp
42.4261 140.1327 35.0 0.0 7.31 Vp
41.0703 141.7406 35.0 0.0 7.23 Vp
41.1414 141.6665 35.0 0.0 7.36 Vp
41.2125 141.5922 35.0 0.0 7.55 Vp
41.2835 141.5179 35.0 0.0 7.70 Vp
41.3544 141.4433 35.0 76.0 7.59 Vp
41.4254 141.3686 35.0 242.0 7.51 Vp
41.4962 141.2937 35.0 70.7 7.52 Vp
41.5671 141.2186 35.0 0.8 7.33 Vp
41.6378 141.1434 35.0 1.2 7.24 Vp
41.7085 141.0680 35.0 6.0 7.10 Vp
41.7792 140.9924 35.0 3.6 7.15 Vp
41.8499 140.9167 35.0 1.0 7.09 Vp
41.9204 140.8408 35.0 0.0 7.12 Vp
41.9910 140.7648 35.0 0.0 7.03 Vp
42.0614 140.6886 35.0 0.0 7.22 Vp
42.1319 140.6122 35.0 0.0 7.41 Vp
42.2022 140.5356 35.0 0.0 7.49 Vp
42.2726 140.4589 35.0 0.0 7.52 Vp
42.3428 140.3820 35.0 0.0 7.42 Vp
42.4130 140.3049 35.0 0.0 7.38 Vp
42.4832 140.2277 35.0 0.0 7.13 Vp
41.1260 141.8350 35.0 0.0 7.23 Vp
41.1972 141.7609 35.0 0.0 7.39 Vp
41.2683 141.6868 35.0 0.0 7.66 Vp
41.3394 141.6124 35.0 0.0 7.57 Vp
41.4104 141.5379 35.0 40.5 7.33 Vp
41.4814 141.4632 35.0 162.6 7.34 Vp
41.5523 141.3883 35.0 232.5 7.61 Vp
41.6232 141.3133 35.0 52.2 7.38 Vp
41.6940 141.2381 35.0 17.0 7.09 Vp
41.7648 141.1628 35.0 224.2 7.19 Vp
41.8356 141.0873 35.0 221.1 7.07 Vp
41.9063 141.0116 35.0 85.8 7.12 Vp
41.9769 140.9357 35.0 8.3 7.16 Vp
42.0475 140.8597 35.0 2.1 7.40 Vp
42.1180 140.7835 35.0 0.5 7.67 Vp
42.1885 140.7071 35.0 0.1 7.71 Vp
42.2590 140.6306 35.0 0.0 7.74 Vp
42.3294 140.5539 35.0 0.0 7.69 Vp
42.3997 140.4771 35.0 0.0 7.56 Vp
42.4700 140.4000 35.0 0.0 7.27 Vp
42.5402 140.3228 35.0 0.0 7.11 Vp
41.1817 141.9296 35.0 0.0 7.23 Vp
41.2529 141.8556 35.0 0.0 7.35 Vp
41.3241 141.7814 35.0 0.0 7.54 Vp
41.3952 141.7071 35.0 5.4 7.36 Vp
41.4663 141.6326 35.0 115.7 7.15 Vp
41.5373 141.5580 35.0 97.9 7.18 Vp
41.6083 141.4832 35.0 352.3 7.61 Vp
41.6793 141.4082 35.0 198.3 7.61 Vp
41.7502 141.3330 35.0 128.5 7.88 Vp
41.8211 141.2577 35.0 348.3 7.67 Vp
41.8919 141.1822 35.0 481.9 7.32 Vp
41.9626 141.1066 35.0 361.1 7.15 Vp
42.0333 141.0308 35.0 280.8 7.38 Vp
42.1040 140.9548 35.0 3.1 7.42 Vp
42.1746 140.8786 35.0 2.0 7.63 Vp
42.2451 140.8023 35.0 0.9 7.68 Vp
42.3156 140.7258 35.0 0.0 7.71 Vp
42.3861 140.6491 35.0 0.0 7.58 Vp
42.4565 140.5723 35.0 0.0 7.42 Vp
42.5268 140.4953 35.0 0.0 7.23 Vp
42.5971 140.4182 35.0 0.0 7.21 Vp
41.2372 142.0244 35.0 0.0 7.23 Vp
41.3085 141.9504 35.0 0.0 7.30 Vp
41.3798 141.8763 35.0 0.0 7.34 Vp
41.4510 141.8020 35.0 5.0 7.23 Vp
41.5221 141.7276 35.0 57.8 7.06 Vp
41.5932 141.6530 35.0 353.0 7.17 Vp
41.6643 141.5782 35.0 285.6 7.62 Vp
41.7353 141.5032 35.0 153.1 7.87 Vp
41.8063 141.4281 35.0 230.6 7.56 Vp
41.8772 141.3528 35.0 287.5 7.60 Vp
41.9481 141.2774 35.0 359.3 7.51 Vp
42.0189 141.2018 35.0 851.5 7.35 Vp
42.0897 141.1260 35.0 312.1 7.44 Vp
42.1604 141.0500 35.0 17.4 7.26 Vp
42.2311 140.9739 35.0 2.6 7.37 Vp
42.3017 140.8976 35.0 0.0 7.48 Vp
42.3722 140.8212 35.0 0.0 7.47 Vp
42.4427 140.7446 35.0 0.0 7.46 Vp
42.5132 140.6678 35.0 0.0 7.42 Vp
42.5836 140.5908 35.0 0.0 7.26 Vp
42.6540 140.5136 35.0 0.0 7.28 Vp
41.2927 142.1193 35.0 0.0 7.23 Vp
41.3641 142.0454 35.0 0.0 7.32 Vp
41.4354 141.9713 35.0 0.0 7.22 Vp
41.5066 141.8971 35.0 1.2 7.17 Vp
41.5779 141.8226 35.0 175.8 7.14 Vp
41.6490 141.7481 35.0 377.2 7.30 Vp
41.7202 141.6733 35.0 69.0 7.54 Vp
41.7912 141.5984 35.0 46.3 7.59 Vp
41.8623 141.5234 35.0 514.9 7.31 Vp
41.9333 141.4481 35.0 537.6 7.31 Vp
42.0042 141.3727 35.0 1467.5 7.39 Vp
42.0751 141.2971 35.0 2165.7 7.36 Vp
42.1459 141.2214 35.0 472.2 7.50 Vp
42.2167 141.1455 35.0 296.7 7.18 Vp
42.2874 141.0694 35.0 174.9 7.24 Vp
42.3581 140.9931 35.0 69.6 7.44 Vp
42.4288 140.9167 35.0 12.0 7.47 Vp
42.4993 140.8401 35.0 0.0 7.38 Vp
42.5699 140.7634 35.0 0.0 7.38 Vp
42.6403 140.6864 35.0 0.0 7.33 Vp
42.7107 140.6093 35.0 0.0 7.37 Vp
41.3481 142.2144 35.0 0.0 7.23 Vp
41.4195 142.1405 35.0 0.0 7.34 Vp
41.4909 142.0665 35.0 0.0 7.35 Vp
41.5622 141.9923 35.0 6.1 7.21 Vp
41.6335 141.9179 35.0 691.6 7.34 Vp
41.7048 141.8434 35.0 876.3 7.54 Vp
41.7760 141.7687 35.0 116.5 7.62 Vp
41.8471 141.6938 35.0 370.3 7.62 Vp
41.9182 141.6188 35.0 1888.7 7.26 Vp
41.9893 141.5436 35.0 1480.7 7.26 Vp
42.0602 141.4682 35.0 1043.3 7.38 Vp
42.1312 141.3927 35.0 581.6 7.23 Vp
42.2021 141.3170 35.0 381.5 7.39 Vp
42.2730 141.2411 35.0 376.3 7.13 Vp
42.3438 141.1651 35.0 416.2 7.20 Vp
42.4145 141.0888 35.0 430.7 7.49 Vp
42.4852 141.0124 35.0 223.8 7.35 Vp
42.5558 140.9359 35.0 3.7 7.39 Vp
42.6264 140.8592 35.0 0.3 7.44 Vp
42.6970 140.7823 35.0 0.0 7.42 Vp
42.7674 140.7052 35.0 0.0 7.41 Vp
41.4035 142.3096 35.0 0.0 7.23 Vp
41.4749 142.2358 35.0 0.0 7.34 Vp
41.5464 142.1618 35.0 0.0 7.36 Vp
41.6178 142.0877 35.0 22.0 7.32 Vp
41.6891 142.0134 35.0 798.7 7.55 Vp
41.7604 141.9389 35.0 806.8 7.75 Vp
41.8317 141.8642 35.0 205.6 7.80 Vp
41.9029 141.7894 35.0 1059.0 7.58 Vp
41.9740 141.7144 35.0 2619.0 7.35 Vp
42.0452 141.6392 35.0 1881.9 7.38 Vp
42.1162 141.5639 35.0 704.4 7.53 Vp
42.1872 141.4884 35.0 249.4 7.43 Vp
42.2582 141.4127 35.0 431.3 7.34 Vp
42.3291 141.3369 35.0 322.0 7.23 Vp
42.4000 141.2609 35.0 253.0 7.18 Vp
42.4708 141.1847 35.0 538.4 7.33 Vp
42.5416 141.1084 35.0 381.2 7.32 Vp
42.6123 141.0318 35.0 164.6 7.41 Vp
42.6829 140.9551 35.0 79.6 7.52 Vp
42.7535 140.8783 35.0 5.7 7.45 Vp
42.8241 140.8012 35.0 0.0 7.31 Vp
41.4587 142.4051 35.0 0.0 7.23 Vp
41.5303 142.3313 35.0 0.0 7.23 Vp
41.6018 142.2574 35.0 0.0 7.43 Vp
41.6732 142.1832 35.0 32.1 7.47 Vp
41.7446 142.1090 35.0 523.4 7.68 Vp
41.8160 142.0345 35.0 497.4 7.80 Vp
41.8873 141.9599 35.0 411.0 7.78 Vp
41.9586 141.8851 35.0 1322.0 7.57 Vp
42.0298 141.8102 35.0 1581.3 7.40 Vp
42.1010 141.7350 35.0 871.7 7.37 Vp
42.1721 141.6597 35.0 339.0 7.42 Vp
42.2432 141.5843 35.0 667.2 7.32 Vp
42.3142 141.5087 35.0 1289.0 7.24 Vp
42.3852 141.4328 35.0 678.9 7.37 Vp
42.4561 141.3569 35.0 529.3 7.28 Vp
42.5270 141.2807 35.0 586.4 7.23 Vp
42.5978 141.2044 35.0 234.0 7.07 Vp
42.6686 141.1279 35.0 241.1 7.36 Vp
42.7393 141.0513 35.0 200.1 7.51 Vp
42.8100 140.9745 35.0 40.6 7.35 Vp
42.8806 140.8975 35.0 0.0 7.29 Vp
41.5139 142.5007 35.0 0.0 7.23 Vp
41.5855 142.4269 35.0 0.0 7.23 Vp
41.6571 142.3530 35.0 0.2 7.47 Vp
41.7286 142.2790 35.0 31.2 7.62 Vp
41.8001 142.2047 35.0 282.1 7.77 Vp
41.8715 142.1303 35.0 326.7 7.80 Vp
41.9429 142.0558 35.0 678.4 7.75 Vp
42.0142 141.9810 35.0 856.8 7.59 Vp
42.0855 141.9061 35.0 809.1 7.37 Vp
42.1568 141.8310 35.0 348.1 7.20 Vp
42.2279 141.7558 35.0 210.9 7.13 Vp
42.2991 141.6803 35.0 752.3 7.12 Vp
42.3702 141.6048 35.0 1590.0 7.20 Vp
42.4412 141.5290 35.0 1544.7 7.43 Vp
42.5122 141.4530 35.0 1048.3 7.31 Vp
42.5832 141.3770 35.0 866.6 7.57 Vp
42.6540 141.3007 35.0 139.0 7.16 Vp
42.7249 141.2242 35.0 128.4 7.23 Vp
42.7957 141.1476 35.0 95.6 7.44 Vp
42.8664 141.0708 35.0 13.3 7.30 Vp
42.9371 140.9939 35.0 0.0 7.35 Vp
41.5690 142.5964 35.0 0.0 7.23 Vp
41.6407 142.5228 35.0 0.0 7.23 Vp
41.7123 142.4489 35.0 1.3 7.55 Vp
41.7839 142.3749 35.0 31.9 7.76 Vp
41.8554 142.3007 35.0 125.4 7.87 Vp
41.9269 142.2263 35.0 337.8 8.05 Vp
41.9984 142.1518 35.0 771.4 7.80 Vp
42.0698 142.0771 35.0 558.6 7.60 Vp
42.1411 142.0022 35.0 627.0 7.37 Vp
42.2124 141.9272 35.0 259.1 7.17 Vp
42.2837 141.8520 35.0 523.5 7.36 Vp
42.3549 141.7766 35.0 799.4 7.18 Vp
42.4261 141.7010 35.0 1174.4 7.36 Vp
42.4972 141.6253 35.0 942.3 7.41 Vp
42.5682 141.5494 35.0 1242.9 7.66 Vp
42.6392 141.4733 35.0 781.2 7.51 Vp
42.7102 141.3971 35.0 316.7 7.34 Vp
42.7811 141.3207 35.0 87.1 7.17 Vp
42.8519 141.2441 35.0 47.2 7.32 Vp
42.9227 141.1674 35.0 10.9 7.26 Vp
42.9934 141.0904 35.0 0.0 7.35 Vp
41.6240 142.6924 35.0 0.0 7.23 Vp
41.6958 142.6187 35.0 0.0 7.36 Vp
41.7675 142.5449 35.0 7.2 7.70 Vp
41.8391 142.4709 35.0 70.8 7.91 Vp
41.9107 142.3968 35.0 257.1 8.11 Vp
41.9823 142.3225 35.0 988.7 7.88 Vp
42.0538 142.2480 35.0 803.7 7.83 Vp
42.1252 142.1733 35.0 612.5 7.55 Vp
42.1967 142.0985 35.0 605.8 7.37 Vp
42.2680 142.0235 35.0 505.5 7.18 Vp
42.3394 141.9483 35.0 673.0 7.23 Vp
42.4106 141.8730 35.0 818.8 7.40 Vp
42.4818 141.7975 35.0 1125.5 7.33 Vp
42.5530 141.7218 35.0 1164.7 7.34 Vp
42.6241 141.6459 35.0 507.9 7.35 Vp
42.6952 141.5699 35.0 374.3 7.48 Vp
42.7662 141.4937 35.0 749.0 7.51 Vp
42.8372 141.4173 35.0 252.8 7.24 Vp
42.9081 141.3408 35.0 17.2 7.23 Vp
42.9789 141.2641 35.0 0.0 7.14 Vp
43.0497 141.1872 35.0 0.0 7.25 Vp
41.6790 142.7885 35.0 0.0 7.23 Vp
41.7508 142.7149 35.0 0.4 7.40 Vp
41.8225 142.6411 35.0 182.8 7.76 Vp
41.8943 142.5672 35.0 296.5 7.37 Vp
41.9659 142.4930 35.0 484.1 7.41 Vp
42.0375 142.4188 35.0 2998.8 8.40 Vp
42.1091 142.3443 35.0 1325.7 7.11 Vp
42.1806 142.2697 35.0 923.8 7.43 Vp
42.2521 142.1949 35.0 846.9 7.19 Vp
42.3236 142.1200 35.0 667.4 7.09 Vp
42.3949 142.0448 35.0 543.2 6.48 Vp
42.4663 141.9696 35.0 651.4 7.11 Vp
42.5376 141.8941 35.0 1210.3 7.49 Vp
42.6088 141.8185 35.0 1148.6 6.86 Vp
42.6800 141.7426 35.0 490.3 6.63 Vp
42.7511 141.6667 35.0 916.5 7.75 Vp
42.8222 141.5905 35.0 1678.0 8.48 Vp
42.8932 141.5142 35.0 324.5 7.51 Vp
42.9642 141.4377 35.0 53.2 6.89 Vp
43.0351 141.3610 35.0 0.0 7.26 Vp
43.1060 141.2841 35.0 0.0 7.23 Vp
41.7339 142.8847 35.0 0.0 7.30 Vp
41.8057 142.8112 35.0 5.9 7.47 Vp
41.8775 142.7374 35.0 331.5 7.66 Vp
41.9493 142.6636 35.0 472.9 6.82 Vp
42.0210 142.5895 35.0 630.1 6.36 Vp
42.0927 142.5153 35.0 1916.6 6.75 Vp
42.1644 142.4409 35.0 1232.1 6.82 Vp
42.2360 142.3663 35.0 1718.4 7.61 Vp
42.3075 142.2915 35.0 1049.3 7.05 Vp
42.3790 142.2166 35.0 1195.4 7.22 Vp
42.4504 142.1416 35.0 919.2 7.03 Vp
42.5218 142.0663 35.0 613.7 6.33 Vp
42.5932 141.9909 35.0 1001.5 6.85 Vp
42.6645 141.9153 35.0 1589.8 7.58 Vp
42.7357 141.8395 35.0 1154.1 7.75 Vp
42.8069 141.7636 35.0 489.7 7.18 Vp
42.8781 141.6875 35.0 598.9 7.16 Vp
42.9492 141.6112 35.0 152.4 7.46 Vp
43.0202 141.5347 35.0 39.4 7.21 Vp
43.0912 141.4581 35.0 0.0 7.34 Vp
43.1621 141.3813 35.0 0.0 7.25 Vp
41.7613 142.9329 35.0 0.0 7.32 Vp
41.8332 142.8594 35.0 5.7 7.48 Vp
41.9050 142.7857 35.0 261.6 7.45 Vp
41.9768 142.7118 35.0 424.0 6.11 Vp
42.0486 142.6378 35.0 634.6 5.84 Vp
42.1203 142.5636 35.0 1041.7 6.63 Vp
42.1920 142.4892 35.0 1153.6 6.58 Vp
42.2636 142.4147 35.0 2168.1 7.37 Vp
42.3352 142.3399 35.0 1612.4 7.55 Vp
42.4067 142.2650 35.0 630.7 6.62 Vp
42.4782 142.1900 35.0 855.1 7.37 Vp
42.5496 142.1147 35.0 1047.9 6.83 Vp
42.6210 142.0394 35.0 792.3 6.43 Vp
42.6923 141.9638 35.0 732.5 6.92 Vp
42.7636 141.8880 35.0 777.6 7.51 Vp
42.8348 141.8121 35.0 608.1 7.73 Vp
42.9060 141.7360 35.0 139.5 7.36 Vp
42.9771 141.6597 35.0 66.2 7.52 Vp
43.0482 141.5833 35.0 11.3 7.20 Vp
43.1192 141.5067 35.0 0.0 7.21 Vp
43.1902 141.4299 35.0 0.0 7.17 Vp
41.7886 142.9811 35.0 0.0 7.33 Vp
41.8606 142.9076 35.0 44.0 7.51 Vp
41.9324 142.8340 35.0 408.3 7.36 Vp
42.0043 142.7601 35.0 448.2 6.03 Vp
42.0761 142.6861 35.0 1361.4 6.01 Vp
42.1478 142.6119 35.0 2084.2 6.42 Vp
42.2195 142.5376 35.0 1945.3 6.45 Vp
42.2912 142.4630 35.0 2269.9 6.80 Vp
42.3628 142.3884 35.0 2589.1 7.77 Vp
42.4343 142.3135 35.0 890.5 7.07 Vp
42.5059 142.2384 35.0 1127.3 7.42 Vp
42.5773 142.1632 35.0 1325.8 7.30 Vp
42.6487 142.0879 35.0 404.2 6.63 Vp
42.7201 142.0123 35.0 376.0 6.79 Vp
42.7914 141.9366 35.0 723.2 7.47 Vp
42.8627 141.8607 35.0 880.1 7.72 Vp
42.9339 141.7846 35.0 208.3 7.41 Vp
43.0050 141.7084 35.0 96.5 7.54 Vp
43.0761 141.6319 35.0 3.4 7.21 Vp
43.1472 141.5553 35.0 0.0 7.20 Vp
43.2182 141.4786 35.0 0.0 7.17 Vp
41.8160 143.0294 35.0 0.0 7.37 Vp
41.8880 142.9559 35.0 27.9 7.33 Vp
41.9599 142.8823 35.0 254.0 7.15 Vp
42.0317 142.8085 35.0 696.4 6.18 Vp
42.1036 142.7345 35.0 1730.8 6.16 Vp
42.1754 142.6603 35.0 1689.4 5.90 Vp
42.2471 142.5860 35.0 2275.4 6.24 Vp
42.3188 142.5115 35.0 1488.6 6.14 Vp
42.3904 142.4368 35.0 3626.3 7.91 Vp
42.4620 142.3620 35.0 1770.3 7.62 Vp
42.5335 142.2870 35.0 1115.5 7.15 Vp
42.6050 142.2118 35.0 1347.9 7.19 Vp
42.6765 142.1364 35.0 691.7 7.31 Vp
42.7479 142.0609 35.0 351.2 6.89 Vp
42.8192 141.9852 35.0 600.7 6.99 Vp
42.8905 141.9093 35.0 344.3 6.95 Vp
42.9617 141.8332 35.0 337.0 7.91 Vp
43.0329 141.7570 35.0 215.7 7.42 Vp
43.1041 141.6806 35.0 24.1 7.08 Vp
43.1751 141.6040 35.0 0.0 6.95 Vp
43.2462 141.5273 35.0 0.0 7.02 Vp
41.8434 143.0777 35.0 0.0 7.28 Vp
41.9153 143.0043 35.0 9.5 7.33 Vp
41.9873 142.9307 35.0 214.8 6.82 Vp
42.0592 142.8569 35.0 869.1 6.74 Vp
42.1310 142.7829 35.0 1991.6 6.47 Vp
42.2029 142.7088 35.0 2236.3 6.37 Vp
42.2746 142.6344 35.0 2088.2 6.27 Vp
42.3463 142.5600 35.0 1318.5 6.14 Vp
42.4180 142.4853 35.0 2614.8 6.96 Vp
42.4896 142.4105 35.0 1560.4 6.87 Vp
42.5612 142.3355 35.0 1160.4 6.93 Vp
42.6327 142.2603 35.0 1796.3 7.15 Vp
42.7042 142.1850 35.0 1215.7 7.11 Vp
42.7756 142.1095 35.0 449.8 7.36 Vp
42.8470 142.0338 35.0 765.7 7.16 Vp
42.9183 141.9579 35.0 773.8 7.25 Vp
42.9896 141.8819 35.0 814.8 8.24 Vp
43.0608 141.8057 35.0 312.9 7.24 Vp
43.1320 141.7293 35.0 39.0 7.18 Vp
43.2031 141.6528 35.0 0.0 6.97 Vp
43.2742 141.5760 35.0 0.0 7.03 Vp
41.8707 143.1261 35.0 0.0 7.31 Vp
41.9427 143.0527 35.0 14.1 7.16 Vp
42.0147 142.9790 35.0 228.1 6.97 Vp
42.0866 142.9053 35.0 1106.9 7.42 Vp
42.1585 142.8313 35.0 2197.4 6.28 Vp
42.2303 142.7572 35.0 2156.4 6.13 Vp
42.3021 142.6829 35.0 1694.0 6.24 Vp
42.3739 142.6085 35.0 864.5 6.04 Vp
42.4456 142.5339 35.0 2032.5 7.11 Vp
42.5172 142.4591 35.0 1332.7 6.98 Vp
42.5888 142.3841 35.0 596.3 6.77 Vp
42.6604 142.3089 35.0 1509.5 7.10 Vp
42.7319 142.2336 35.0 745.9 6.76 Vp
42.8034 142.1581 35.0 632.1 7.58 Vp
42.8748 142.0825 35.0 909.0 7.39 Vp
42.9461 142.0067 35.0 978.8 6.94 Vp
43.0174 141.9306 35.0 542.6 7.92 Vp
43.0887 141.8544 35.0 205.4 7.53 Vp
43.1599 141.7781 35.0 31.2 7.33 Vp
43.2310 141.7016 35.0 0.0 6.82 Vp
43.3021 141.6248 35.0 0.0 6.96 Vp
41.8980 143.1745 35.0 0.0 7.23 Vp
41.9700 143.1011 35.0 2.2 7.10 Vp
42.0420 143.0275 35.0 122.0 6.97 Vp
42.1140 142.9538 35.0 1257.5 7.10 Vp
42.1859 142.8798 35.0 2359.1 6.68 Vp
42.2578 142.8057 35.0 2335.8 6.69 Vp
42.3296 142.7315 35.0 1332.1 6.34 Vp
42.4014 142.6571 35.0 915.6 6.31 Vp
42.4731 142.5825 35.0 2526.3 6.95 Vp
42.5448 142.5077 35.0 2624.3 7.25 Vp
42.6165 142.4327 35.0 2286.3 7.53 Vp
42.6880 142.3576 35.0 1576.7 7.32 Vp
42.7596 142.2823 35.0 437.4 6.45 Vp
42.8311 142.2068 35.0 653.0 7.69 Vp
42.9025 142.1312 35.0 603.2 7.44 Vp
42.9739 142.0554 35.0 181.3 6.65 Vp
43.0452 141.9794 35.0 176.5 7.46 Vp
43.1165 141.9032 35.0 371.9 7.93 Vp
43.1877 141.8269 35.0 113.0 7.35 Vp
43.2589 141.7504 35.0 0.0 6.84 Vp
43.3300 141.6737 35.0 0.0 7.00 Vp
41.9253 143.2229 35.0 0.0 7.23 Vp
41.9973 143.1496 35.0 9.7 7.15 Vp
42.0694 143.0760 35.0 223.4 7.12 Vp
42.1414 143.0023 35.0 1178.1 6.88 Vp
42.2133 142.9284 35.0 2108.0 6.80 Vp
42.2852 142.8543 35.0 3918.3 7.05 Vp
42.3571 142.7801 35.0 2964.6 6.97 Vp
42.4289 142.7057 35.0 1226.9 6.17 Vp
42.5007 142.6311 35.0 1974.9 7.03 Vp
42.5724 142.5563 35.0 1801.7 6.69 Vp
42.6441 142.4814 35.0 2023.4 6.88 Vp
42.7157 142.4063 35.0 1171.6 6.91 Vp
42.7873 142.3310 35.0 771.1 7.48 Vp
42.8588 142.2556 35.0 420.9 7.12 Vp
42.9302 142.1800 35.0 203.4 6.70 Vp
43.0017 142.1042 35.0 67.6 6.92 Vp
43.0730 142.0282 35.0 113.0 6.88 Vp
43.1443 141.9521 35.0 119.3 7.22 Vp
43.2156 141.8758 35.0 56.1 7.29 Vp
43.2868 141.7993 35.0 0.0 6.85 Vp
43.3580 141.7226 35.0 0.0 6.88 Vp
41.9525 143.2714 35.0 0.0 7.23 Vp
42.0246 143.1981 35.0 34.2 7.02 Vp
42.0967 143.1245 35.0 265.2 6.92 Vp
42.1687 143.0508 35.0 934.8 6.68 Vp
42.2407 142.9770 35.0 2304.4 6.77 Vp
42.3127 142.9029 35.0 4933.5 7.10 Vp
42.3845 142.8287 35.0 4836.6 6.88 Vp
42.4564 142.7543 35.0 2227.0 6.81 Vp
42.5282 142.6798 35.0 1169.4 6.38 Vp
42.5999 142.6050 35.0 747.7 6.59 Vp
42.6716 142.5301 35.0 914.9 6.38 Vp
42.7433 142.4551 35.0 847.0 6.87 Vp
42.8149 142.3798 35.0 1138.3 7.33 Vp
42.8864 142.3044 35.0 302.4 7.03 Vp
42.9579 142.2288 35.0 336.4 6.75 Vp
43.0294 142.1530 35.0 184.0 6.77 Vp
43.1008 142.0771 35.0 92.5 6.85 Vp
43.1721 142.0010 35.0 74.2 7.18 Vp
43.2434 141.9247 35.0 60.0 7.31 Vp
43.3147 141.8482 35.0 0.0 6.84 Vp
43.3859 141.7715 35.0 0.0 6.95 Vp
41.9798 143.3199 35.0 0.0 7.23 Vp
42.0519 143.2466 35.0 8.7 7.18 Vp
42.1240 143.1731 35.0 409.3 7.06 Vp
42.1961 143.0994 35.0 876.3 6.39 Vp
42.2681 143.0256 35.0 2041.3 6.84 Vp
42.3401 142.9516 35.0 3228.7 6.80 Vp
42.4120 142.8774 35.0 2143.5 6.53 Vp
42.4839 142.8030 35.0 1385.8 6.73 Vp
42.5557 142.7285 35.0 671.8 6.48 Vp
42.6275 142.6538 35.0 465.7 6.42 Vp
42.6992 142.5789 35.0 645.4 6.54 Vp
42.7709 142.5038 35.0 1107.1 6.66 Vp
42.8425 142.4286 35.0 754.0 7.13 Vp
42.9141 142.3532 35.0 859.3 7.98 Vp
42.9856 142.2776 35.0 335.9 7.09 Vp
43.0571 142.2019 35.0 193.9 6.96 Vp
43.1285 142.1260 35.0 171.6 6.78 Vp
43.1999 142.0499 35.0 107.5 6.81 Vp
43.2712 141.9736 35.0 75.4 7.28 Vp
43.3425 141.8972 35.0 0.0 6.96 Vp
43.4137 141.8205 35.0 0.0 6.99 Vp
42.0070 143.3685 35.0 0.0 7.23 Vp
42.0792 143.2952 35.0 34.8 7.23 Vp
42.1513 143.2217 35.0 353.8 6.86 Vp
42.2234 143.1481 35.0 758.0 6.68 Vp
42.2954 143.0742 35.0 2144.4 6.84 Vp
42.3674 143.0002 35.0 3452.6 6.84 Vp
42.4394 142.9261 35.0 2170.7 6.57 Vp
42.5113 142.8517 35.0 1746.6 6.97 Vp
42.5832 142.7772 35.0 1027.2 6.86 Vp
42.6550 142.7026 35.0 494.6 6.43 Vp
42.7267 142.6277 35.0 765.0 7.15 Vp
42.7984 142.5527 35.0 2064.1 7.64 Vp
42.8701 142.4775 35.0 1066.7 7.27 Vp
42.9417 142.4021 35.0 865.1 7.41 Vp
43.0133 142.3265 35.0 293.0 7.15 Vp
43.0848 142.2508 35.0 121.6 6.67 Vp
43.1563 142.1749 35.0 178.8 6.71 Vp
43.2277 142.0988 35.0 41.8 6.55 Vp
43.2990 142.0226 35.0 7.3 6.91 Vp
43.3703 141.9462 35.0 0.0 6.95 Vp
43.4416 141.8696 35.0 0.0 7.05 Vp
42.0342 143.4171 35.0 0.0 7.23 Vp
42.1064 143.3438 35.0 28.8 7.23 Vp
42.1786 143.2704 35.0 240.6 7.06 Vp
42.2507 143.1967 35.0 684.9 7.19 Vp
42.3228 143.1229 35.0 1319.1 6.18 Vp
42.3948 143.0490 35.0 2823.3 6.26 Vp
42.4668 142.9748 35.0 3428.6 7.01 Vp
42.5387 142.9005 35.0 2246.6 7.34 Vp
42.6106 142.8260 35.0 2138.0 7.14 Vp
42.6824 142.7514 35.0 803.0 6.90 Vp
42.7542 142.6765 35.0 619.0 6.44 Vp
42.8260 142.6015 35.0 878.1 7.11 Vp
42.8977 142.5264 35.0 485.5 7.10 Vp
42.9693 142.4510 35.0 243.7 6.68 Vp
43.0409 142.3755 35.0 484.1 7.04 Vp
43.1125 142.2998 35.0 95.6 6.66 Vp
43.1840 142.2239 35.0 106.4 6.95 Vp
43.2554 142.1478 35.0 14.8 6.72 Vp
43.3268 142.0716 35.0 0.2 6.80 Vp
43.3981 141.9952 35.0 0.0 7.00 Vp
43.4694 141.9186 35.0 0.0 7.03 Vp
42.0614 143.4657 35.0 0.0 7.23 Vp
42.1336 143.3925 35.0 8.9 7.23 Vp
42.2058 143.3191 35.0 94.3 6.93 Vp
42.2780 143.2455 35.0 317.5 6.78 Vp
42.3501 143.1717 35.0 813.2 6.52 Vp
42.4221 143.0977 35.0 2289.3 7.01 Vp
42.4941 143.0236 35.0 3976.8 7.74 Vp
42.5661 142.9493 35.0 3001.1 7.38 Vp
42.6380 142.8749 35.0 2818.5 7.84 Vp
42.7099 142.8003 35.0 1269.2 6.96 Vp
42.7817 142.7254 35.0 916.2 7.11 Vp
42.8535 142.6505 35.0 1137.6 7.23 Vp
42.9252 142.5753 35.0 565.4 7.65 Vp
42.9969 142.5000 35.0 543.5 7.44 Vp
43.0686 142.4245 35.0 425.4 7.60 Vp
43.1401 142.3488 35.0 280.3 7.30 Vp
43.2117 142.2729 35.0 98.0 7.25 Vp
43.2831 142.1969 35.0 31.1 6.86 Vp
43.3545 142.1207 35.0 0.0 6.85 Vp
43.4259 142.0443 35.0 0.0 7.04 Vp
43.4972 141.9678 35.0 0.0 7.12 Vp
42.0885 143.5145 35.0 0.0 7.23 Vp
42.1608 143.4412 35.0 0.4 7.23 Vp
42.2330 143.3678 35.0 45.0 7.16 Vp
42.3052 143.2942 35.0 194.6 7.17 Vp
42.3774 143.2205 35.0 755.9 7.21 Vp
42.4494 143.1466 35.0 2749.8 8.00 Vp
42.5215 143.0725 35.0 5289.8 8.43 Vp
42.5935 142.9982 35.0 4406.8 8.54 Vp
42.6654 142.9238 35.0 2532.4 7.79 Vp
42.7374 142.8492 35.0 3530.9 8.90 Vp
42.8092 142.7744 35.0 1847.4 8.08 Vp
42.8810 142.6994 35.0 706.3 7.07 Vp
42.9528 142.6243 35.0 311.0 6.70 Vp
43.0245 142.5490 35.0 828.3 7.35 Vp
43.0962 142.4735 35.0 697.4 7.58 Vp
43.1678 142.3978 35.0 241.6 7.51 Vp
43.2393 142.3220 35.0 105.4 6.97 Vp
43.3108 142.2460 35.0 145.5 7.05 Vp
43.3823 142.1698 35.0 20.2 6.83 Vp
43.4537 142.0935 35.0 0.0 7.00 Vp
43.5250 142.0169 35.0 0.0 7.01 Vp
42.1157 143.5632 35.0 0.0 7.23 Vp
42.1880 143.4900 35.0 0.0 7.23 Vp
42.2602 143.4166 35.0 19.1 7.12 Vp
42.3324 143.3430 35.0 621.2 8.35 Vp
42.4046 143.2693 35.0 1004.3 7.51 Vp
42.4767 143.1954 35.0 3896.3 8.08 Vp
42.5488 143.1214 35.0 4529.2 7.69 Vp
42.6209 143.0471 35.0 3461.4 8.15 Vp
42.6928 142.9727 35.0 2540.8 8.29 Vp
42.7648 142.8981 35.0 3636.7 8.32 Vp
42.8367 142.8233 35.0 2623.3 7.66 Vp
42.9085 142.7484 35.0 385.3 6.83 Vp
42.9803 142.6733 35.0 101.7 6.34 Vp
43.0520 142.5980 35.0 474.7 7.26 Vp
43.1237 142.5226 35.0 514.9 7.57 Vp
43.1954 142.4469 35.0 163.9 7.21 Vp
43.2670 142.3711 35.0 135.1 7.45 Vp
43.3385 142.2952 35.0 155.8 7.34 Vp
43.4100 142.2190 35.0 23.4 6.88 Vp
43.4814 142.1426 35.0 0.0 7.11 Vp
43.5528 142.0661 35.0 0.0 7.06 Vp
42.1428 143.6119 35.0 0.0 7.23 Vp
42.2151 143.5388 35.0 1.0 7.23 Vp
42.2874 143.4654 35.0 38.4 7.23 Vp
42.3597 143.3919 35.0 1057.0 9.34 Vp
42.4319 143.3182 35.0 1976.9 8.20 Vp
42.5040 143.2443 35.0 3766.9 8.95 Vp
42.5761 143.1703 35.0 3982.7 8.85 Vp
42.6482 143.0961 35.0 2725.6 8.44 Vp
42.7202 143.0217 35.0 2467.7 8.58 Vp
42.7922 142.9471 35.0 1686.9 7.72 Vp
42.8641 142.8724 35.0 2622.6 8.69 Vp
42.9360 142.7975 35.0 1714.0 8.11 Vp
43.0078 142.7224 35.0 105.5 6.54 Vp
43.0796 142.6471 35.0 148.1 6.71 Vp
43.1513 142.5717 35.0 280.1 7.19 Vp
43.2230 142.4961 35.0 225.8 7.57 Vp
43.2946 142.4203 35.0 178.5 7.54 Vp
43.3661 142.3443 35.0 127.0 7.12 Vp
43.4377 142.2682 35.0 3.6 7.06 Vp
43.5091 142.1919 35.0 0.0 6.96 Vp
43.5805 142.1154 35.0 0.0 6.83 Vp
42.1699 143.6608 35.0 0.0 7.23 Vp
42.2422 143.5876 35.0 1.0 7.23 Vp
42.3146 143.5143 35.0 26.8 7.23 Vp
42.3868 143.4408 35.0 182.3 7.80 Vp
42.4591 143.3671 35.0 957.2 8.06 Vp
42.5313 143.2933 35.0 2142.4 8.35 Vp
42.6034 143.2193 35.0 4290.0 8.54 Vp
42.6755 143.1451 35.0 3907.5 8.54 Vp
42.7475 143.0707 35.0 2712.3 8.47 Vp
42.8196 142.9962 35.0 2033.4 8.21 Vp
42.8915 142.9214 35.0 1942.1 7.25 Vp
42.9634 142.8466 35.0 1057.8 7.94 Vp
43.0353 142.7715 35.0 73.7 6.59 Vp
43.1071 142.6963 35.0 118.2 6.69 Vp
43.1788 142.6208 35.0 158.2 6.77 Vp
43.2505 142.5453 35.0 92.4 6.99 Vp
43.3222 142.4695 35.0 196.6 7.69 Vp
43.3938 142.3936 35.0 108.5 7.57 Vp
43.4653 142.3175 35.0 11.5 7.09 Vp
43.5368 142.2412 35.0 0.0 6.86 Vp
43.6083 142.1647 35.0 0.0 6.83 Vp
42.1970 143.7096 35.0 0.0 7.23 Vp
42.2694 143.6365 35.0 0.0 7.23 Vp
42.3417 143.5632 35.0 4.9 7.23 Vp
42.4140 143.4897 35.0 19.4 7.49 Vp
42.4863 143.4160 35.0 250.9 7.95 Vp
42.5585 143.3422 35.0 1204.5 7.79 Vp
42.6307 143.2682 35.0 3511.9 8.55 Vp
42.7028 143.1941 35.0 4332.5 8.29 Vp
42.7749 143.1198 35.0 2421.5 8.08 Vp
42.8469 143.0452 35.0 1329.0 7.46 Vp
42.9189 142.9706 35.0 384.4 7.13 Vp
42.9908 142.8957 35.0 455.9 7.83 Vp
43.0627 142.8206 35.0 791.7 7.39 Vp
43.1346 142.7455 35.0 300.2 6.99 Vp
43.2063 142.6701 35.0 139.4 6.82 Vp
43.2781 142.5945 35.0 108.5 7.25 Vp
43.3498 142.5188 35.0 197.9 7.95 Vp
43.4214 142.4428 35.0 87.8 7.85 Vp
43.4930 142.3668 35.0 74.0 7.80 Vp
43.5645 142.2905 35.0 0.0 6.96 Vp
43.6360 142.2140 35.0 0.0 7.00 Vp
42.2240 143.7585 35.0 0.0 7.23 Vp
42.2964 143.6854 35.0 0.0 7.23 Vp
42.3688 143.6121 35.0 1.2 7.23 Vp
42.4412 143.5387 35.0 15.3 7.62 Vp
42.5135 143.4651 35.0 164.3 7.56 Vp
42.5857 143.3913 35.0 932.2 7.72 Vp
42.6579 143.3173 35.0 2224.2 7.56 Vp
42.7301 143.2431 35.0 3813.7 8.33 Vp
42.8022 143.1689 35.0 2212.9 8.10 Vp
42.8742 143.0944 35.0 2072.4 8.39 Vp
42.9463 143.0197 35.0 716.9 7.43 Vp
43.0182 142.9449 35.0 481.5 7.31 Vp
43.0901 142.8699 35.0 1714.8 7.68 Vp
43.1620 142.7947 35.0 615.4 7.16 Vp
43.2338 142.7193 35.0 120.4 6.60 Vp
43.3056 142.6438 35.0 193.4 7.53 Vp
43.3773 142.5681 35.0 162.2 7.72 Vp
43.4490 142.4922 35.0 76.1 7.61 Vp
43.5206 142.4161 35.0 67.5 7.22 Vp
43.5921 142.3398 35.0 0.0 6.99 Vp
43.6636 142.2634 35.0 0.0 7.01 Vp
42.2510 143.8074 35.0 0.0 7.23 Vp
42.3235 143.7344 35.0 0.0 7.23 Vp
42.3959 143.6611 35.0 1.5 7.23 Vp
42.4683 143.5877 35.0 12.1 7.23 Vp
42.5406 143.5141 35.0 182.3 7.82 Vp
42.6129 143.4403 35.0 1147.1 7.75 Vp
42.6851 143.3664 35.0 2012.2 7.46 Vp
42.7573 143.2923 35.0 3106.6 8.08 Vp
42.8295 143.2180 35.0 2143.6 8.05 Vp
42.9016 143.1435 35.0 2196.0 8.01 Vp
42.9736 143.0689 35.0 902.2 7.52 Vp
43.0456 142.9941 35.0 279.2 6.96 Vp
43.1175 142.9191 35.0 711.6 7.61 Vp
43.1894 142.8439 35.0 688.0 7.37 Vp
43.2613 142.7686 35.0 107.9 6.66 Vp
43.3331 142.6931 35.0 209.9 7.20 Vp
43.4048 142.6174 35.0 118.2 7.62 Vp
43.4765 142.5415 35.0 19.5 7.02 Vp
43.5482 142.4655 35.0 0.6 7.23 Vp
43.6198 142.3893 35.0 0.0 7.18 Vp
43.6913 142.3129 35.0 0.0 7.18 Vp
42.2781 143.8564 35.0 0.0 7.23 Vp
42.3505 143.7834 35.0 0.0 7.23 Vp
42.4230 143.7101 35.0 1.1 7.23 Vp
42.4954 143.6367 35.0 8.8 7.23 Vp
42.5677 143.5632 35.0 181.3 7.50 Vp
42.6401 143.4894 35.0 918.2 7.47 Vp
42.7123 143.4155 35.0 3205.4 8.55 Vp
42.7845 143.3414 35.0 3094.4 8.38 Vp
42.8567 143.2672 35.0 1853.5 7.65 Vp
42.9288 143.1927 35.0 1561.1 7.74 Vp
43.0009 143.1181 35.0 1235.3 7.72 Vp
43.0730 143.0433 35.0 683.6 7.27 Vp
43.1449 142.9684 35.0 241.0 6.70 Vp
43.2169 142.8932 35.0 419.0 6.78 Vp
43.2887 142.8179 35.0 72.1 6.85 Vp
43.3606 142.7424 35.0 172.5 6.98 Vp
43.4324 142.6668 35.0 99.7 7.23 Vp
43.5041 142.5909 35.0 74.4 7.35 Vp
43.5757 142.5149 35.0 5.1 7.22 Vp
43.6474 142.4387 35.0 0.0 7.17 Vp
43.7189 142.3623 35.0 0.0 7.19 Vp
42.3050 143.9054 35.0 0.0 7.23 Vp
42.3776 143.8324 35.0 0.0 7.23 Vp
42.4500 143.7592 35.0 0.3 7.23 Vp
42.5225 143.6858 35.0 7.7 7.23 Vp
42.5949 143.6123 35.0 199.1 7.52 Vp
42.6672 143.5386 35.0 726.8 7.39 Vp
42.7395 143.4647 35.0 1519.6 7.77 Vp
42.8118 143.3906 35.0 2207.8 8.18 Vp
42.8840 143.3164 35.0 1886.8 8.16 Vp
42.9561 143.2420 35.0 1272.7 7.79 Vp
43.0282 143.1674 35.0 1231.3 7.67 Vp
43.1003 143.0927 35.0 2317.9 7.67 Vp
43.1723 143.0177 35.0 666.9 6.81 Vp
43.2443 142.9426 35.0 239.0 6.76 Vp
43.3162 142.8673 35.0 57.9 6.74 Vp
43.3880 142.7919 35.0 51.8 6.94 Vp
43.4598 142.7162 35.0 17.9 7.09 Vp
43.5316 142.6404 35.0 25.7 6.99 Vp
43.6033 142.5644 35.0 0.2 7.23 Vp
43.6750 142.4882 35.0 0.0 7.23 Vp
43.7466 142.4119 35.0 0.0 7.23 Vp
42.3320 143.9545 35.0 0.0 7.23 Vp
42.4046 143.8815 35.0 0.0 7.23 Vp
42.4771 143.8083 35.0 0.0 7.23 Vp
42.5495 143.7350 35.0 3.5 7.23 Vp
42.6220 143.6615 35.0 185.1 7.55 Vp
42.6943 143.5878 35.0 750.4 7.64 Vp
42.7667 143.5139 35.0 1012.7 6.90 Vp
42.8389 143.4399 35.0 1575.0 7.21 Vp
42.9112 143.3657 35.0 1788.9 7.61 Vp
42.9834 143.2913 35.0 1112.1 8.00 Vp
43.0555 143.2167 35.0 1009.6 7.62 Vp
43.1276 143.1420 35.0 1468.8 7.20 Vp
43.1996 143.0671 35.0 425.1 6.77 Vp
43.2716 142.9920 35.0 321.8 6.97 Vp
43.3436 142.9167 35.0 179.8 6.73 Vp
43.4155 142.8413 35.0 24.2 6.93 Vp
43.4873 142.7657 35.0 9.2 7.23 Vp
43.5591 142.6899 35.0 2.1 7.23 Vp
43.6308 142.6139 35.0 0.0 7.23 Vp
43.7025 142.5378 35.0 0.0 7.23 Vp
43.7741 142.4614 35.0 0.0 7.23 Vp
42.3590 144.0036 35.0 0.0 7.23 Vp
42.4315 143.9306 35.0 0.0 7.23 Vp
42.5041 143.8575 35.0 0.0 7.23 Vp
42.5766 143.7842 35.0 0.7 7.23 Vp
42.6490 143.7107 35.0 172.9 7.56 Vp
42.7214 143.6370 35.0 961.4 7.34 Vp
42.7938 143.5632 35.0 1289.8 7.31 Vp
42.8661 143.4892 35.0 1641.4 7.91 Vp
42.9384 143.4150 35.0 1839.4 7.97 Vp
43.0106 143.3406 35.0 860.6 7.53 Vp
43.0828 143.2661 35.0 816.0 7.56 Vp
43.1549 143.1914 35.0 1261.2 7.71 Vp
43.2270 143.1165 35.0 718.7 7.62 Vp
43.2990 143.0414 35.0 253.6 7.19 Vp
43.3710 142.9662 35.0 121.0 6.75 Vp
43.4429 142.8908 35.0 13.5 7.23 Vp
43.5148 142.8152 35.0 2.4 7.23 Vp
43.5866 142.7394 35.0 0.6 7.23 Vp
43.6583 142.6635 35.0 0.0 7.26 Vp
43.7301 142.5873 35.0 0.0 7.26 Vp
43.8017 142.5110 35.0 0.0 7.26 Vp
42.3859 144.0527 35.0 0.0 7.23 Vp
42.4585 143.9798 35.0 0.0 7.23 Vp
42.5311 143.9067 35.0 0.0 7.23 Vp
42.6036 143.8334 35.0 0.1 7.23 Vp
42.6761 143.7599 35.0 134.0 7.82 Vp
42.7485 143.6863 35.0 1087.2 7.49 Vp
42.8209 143.6125 35.0 3055.4 7.77 Vp
42.8932 143.5385 35.0 2365.8 7.48 Vp
42.9655 143.4643 35.0 3262.4 8.04 Vp
43.0378 143.3900 35.0 2108.2 6.99 Vp
43.1100 143.3155 35.0 1163.9 7.27 Vp
43.1822 143.2408 35.0 1019.1 7.38 Vp
43.2543 143.1660 35.0 459.9 7.03 Vp
43.3263 143.0909 35.0 133.0 6.76 Vp
43.3983 143.0157 35.0 59.3 6.83 Vp
43.4703 142.9403 35.0 8.3 7.00 Vp
43.5422 142.8648 35.0 25.8 7.16 Vp
43.6140 142.7890 35.0 64.0 7.17 Vp
43.6858 142.7131 35.0 20.5 7.26 Vp
43.7576 142.6370 35.0 0.0 7.26 Vp
43.8293 142.5607 35.0 0.0 7.26 Vp
42.4397 144.1511 35.0 0.0 7.23 Vp
42.5124 144.0782 35.0 0.0 7.23 Vp
42.5850 144.0052 35.0 0.0 7.23 Vp
42.6576 143.9319 35.0 0.0 7.23 Vp
42.7301 143.8585 35.0 20.8 7.23 Vp
42.8026 143.7850 35.0 588.1 7.75 Vp
42.8751 143.7112 35.0 2243.5 7.43 Vp
42.9475 143.6373 35.0 2255.5 7.30 Vp
43.0198 143.5632 35.0 2336.8 7.53 Vp
43.0921 143.4889 35.0 3446.4 7.67 Vp
43.1644 143.4144 35.0 1920.4 7.45 Vp
43.2366 143.3398 35.0 939.2 7.00 Vp
43.3088 143.2650 35.0 742.4 7.17 Vp
43.3809 143.1900 35.0 530.1 7.15 Vp
43.4530 143.1149 35.0 214.4 6.90 Vp
43.5250 143.0395 35.0 109.0 7.02 Vp
43.5970 142.9640 35.0 78.4 6.91 Vp
43.6689 142.8883 35.0 77.2 6.95 Vp
43.7407 142.8124 35.0 23.2 7.26 Vp
43.8125 142.7364 35.0 0.0 7.26 Vp
43.8843 142.6601 35.0 0.0 7.26 Vp
42.4934 144.2497 35.0 0.0 7.26 Vp
42.5661 144.1768 35.0 0.0 7.26 Vp
42.6388 144.1039 35.0 0.0 7.26 Vp
42.7115 144.0307 35.0 0.0 7.26 Vp
42.7841 143.9573 35.0 0.0 7.26 Vp
42.8566 143.8838 35.0 336.9 7.49 Vp
42.9291 143.8101 35.0 1955.6 7.21 Vp
43.0016 143.7362 35.0 1322.9 7.38 Vp
43.0740 143.6622 35.0 509.1 6.67 Vp
43.1464 143.5880 35.0 1052.0 6.67 Vp
43.2187 143.5136 35.0 1004.4 7.01 Vp
43.2910 143.4390 35.0 418.8 6.75 Vp
43.3632 143.3642 35.0 306.0 7.18 Vp
43.4354 143.2893 35.0 285.1 6.92 Vp
43.5075 143.2142 35.0 138.3 6.89 Vp
43.5796 143.1389 35.0 144.7 7.22 Vp
43.6517 143.0634 35.0 98.5 6.83 Vp
43.7236 142.9878 35.0 14.6 7.26 Vp
43.7956 142.9120 35.0 9.2 7.26 Vp
43.8674 142.8360 35.0 0.0 7.26 Vp
43.9392 142.7598 35.0 0.0 7.26 Vp
42.5470 144.3484 35.0 0.0 7.26 Vp
42.6198 144.2756 35.0 0.0 7.26 Vp
42.6925 144.2027 35.0 0.0 7.26 Vp
42.7652 144.1296 35.0 0.0 7.26 Vp
42.8379 144.0563 35.0 0.0 7.26 Vp
42.9105 143.9828 35.0 130.7 7.50 Vp
42.9831 143.9092 35.0 1109.2 7.68 Vp
43.0556 143.8354 35.0 1245.7 7.58 Vp
43.1281 143.7614 35.0 953.8 7.03 Vp
43.2006 143.6872 35.0 1811.6 7.34 Vp
43.2730 143.6128 35.0 918.6 6.97 Vp
43.3453 143.5383 35.0 120.3 6.82 Vp
43.4176 143.4636 35.0 162.1 7.18 Vp
43.4898 143.3887 35.0 35.1 6.72 Vp
43.5620 143.3137 35.0 36.9 6.65 Vp
43.6342 143.2384 35.0 124.7 7.10 Vp
43.7063 143.1630 35.0 51.9 6.83 Vp
43.7783 143.0874 35.0 29.9 7.26 Vp
43.8503 143.0117 35.0 10.6 7.26 Vp
43.9222 142.9357 35.0 0.0 7.26 Vp
43.9941 142.8596 35.0 0.0 7.26 Vp
42.6005 144.4473 35.0 0.0 7.26 Vp
42.6734 144.3746 35.0 0.0 7.26 Vp
42.7462 144.3017 35.0 0.0 7.26 Vp
42.8190 144.2286 35.0 0.0 7.26 Vp
42.8917 144.1554 35.0 0.0 7.26 Vp
42.9644 144.0820 35.0 15.9 7.26 Vp
43.0370 144.0084 35.0 275.6 7.36 Vp
43.1096 143.9346 35.0 509.0 7.29 Vp
43.1821 143.8607 35.0 617.5 7.15 Vp
43.2546 143.7866 35.0 501.7 6.92 Vp
43.3271 143.7123 35.0 636.5 7.38 Vp
43.3995 143.6378 35.0 249.8 7.05 Vp
43.4719 143.5632 35.0 256.0 7.45 Vp
43.5442 143.4884 35.0 108.5 7.19 Vp
43.6164 143.4133 35.0 30.2 6.67 Vp
43.6886 143.3382 35.0 19.9 7.26 Vp
43.7608 143.2628 35.0 13.1 7.26 Vp
43.8329 143.1873 35.0 14.8 7.26 Vp
43.9049 143.1115 35.0 4.6 7.26 Vp
43.9769 143.0356 35.0 0.0 7.26 Vp
44.0489 142.9596 35.0 0.0 7.26 Vp
42.6539 144.5464 35.0 0.0 7.26 Vp
42.7269 144.4737 35.0 0.0 7.26 Vp
42.7997 144.4009 35.0 0.0 7.26 Vp
42.8726 144.3279 35.0 0.0 7.26 Vp
42.9454 144.2547 35.0 0.0 7.26 Vp
43.0181 144.1813 35.0 0.0 7.26 Vp
43.0908 144.1078 35.0 0.0 7.26 Vp
43.1635 144.0341 35.0 1.4 7.26 Vp
43.2361 143.9602 35.0 10.6 7.26 Vp
43.3086 143.8862 35.0 1.2 7.26 Vp
43.3811 143.8119 35.0 22.5 7.28 Vp
43.4536 143.7375 35.0 53.8 7.08 Vp
43.5260 143.6629 35.0 36.0 7.17 Vp
43.5984 143.5882 35.0 67.4 7.42 Vp
43.6707 143.5132 35.0 24.3 7.26 Vp
43.7430 143.4381 35.0 0.0 7.26 Vp
43.8152 143.3628 35.0 0.0 7.26 Vp
43.8874 143.2873 35.0 0.0 7.26 Vp
43.9595 143.2116 35.0 0.0 7.26 Vp
44.0315 143.1358 35.0 0.0 7.26 Vp
44.1035 143.0597 35.0 0.0 7.26 Vp
41.0133 141.6458 40.0 0.0 7.45 Vp
41.0844 141.5716 40.0 0.0 7.45 Vp
41.1554 141.4973 40.0 0.0 7.58 Vp
41.2264 141.4228 40.0 0.0 7.66 Vp
41.2974 141.3481 40.0 0.6 7.75 Vp
41.3683 141.2733 40.0 0.5 7.58 Vp
41.4392 141.1983 40.0 0.0 7.62 Vp
41.5100 141.1231 40.0 0.0 7.52 Vp
41.5807 141.0478 40.0 0.0 7.52 Vp
41.6515 140.9723 40.0 0.0 7.75 Vp
41.7221 140.8967 40.0 0.0 7.64 Vp
41.7928 140.8209 40.0 0.0 7.62 Vp
41.8633 140.7449 40.0 0.0 7.52 Vp
41.9338 140.6687 40.0 0.0 7.39 Vp
42.0043 140.5924 40.0 0.0 7.37 Vp
42.0747 140.5159 40.0 0.0 7.41 Vp
42.1451 140.4393 40.0 0.0 7.48 Vp
42.2154 140.3625 40.0 0.0 7.48 Vp
42.2856 140.2855 40.0 0.0 7.45 Vp
42.3558 140.2083 40.0 0.0 7.37 Vp
42.4260 140.1310 40.0 0.0 7.35 Vp
41.0691 141.7401 40.0 0.0 7.45 Vp
41.1403 141.6660 40.0 0.0 7.51 Vp
41.2114 141.5917 40.0 0.0 7.62 Vp
41.2825 141.5172 40.0 0.0 7.69 Vp
41.3535 141.4426 40.0 51.5 7.70 Vp
41.4245 141.3678 40.0 193.4 7.56 Vp
41.4954 141.2929 40.0 67.2 7.63 Vp
41.5663 141.2177 40.0 3.5 7.54 Vp
41.6371 141.1425 40.0 3.7 7.56 Vp
41.7079 141.0670 40.0 4.9 7.50 Vp
41.7786 140.9914 40.0 2.8 7.61 Vp
41.8493 140.9156 40.0 0.8 7.51 Vp
41.9199 140.8397 40.0 0.0 7.54 Vp
41.9905 140.7635 40.0 0.0 7.39 Vp
42.0610 140.6873 40.0 0.0 7.57 Vp
42.1315 140.6108 40.0 0.0 7.73 Vp
42.2019 140.5342 40.0 0.0 7.73 Vp
42.2723 140.4574 40.0 0.0 7.58 Vp
42.3426 140.3804 40.0 0.0 7.37 Vp
42.4129 140.3033 40.0 0.0 7.40 Vp
42.4831 140.2260 40.0 0.0 7.29 Vp
41.1249 141.8346 40.0 0.0 7.45 Vp
41.1961 141.7605 40.0 0.0 7.53 Vp
41.2673 141.6862 40.0 0.0 7.68 Vp
41.3384 141.6118 40.0 0.0 7.70 Vp
41.4095 141.5373 40.0 30.5 7.54 Vp
41.4805 141.4625 40.0 151.6 7.54 Vp
41.5515 141.3876 40.0 205.2 7.65 Vp
41.6225 141.3125 40.0 66.0 7.54 Vp
41.6934 141.2373 40.0 47.0 7.47 Vp
41.7642 141.1618 40.0 220.0 7.47 Vp
41.8350 141.0863 40.0 138.5 7.48 Vp
41.9058 141.0105 40.0 62.2 7.54 Vp
41.9765 140.9346 40.0 5.8 7.47 Vp
42.0471 140.8585 40.0 1.2 7.75 Vp
42.1177 140.7823 40.0 0.1 7.88 Vp
42.1882 140.7059 40.0 0.0 7.85 Vp
42.2587 140.6293 40.0 0.0 7.90 Vp
42.3292 140.5525 40.0 0.0 7.66 Vp
42.3996 140.4756 40.0 0.0 7.64 Vp
42.4699 140.3985 40.0 0.0 7.40 Vp
42.5402 140.3212 40.0 0.0 7.29 Vp
41.1806 141.9293 40.0 0.0 7.45 Vp
41.2519 141.8552 40.0 0.0 7.48 Vp
41.3231 141.7810 40.0 0.0 7.65 Vp
41.3943 141.7066 40.0 2.0 7.32 Vp
41.4654 141.6321 40.0 60.9 7.26 Vp
41.5365 141.5574 40.0 46.0 7.42 Vp
41.6076 141.4825 40.0 151.9 7.73 Vp
41.6786 141.4075 40.0 186.9 7.70 Vp
41.7496 141.3323 40.0 95.8 8.17 Vp
41.8205 141.2569 40.0 367.3 7.99 Vp
41.8913 141.1813 40.0 369.0 7.63 Vp
41.9621 141.1056 40.0 243.3 7.45 Vp
42.0329 141.0298 40.0 236.6 7.72 Vp
42.1036 140.9537 40.0 7.1 7.74 Vp
42.1743 140.8775 40.0 1.6 7.85 Vp
42.2449 140.8011 40.0 0.9 7.86 Vp
42.3154 140.7245 40.0 0.0 7.84 Vp
42.3859 140.6478 40.0 0.0 7.66 Vp
42.4564 140.5709 40.0 0.0 7.53 Vp
42.5268 140.4939 40.0 0.0 7.38 Vp
42.5971 140.4166 40.0 0.0 7.36 Vp
41.2362 142.0241 40.0 0.0 7.45 Vp
41.3075 141.9501 40.0 0.0 7.43 Vp
41.3788 141.8759 40.0 0.0 7.50 Vp
41.4501 141.8016 40.0 12.0 7.26 Vp
41.5213 141.7271 40.0 99.7 7.16 Vp
41.5925 141.6524 40.0 150.0 7.36 Vp
41.6636 141.5776 40.0 275.6 7.87 Vp
41.7347 141.5026 40.0 470.8 8.17 Vp
41.8057 141.4274 40.0 227.7 8.04 Vp
41.8767 141.3521 40.0 227.7 8.05 Vp
41.9476 141.2766 40.0 274.1 7.81 Vp
42.0185 141.2009 40.0 422.7 7.67 Vp
42.0893 141.1250 40.0 379.4 7.57 Vp
42.1601 141.0490 40.0 29.8 7.62 Vp
42.2308 140.9729 40.0 4.1 7.73 Vp
42.3015 140.8965 40.0 0.5 7.84 Vp
42.3721 140.8200 40.0 0.0 7.76 Vp
42.4426 140.7433 40.0 0.0 7.56 Vp
42.5132 140.6664 40.0 0.0 7.48 Vp
42.5836 140.5894 40.0 0.0 7.39 Vp
42.6540 140.5122 40.0 0.0 7.48 Vp
41.2917 142.1191 40.0 0.0 7.48 Vp
41.3631 142.0452 40.0 0.0 7.37 Vp
41.4345 141.9710 40.0 0.0 7.23 Vp
41.5058 141.8967 40.0 3.7 7.19 Vp
41.5771 141.8223 40.0 17.0 7.16 Vp
41.6483 141.7476 40.0 264.3 7.40 Vp
41.7195 141.6728 40.0 182.4 7.80 Vp
41.7906 141.5979 40.0 114.2 7.76 Vp
41.8617 141.5227 40.0 133.8 7.76 Vp
41.9328 141.4474 40.0 208.4 7.78 Vp
42.0038 141.3720 40.0 596.6 7.71 Vp
42.0747 141.2963 40.0 1541.5 7.70 Vp
42.1456 141.2205 40.0 633.4 7.43 Vp
42.2164 141.1445 40.0 229.3 7.47 Vp
42.2872 141.0684 40.0 144.4 7.62 Vp
42.3580 140.9921 40.0 59.6 7.71 Vp
42.4286 140.9156 40.0 9.3 7.57 Vp
42.4993 140.8390 40.0 0.0 7.55 Vp
42.5699 140.7621 40.0 0.0 7.54 Vp
42.6404 140.6851 40.0 0.0 7.50 Vp
42.7108 140.6080 40.0 0.0 7.64 Vp
41.3472 142.2143 40.0 0.0 7.48 Vp
41.4186 142.1404 40.0 0.0 7.34 Vp
41.4901 142.0663 40.0 0.0 7.25 Vp
41.5615 141.9920 40.0 1.0 7.15 Vp
41.6328 141.9176 40.0 59.6 7.29 Vp
41.7041 141.8430 40.0 197.9 7.49 Vp
41.7753 141.7682 40.0 51.3 7.75 Vp
41.8465 141.6933 40.0 296.7 7.76 Vp
41.9177 141.6182 40.0 507.4 7.62 Vp
41.9888 141.5430 40.0 506.7 7.60 Vp
42.0599 141.4675 40.0 1414.6 7.52 Vp
42.1309 141.3919 40.0 1602.8 7.58 Vp
42.2018 141.3162 40.0 495.3 7.52 Vp
42.2727 141.2402 40.0 287.4 7.37 Vp
42.3436 141.1641 40.0 343.0 7.53 Vp
42.4144 141.0878 40.0 375.6 7.70 Vp
42.4851 141.0114 40.0 174.5 7.61 Vp
42.5558 140.9348 40.0 7.2 7.60 Vp
42.6265 140.8580 40.0 0.5 7.67 Vp
42.6971 140.7810 40.0 0.0 7.66 Vp
42.7676 140.7039 40.0 0.0 7.70 Vp
41.4025 142.3096 40.0 0.0 7.42 Vp
41.4741 142.2357 40.0 0.0 7.26 Vp
41.5456 142.1617 40.0 0.0 7.34 Vp
41.6170 142.0875 40.0 1.8 7.25 Vp
41.6884 142.0131 40.0 245.4 7.47 Vp
41.7598 141.9386 40.0 462.2 7.64 Vp
41.8311 141.8638 40.0 184.5 7.66 Vp
41.9024 141.7890 40.0 865.7 7.65 Vp
41.9736 141.7139 40.0 965.2 7.49 Vp
42.0448 141.6387 40.0 612.1 7.57 Vp
42.1159 141.5633 40.0 472.3 7.50 Vp
42.1869 141.4877 40.0 318.7 7.60 Vp
42.2580 141.4120 40.0 268.3 7.57 Vp
42.3289 141.3361 40.0 196.4 7.37 Vp
42.3999 141.2600 40.0 242.3 7.47 Vp
42.4707 141.1838 40.0 437.4 7.60 Vp
42.5415 141.1074 40.0 319.1 7.45 Vp
42.6123 141.0308 40.0 142.8 7.60 Vp
42.6830 140.9540 40.0 63.5 7.74 Vp
42.7537 140.8771 40.0 3.4 7.72 Vp
42.8243 140.8000 40.0 0.0 7.62 Vp
41.4579 142.4051 40.0 0.0 7.45 Vp
41.5295 142.3313 40.0 0.0 7.56 Vp
41.6010 142.2573 40.0 0.0 7.52 Vp
41.6725 142.1831 40.0 15.4 7.45 Vp
41.7440 142.1088 40.0 483.3 7.62 Vp
41.8154 142.0343 40.0 519.8 7.65 Vp
41.8868 141.9596 40.0 515.1 7.68 Vp
41.9581 141.8848 40.0 1438.6 7.61 Vp
42.0294 141.8097 40.0 1577.7 7.46 Vp
42.1006 141.7346 40.0 902.3 7.54 Vp
42.1718 141.6592 40.0 812.7 7.61 Vp
42.2430 141.5837 40.0 803.0 7.64 Vp
42.3140 141.5080 40.0 434.9 7.59 Vp
42.3851 141.4321 40.0 329.2 7.46 Vp
42.4561 141.3561 40.0 387.2 7.43 Vp
42.5270 141.2799 40.0 486.8 7.44 Vp
42.5979 141.2035 40.0 242.4 7.38 Vp
42.6687 141.1270 40.0 202.6 7.63 Vp
42.7395 141.0503 40.0 155.1 7.71 Vp
42.8102 140.9734 40.0 30.9 7.62 Vp
42.8808 140.8963 40.0 0.0 7.53 Vp
41.5131 142.5008 40.0 0.0 7.55 Vp
41.5847 142.4270 40.0 0.0 7.67 Vp
41.6564 142.3530 40.0 0.5 7.71 Vp
41.7279 142.2789 40.0 40.4 7.65 Vp
41.7995 142.2046 40.0 573.2 7.77 Vp
41.8710 142.1302 40.0 590.2 7.68 Vp
41.9424 142.0555 40.0 888.1 7.70 Vp
42.0138 141.9807 40.0 1769.5 7.68 Vp
42.0851 141.9058 40.0 1436.3 7.57 Vp
42.1564 141.8306 40.0 687.0 7.51 Vp
42.2277 141.7553 40.0 1157.1 7.48 Vp
42.2989 141.6798 40.0 1295.3 7.58 Vp
42.3700 141.6042 40.0 878.1 7.52 Vp
42.4411 141.5284 40.0 667.7 7.56 Vp
42.5122 141.4524 40.0 648.2 7.49 Vp
42.5832 141.3762 40.0 626.2 7.57 Vp
42.6541 141.2999 40.0 143.1 7.42 Vp
42.7250 141.2234 40.0 152.9 7.60 Vp
42.7958 141.1467 40.0 80.2 7.65 Vp
42.8666 141.0698 40.0 11.6 7.53 Vp
42.9374 140.9928 40.0 0.0 7.60 Vp
41.5682 142.5966 40.0 0.0 7.45 Vp
41.6400 142.5229 40.0 0.0 7.75 Vp
41.7116 142.4490 40.0 7.7 7.85 Vp
41.7833 142.3749 40.0 88.6 7.82 Vp
41.8549 142.3006 40.0 707.6 7.99 Vp
41.9264 142.2262 40.0 1099.8 8.15 Vp
41.9979 142.1516 40.0 1057.3 7.76 Vp
42.0694 142.0769 40.0 1247.6 7.68 Vp
42.1408 142.0019 40.0 845.0 7.64 Vp
42.2122 141.9268 40.0 772.7 7.52 Vp
42.2835 141.8516 40.0 1205.6 7.57 Vp
42.3547 141.7761 40.0 1547.9 7.50 Vp
42.4259 141.7005 40.0 1747.2 7.62 Vp
42.4971 141.6247 40.0 933.1 7.58 Vp
42.5682 141.5488 40.0 793.2 7.61 Vp
42.6393 141.4727 40.0 554.6 7.61 Vp
42.7103 141.3964 40.0 211.2 7.50 Vp
42.7812 141.3199 40.0 68.2 7.49 Vp
42.8521 141.2433 40.0 37.3 7.57 Vp
42.9230 141.1664 40.0 9.3 7.49 Vp
42.9938 141.0895 40.0 0.0 7.58 Vp
41.6233 142.6926 40.0 0.0 7.45 Vp
41.6951 142.6189 40.0 0.0 7.73 Vp
41.7668 142.5451 40.0 109.7 7.86 Vp
41.8385 142.4710 40.0 289.9 7.99 Vp
41.9102 142.3968 40.0 958.9 8.23 Vp
41.9818 142.3224 40.0 2119.4 7.69 Vp
42.0534 142.2479 40.0 1091.9 7.76 Vp
42.1249 142.1732 40.0 1000.7 7.64 Vp
42.1964 142.0983 40.0 941.0 7.57 Vp
42.2678 142.0232 40.0 917.8 7.51 Vp
42.3392 141.9480 40.0 1036.7 7.55 Vp
42.4105 141.8726 40.0 2024.5 7.65 Vp
42.4818 141.7971 40.0 1487.3 7.59 Vp
42.5530 141.7213 40.0 1322.4 7.72 Vp
42.6242 141.6454 40.0 689.8 7.74 Vp
42.6953 141.5693 40.0 492.3 7.87 Vp
42.7664 141.4931 40.0 545.8 7.80 Vp
42.8374 141.4166 40.0 167.8 7.49 Vp
42.9084 141.3400 40.0 32.7 7.48 Vp
42.9793 141.2632 40.0 1.4 7.49 Vp
43.0501 141.1863 40.0 0.0 7.50 Vp
41.6783 142.7888 40.0 0.0 7.45 Vp
41.7501 142.7151 40.0 0.2 7.70 Vp
41.8220 142.6413 40.0 206.3 7.74 Vp
41.8937 142.5673 40.0 476.5 7.16 Vp
41.9654 142.4932 40.0 944.0 7.76 Vp
42.0371 142.4188 40.0 2393.5 7.71 Vp
42.1088 142.3443 40.0 1676.4 7.44 Vp
42.1803 142.2697 40.0 2281.8 8.05 Vp
42.2519 142.1948 40.0 1427.3 7.50 Vp
42.3234 142.1198 40.0 758.4 7.17 Vp
42.3948 142.0446 40.0 575.9 6.60 Vp
42.4662 141.9693 40.0 990.3 6.52 Vp
42.5375 141.8937 40.0 1165.8 7.54 Vp
42.6088 141.8181 40.0 1146.8 7.68 Vp
42.6801 141.7422 40.0 577.7 7.02 Vp
42.7513 141.6661 40.0 1060.5 8.77 Vp
42.8224 141.5899 40.0 1198.7 8.16 Vp
42.8935 141.5135 40.0 212.5 7.52 Vp
42.9645 141.4370 40.0 42.0 6.95 Vp
43.0355 141.3602 40.0 0.0 7.59 Vp
43.1064 141.2833 40.0 0.0 7.49 Vp
41.7332 142.8852 40.0 0.0 7.57 Vp
41.8051 142.8115 40.0 3.9 7.79 Vp
41.8770 142.7378 40.0 127.7 7.57 Vp
41.9488 142.6638 40.0 581.9 6.69 Vp
42.0206 142.5897 40.0 1033.5 6.67 Vp
42.0924 142.5154 40.0 1506.9 6.67 Vp
42.1640 142.4409 40.0 2157.4 7.57 Vp
42.2357 142.3663 40.0 4182.9 7.73 Vp
42.3073 142.2915 40.0 3128.5 8.10 Vp
42.3788 142.2166 40.0 1328.4 7.51 Vp
42.4504 142.1414 40.0 483.1 6.99 Vp
42.5218 142.0661 40.0 364.8 6.55 Vp
42.5932 141.9906 40.0 503.1 6.82 Vp
42.6646 141.9149 40.0 1105.1 7.61 Vp
42.7359 141.8391 40.0 847.6 7.95 Vp
42.8071 141.7631 40.0 824.5 7.96 Vp
42.8783 141.6870 40.0 680.7 8.08 Vp
42.9495 141.6106 40.0 152.7 7.89 Vp
43.0206 141.5341 40.0 29.2 7.67 Vp
43.0916 141.4574 40.0 0.0 7.64 Vp
43.1626 141.3805 40.0 0.0 7.54 Vp
41.7606 142.9334 40.0 0.0 7.61 Vp
41.8326 142.8598 40.0 23.0 7.79 Vp
41.9045 142.7860 40.0 246.9 7.65 Vp
41.9763 142.7121 40.0 468.4 6.59 Vp
42.0482 142.6380 40.0 1335.2 7.08 Vp
42.1199 142.5638 40.0 1933.1 6.82 Vp
42.1917 142.4893 40.0 1836.7 6.84 Vp
42.2633 142.4147 40.0 2453.9 6.81 Vp
42.3350 142.3399 40.0 2755.7 7.63 Vp
42.4066 142.2650 40.0 1649.6 7.88 Vp
42.4781 142.1899 40.0 1288.5 7.95 Vp
42.5496 142.1146 40.0 710.4 7.03 Vp
42.6210 142.0391 40.0 675.7 6.99 Vp
42.6924 141.9635 40.0 585.3 7.11 Vp
42.7637 141.8877 40.0 618.4 8.09 Vp
42.8350 141.8117 40.0 534.6 7.98 Vp
42.9063 141.7355 40.0 166.3 7.72 Vp
42.9774 141.6592 40.0 70.7 7.96 Vp
43.0486 141.5827 40.0 12.8 7.50 Vp
43.1196 141.5060 40.0 0.0 7.53 Vp
43.1906 141.4292 40.0 0.0 7.51 Vp
41.7880 142.9817 40.0 0.0 7.61 Vp
41.8600 142.9081 40.0 23.2 7.81 Vp
41.9320 142.8344 40.0 145.5 7.42 Vp
42.0038 142.7605 40.0 566.0 6.72 Vp
42.0757 142.6864 40.0 1745.7 6.80 Vp
42.1475 142.6121 40.0 2073.5 6.53 Vp
42.2193 142.5377 40.0 1529.4 6.70 Vp
42.2910 142.4632 40.0 1829.1 7.03 Vp
42.3626 142.3884 40.0 2228.5 7.62 Vp
42.4342 142.3135 40.0 1490.5 7.69 Vp
42.5058 142.2384 40.0 2162.0 7.98 Vp
42.5773 142.1631 40.0 1583.8 7.52 Vp
42.6488 142.0877 40.0 903.0 7.78 Vp
42.7202 142.0121 40.0 805.9 7.30 Vp
42.7916 141.9363 40.0 423.7 7.68 Vp
42.8629 141.8603 40.0 433.9 7.89 Vp
42.9342 141.7842 40.0 176.5 7.99 Vp
43.0054 141.7079 40.0 142.5 8.08 Vp
43.0765 141.6314 40.0 8.6 7.52 Vp
43.1476 141.5547 40.0 0.0 7.52 Vp
43.2187 141.4779 40.0 0.0 7.51 Vp
41.8154 143.0300 40.0 0.0 7.67 Vp
41.8874 142.9564 40.0 6.4 7.53 Vp
41.9594 142.8827 40.0 86.0 7.37 Vp
42.0313 142.8088 40.0 877.5 6.66 Vp
42.1032 142.7348 40.0 2295.4 6.82 Vp
42.1750 142.6606 40.0 1930.8 6.65 Vp
42.2468 142.5862 40.0 1224.7 5.97 Vp
42.3186 142.5116 40.0 1715.2 6.80 Vp
42.3903 142.4369 40.0 3637.7 7.85 Vp
42.4619 142.3620 40.0 3363.6 8.70 Vp
42.5335 142.2869 40.0 2062.5 7.70 Vp
42.6051 142.2117 40.0 1162.2 6.89 Vp
42.6766 142.1362 40.0 1289.9 7.92 Vp
42.7480 142.0607 40.0 1088.6 7.72 Vp
42.8194 141.9849 40.0 438.3 7.33 Vp
42.8908 141.9090 40.0 366.0 7.75 Vp
42.9621 141.8328 40.0 555.3 8.52 Vp
43.0333 141.7565 40.0 165.8 7.54 Vp
43.1045 141.6801 40.0 27.0 7.27 Vp
43.1756 141.6035 40.0 0.0 7.27 Vp
43.2467 141.5266 40.0 0.0 7.33 Vp
41.8428 143.0783 40.0 0.0 7.48 Vp
41.9148 143.0048 40.0 16.7 7.51 Vp
41.9868 142.9311 40.0 180.0 7.12 Vp
42.0588 142.8573 40.0 1054.1 7.21 Vp
42.1307 142.7832 40.0 2718.4 6.66 Vp
42.2026 142.7090 40.0 2629.9 6.53 Vp
42.2744 142.6347 40.0 1255.1 6.07 Vp
42.3462 142.5602 40.0 1681.4 6.86 Vp
42.4179 142.4854 40.0 2599.6 7.24 Vp
42.4896 142.4106 40.0 2290.2 7.92 Vp
42.5612 142.3355 40.0 1084.4 7.41 Vp
42.6328 142.2603 40.0 687.3 6.89 Vp
42.7043 142.1849 40.0 990.1 7.66 Vp
42.7758 142.1093 40.0 1302.6 8.09 Vp
42.8472 142.0336 40.0 1281.0 7.92 Vp
42.9186 141.9576 40.0 661.8 7.72 Vp
42.9899 141.8816 40.0 677.6 8.34 Vp
43.0612 141.8053 40.0 164.2 7.38 Vp
43.1324 141.7289 40.0 22.2 7.37 Vp
43.2036 141.6522 40.0 0.0 7.28 Vp
43.2747 141.5754 40.0 0.0 7.35 Vp
41.8701 143.1267 40.0 0.0 7.51 Vp
41.9422 143.0532 40.0 20.0 7.22 Vp
42.0142 142.9796 40.0 222.9 7.06 Vp
42.0862 142.9057 40.0 982.1 6.79 Vp
42.1582 142.8317 40.0 2094.8 6.40 Vp
42.2301 142.7576 40.0 2956.9 6.50 Vp
42.3019 142.6832 40.0 2029.2 6.57 Vp
42.3737 142.6087 40.0 1243.7 6.39 Vp
42.4455 142.5340 40.0 1760.3 7.29 Vp
42.5172 142.4592 40.0 1793.4 7.59 Vp
42.5889 142.3841 40.0 919.4 7.47 Vp
42.6605 142.3089 40.0 754.7 7.02 Vp
42.7320 142.2336 40.0 434.7 7.18 Vp
42.8036 142.1580 40.0 897.5 8.03 Vp
42.8750 142.0823 40.0 1031.2 7.78 Vp
42.9464 142.0064 40.0 344.5 7.29 Vp
43.0178 141.9303 40.0 263.2 7.90 Vp
43.0891 141.8541 40.0 179.3 7.75 Vp
43.1603 141.7776 40.0 22.6 7.29 Vp
43.2315 141.7011 40.0 0.0 7.08 Vp
43.3027 141.6243 40.0 0.0 7.18 Vp
41.8975 143.1752 40.0 0.0 7.40 Vp
41.9696 143.1017 40.0 3.5 7.16 Vp
42.0416 143.0280 40.0 101.4 7.09 Vp
42.1136 142.9543 40.0 630.8 6.72 Vp
42.1856 142.8803 40.0 1765.2 6.94 Vp
42.2576 142.8061 40.0 3262.9 6.39 Vp
42.3294 142.7318 40.0 2470.2 6.07 Vp
42.4013 142.6573 40.0 1209.8 6.26 Vp
42.4731 142.5826 40.0 1605.8 6.73 Vp
42.5448 142.5078 40.0 2636.9 7.80 Vp
42.6165 142.4328 40.0 3143.9 8.11 Vp
42.6881 142.3576 40.0 1444.6 7.44 Vp
42.7597 142.2823 40.0 299.5 6.78 Vp
42.8313 142.2068 40.0 577.4 7.82 Vp
42.9028 142.1310 40.0 436.4 7.66 Vp
42.9742 142.0552 40.0 106.1 7.15 Vp
43.0456 141.9791 40.0 159.6 7.67 Vp
43.1170 141.9029 40.0 315.6 8.14 Vp
43.1882 141.8265 40.0 65.4 7.39 Vp
43.2595 141.7499 40.0 0.0 7.10 Vp
43.3307 141.6732 40.0 0.0 7.21 Vp
41.9248 143.2236 40.0 0.0 7.36 Vp
41.9969 143.1502 40.0 11.6 7.32 Vp
42.0690 143.0766 40.0 154.8 7.10 Vp
42.1410 143.0028 40.0 1111.6 7.23 Vp
42.2131 142.9288 40.0 1953.9 7.10 Vp
42.2850 142.8547 40.0 3092.9 6.62 Vp
42.3569 142.7804 40.0 2421.0 6.19 Vp
42.4288 142.7060 40.0 1462.6 6.40 Vp
42.5006 142.6313 40.0 1461.1 6.71 Vp
42.5724 142.5565 40.0 1661.6 6.91 Vp
42.6441 142.4815 40.0 2216.2 7.75 Vp
42.7158 142.4064 40.0 1115.2 7.26 Vp
42.7874 142.3310 40.0 691.3 7.41 Vp
42.8590 142.2555 40.0 516.5 7.40 Vp
42.9305 142.1799 40.0 160.1 7.07 Vp
43.0020 142.1040 40.0 112.3 7.45 Vp
43.0734 142.0280 40.0 115.7 7.24 Vp
43.1448 141.9518 40.0 81.3 7.44 Vp
43.2161 141.8754 40.0 35.2 7.33 Vp
43.2874 141.7988 40.0 0.0 7.09 Vp
43.3586 141.7221 40.0 0.0 7.18 Vp
41.9520 143.2722 40.0 0.0 7.40 Vp
42.0242 143.1987 40.0 61.9 7.15 Vp
42.0963 143.1251 40.0 300.3 7.03 Vp
42.1684 143.0514 40.0 1129.4 6.47 Vp
42.2405 142.9775 40.0 2142.1 6.64 Vp
42.3125 142.9034 40.0 4264.8 6.81 Vp
42.3844 142.8291 40.0 3319.1 7.02 Vp
42.4563 142.7546 40.0 1978.3 6.75 Vp
42.5282 142.6800 40.0 660.3 6.13 Vp
42.6000 142.6052 40.0 622.0 6.82 Vp
42.6717 142.5303 40.0 1420.7 7.43 Vp
42.7434 142.4552 40.0 785.1 6.79 Vp
42.8151 142.3798 40.0 1545.4 7.77 Vp
42.8867 142.3044 40.0 896.9 7.69 Vp
42.9583 142.2287 40.0 198.5 7.03 Vp
43.0298 142.1529 40.0 170.3 7.25 Vp
43.1012 142.0769 40.0 110.9 7.20 Vp
43.1726 142.0007 40.0 46.2 7.29 Vp
43.2440 141.9243 40.0 33.5 7.35 Vp
43.3153 141.8478 40.0 0.0 7.11 Vp
43.3865 141.7711 40.0 0.0 7.21 Vp
41.9793 143.3207 40.0 0.0 7.40 Vp
42.0515 143.2473 40.0 11.8 7.11 Vp
42.1237 143.1738 40.0 289.5 7.28 Vp
42.1958 143.1000 40.0 910.9 6.71 Vp
42.2679 143.0261 40.0 2404.6 6.92 Vp
42.3399 142.9521 40.0 3533.0 6.73 Vp
42.4119 142.8778 40.0 2294.6 6.48 Vp
42.4838 142.8034 40.0 1528.0 6.59 Vp
42.5557 142.7288 40.0 752.0 6.56 Vp
42.6275 142.6540 40.0 571.9 6.50 Vp
42.6993 142.5791 40.0 802.1 6.46 Vp
42.7710 142.5040 40.0 684.2 6.52 Vp
42.8427 142.4287 40.0 777.6 7.31 Vp
42.9144 142.3532 40.0 1250.6 8.24 Vp
42.9860 142.2776 40.0 197.7 7.15 Vp
43.0575 142.2018 40.0 178.6 7.31 Vp
43.1290 142.1258 40.0 116.6 7.11 Vp
43.2004 142.0497 40.0 90.4 7.19 Vp
43.2718 141.9733 40.0 66.5 7.55 Vp
43.3431 141.8968 40.0 0.0 7.22 Vp
43.4144 141.8201 40.0 0.0 7.37 Vp
42.0065 143.3693 40.0 0.0 7.34 Vp
42.0788 143.2959 40.0 62.2 7.03 Vp
42.1510 143.2224 40.0 536.9 7.09 Vp
42.2231 143.1487 40.0 932.4 6.57 Vp
42.2952 143.0748 40.0 2072.0 6.73 Vp
42.3673 143.0008 40.0 2609.1 6.37 Vp
42.4393 142.9265 40.0 2024.0 6.33 Vp
42.5113 142.8522 40.0 1639.2 6.71 Vp
42.5832 142.7776 40.0 1815.7 7.28 Vp
42.6550 142.7029 40.0 966.5 6.98 Vp
42.7269 142.6279 40.0 720.9 7.05 Vp
42.7986 142.5528 40.0 1229.5 7.25 Vp
42.8704 142.4776 40.0 785.7 7.46 Vp
42.9420 142.4021 40.0 746.9 7.24 Vp
43.0136 142.3265 40.0 304.7 7.35 Vp
43.0852 142.2507 40.0 182.9 7.37 Vp
43.1567 142.1748 40.0 136.0 7.03 Vp
43.2282 142.0987 40.0 49.0 7.07 Vp
43.2996 142.0223 40.0 18.2 7.16 Vp
43.3710 141.9458 40.0 0.0 7.28 Vp
43.4423 141.8692 40.0 0.0 7.40 Vp
42.0338 143.4180 40.0 0.0 7.23 Vp
42.1060 143.3446 40.0 94.2 7.45 Vp
42.1783 143.2711 40.0 449.7 7.29 Vp
42.2504 143.1974 40.0 571.6 6.74 Vp
42.3226 143.1236 40.0 949.7 6.18 Vp
42.3947 143.0495 40.0 1109.3 5.93 Vp
42.4667 142.9753 40.0 1702.1 6.30 Vp
42.5387 142.9010 40.0 1364.2 6.67 Vp
42.6106 142.8264 40.0 2187.4 7.16 Vp
42.6825 142.7517 40.0 1151.6 6.89 Vp
42.7544 142.6768 40.0 504.1 6.50 Vp
42.8262 142.6018 40.0 862.6 7.25 Vp
42.8980 142.5265 40.0 911.2 7.67 Vp
42.9697 142.4511 40.0 259.1 6.78 Vp
43.0413 142.3755 40.0 231.7 7.30 Vp
43.1129 142.2998 40.0 124.6 7.28 Vp
43.1845 142.2238 40.0 95.1 7.07 Vp
43.2560 142.1477 40.0 23.3 7.12 Vp
43.3274 142.0714 40.0 1.8 7.25 Vp
43.3988 141.9949 40.0 0.0 7.37 Vp
43.4701 141.9183 40.0 0.0 7.47 Vp
42.0610 143.4666 40.0 0.0 7.45 Vp
42.1333 143.3933 40.0 24.1 7.45 Vp
42.2055 143.3198 40.0 232.4 7.16 Vp
42.2777 143.2462 40.0 370.4 6.66 Vp
42.3499 143.1723 40.0 740.4 6.56 Vp
42.4220 143.0984 40.0 1728.2 6.69 Vp
42.4941 143.0242 40.0 2319.8 7.19 Vp
42.5661 142.9498 40.0 2165.6 7.89 Vp
42.6381 142.8753 40.0 2774.0 8.24 Vp
42.7100 142.8006 40.0 1143.0 6.90 Vp
42.7819 142.7258 40.0 441.4 6.62 Vp
42.8537 142.6507 40.0 819.1 7.12 Vp
42.9255 142.5755 40.0 874.2 8.13 Vp
42.9973 142.5001 40.0 927.2 8.17 Vp
43.0690 142.4245 40.0 397.1 8.01 Vp
43.1406 142.3488 40.0 126.1 7.60 Vp
43.2122 142.2729 40.0 90.9 7.44 Vp
43.2837 142.1968 40.0 108.1 7.34 Vp
43.3552 142.1205 40.0 9.5 7.28 Vp
43.4266 142.0441 40.0 0.0 7.40 Vp
43.4980 141.9675 40.0 0.0 7.53 Vp
42.0882 143.5154 40.0 0.0 7.45 Vp
42.1605 143.4421 40.0 2.1 7.45 Vp
42.2328 143.3686 40.0 118.2 7.38 Vp
42.3050 143.2950 40.0 352.2 7.41 Vp
42.3772 143.2212 40.0 799.9 7.33 Vp
42.4494 143.1472 40.0 1765.2 7.24 Vp
42.5215 143.0731 40.0 3212.9 8.07 Vp
42.5935 142.9987 40.0 4550.5 8.42 Vp
42.6655 142.9242 40.0 3810.5 8.27 Vp
42.7375 142.8496 40.0 3333.2 8.87 Vp
42.8094 142.7747 40.0 1805.8 8.03 Vp
42.8813 142.6997 40.0 324.6 6.84 Vp
42.9531 142.6245 40.0 169.3 6.69 Vp
43.0249 142.5491 40.0 567.4 7.56 Vp
43.0966 142.4736 40.0 495.4 7.58 Vp
43.1682 142.3979 40.0 122.5 7.46 Vp
43.2399 142.3220 40.0 102.9 7.28 Vp
43.3114 142.2459 40.0 115.1 7.48 Vp
43.3829 142.1697 40.0 19.1 7.28 Vp
43.4544 142.0933 40.0 0.0 7.45 Vp
43.5258 142.0167 40.0 0.0 7.35 Vp
42.1153 143.5641 40.0 0.0 7.45 Vp
42.1877 143.4909 40.0 0.0 7.45 Vp
42.2600 143.4174 40.0 43.7 7.35 Vp
42.3323 143.3438 40.0 350.7 7.80 Vp
42.4045 143.2701 40.0 606.3 7.31 Vp
42.4767 143.1961 40.0 2052.1 7.76 Vp
42.5488 143.1220 40.0 2908.6 7.43 Vp
42.6209 143.0477 40.0 3983.4 7.89 Vp
42.6929 142.9732 40.0 2726.1 7.92 Vp
42.7649 142.8986 40.0 2231.0 7.56 Vp
42.8369 142.8237 40.0 1206.5 6.88 Vp
42.9088 142.7487 40.0 145.0 7.07 Vp
42.9806 142.6736 40.0 58.8 6.79 Vp
43.0524 142.5983 40.0 479.5 7.77 Vp
43.1242 142.5227 40.0 443.4 7.86 Vp
43.1959 142.4470 40.0 110.8 7.40 Vp
43.2675 142.3712 40.0 115.3 7.62 Vp
43.3391 142.2951 40.0 88.3 7.54 Vp
43.4106 142.2189 40.0 2.5 7.33 Vp
43.4821 142.1425 40.0 0.0 7.53 Vp
43.5536 142.0659 40.0 0.0 7.40 Vp
42.1425 143.6129 40.0 0.0 7.45 Vp
42.2148 143.5397 40.0 0.0 7.45 Vp
42.2872 143.4663 40.0 29.2 7.45 Vp
42.3595 143.3927 40.0 765.0 8.85 Vp
42.4318 143.3190 40.0 1461.7 7.97 Vp
42.5040 143.2450 40.0 3024.9 7.64 Vp
42.5761 143.1709 40.0 3651.2 7.82 Vp
42.6483 143.0967 40.0 2712.4 8.09 Vp
42.7203 143.0222 40.0 3110.9 7.93 Vp
42.7924 142.9476 40.0 781.1 7.34 Vp
42.8643 142.8728 40.0 1095.7 7.97 Vp
42.9363 142.7978 40.0 1061.0 8.09 Vp
43.0081 142.7227 40.0 130.2 6.86 Vp
43.0800 142.6474 40.0 191.4 6.87 Vp
43.1518 142.5719 40.0 234.8 7.10 Vp
43.2235 142.4962 40.0 132.0 7.51 Vp
43.2952 142.4204 40.0 231.8 7.94 Vp
43.3668 142.3443 40.0 136.5 7.64 Vp
43.4384 142.2681 40.0 5.0 7.33 Vp
43.5099 142.1918 40.0 0.0 7.17 Vp
43.5813 142.1152 40.0 0.0 7.18 Vp
42.1696 143.6618 40.0 0.0 7.45 Vp
42.2420 143.5886 40.0 1.2 7.45 Vp
42.3144 143.5152 40.0 47.3 7.45 Vp
42.3867 143.4416 40.0 705.6 9.22 Vp
42.4590 143.3679 40.0 2001.3 8.53 Vp
42.5312 143.2940 40.0 2967.3 7.96 Vp
42.6034 143.2199 40.0 4032.3 7.92 Vp
42.6756 143.1457 40.0 2627.2 7.93 Vp
42.7477 143.0713 40.0 2120.4 7.75 Vp
42.8198 142.9967 40.0 1478.5 8.17 Vp
42.8918 142.9219 40.0 1876.7 8.23 Vp
42.9637 142.8470 40.0 918.7 8.15 Vp
43.0356 142.7718 40.0 145.7 7.13 Vp
43.1075 142.6966 40.0 68.9 6.95 Vp
43.1793 142.6211 40.0 116.8 6.71 Vp
43.2511 142.5454 40.0 81.6 7.27 Vp
43.3228 142.4696 40.0 208.2 7.96 Vp
43.3944 142.3936 40.0 82.8 7.65 Vp
43.4660 142.3174 40.0 10.7 7.39 Vp
43.5376 142.2411 40.0 0.0 7.10 Vp
43.6091 142.1646 40.0 0.0 7.25 Vp
42.1967 143.7107 40.0 0.0 7.45 Vp
42.2691 143.6375 40.0 4.5 7.45 Vp
42.3415 143.5641 40.0 44.0 7.45 Vp
42.4139 143.4906 40.0 212.1 8.53 Vp
42.4862 143.4169 40.0 1023.8 8.71 Vp
42.5585 143.3430 40.0 1293.0 7.36 Vp
42.6307 143.2690 40.0 2496.1 7.89 Vp
42.7029 143.1948 40.0 2441.5 7.45 Vp
42.7750 143.1204 40.0 2509.1 8.26 Vp
42.8471 143.0458 40.0 1322.4 7.67 Vp
42.9192 142.9711 40.0 746.2 8.03 Vp
42.9912 142.8961 40.0 742.3 8.28 Vp
43.0631 142.8210 40.0 1109.4 7.86 Vp
43.1350 142.7458 40.0 349.1 7.49 Vp
43.2068 142.6703 40.0 155.8 7.17 Vp
43.2786 142.5947 40.0 123.5 7.70 Vp
43.3504 142.5189 40.0 86.9 7.79 Vp
43.4221 142.4429 40.0 47.4 8.05 Vp
43.4937 142.3668 40.0 71.6 8.09 Vp
43.5653 142.2905 40.0 0.0 7.29 Vp
43.6368 142.2139 40.0 0.0 7.35 Vp
42.2237 143.7596 40.0 0.0 7.45 Vp
42.2962 143.6865 40.0 0.2 7.45 Vp
42.3687 143.6131 40.0 11.0 7.45 Vp
42.4411 143.5396 40.0 100.9 8.63 Vp
42.5134 143.4659 40.0 502.5 7.97 Vp
42.5857 143.3921 40.0 1103.1 7.99 Vp
42.6580 143.3181 40.0 1885.7 8.10 Vp
42.7302 143.2439 40.0 2344.1 7.88 Vp
42.8024 143.1695 40.0 1936.8 8.11 Vp
42.8745 143.0950 40.0 1087.6 7.68 Vp
42.9466 143.0202 40.0 486.4 8.00 Vp
43.0186 142.9454 40.0 505.4 7.64 Vp
43.0906 142.8703 40.0 979.4 7.83 Vp
43.1625 142.7950 40.0 508.0 7.58 Vp
43.2344 142.7196 40.0 165.7 7.01 Vp
43.3062 142.6440 40.0 224.8 7.78 Vp
43.3780 142.5683 40.0 94.2 7.75 Vp
43.4497 142.4923 40.0 90.2 7.95 Vp
43.5213 142.4162 40.0 45.8 7.43 Vp
43.5929 142.3398 40.0 0.0 7.34 Vp
43.6645 142.2634 40.0 0.0 7.35 Vp
42.2508 143.8086 40.0 0.0 7.45 Vp
42.3233 143.7355 40.0 0.0 7.45 Vp
42.3958 143.6621 40.0 3.6 7.45 Vp
42.4682 143.5887 40.0 48.6 8.01 Vp
42.5406 143.5150 40.0 460.3 8.03 Vp
42.6129 143.4412 40.0 999.3 7.45 Vp
42.6852 143.3672 40.0 1463.6 7.64 Vp
42.7575 143.2930 40.0 2143.8 7.80 Vp
42.8297 143.2187 40.0 1365.5 8.27 Vp
42.9018 143.1442 40.0 1682.9 8.22 Vp
42.9739 143.0695 40.0 748.5 7.84 Vp
43.0460 142.9946 40.0 365.6 7.74 Vp
43.1180 142.9196 40.0 774.6 8.19 Vp
43.1899 142.8443 40.0 565.4 7.66 Vp
43.2619 142.7690 40.0 126.4 7.00 Vp
43.3337 142.6934 40.0 144.7 7.50 Vp
43.4055 142.6176 40.0 53.0 7.40 Vp
43.4773 142.5417 40.0 9.3 7.23 Vp
43.5490 142.4656 40.0 0.6 7.45 Vp
43.6206 142.3893 40.0 0.0 7.43 Vp
43.6922 142.3128 40.0 0.0 7.45 Vp
42.2778 143.8576 40.0 0.0 7.45 Vp
42.3504 143.7845 40.0 0.0 7.45 Vp
42.4229 143.7112 40.0 0.8 7.45 Vp
42.4953 143.6378 40.0 18.9 7.45 Vp
42.5677 143.5641 40.0 364.0 7.93 Vp
42.6401 143.4904 40.0 731.6 7.53 Vp
42.7124 143.4164 40.0 2439.0 8.19 Vp
42.7847 143.3422 40.0 2529.4 8.23 Vp
42.8570 143.2679 40.0 1489.5 8.05 Vp
42.9291 143.1934 40.0 1743.9 8.28 Vp
43.0013 143.1187 40.0 1164.7 7.82 Vp
43.0734 143.0439 40.0 817.8 7.68 Vp
43.1454 142.9689 40.0 268.3 7.07 Vp
43.2174 142.8937 40.0 356.3 7.27 Vp
43.2893 142.8183 40.0 113.3 7.35 Vp
43.3612 142.7428 40.0 116.9 7.44 Vp
43.4330 142.6670 40.0 58.8 7.49 Vp
43.5048 142.5911 40.0 59.0 7.63 Vp
43.5766 142.5151 40.0 2.7 7.44 Vp
43.6482 142.4388 40.0 0.0 7.43 Vp
43.7198 142.3624 40.0 0.0 7.45 Vp
42.3048 143.9066 40.0 0.0 7.45 Vp
42.3774 143.8336 40.0 0.0 7.45 Vp
42.4500 143.7603 40.0 0.0 7.45 Vp
42.5224 143.6869 40.0 5.1 7.45 Vp
42.5949 143.6133 40.0 287.2 8.15 Vp
42.6673 143.5395 40.0 785.1 7.77 Vp
42.7396 143.4656 40.0 2046.1 7.89 Vp
42.8120 143.3915 40.0 1828.1 7.93 Vp
42.8842 143.3172 40.0 1364.8 7.72 Vp
42.9564 143.2427 40.0 1181.9 7.83 Vp
43.0286 143.1681 40.0 1070.0 7.39 Vp
43.1007 143.0933 40.0 1964.2 7.72 Vp
43.1728 143.0183 40.0 327.9 6.95 Vp
43.2448 142.9431 40.0 200.9 7.18 Vp
43.3168 142.8677 40.0 161.7 7.39 Vp
43.3887 142.7922 40.0 76.5 7.50 Vp
43.4606 142.7165 40.0 19.8 7.33 Vp
43.5324 142.6406 40.0 30.0 7.28 Vp
43.6041 142.5646 40.0 1.5 7.45 Vp
43.6758 142.4883 40.0 0.0 7.45 Vp
43.7475 142.4119 40.0 0.0 7.45 Vp
42.3318 143.9557 40.0 0.0 7.45 Vp
42.4044 143.8827 40.0 0.0 7.45 Vp
42.4770 143.8095 40.0 0.0 7.45 Vp
42.5495 143.7361 40.0 1.2 7.45 Vp
42.6220 143.6625 40.0 225.0 8.07 Vp
42.6944 143.5888 40.0 950.6 7.90 Vp
42.7668 143.5148 40.0 965.9 7.04 Vp
42.8392 143.4408 40.0 1130.2 7.59 Vp
42.9115 143.3665 40.0 1256.4 7.83 Vp
42.9837 143.2920 40.0 1370.5 8.06 Vp
43.0559 143.2174 40.0 743.1 7.38 Vp
43.1280 143.1426 40.0 1262.6 7.74 Vp
43.2001 143.0677 40.0 296.1 7.04 Vp
43.2722 142.9925 40.0 241.7 7.16 Vp
43.3442 142.9172 40.0 133.2 7.12 Vp
43.4161 142.8417 40.0 29.3 7.41 Vp
43.4880 142.7660 40.0 6.0 7.45 Vp
43.5599 142.6902 40.0 6.9 7.45 Vp
43.6317 142.6141 40.0 0.0 7.45 Vp
43.7034 142.5379 40.0 0.0 7.45 Vp
43.7751 142.4615 40.0 0.0 7.45 Vp
42.3588 144.0049 40.0 0.0 7.45 Vp
42.4314 143.9319 40.0 0.0 7.45 Vp
42.5040 143.8587 40.0 0.0 7.45 Vp
42.5766 143.7853 40.0 0.3 7.45 Vp
42.6491 143.7118 40.0 97.3 8.14 Vp
42.7216 143.6380 40.0 764.3 7.78 Vp
42.7940 143.5641 40.0 1382.6 7.44 Vp
42.8663 143.4901 40.0 1553.0 7.93 Vp
42.9387 143.4158 40.0 1676.3 8.19 Vp
43.0109 143.3414 40.0 1573.6 8.00 Vp
43.0832 143.2668 40.0 980.4 7.40 Vp
43.1554 143.1921 40.0 1170.6 7.75 Vp
43.2275 143.1171 40.0 499.0 7.17 Vp
43.2996 143.0420 40.0 217.9 7.25 Vp
43.3716 142.9667 40.0 88.2 7.11 Vp
43.4436 142.8912 40.0 16.3 7.45 Vp
43.5155 142.8156 40.0 23.1 7.58 Vp
43.5874 142.7398 40.0 35.4 7.56 Vp
43.6592 142.6637 40.0 7.9 7.48 Vp
43.7310 142.5876 40.0 0.0 7.48 Vp
43.8027 142.5112 40.0 0.0 7.48 Vp
42.3857 144.0541 40.0 0.0 7.45 Vp
42.4584 143.9811 40.0 0.0 7.45 Vp
42.5310 143.9079 40.0 0.0 7.45 Vp
42.6036 143.8345 40.0 0.0 7.45 Vp
42.6762 143.7610 40.0 30.6 7.54 Vp
42.7487 143.6873 40.0 648.7 8.05 Vp
42.8211 143.6135 40.0 2271.5 7.97 Vp
42.8935 143.5394 40.0 1806.8 7.32 Vp
42.9659 143.4652 40.0 1882.1 7.77 Vp
43.0382 143.3909 40.0 1878.8 7.34 Vp
43.1104 143.3163 40.0 1214.4 7.36 Vp
43.1826 143.2415 40.0 879.4 7.41 Vp
43.2548 143.1666 40.0 450.6 7.20 Vp
43.3269 143.0915 40.0 198.1 7.08 Vp
43.3990 143.0163 40.0 87.7 7.16 Vp
43.4710 142.9408 40.0 62.3 7.36 Vp
43.5430 142.8652 40.0 50.4 7.49 Vp
43.6149 142.7894 40.0 77.8 7.44 Vp
43.6867 142.7134 40.0 21.9 7.48 Vp
43.7585 142.6372 40.0 0.0 7.48 Vp
43.8303 142.5609 40.0 0.0 7.48 Vp
42.4396 144.1525 40.0 0.0 7.45 Vp
42.5123 144.0796 40.0 0.0 7.45 Vp
42.5850 144.0065 40.0 0.0 7.45 Vp
42.6576 143.9332 40.0 0.0 7.45 Vp
42.7302 143.8597 40.0 1.7 7.45 Vp
42.8028 143.7861 40.0 394.8 7.96 Vp
42.8753 143.7123 40.0 1897.9 7.75 Vp
42.9478 143.6383 40.0 2059.0 7.74 Vp
43.0202 143.5642 40.0 1240.9 7.34 Vp
43.0926 143.4898 40.0 1360.8 7.09 Vp
43.1649 143.4153 40.0 1255.8 7.49 Vp
43.2372 143.3406 40.0 693.0 7.14 Vp
43.3094 143.2657 40.0 565.6 7.52 Vp
43.3816 143.1907 40.0 337.8 6.97 Vp
43.4537 143.1155 40.0 134.9 7.06 Vp
43.5258 143.0401 40.0 187.9 7.57 Vp
43.5978 142.9645 40.0 28.9 7.26 Vp
43.6698 142.8887 40.0 13.8 7.48 Vp
43.7417 142.8128 40.0 6.0 7.48 Vp
43.8135 142.7367 40.0 0.0 7.48 Vp
43.8853 142.6604 40.0 0.0 7.48 Vp
42.4933 144.2512 40.0 0.0 7.48 Vp
42.5661 144.1783 40.0 0.0 7.48 Vp
42.6389 144.1052 40.0 0.0 7.48 Vp
42.7116 144.0320 40.0 0.0 7.48 Vp
42.7842 143.9586 40.0 0.0 7.48 Vp
42.8568 143.8850 40.0 243.7 7.79 Vp
42.9294 143.8113 40.0 1700.5 7.72 Vp
43.0019 143.7374 40.0 1709.5 7.71 Vp
43.0744 143.6632 40.0 588.4 7.00 Vp
43.1469 143.5890 40.0 1015.1 6.95 Vp
43.2192 143.5145 40.0 908.8 7.12 Vp
43.2916 143.4399 40.0 343.7 6.86 Vp
43.3639 143.3651 40.0 209.1 7.25 Vp
43.4361 143.2901 40.0 103.6 7.04 Vp
43.5083 143.2149 40.0 79.2 7.17 Vp
43.5804 143.1395 40.0 96.6 7.27 Vp
43.6525 143.0640 40.0 26.3 7.48 Vp
43.7245 142.9883 40.0 10.8 7.48 Vp
43.7965 142.9124 40.0 8.3 7.48 Vp
43.8685 142.8364 40.0 0.0 7.48 Vp
43.9403 142.7601 40.0 0.0 7.48 Vp
42.5470 144.3500 40.0 0.0 7.48 Vp
42.6198 144.2772 40.0 0.0 7.48 Vp
42.6926 144.2042 40.0 0.0 7.48 Vp
42.7654 144.1310 40.0 0.0 7.48 Vp
42.8381 144.0576 40.0 0.0 7.48 Vp
42.9108 143.9841 40.0 75.7 7.75 Vp
42.9834 143.9104 40.0 932.4 8.01 Vp
43.0560 143.8365 40.0 1375.3 7.99 Vp
43.1286 143.7625 40.0 988.5 7.26 Vp
43.2011 143.6883 40.0 1642.0 7.41 Vp
43.2735 143.6139 40.0 864.4 7.25 Vp
43.3459 143.5393 40.0 179.8 7.10 Vp
43.4183 143.4645 40.0 154.6 7.43 Vp
43.4906 143.3896 40.0 43.9 6.95 Vp
43.5628 143.3145 40.0 80.2 6.92 Vp
43.6350 143.2392 40.0 66.2 7.08 Vp
43.7072 143.1637 40.0 29.0 7.48 Vp
43.7793 143.0880 40.0 24.1 7.48 Vp
43.8513 143.0122 40.0 7.1 7.48 Vp
43.9233 142.9362 40.0 0.0 7.48 Vp
43.9952 142.8600 40.0 0.0 7.48 Vp
42.6005 144.4490 40.0 0.0 7.48 Vp
42.6734 144.3762 40.0 0.0 7.48 Vp
42.7463 144.3033 40.0 0.0 7.48 Vp
42.8191 144.2301 40.0 0.0 7.48 Vp
42.8919 144.1568 40.0 0.0 7.48 Vp
42.9647 144.0834 40.0 6.9 7.48 Vp
43.0374 144.0097 40.0 184.8 7.68 Vp
43.1100 143.9359 40.0 395.6 7.56 Vp
43.1826 143.8619 40.0 477.3 7.36 Vp
43.2552 143.7878 40.0 365.8 7.23 Vp
43.3277 143.7134 40.0 543.0 7.70 Vp
43.4002 143.6389 40.0 225.8 7.22 Vp
43.4726 143.5642 40.0 175.7 7.59 Vp
43.5449 143.4893 40.0 85.8 7.33 Vp
43.6172 143.4142 40.0 31.7 6.91 Vp
43.6895 143.3390 40.0 12.6 7.48 Vp
43.7617 143.2635 40.0 8.8 7.48 Vp
43.8339 143.1880 40.0 13.6 7.48 Vp
43.9060 143.1122 40.0 3.2 7.48 Vp
43.9780 143.0362 40.0 0.0 7.48 Vp
44.0500 142.9601 40.0 0.0 7.48 Vp
42.6540 144.5481 40.0 0.0 7.48 Vp
42.7270 144.4754 40.0 0.0 7.48 Vp
42.7999 144.4025 40.0 0.0 7.48 Vp
42.8728 144.3294 40.0 0.0 7.48 Vp
42.9457 144.2562 40.0 0.0 7.48 Vp
43.0185 144.1828 40.0 0.0 7.48 Vp
43.0912 144.1092 40.0 0.0 7.48 Vp
43.1639 144.0355 40.0 0.3 7.48 Vp
43.2366 143.9615 40.0 8.1 7.48 Vp
43.3092 143.8874 40.0 0.9 7.48 Vp
43.3818 143.8131 40.0 12.2 7.48 Vp
43.4543 143.7386 40.0 36.8 7.26 Vp
43.5268 143.6640 40.0 34.8 7.34 Vp
43.5992 143.5892 40.0 51.8 7.53 Vp
43.6716 143.5141 40.0 21.8 7.48 Vp
43.7439 143.4390 40.0 0.0 7.48 Vp
43.8162 143.3636 40.0 0.0 7.48 Vp
43.8884 143.2880 40.0 0.0 7.48 Vp
43.9606 143.2123 40.0 0.0 7.48 Vp
44.0327 143.1364 40.0 0.0 7.48 Vp
44.1047 143.0603 40.0 0.0 7.48 Vp
41.0121 141.6452 45.0 0.0 7.63 Vp
41.0832 141.5710 45.0 0.0 7.63 Vp
41.1543 141.4966 45.0 0.0 7.75 Vp
41.2254 141.4221 45.0 0.0 7.74 Vp
41.2964 141.3473 45.0 0.4 7.88 Vp
41.3674 141.2725 45.0 0.5 7.70 Vp
41.4383 141.1974 45.0 0.0 7.87 Vp
41.5091 141.1222 45.0 0.0 7.83 Vp
41.5800 141.0468 45.0 0.0 7.81 Vp
41.6507 140.9713 45.0 0.0 7.97 Vp
41.7215 140.8956 45.0 0.0 7.93 Vp
41.7921 140.8197 45.0 0.0 7.89 Vp
41.8628 140.7436 45.0 0.0 7.69 Vp
41.9333 140.6674 45.0 0.0 7.48 Vp
42.0039 140.5911 45.0 0.0 7.61 Vp
42.0743 140.5145 45.0 0.0 7.55 Vp
42.1447 140.4378 45.0 0.0 7.63 Vp
42.2151 140.3609 45.0 0.0 7.62 Vp
42.2854 140.2838 45.0 0.0 7.61 Vp
42.3557 140.2066 45.0 0.0 7.53 Vp
42.4259 140.1292 45.0 0.0 7.47 Vp
41.0680 141.7396 45.0 0.0 7.63 Vp
41.1392 141.6655 45.0 0.0 7.64 Vp
41.2103 141.5911 45.0 0.0 7.69 Vp
41.2815 141.5166 45.0 0.0 7.67 Vp
41.3525 141.4419 45.0 34.1 7.64 Vp
41.4236 141.3671 45.0 151.1 7.65 Vp
41.4945 141.2921 45.0 59.0 7.84 Vp
41.5655 141.2169 45.0 7.4 7.88 Vp
41.6364 141.1415 45.0 6.1 7.93 Vp
41.7072 141.0660 45.0 3.7 7.99 Vp
41.7780 140.9904 45.0 2.1 7.98 Vp
41.8487 140.9145 45.0 0.7 7.84 Vp
41.9194 140.8385 45.0 0.0 7.77 Vp
41.9900 140.7623 45.0 0.0 7.65 Vp
42.0606 140.6860 45.0 0.0 7.85 Vp
42.1312 140.6095 45.0 0.0 7.79 Vp
42.2016 140.5328 45.0 0.0 7.75 Vp
42.2721 140.4559 45.0 0.0 7.58 Vp
42.3424 140.3789 45.0 0.0 7.35 Vp
42.4128 140.3017 45.0 0.0 7.46 Vp
42.4830 140.2243 45.0 0.0 7.45 Vp
41.1238 141.8342 45.0 0.0 7.63 Vp
41.1950 141.7601 45.0 0.0 7.62 Vp
41.2663 141.6858 45.0 0.0 7.66 Vp
41.3374 141.6113 45.0 0.0 7.64 Vp
41.4086 141.5366 45.0 23.2 7.61 Vp
41.4797 141.4618 45.0 149.9 7.56 Vp
41.5507 141.3869 45.0 182.9 7.80 Vp
41.6217 141.3117 45.0 73.6 7.82 Vp
41.6927 141.2364 45.0 82.4 7.96 Vp
41.7636 141.1609 45.0 189.9 7.78 Vp
41.8344 141.0853 45.0 89.5 7.87 Vp
41.9052 141.0095 45.0 46.5 7.78 Vp
41.9760 140.9335 45.0 4.7 7.80 Vp
42.0467 140.8574 45.0 0.6 7.99 Vp
42.1173 140.7811 45.0 0.0 7.93 Vp
42.1879 140.7046 45.0 0.0 7.83 Vp
42.2585 140.6279 45.0 0.0 7.81 Vp
42.3290 140.5511 45.0 0.0 7.64 Vp
42.3994 140.4741 45.0 0.0 7.68 Vp
42.4698 140.3970 45.0 0.0 7.51 Vp
42.5401 140.3196 45.0 0.0 7.46 Vp
41.1795 141.9290 45.0 0.0 7.63 Vp
41.2508 141.8548 45.0 0.0 7.58 Vp
41.3221 141.7806 45.0 0.0 7.63 Vp
41.3934 141.7061 45.0 0.3 7.39 Vp
41.4646 141.6315 45.0 28.2 7.43 Vp
41.5357 141.5568 45.0 34.5 7.52 Vp
41.6068 141.4818 45.0 94.9 7.83 Vp
41.6779 141.4067 45.0 128.6 7.82 Vp
41.7489 141.3315 45.0 118.0 8.12 Vp
41.8199 141.2560 45.0 388.3 8.03 Vp
41.8908 141.1804 45.0 279.0 7.82 Vp
41.9617 141.1047 45.0 168.8 7.78 Vp
42.0325 141.0287 45.0 181.2 7.98 Vp
42.1032 140.9526 45.0 12.9 7.97 Vp
42.1740 140.8763 45.0 0.8 7.83 Vp
42.2446 140.7999 45.0 0.4 7.78 Vp
42.3152 140.7233 45.0 0.0 7.75 Vp
42.3858 140.6465 45.0 0.0 7.69 Vp
42.4563 140.5695 45.0 0.0 7.59 Vp
42.5267 140.4924 45.0 0.0 7.51 Vp
42.5971 140.4151 45.0 0.0 7.52 Vp
41.2351 142.0239 45.0 0.0 7.63 Vp
41.3065 141.9498 45.0 0.0 7.54 Vp
41.3779 141.8756 45.0 0.0 7.61 Vp
41.4492 141.8012 45.0 14.1 7.36 Vp
41.5205 141.7266 45.0 96.2 7.30 Vp
41.5917 141.6519 45.0 44.5 7.56 Vp
41.6629 141.5770 45.0 179.3 7.96 Vp
41.7340 141.5019 45.0 390.1 8.13 Vp
41.8051 141.4267 45.0 232.9 8.10 Vp
41.8761 141.3513 45.0 171.1 8.14 Vp
41.9471 141.2757 45.0 231.3 7.93 Vp
42.0180 141.2000 45.0 303.7 7.94 Vp
42.0889 141.1241 45.0 411.4 7.88 Vp
42.1597 141.0480 45.0 55.9 7.88 Vp
42.2305 140.9718 45.0 5.0 7.83 Vp
42.3012 140.8954 45.0 1.3 7.75 Vp
42.3719 140.8188 45.0 0.0 7.69 Vp
42.4425 140.7421 45.0 0.0 7.55 Vp
42.5131 140.6651 45.0 0.0 7.59 Vp
42.5836 140.5880 45.0 0.0 7.54 Vp
42.6541 140.5108 45.0 0.0 7.64 Vp
41.2907 142.1189 45.0 0.0 7.63 Vp
41.3622 142.0449 45.0 0.0 7.47 Vp
41.4336 141.9707 45.0 0.0 7.42 Vp
41.5050 141.8964 45.0 8.6 7.29 Vp
41.5763 141.8219 45.0 42.6 7.28 Vp
41.6476 141.7472 45.0 198.8 7.52 Vp
41.7188 141.6723 45.0 330.1 7.93 Vp
41.7900 141.5973 45.0 234.3 7.71 Vp
41.8612 141.5221 45.0 199.1 7.96 Vp
41.9323 141.4467 45.0 156.8 8.02 Vp
42.0033 141.3712 45.0 260.5 7.99 Vp
42.0743 141.2955 45.0 843.0 8.01 Vp
42.1453 141.2196 45.0 569.7 7.71 Vp
42.2162 141.1436 45.0 227.0 7.76 Vp
42.2870 141.0674 45.0 111.2 7.82 Vp
42.3578 140.9910 45.0 52.3 7.69 Vp
42.4285 140.9145 45.0 7.3 7.54 Vp
42.4992 140.8378 45.0 0.0 7.63 Vp
42.5699 140.7609 45.0 0.0 7.68 Vp
42.6404 140.6838 45.0 0.0 7.66 Vp
42.7110 140.6066 45.0 0.0 7.78 Vp
41.3462 142.2142 45.0 0.0 7.59 Vp
41.4177 142.1402 45.0 0.0 7.43 Vp
41.4892 142.0661 45.0 0.0 7.31 Vp
41.5607 141.9917 45.0 3.7 7.27 Vp
41.6321 141.9173 45.0 14.1 7.43 Vp
41.7034 141.8426 45.0 171.2 7.49 Vp
41.7747 141.7678 45.0 115.9 7.68 Vp
41.8460 141.6928 45.0 111.6 7.80 Vp
41.9172 141.6177 45.0 161.3 7.90 Vp
41.9883 141.5424 45.0 467.8 7.90 Vp
42.0595 141.4669 45.0 1000.5 7.86 Vp
42.1305 141.3912 45.0 1636.1 7.86 Vp
42.2015 141.3154 45.0 638.8 7.70 Vp
42.2725 141.2394 45.0 288.4 7.69 Vp
42.3434 141.1632 45.0 279.1 7.76 Vp
42.4143 141.0869 45.0 310.5 7.72 Vp
42.4851 141.0104 45.0 143.6 7.76 Vp
42.5558 140.9337 45.0 9.7 7.75 Vp
42.6265 140.8568 45.0 0.7 7.80 Vp
42.6972 140.7798 45.0 0.0 7.80 Vp
42.7677 140.7026 45.0 0.0 7.87 Vp
41.4016 142.3096 45.0 0.0 7.51 Vp
41.4732 142.2357 45.0 0.0 7.32 Vp
41.5448 142.1616 45.0 0.0 7.27 Vp
41.6163 142.0873 45.0 3.7 7.37 Vp
41.6877 142.0129 45.0 34.4 7.64 Vp
41.7592 141.9382 45.0 131.9 7.69 Vp
41.8305 141.8635 45.0 125.6 7.78 Vp
41.9018 141.7885 45.0 370.0 7.79 Vp
41.9731 141.7134 45.0 231.1 7.81 Vp
42.0443 141.6381 45.0 644.1 7.86 Vp
42.1155 141.5627 45.0 1000.5 7.75 Vp
42.1866 141.4871 45.0 931.9 7.75 Vp
42.2577 141.4113 45.0 317.5 7.76 Vp
42.3287 141.3353 45.0 182.5 7.60 Vp
42.3997 141.2592 45.0 233.5 7.66 Vp
42.4706 141.1829 45.0 348.8 7.74 Vp
42.5415 141.1064 45.0 261.8 7.59 Vp
42.6123 141.0298 45.0 128.1 7.70 Vp
42.6831 140.9529 45.0 48.4 7.81 Vp
42.7538 140.8760 45.0 2.3 7.86 Vp
42.8245 140.7988 45.0 0.0 7.83 Vp
41.4570 142.4052 45.0 0.0 7.53 Vp
41.5286 142.3313 45.0 0.0 7.52 Vp
41.6003 142.2572 45.0 0.2 7.42 Vp
41.6718 142.1830 45.0 6.4 7.53 Vp
41.7433 142.1086 45.0 119.7 7.82 Vp
41.8148 142.0340 45.0 388.5 7.78 Vp
41.8863 141.9593 45.0 503.8 7.84 Vp
41.9576 141.8844 45.0 595.7 7.66 Vp
42.0290 141.8093 45.0 387.7 7.69 Vp
42.1003 141.7341 45.0 550.9 7.84 Vp
42.1715 141.6587 45.0 515.9 7.77 Vp
42.2427 141.5831 45.0 375.4 7.86 Vp
42.3138 141.5073 45.0 249.4 7.73 Vp
42.3849 141.4314 45.0 292.8 7.56 Vp
42.4560 141.3553 45.0 343.1 7.46 Vp
42.5270 141.2791 45.0 435.4 7.56 Vp
42.5979 141.2026 45.0 245.2 7.58 Vp
42.6688 141.1260 45.0 167.5 7.68 Vp
42.7396 141.0493 45.0 123.1 7.72 Vp
42.8104 140.9723 45.0 24.2 7.79 Vp
42.8811 140.8952 45.0 0.0 7.68 Vp
41.5123 142.5009 45.0 0.0 7.55 Vp
41.5840 142.4271 45.0 0.0 7.61 Vp
41.6557 142.3531 45.0 2.2 7.61 Vp
41.7273 142.2789 45.0 56.8 7.75 Vp
41.7989 142.2045 45.0 385.5 7.96 Vp
41.8704 142.1300 45.0 793.4 7.90 Vp
41.9419 142.0553 45.0 817.3 7.63 Vp
42.0134 141.9804 45.0 887.7 7.64 Vp
42.0848 141.9054 45.0 839.4 7.66 Vp
42.1561 141.8302 45.0 1126.6 7.80 Vp
42.2274 141.7549 45.0 1048.9 7.74 Vp
42.2987 141.6793 45.0 628.3 7.79 Vp
42.3699 141.6036 45.0 362.1 7.75 Vp
42.4410 141.5277 45.0 411.9 7.66 Vp
42.5121 141.4517 45.0 466.4 7.59 Vp
42.5832 141.3754 45.0 463.5 7.71 Vp
42.6542 141.2990 45.0 170.7 7.71 Vp
42.7251 141.2225 45.0 152.3 7.74 Vp
42.7960 141.1457 45.0 63.4 7.66 Vp
42.8669 141.0688 45.0 11.2 7.67 Vp
42.9376 140.9917 45.0 0.0 7.72 Vp
41.5674 142.5968 45.0 0.0 7.63 Vp
41.6392 142.5230 45.0 0.0 7.70 Vp
41.7110 142.4491 45.0 49.2 7.80 Vp
41.7827 142.3749 45.0 245.5 7.96 Vp
41.8543 142.3006 45.0 798.9 8.00 Vp
41.9259 142.2261 45.0 1844.0 7.74 Vp
41.9975 142.1515 45.0 1795.8 7.67 Vp
42.0690 142.0767 45.0 1509.2 7.74 Vp
42.1405 142.0017 45.0 1363.1 7.74 Vp
42.2119 141.9265 45.0 1512.2 7.74 Vp
42.2832 141.8512 45.0 1212.0 7.76 Vp
42.3546 141.7757 45.0 839.4 7.76 Vp
42.4258 141.7000 45.0 636.7 7.85 Vp
42.4971 141.6242 45.0 479.6 7.86 Vp
42.5682 141.5482 45.0 563.5 7.73 Vp
42.6393 141.4720 45.0 510.7 7.93 Vp
42.7104 141.3956 45.0 184.8 7.77 Vp
42.7814 141.3191 45.0 81.8 7.70 Vp
42.8524 141.2424 45.0 22.9 7.65 Vp
42.9233 141.1655 45.0 5.6 7.59 Vp
42.9941 141.0885 45.0 0.0 7.70 Vp
41.6226 142.6929 45.0 0.0 7.63 Vp
41.6944 142.6192 45.0 0.0 7.72 Vp
41.7662 142.5452 45.0 71.7 7.82 Vp
41.8380 142.4711 45.0 348.1 8.00 Vp
41.9097 142.3969 45.0 1030.8 7.75 Vp
41.9814 142.3224 45.0 2454.8 7.69 Vp
42.0530 142.2478 45.0 3527.8 7.99 Vp
42.1246 142.1730 45.0 2702.1 7.84 Vp
42.1961 142.0981 45.0 1887.3 7.74 Vp
42.2676 142.0230 45.0 1563.3 7.73 Vp
42.3390 141.9477 45.0 2010.8 7.87 Vp
42.4104 141.8723 45.0 1893.3 7.85 Vp
42.4817 141.7966 45.0 1056.9 7.87 Vp
42.5530 141.7208 45.0 1018.8 7.96 Vp
42.6242 141.6449 45.0 520.8 7.79 Vp
42.6954 141.5687 45.0 568.5 8.16 Vp
42.7665 141.4924 45.0 385.2 7.89 Vp
42.8376 141.4159 45.0 122.5 7.62 Vp
42.9086 141.3392 45.0 44.2 7.59 Vp
42.9796 141.2624 45.0 4.1 7.62 Vp
43.0505 141.1854 45.0 0.0 7.64 Vp
41.6776 142.7892 45.0 0.0 7.63 Vp
41.7495 142.7155 45.0 1.6 7.73 Vp
41.8214 142.6416 45.0 38.1 7.70 Vp
41.8932 142.5675 45.0 491.1 7.59 Vp
41.9650 142.4933 45.0 1812.1 7.70 Vp
42.0367 142.4189 45.0 3425.5 8.14 Vp
42.1084 142.3443 45.0 5571.6 8.13 Vp
42.1800 142.2696 45.0 4793.8 7.80 Vp
42.2516 142.1947 45.0 2037.7 7.09 Vp
42.3232 142.1196 45.0 3103.3 8.64 Vp
42.3947 142.0444 45.0 3189.6 8.55 Vp
42.4661 141.9690 45.0 1315.6 6.73 Vp
42.5375 141.8934 45.0 2013.6 8.46 Vp
42.6089 141.8176 45.0 1451.8 7.65 Vp
42.6802 141.7417 45.0 433.8 7.78 Vp
42.7514 141.6656 45.0 996.7 8.47 Vp
42.8226 141.5893 45.0 779.3 8.06 Vp
42.8937 141.5129 45.0 151.1 7.50 Vp
42.9648 141.4362 45.0 39.8 7.13 Vp
43.0358 141.3594 45.0 0.0 7.71 Vp
43.1068 141.2825 45.0 0.0 7.65 Vp
41.7325 142.8856 45.0 0.0 7.74 Vp
41.8045 142.8119 45.0 7.6 7.90 Vp
41.8765 142.7381 45.0 155.6 7.69 Vp
41.9483 142.6641 45.0 826.5 7.63 Vp
42.0202 142.5899 45.0 2382.1 7.48 Vp
42.0920 142.5155 45.0 3125.5 6.92 Vp
42.1637 142.4410 45.0 4536.6 7.62 Vp
42.2354 142.3663 45.0 4195.4 7.48 Vp
42.3071 142.2915 45.0 3109.2 7.78 Vp
42.3787 142.2164 45.0 2564.9 7.54 Vp
42.4503 142.1413 45.0 881.9 7.44 Vp
42.5218 142.0659 45.0 317.2 7.06 Vp
42.5932 141.9903 45.0 587.6 7.07 Vp
42.6646 141.9146 45.0 880.4 8.00 Vp
42.7360 141.8387 45.0 897.7 8.28 Vp
42.8073 141.7627 45.0 840.6 7.82 Vp
42.8786 141.6864 45.0 592.7 8.21 Vp
42.9498 141.6100 45.0 134.7 7.91 Vp
43.0209 141.5334 45.0 22.2 7.87 Vp
43.0920 141.4567 45.0 0.0 7.78 Vp
43.1631 141.3797 45.0 0.0 7.66 Vp
41.7600 142.9338 45.0 0.0 7.78 Vp
41.8320 142.8602 45.0 11.4 8.14 Vp
41.9040 142.7864 45.0 113.8 8.06 Vp
41.9759 142.7124 45.0 502.3 7.53 Vp
42.0478 142.6383 45.0 2567.3 7.78 Vp
42.1196 142.5639 45.0 2928.7 7.08 Vp
42.1914 142.4894 45.0 2184.0 6.86 Vp
42.2631 142.4148 45.0 1518.1 6.76 Vp
42.3348 142.3399 45.0 1746.0 7.60 Vp
42.4064 142.2649 45.0 1326.4 7.70 Vp
42.4780 142.1898 45.0 1282.1 8.27 Vp
42.5496 142.1144 45.0 822.7 8.05 Vp
42.6211 142.0389 45.0 279.9 7.32 Vp
42.6925 141.9632 45.0 256.6 7.24 Vp
42.7639 141.8873 45.0 421.8 8.11 Vp
42.8352 141.8113 45.0 550.4 8.00 Vp
42.9065 141.7351 45.0 185.4 7.77 Vp
42.9778 141.6587 45.0 106.7 8.09 Vp
43.0489 141.5821 45.0 12.5 7.82 Vp
43.1201 141.5054 45.0 0.0 7.70 Vp
43.1911 141.4285 45.0 0.0 7.62 Vp
41.7874 142.9822 45.0 0.0 7.86 Vp
41.8595 142.9085 45.0 3.8 8.17 Vp
41.9315 142.8347 45.0 44.9 7.92 Vp
42.0034 142.7608 45.0 751.0 7.33 Vp
42.0753 142.6867 45.0 3234.5 7.55 Vp
42.1472 142.6124 45.0 3487.1 7.19 Vp
42.2190 142.5379 45.0 2490.8 7.11 Vp
42.2908 142.4633 45.0 2501.3 7.45 Vp
42.3625 142.3884 45.0 1918.5 7.56 Vp
42.4342 142.3135 45.0 1348.0 7.60 Vp
42.5058 142.2383 45.0 1377.9 7.95 Vp
42.5773 142.1630 45.0 1504.2 8.02 Vp
42.6489 142.0875 45.0 1012.4 7.81 Vp
42.7203 142.0118 45.0 293.5 7.29 Vp
42.7918 141.9359 45.0 231.3 7.78 Vp
42.8631 141.8599 45.0 359.6 7.82 Vp
42.9345 141.7837 45.0 243.1 7.89 Vp
43.0057 141.7074 45.0 124.7 8.10 Vp
43.0769 141.6308 45.0 17.2 7.77 Vp
43.1481 141.5541 45.0 0.0 7.68 Vp
43.2192 141.4772 45.0 0.0 7.60 Vp
41.8148 143.0305 45.0 0.0 7.93 Vp
41.8869 142.9569 45.0 2.7 8.00 Vp
41.9589 142.8831 45.0 70.3 8.14 Vp
42.0309 142.8092 45.0 714.7 7.19 Vp
42.1028 142.7351 45.0 2965.6 7.35 Vp
42.1747 142.6608 45.0 3990.8 7.54 Vp
42.2466 142.5864 45.0 2134.3 6.39 Vp
42.3184 142.5118 45.0 2698.6 7.18 Vp
42.3901 142.4370 45.0 3053.7 7.85 Vp
42.4618 142.3620 45.0 2595.6 7.79 Vp
42.5335 142.2869 45.0 1321.0 8.04 Vp
42.6051 142.2116 45.0 927.5 7.44 Vp
42.6767 142.1361 45.0 1665.5 7.95 Vp
42.7482 142.0604 45.0 1122.2 8.36 Vp
42.8196 141.9846 45.0 373.4 7.84 Vp
42.8910 141.9086 45.0 491.5 8.25 Vp
42.9624 141.8324 45.0 587.3 8.40 Vp
43.0337 141.7561 45.0 122.6 7.78 Vp
43.1049 141.6796 45.0 18.6 7.50 Vp
43.1761 141.6029 45.0 0.0 7.47 Vp
43.2472 141.5260 45.0 0.0 7.48 Vp
41.8422 143.0789 45.0 0.0 7.74 Vp
41.9143 143.0053 45.0 0.3 8.07 Vp
41.9864 142.9316 45.0 85.8 7.90 Vp
42.0584 142.8577 45.0 682.9 7.39 Vp
42.1304 142.7836 45.0 2224.7 6.95 Vp
42.2023 142.7094 45.0 3783.2 6.98 Vp
42.2742 142.6349 45.0 2124.3 6.48 Vp
42.3460 142.5603 45.0 2028.4 6.74 Vp
42.4178 142.4855 45.0 2395.6 7.56 Vp
42.4895 142.4106 45.0 1841.6 7.85 Vp
42.5612 142.3355 45.0 1022.5 7.46 Vp
42.6328 142.2602 45.0 1372.8 7.86 Vp
42.7044 142.1848 45.0 1934.8 8.22 Vp
42.7760 142.1091 45.0 1250.5 8.07 Vp
42.8475 142.0333 45.0 764.5 8.28 Vp
42.9189 141.9573 45.0 353.1 7.82 Vp
42.9903 141.8812 45.0 454.7 8.09 Vp
43.0616 141.8049 45.0 110.9 7.61 Vp
43.1329 141.7284 45.0 12.2 7.49 Vp
43.2041 141.6517 45.0 0.0 7.47 Vp
43.2753 141.5748 45.0 0.0 7.49 Vp
41.8696 143.1273 45.0 0.0 7.81 Vp
41.9417 143.0538 45.0 0.0 7.47 Vp
42.0138 142.9801 45.0 43.6 7.35 Vp
42.0859 142.9062 45.0 473.7 6.93 Vp
42.1579 142.8321 45.0 1370.2 6.95 Vp
42.2298 142.7579 45.0 2870.7 6.82 Vp
42.3017 142.6835 45.0 2727.7 6.99 Vp
42.3736 142.6089 45.0 1633.2 6.88 Vp
42.4454 142.5342 45.0 1840.4 7.41 Vp
42.5172 142.4593 45.0 1546.4 7.69 Vp
42.5889 142.3842 45.0 600.4 6.96 Vp
42.6606 142.3089 45.0 959.6 7.33 Vp
42.7322 142.2335 45.0 686.2 7.12 Vp
42.8037 142.1579 45.0 576.9 7.84 Vp
42.8753 142.0821 45.0 529.5 7.95 Vp
42.9467 142.0061 45.0 176.7 7.56 Vp
43.0181 141.9300 45.0 279.3 8.10 Vp
43.0895 141.8537 45.0 174.3 8.02 Vp
43.1608 141.7772 45.0 22.9 7.51 Vp
43.2321 141.7006 45.0 0.0 7.33 Vp
43.3033 141.6237 45.0 0.0 7.37 Vp
41.8969 143.1758 45.0 0.0 7.60 Vp
41.9691 143.1023 45.0 0.0 7.42 Vp
42.0412 143.0286 45.0 27.1 7.31 Vp
42.1133 142.9547 45.0 278.9 6.87 Vp
42.1853 142.8807 45.0 1305.6 7.20 Vp
42.2573 142.8065 45.0 1927.2 6.34 Vp
42.3293 142.7321 45.0 2489.8 6.82 Vp
42.4011 142.6576 45.0 1915.5 6.78 Vp
42.4730 142.5828 45.0 1403.0 7.06 Vp
42.5448 142.5079 45.0 2767.1 8.14 Vp
42.6166 142.4329 45.0 2107.6 7.85 Vp
42.6883 142.3577 45.0 1312.7 7.89 Vp
42.7599 142.2822 45.0 361.8 6.91 Vp
42.8315 142.2066 45.0 540.2 7.57 Vp
42.9031 142.1309 45.0 360.2 7.65 Vp
42.9746 142.0549 45.0 138.3 7.38 Vp
43.0460 141.9788 45.0 184.5 7.70 Vp
43.1174 141.9026 45.0 215.1 8.07 Vp
43.1887 141.8261 45.0 39.8 7.42 Vp
43.2600 141.7495 45.0 0.0 7.34 Vp
43.3313 141.6727 45.0 0.0 7.38 Vp
41.9243 143.2243 45.0 0.0 7.59 Vp
41.9965 143.1508 45.0 0.1 7.53 Vp
42.0686 143.0771 45.0 51.5 7.54 Vp
42.1407 143.0033 45.0 513.4 6.85 Vp
42.2128 142.9293 45.0 1320.0 6.83 Vp
42.2848 142.8551 45.0 1505.3 6.84 Vp
42.3568 142.7808 45.0 2200.3 6.82 Vp
42.4287 142.7062 45.0 2029.8 6.98 Vp
42.5006 142.6315 45.0 2307.9 7.74 Vp
42.5724 142.5567 45.0 3123.4 8.05 Vp
42.6442 142.4816 45.0 2113.4 7.83 Vp
42.7159 142.4064 45.0 1251.9 7.48 Vp
42.7876 142.3310 45.0 910.2 7.85 Vp
42.8592 142.2555 45.0 622.8 7.76 Vp
42.9308 142.1797 45.0 194.7 7.33 Vp
43.0024 142.1038 45.0 189.8 7.62 Vp
43.0738 142.0277 45.0 97.3 7.48 Vp
43.1453 141.9515 45.0 72.7 7.59 Vp
43.2166 141.8750 45.0 23.8 7.45 Vp
43.2880 141.7984 45.0 0.0 7.38 Vp
43.3592 141.7216 45.0 0.0 7.46 Vp
41.9516 143.2729 45.0 0.0 7.63 Vp
42.0238 143.1994 45.0 0.2 7.38 Vp
42.0960 143.1258 45.0 108.5 7.37 Vp
42.1681 143.0519 45.0 635.1 6.55 Vp
42.2402 142.9780 45.0 1484.6 6.71 Vp
42.3123 142.9038 45.0 2959.0 6.39 Vp
42.3843 142.8295 45.0 2531.3 6.48 Vp
42.4562 142.7550 45.0 2217.1 6.74 Vp
42.5281 142.6803 45.0 1286.3 6.62 Vp
42.6000 142.6055 45.0 1165.7 7.02 Vp
42.6718 142.5304 45.0 1166.6 7.31 Vp
42.7436 142.4552 45.0 1064.6 7.41 Vp
42.8153 142.3799 45.0 2296.8 8.88 Vp
42.8870 142.3043 45.0 1078.6 8.52 Vp
42.9586 142.2286 45.0 141.7 7.70 Vp
43.0301 142.1527 45.0 177.4 7.62 Vp
43.1016 142.0767 45.0 86.4 7.44 Vp
43.1731 142.0004 45.0 32.1 7.33 Vp
43.2445 141.9240 45.0 19.4 7.38 Vp
43.3159 141.8474 45.0 0.0 7.42 Vp
43.3872 141.7706 45.0 0.0 7.44 Vp
41.9788 143.3215 45.0 0.0 7.63 Vp
42.0511 143.2480 45.0 0.6 7.59 Vp
42.1233 143.1744 45.0 107.8 7.54 Vp
42.1955 143.1006 45.0 574.1 6.97 Vp
42.2676 143.0267 45.0 2389.4 7.26 Vp
42.3397 142.9525 45.0 4038.0 7.14 Vp
42.4117 142.8782 45.0 1708.9 6.33 Vp
42.4837 142.8038 45.0 1560.9 6.82 Vp
42.5557 142.7291 45.0 1377.3 6.73 Vp
42.6276 142.6543 45.0 640.8 6.66 Vp
42.6994 142.5793 45.0 350.4 6.51 Vp
42.7712 142.5041 45.0 573.8 6.91 Vp
42.8430 142.4288 45.0 808.2 7.15 Vp
42.9147 142.3532 45.0 562.5 7.46 Vp
42.9863 142.2776 45.0 107.6 7.53 Vp
43.0579 142.2017 45.0 114.6 7.58 Vp
43.1294 142.1256 45.0 84.0 7.40 Vp
43.2009 142.0494 45.0 64.7 7.51 Vp
43.2724 141.9730 45.0 53.1 7.92 Vp
43.3437 141.8965 45.0 0.0 7.54 Vp
43.4151 141.8197 45.0 0.0 7.67 Vp
42.0061 143.3701 45.0 0.0 7.63 Vp
42.0784 143.2967 45.0 0.1 7.41 Vp
42.1507 143.2231 45.0 131.4 7.42 Vp
42.2229 143.1493 45.0 993.3 7.01 Vp
42.2950 143.0754 45.0 2496.4 7.10 Vp
42.3671 143.0013 45.0 2779.5 6.44 Vp
42.4392 142.9270 45.0 1539.6 6.63 Vp
42.5112 142.8526 45.0 1431.3 6.66 Vp
42.5832 142.7779 45.0 1845.0 7.01 Vp
42.6551 142.7031 45.0 636.0 6.98 Vp
42.7270 142.6282 45.0 401.2 7.20 Vp
42.7988 142.5530 45.0 1431.0 8.63 Vp
42.8706 142.4777 45.0 807.8 7.68 Vp
42.9423 142.4022 45.0 275.3 7.33 Vp
43.0140 142.3265 45.0 226.4 7.59 Vp
43.0856 142.2507 45.0 153.3 7.56 Vp
43.1572 142.1747 45.0 90.8 7.24 Vp
43.2287 142.0985 45.0 78.3 7.64 Vp
43.3002 142.0221 45.0 21.9 7.47 Vp
43.3716 141.9455 45.0 0.0 7.61 Vp
43.4430 141.8688 45.0 0.0 7.74 Vp
42.0334 143.4188 45.0 0.0 7.63 Vp
42.1057 143.3454 45.0 0.0 7.63 Vp
42.1780 143.2718 45.0 97.2 7.52 Vp
42.2502 143.1981 45.0 613.5 7.19 Vp
42.3224 143.1242 45.0 1811.7 6.96 Vp
42.3945 143.0501 45.0 1901.1 6.05 Vp
42.4666 142.9758 45.0 1664.5 6.40 Vp
42.5387 142.9014 45.0 1387.1 6.38 Vp
42.6107 142.8268 45.0 1475.3 6.89 Vp
42.6826 142.7520 45.0 623.5 7.09 Vp
42.7546 142.6771 45.0 340.5 6.84 Vp
42.8264 142.6020 45.0 1431.8 8.23 Vp
42.8982 142.5267 45.0 1200.8 8.09 Vp
42.9700 142.4512 45.0 487.2 7.86 Vp
43.0417 142.3755 45.0 319.3 7.92 Vp
43.1133 142.2997 45.0 141.3 7.72 Vp
43.1850 142.2237 45.0 116.5 7.35 Vp
43.2565 142.1476 45.0 90.4 7.62 Vp
43.3280 142.0712 45.0 9.2 7.58 Vp
43.3995 141.9947 45.0 0.0 7.67 Vp
43.4708 141.9180 45.0 0.0 7.72 Vp
42.0606 143.4675 45.0 0.0 7.63 Vp
42.1329 143.3941 45.0 0.4 7.63 Vp
42.2052 143.3206 45.0 83.3 7.43 Vp
42.2775 143.2469 45.0 458.2 6.91 Vp
42.3497 143.1730 45.0 1236.5 6.94 Vp
42.4219 143.0990 45.0 3082.9 7.01 Vp
42.4940 143.0247 45.0 2827.0 7.15 Vp
42.5661 142.9503 45.0 2599.8 7.70 Vp
42.6382 142.8757 45.0 2520.0 7.96 Vp
42.7101 142.8010 45.0 886.6 7.40 Vp
42.7821 142.7261 45.0 206.1 6.85 Vp
42.8540 142.6510 45.0 342.3 6.79 Vp
42.9258 142.5757 45.0 422.7 7.35 Vp
42.9976 142.5002 45.0 629.1 7.88 Vp
43.0694 142.4246 45.0 320.7 7.79 Vp
43.1410 142.3488 45.0 107.3 7.75 Vp
43.2127 142.2728 45.0 111.8 7.83 Vp
43.2843 142.1967 45.0 100.8 7.83 Vp
43.3558 142.1204 45.0 14.0 7.59 Vp
43.4273 142.0439 45.0 0.0 7.73 Vp
43.4987 141.9672 45.0 0.0 7.80 Vp
42.0878 143.5163 45.0 0.0 7.63 Vp
42.1602 143.4429 45.0 1.5 7.63 Vp
42.2325 143.3694 45.0 50.3 7.58 Vp
42.3048 143.2957 45.0 358.5 7.27 Vp
42.3771 143.2219 45.0 794.7 7.00 Vp
42.4493 143.1478 45.0 2061.1 6.70 Vp
42.5214 143.0736 45.0 2869.2 7.53 Vp
42.5935 142.9993 45.0 2183.9 7.39 Vp
42.6656 142.9247 45.0 1865.2 7.68 Vp
42.7376 142.8500 45.0 1690.7 7.76 Vp
42.8096 142.7751 45.0 2114.8 8.54 Vp
42.8815 142.7000 45.0 407.9 6.96 Vp
42.9534 142.6247 45.0 172.5 6.90 Vp
43.0252 142.5493 45.0 350.3 7.53 Vp
43.0970 142.4737 45.0 270.9 7.51 Vp
43.1687 142.3979 45.0 102.8 7.76 Vp
43.2404 142.3220 45.0 89.7 7.62 Vp
43.3120 142.2459 45.0 43.6 7.71 Vp
43.3836 142.1696 45.0 2.0 7.60 Vp
43.4551 142.0931 45.0 0.0 7.70 Vp
43.5265 142.0164 45.0 0.0 7.64 Vp
42.1150 143.5651 45.0 0.0 7.63 Vp
42.1874 143.4918 45.0 0.1 7.63 Vp
42.2597 143.4183 45.0 17.6 7.56 Vp
42.3321 143.3446 45.0 263.1 7.81 Vp
42.4044 143.2708 45.0 548.4 7.07 Vp
42.4766 143.1968 45.0 1506.6 7.43 Vp
42.5488 143.1226 45.0 2734.6 8.00 Vp
42.6209 143.0482 45.0 3081.6 8.40 Vp
42.6930 142.9737 45.0 2181.1 8.05 Vp
42.7651 142.8990 45.0 1601.8 7.57 Vp
42.8371 142.8241 45.0 872.4 7.00 Vp
42.9091 142.7491 45.0 240.0 7.37 Vp
42.9810 142.6739 45.0 102.8 7.34 Vp
43.0528 142.5984 45.0 489.5 7.69 Vp
43.1246 142.5229 45.0 330.9 7.53 Vp
43.1964 142.4471 45.0 106.6 7.61 Vp
43.2681 142.3712 45.0 160.3 7.84 Vp
43.3397 142.2951 45.0 85.9 7.88 Vp
43.4113 142.2188 45.0 2.8 7.62 Vp
43.4829 142.1423 45.0 0.0 7.79 Vp
43.5543 142.0657 45.0 0.0 7.65 Vp
42.1421 143.6140 45.0 0.0 7.63 Vp
42.2146 143.5406 45.0 0.0 7.63 Vp
42.2870 143.4672 45.0 2.7 7.63 Vp
42.3593 143.3935 45.0 280.3 8.56 Vp
42.4316 143.3197 45.0 1128.3 8.56 Vp
42.5039 143.2457 45.0 1678.2 7.68 Vp
42.5761 143.1716 45.0 3044.7 8.48 Vp
42.6483 143.0973 45.0 2259.2 7.66 Vp
42.7205 143.0228 45.0 2368.4 8.46 Vp
42.7925 142.9481 45.0 962.9 7.94 Vp
42.8646 142.8732 45.0 810.1 7.90 Vp
42.9366 142.7982 45.0 840.1 8.04 Vp
43.0085 142.7230 45.0 221.5 7.49 Vp
43.0804 142.6476 45.0 209.3 7.10 Vp
43.1522 142.5721 45.0 148.2 7.23 Vp
43.2240 142.4963 45.0 127.7 7.81 Vp
43.2957 142.4204 45.0 245.3 8.18 Vp
43.3674 142.3444 45.0 129.3 7.96 Vp
43.4390 142.2681 45.0 3.9 7.63 Vp
43.5106 142.1917 45.0 0.0 7.52 Vp
43.5821 142.1150 45.0 0.0 7.63 Vp
42.1693 143.6628 45.0 0.0 7.63 Vp
42.2417 143.5896 45.0 0.0 7.63 Vp
42.3142 143.5161 45.0 12.1 7.63 Vp
42.3866 143.4425 45.0 408.0 8.78 Vp
42.4589 143.3687 45.0 1727.4 8.51 Vp
42.5312 143.2948 45.0 2391.9 8.38 Vp
42.6035 143.2206 45.0 4195.0 8.48 Vp
42.6757 143.1463 45.0 2357.2 8.08 Vp
42.7478 143.0719 45.0 1376.7 8.15 Vp
42.8200 142.9972 45.0 1113.9 8.07 Vp
42.8920 142.9224 45.0 1515.6 8.28 Vp
42.9640 142.8474 45.0 852.7 8.14 Vp
43.0360 142.7722 45.0 590.0 7.57 Vp
43.1079 142.6969 45.0 135.9 7.03 Vp
43.1798 142.6213 45.0 87.2 7.07 Vp
43.2516 142.5456 45.0 89.3 7.43 Vp
43.3234 142.4697 45.0 100.5 7.70 Vp
43.3951 142.3937 45.0 42.0 7.72 Vp
43.4668 142.3174 45.0 18.7 7.62 Vp
43.5384 142.2410 45.0 0.0 7.59 Vp
43.6099 142.1644 45.0 0.0 7.63 Vp
42.1964 143.7118 45.0 0.0 7.63 Vp
42.2689 143.6385 45.0 3.3 7.63 Vp
42.3414 143.5651 45.0 18.6 7.63 Vp
42.4138 143.4915 45.0 241.4 8.87 Vp
42.4861 143.4178 45.0 1768.8 8.99 Vp
42.5585 143.3438 45.0 2248.0 7.96 Vp
42.6308 143.2697 45.0 3488.6 8.29 Vp
42.7030 143.1954 45.0 2322.7 7.68 Vp
42.7752 143.1210 45.0 2591.6 8.52 Vp
42.8474 143.0464 45.0 1925.6 8.24 Vp
42.9195 142.9716 45.0 1240.9 8.11 Vp
42.9915 142.8966 45.0 789.5 8.11 Vp
43.0635 142.8214 45.0 816.2 8.30 Vp
43.1355 142.7461 45.0 325.0 7.49 Vp
43.2074 142.6706 45.0 181.4 7.60 Vp
43.2792 142.5949 45.0 92.5 7.53 Vp
43.3510 142.5191 45.0 46.4 7.68 Vp
43.4227 142.4430 45.0 47.9 8.11 Vp
43.4944 142.3668 45.0 60.7 7.98 Vp
43.5661 142.2904 45.0 0.0 7.62 Vp
43.6377 142.2138 45.0 0.0 7.63 Vp
42.2235 143.7607 45.0 0.0 7.63 Vp
42.2960 143.6875 45.0 0.0 7.63 Vp
42.3685 143.6141 45.0 4.0 7.63 Vp
42.4410 143.5406 45.0 71.5 8.74 Vp
42.5134 143.4668 45.0 883.7 8.13 Vp
42.5857 143.3929 45.0 1688.8 8.37 Vp
42.6581 143.3188 45.0 2189.6 8.03 Vp
42.7303 143.2446 45.0 2215.8 8.26 Vp
42.8026 143.1702 45.0 2013.1 7.96 Vp
42.8747 143.0956 45.0 996.8 7.69 Vp
42.9469 143.0208 45.0 570.6 7.84 Vp
43.0189 142.9458 45.0 456.1 7.73 Vp
43.0910 142.8707 45.0 776.2 8.09 Vp
43.1630 142.7954 45.0 494.3 7.82 Vp
43.2349 142.7199 45.0 207.4 7.62 Vp
43.3068 142.6443 45.0 120.5 7.81 Vp
43.3786 142.5684 45.0 63.1 7.65 Vp
43.4504 142.4924 45.0 89.9 8.07 Vp
43.5221 142.4162 45.0 28.4 7.57 Vp
43.5938 142.3399 45.0 0.0 7.62 Vp
43.6654 142.2633 45.0 0.0 7.63 Vp
42.2505 143.8097 45.0 0.0 7.63 Vp
42.3231 143.7366 45.0 0.0 7.63 Vp
42.3956 143.6632 45.0 0.2 7.63 Vp
42.4681 143.5897 45.0 31.0 8.04 Vp
42.5406 143.5159 45.0 455.4 8.32 Vp
42.6130 143.4421 45.0 1146.7 7.72 Vp
42.6853 143.3680 45.0 1562.1 8.09 Vp
42.7576 143.2938 45.0 2247.5 8.47 Vp
42.8299 143.2194 45.0 1778.4 8.25 Vp
42.9021 143.1448 45.0 1319.7 7.88 Vp
42.9743 143.0701 45.0 614.4 7.92 Vp
43.0464 142.9951 45.0 391.4 7.65 Vp
43.1184 142.9200 45.0 574.0 7.91 Vp
43.1904 142.8447 45.0 430.6 7.89 Vp
43.2624 142.7693 45.0 169.9 7.36 Vp
43.3343 142.6937 45.0 102.2 7.94 Vp
43.4062 142.6178 45.0 34.5 7.60 Vp
43.4780 142.5419 45.0 13.1 7.49 Vp
43.5497 142.4657 45.0 1.0 7.63 Vp
43.6214 142.3894 45.0 0.0 7.63 Vp
43.6931 142.3128 45.0 0.0 7.63 Vp
42.2776 143.8588 45.0 0.0 7.63 Vp
42.3502 143.7856 45.0 0.0 7.63 Vp
42.4228 143.7123 45.0 0.0 7.63 Vp
42.4953 143.6388 45.0 13.9 7.63 Vp
42.5677 143.5651 45.0 314.9 8.36 Vp
42.6402 143.4913 45.0 777.3 7.90 Vp
42.7126 143.4172 45.0 1767.8 8.24 Vp
42.7849 143.3430 45.0 2179.5 8.27 Vp
42.8572 143.2687 45.0 1871.7 8.32 Vp
42.9294 143.1941 45.0 2088.2 8.60 Vp
43.0016 143.1194 45.0 1439.1 8.14 Vp
43.0738 143.0445 45.0 854.8 7.81 Vp
43.1459 142.9694 45.0 270.9 7.68 Vp
43.2179 142.8941 45.0 327.9 7.63 Vp
43.2899 142.8187 45.0 129.4 7.52 Vp
43.3618 142.7431 45.0 60.6 7.82 Vp
43.4337 142.6673 45.0 40.6 7.90 Vp
43.5056 142.5914 45.0 45.5 7.95 Vp
43.5774 142.5152 45.0 0.5 7.62 Vp
43.6491 142.4389 45.0 0.0 7.63 Vp
43.7208 142.3624 45.0 0.0 7.63 Vp
42.3046 143.9079 45.0 0.0 7.63 Vp
42.3773 143.8348 45.0 0.0 7.63 Vp
42.4499 143.7615 45.0 0.0 7.63 Vp
42.5224 143.6880 45.0 6.0 7.63 Vp
42.5949 143.6143 45.0 265.5 8.29 Vp
42.6674 143.5405 45.0 912.4 8.32 Vp
42.7398 143.4665 45.0 2140.7 8.45 Vp
42.8121 143.3923 45.0 1848.5 8.17 Vp
42.8845 143.3180 45.0 1566.8 8.46 Vp
42.9567 143.2434 45.0 1789.9 8.25 Vp
43.0290 143.1687 45.0 1593.2 7.81 Vp
43.1011 143.0939 45.0 1505.4 7.72 Vp
43.1733 143.0188 45.0 250.0 7.29 Vp
43.2453 142.9436 45.0 214.8 7.69 Vp
43.3174 142.8682 45.0 243.3 7.81 Vp
43.3893 142.7926 45.0 66.4 8.00 Vp
43.4613 142.7168 45.0 41.0 8.52 Vp
43.5331 142.6409 45.0 43.6 8.80 Vp
43.6049 142.5648 45.0 2.2 7.63 Vp
43.6767 142.4885 45.0 0.0 7.63 Vp
43.7484 142.4120 45.0 0.0 7.63 Vp
42.3316 143.9570 45.0 0.0 7.63 Vp
42.4043 143.8839 45.0 0.0 7.63 Vp
42.4769 143.8106 45.0 0.0 7.63 Vp
42.5495 143.7372 45.0 1.5 7.63 Vp
42.6220 143.6636 45.0 113.4 8.17 Vp
42.6945 143.5898 45.0 836.1 8.63 Vp
42.7670 143.5158 45.0 1695.7 8.25 Vp
42.8394 143.4416 45.0 1292.8 7.76 Vp
42.9117 143.3673 45.0 1183.6 8.14 Vp
42.9840 143.2928 45.0 1503.7 8.09 Vp
43.0563 143.2181 45.0 1046.0 7.59 Vp
43.1285 143.1433 45.0 1078.6 7.63 Vp
43.2006 143.0683 45.0 249.9 7.21 Vp
43.2728 142.9930 45.0 270.9 7.61 Vp
43.3448 142.9177 45.0 149.4 7.63 Vp
43.4168 142.8421 45.0 35.8 8.13 Vp
43.4888 142.7664 45.0 49.3 9.02 Vp
43.5607 142.6905 45.0 53.1 8.83 Vp
43.6325 142.6144 45.0 6.8 7.63 Vp
43.7043 142.5381 45.0 0.0 7.63 Vp
43.7761 142.4616 45.0 0.0 7.63 Vp
42.3586 144.0062 45.0 0.0 7.63 Vp
42.4313 143.9331 45.0 0.0 7.63 Vp
42.5040 143.8599 45.0 0.0 7.63 Vp
42.5766 143.7864 45.0 0.2 7.63 Vp
42.6492 143.7128 45.0 35.5 7.79 Vp
42.7217 143.6391 45.0 566.4 8.31 Vp
42.7942 143.5651 45.0 1375.5 8.02 Vp
42.8666 143.4910 45.0 1232.2 7.90 Vp
42.9390 143.4167 45.0 1053.9 8.10 Vp
43.0113 143.3422 45.0 1007.5 8.15 Vp
43.0836 143.2676 45.0 924.6 7.77 Vp
43.1558 143.1928 45.0 811.7 7.75 Vp
43.2280 143.1178 45.0 336.3 7.33 Vp
43.3002 143.0426 45.0 316.7 7.72 Vp
43.3722 142.9672 45.0 159.1 7.65 Vp
43.4443 142.8917 45.0 31.7 7.88 Vp
43.5163 142.8160 45.0 38.3 8.09 Vp
43.5882 142.7401 45.0 51.3 7.97 Vp
43.6601 142.6640 45.0 11.4 7.67 Vp
43.7319 142.5878 45.0 0.0 7.67 Vp
43.8037 142.5113 45.0 0.0 7.67 Vp
42.3856 144.0554 45.0 0.0 7.63 Vp
42.4583 143.9824 45.0 0.0 7.63 Vp
42.5310 143.9091 45.0 0.0 7.63 Vp
42.6036 143.8357 45.0 0.0 7.63 Vp
42.6762 143.7622 45.0 8.2 7.63 Vp
42.7488 143.6884 45.0 440.4 8.14 Vp
42.8213 143.6145 45.0 1557.3 7.81 Vp
42.8938 143.5404 45.0 1369.2 7.59 Vp
42.9662 143.4661 45.0 1231.1 7.71 Vp
43.0385 143.3917 45.0 800.5 7.08 Vp
43.1109 143.3171 45.0 992.6 7.53 Vp
43.1831 143.2423 45.0 672.0 7.38 Vp
43.2554 143.1673 45.0 261.9 7.43 Vp
43.3275 143.0921 45.0 188.2 7.20 Vp
43.3996 143.0168 45.0 179.0 7.57 Vp
43.4717 142.9413 45.0 62.4 7.75 Vp
43.5437 142.8656 45.0 8.0 7.67 Vp
43.6157 142.7897 45.0 7.9 7.67 Vp
43.6876 142.7137 45.0 2.6 7.67 Vp
43.7595 142.6375 45.0 0.0 7.67 Vp
43.8313 142.5611 45.0 0.0 7.67 Vp
42.4395 144.1540 45.0 0.0 7.63 Vp
42.5123 144.0810 45.0 0.0 7.63 Vp
42.5850 144.0078 45.0 0.0 7.63 Vp
42.6577 143.9345 45.0 0.0 7.63 Vp
42.7304 143.8610 45.0 0.7 7.63 Vp
42.8030 143.7873 45.0 324.9 8.14 Vp
42.8755 143.7134 45.0 1731.6 8.06 Vp
42.9481 143.6393 45.0 1973.6 7.86 Vp
43.0205 143.5651 45.0 987.0 7.51 Vp
43.0930 143.4907 45.0 914.0 7.35 Vp
43.1654 143.4162 45.0 1158.1 7.79 Vp
43.2377 143.3414 45.0 652.1 7.45 Vp
43.3100 143.2665 45.0 319.6 7.30 Vp
43.3822 143.1914 45.0 102.5 6.86 Vp
43.4544 143.1161 45.0 106.3 7.41 Vp
43.5265 143.0406 45.0 64.8 7.46 Vp
43.5986 142.9650 45.0 13.4 7.67 Vp
43.6706 142.8892 45.0 4.6 7.67 Vp
43.7426 142.8132 45.0 6.5 7.67 Vp
43.8145 142.7370 45.0 0.0 7.67 Vp
43.8864 142.6607 45.0 0.0 7.67 Vp
42.4932 144.2527 45.0 0.0 7.67 Vp
42.5661 144.1798 45.0 0.0 7.67 Vp
42.6389 144.1067 45.0 0.0 7.67 Vp
42.7117 144.0334 45.0 0.0 7.67 Vp
42.7844 143.9599 45.0 0.0 7.67 Vp
42.8571 143.8863 45.0 169.5 7.99 Vp
42.9297 143.8125 45.0 1472.3 8.15 Vp
43.0023 143.7385 45.0 2027.5 8.04 Vp
43.0748 143.6643 45.0 823.5 7.43 Vp
43.1473 143.5900 45.0 1239.8 7.45 Vp
43.2198 143.5154 45.0 869.7 7.37 Vp
43.2922 143.4408 45.0 325.7 7.11 Vp
43.3645 143.3659 45.0 145.5 7.27 Vp
43.4368 143.2908 45.0 94.2 7.39 Vp
43.5090 143.2156 45.0 120.1 7.37 Vp
43.5812 143.1402 45.0 46.2 7.24 Vp
43.6534 143.0646 45.0 14.0 7.67 Vp
43.7255 142.9888 45.0 9.3 7.67 Vp
43.7975 142.9129 45.0 6.2 7.67 Vp
43.8695 142.8368 45.0 0.0 7.67 Vp
43.9414 142.7605 45.0 0.0 7.67 Vp
42.5469 144.3516 45.0 0.0 7.67 Vp
42.6198 144.2787 45.0 0.0 7.67 Vp
42.6927 144.2056 45.0 0.0 7.67 Vp
42.7655 144.1324 45.0 0.0 7.67 Vp
42.8383 144.0590 45.0 0.0 7.67 Vp
42.9111 143.9854 45.0 49.4 7.96 Vp
42.9838 143.9117 45.0 740.6 8.24 Vp
43.0564 143.8378 45.0 1404.2 8.28 Vp
43.1290 143.7636 45.0 951.2 7.54 Vp
43.2016 143.6893 45.0 1382.4 7.64 Vp
43.2741 143.6149 45.0 801.4 7.79 Vp
43.3465 143.5402 45.0 257.8 7.57 Vp
43.4189 143.4654 45.0 119.0 7.59 Vp
43.4913 143.3904 45.0 69.4 7.28 Vp
43.5636 143.3152 45.0 70.5 7.10 Vp
43.6359 143.2399 45.0 26.9 7.58 Vp
43.7081 143.1644 45.0 17.9 7.67 Vp
43.7802 143.0887 45.0 21.2 7.67 Vp
43.8523 143.0128 45.0 4.6 7.67 Vp
43.9244 142.9367 45.0 0.0 7.67 Vp
43.9964 142.8604 45.0 0.0 7.67 Vp
42.6005 144.4506 45.0 0.0 7.67 Vp
42.6735 144.3778 45.0 0.0 7.67 Vp
42.7464 144.3048 45.0 0.0 7.67 Vp
42.8193 144.2316 45.0 0.0 7.67 Vp
42.8922 144.1583 45.0 0.0 7.67 Vp
42.9650 144.0848 45.0 3.5 7.67 Vp
43.0377 144.0111 45.0 116.6 7.94 Vp
43.1104 143.9372 45.0 323.7 7.79 Vp
43.1831 143.8631 45.0 376.8 7.61 Vp
43.2557 143.7889 45.0 312.1 7.53 Vp
43.3283 143.7145 45.0 437.4 7.85 Vp
43.4008 143.6399 45.0 191.1 7.50 Vp
43.4733 143.5652 45.0 120.6 7.65 Vp
43.5457 143.4902 45.0 74.4 7.55 Vp
43.6181 143.4151 45.0 28.4 7.38 Vp
43.6904 143.3398 45.0 8.8 7.67 Vp
43.7627 143.2643 45.0 6.6 7.67 Vp
43.8349 143.1886 45.0 12.9 7.67 Vp
43.9070 143.1128 45.0 2.5 7.67 Vp
43.9792 143.0368 45.0 0.0 7.67 Vp
44.0512 142.9606 45.0 0.0 7.67 Vp
42.6541 144.5499 45.0 0.0 7.67 Vp
42.7271 144.4771 45.0 0.0 7.67 Vp
42.8001 144.4041 45.0 0.0 7.67 Vp
42.8730 144.3310 45.0 0.0 7.67 Vp
42.9459 144.2577 45.0 0.0 7.67 Vp
43.0188 144.1843 45.0 0.0 7.67 Vp
43.0916 144.1106 45.0 0.0 7.67 Vp
43.1644 144.0368 45.0 0.1 7.67 Vp
43.2371 143.9628 45.0 6.0 7.67 Vp
43.3098 143.8886 45.0 0.8 7.67 Vp
43.3824 143.8143 45.0 7.5 7.67 Vp
43.4550 143.7397 45.0 27.0 7.50 Vp
43.5275 143.6650 45.0 33.1 7.53 Vp
43.6000 143.5901 45.0 39.6 7.69 Vp
43.6725 143.5151 45.0 19.6 7.67 Vp
43.7448 143.4398 45.0 0.0 7.67 Vp
43.8172 143.3644 45.0 0.0 7.67 Vp
43.8894 143.2888 45.0 0.0 7.67 Vp
43.9617 143.2130 45.0 0.0 7.67 Vp
44.0338 143.1371 45.0 0.0 7.67 Vp
44.1060 143.0609 45.0 0.0 7.67 Vp
41.0109 141.6447 50.0 0.0 7.72 Vp
41.0821 141.5704 50.0 0.0 7.72 Vp
41.1532 141.4960 50.0 0.0 7.83 Vp
41.2243 141.4214 50.0 0.0 7.78 Vp
41.2954 141.3466 50.0 0.3 7.94 Vp
41.3664 141.2716 50.0 0.4 7.80 Vp
41.4374 141.1965 50.0 0.0 8.03 Vp
41.5083 141.1213 50.0 0.0 8.02 Vp
41.5792 141.0458 50.0 0.0 7.86 Vp
41.6500 140.9702 50.0 0.0 7.89 Vp
41.7208 140.8944 50.0 0.0 7.93 Vp
41.7915 140.8185 50.0 0.0 7.84 Vp
41.8622 140.7424 50.0 0.0 7.70 Vp
41.9328 140.6661 50.0 0.0 7.52 Vp
42.0034 140.5897 50.0 0.0 7.61 Vp
42.0739 140.5131 50.0 0.0 7.60 Vp
42.1444 140.4363 50.0 0.0 7.67 Vp
42.2148 140.3593 50.0 0.0 7.66 Vp
42.2852 140.2822 50.0 0.0 7.69 Vp
42.3555 140.2050 50.0 0.0 7.56 Vp
42.4257 140.1275 50.0 0.0 7.56 Vp
41.0668 141.7392 50.0 0.0 7.72 Vp
41.1380 141.6649 50.0 0.0 7.72 Vp
41.2093 141.5905 50.0 0.0 7.73 Vp
41.2804 141.5159 50.0 0.0 7.66 Vp
41.3516 141.4412 50.0 22.8 7.59 Vp
41.4227 141.3663 50.0 111.2 7.72 Vp
41.4937 141.2912 50.0 48.7 8.01 Vp
41.5647 141.2160 50.0 11.9 8.17 Vp
41.6356 141.1406 50.0 6.3 8.00 Vp
41.7065 141.0650 50.0 2.7 8.02 Vp
41.7774 140.9893 50.0 1.4 7.89 Vp
41.8481 140.9134 50.0 0.5 7.78 Vp
41.9189 140.8373 50.0 0.0 7.72 Vp
41.9896 140.7611 50.0 0.0 7.64 Vp
42.0602 140.6847 50.0 0.0 7.72 Vp
42.1308 140.6081 50.0 0.0 7.68 Vp
42.2014 140.5314 50.0 0.0 7.68 Vp
42.2718 140.4544 50.0 0.0 7.55 Vp
42.3423 140.3773 50.0 0.0 7.37 Vp
42.4126 140.3001 50.0 0.0 7.52 Vp
42.4830 140.2227 50.0 0.0 7.58 Vp
41.1226 141.8338 50.0 0.0 7.72 Vp
41.1940 141.7596 50.0 0.0 7.68 Vp
41.2652 141.6853 50.0 0.0 7.66 Vp
41.3365 141.6107 50.0 0.0 7.57 Vp
41.4077 141.5360 50.0 16.7 7.43 Vp
41.4788 141.4612 50.0 151.3 7.59 Vp
41.5499 141.3861 50.0 168.6 7.94 Vp
41.6210 141.3109 50.0 88.2 8.10 Vp
41.6920 141.2355 50.0 105.6 8.04 Vp
41.7629 141.1600 50.0 146.4 7.87 Vp
41.8338 141.0843 50.0 60.3 7.82 Vp
41.9047 141.0085 50.0 35.8 7.80 Vp
41.9755 140.9324 50.0 3.2 7.77 Vp
42.0463 140.8562 50.0 0.3 7.86 Vp
42.1170 140.7798 50.0 0.0 7.72 Vp
42.1876 140.7033 50.0 0.0 7.67 Vp
42.2582 140.6266 50.0 0.0 7.71 Vp
42.3288 140.5497 50.0 0.0 7.63 Vp
42.3993 140.4727 50.0 0.0 7.68 Vp
42.4697 140.3954 50.0 0.0 7.59 Vp
42.5401 140.3180 50.0 0.0 7.57 Vp
41.1784 141.9286 50.0 0.0 7.72 Vp
41.2498 141.8545 50.0 0.0 7.61 Vp
41.3211 141.7802 50.0 0.0 7.56 Vp
41.3924 141.7056 50.0 0.0 7.43 Vp
41.4637 141.6310 50.0 20.0 7.43 Vp
41.5349 141.5562 50.0 26.0 7.53 Vp
41.6061 141.4812 50.0 80.1 7.90 Vp
41.6772 141.4060 50.0 125.0 7.91 Vp
41.7483 141.3307 50.0 159.4 7.90 Vp
41.8193 141.2552 50.0 384.6 7.87 Vp
41.8903 141.1795 50.0 211.8 7.82 Vp
41.9612 141.1037 50.0 123.2 7.79 Vp
42.0321 141.0277 50.0 128.0 7.86 Vp
42.1029 140.9515 50.0 16.1 7.80 Vp
42.1737 140.8752 50.0 0.2 7.67 Vp
42.2444 140.7987 50.0 0.1 7.65 Vp
42.3150 140.7220 50.0 0.0 7.69 Vp
42.3856 140.6452 50.0 0.0 7.69 Vp
42.4562 140.5681 50.0 0.0 7.64 Vp
42.5267 140.4910 50.0 0.0 7.59 Vp
42.5972 140.4136 50.0 0.0 7.61 Vp
41.2341 142.0236 50.0 0.0 7.72 Vp
41.3055 141.9495 50.0 0.0 7.56 Vp
41.3770 141.8752 50.0 0.0 7.44 Vp
41.4483 141.8008 50.0 6.7 7.49 Vp
41.5197 141.7261 50.0 48.5 7.45 Vp
41.5909 141.6514 50.0 36.9 7.61 Vp
41.6622 141.5764 50.0 104.8 7.92 Vp
41.7333 141.5013 50.0 182.1 7.92 Vp
41.8045 141.4260 50.0 193.1 7.89 Vp
41.8756 141.3505 50.0 167.4 7.99 Vp
41.9466 141.2749 50.0 216.4 7.93 Vp
42.0176 141.1991 50.0 278.8 7.88 Vp
42.0885 141.1231 50.0 382.9 7.92 Vp
42.1594 141.0470 50.0 82.7 7.73 Vp
42.2303 140.9707 50.0 4.7 7.59 Vp
42.3010 140.8942 50.0 1.5 7.60 Vp
42.3718 140.8176 50.0 0.1 7.66 Vp
42.4424 140.7408 50.0 0.0 7.58 Vp
42.5131 140.6638 50.0 0.0 7.66 Vp
42.5836 140.5866 50.0 0.0 7.63 Vp
42.6541 140.5093 50.0 0.0 7.70 Vp
41.2897 142.1188 50.0 0.0 7.72 Vp
41.3612 142.0447 50.0 0.0 7.57 Vp
41.4327 141.9705 50.0 0.0 7.49 Vp
41.5041 141.8960 50.0 19.4 7.46 Vp
41.5755 141.8215 50.0 87.0 7.48 Vp
41.6469 141.7467 50.0 147.8 7.63 Vp
41.7182 141.6718 50.0 259.6 7.93 Vp
41.7894 141.5967 50.0 248.9 7.80 Vp
41.8606 141.5215 50.0 311.2 7.93 Vp
41.9318 141.4460 50.0 170.9 8.01 Vp
42.0029 141.3705 50.0 217.2 8.00 Vp
42.0739 141.2947 50.0 494.6 7.84 Vp
42.1449 141.2188 50.0 484.5 7.71 Vp
42.2159 141.1427 50.0 249.0 7.71 Vp
42.2868 141.0664 50.0 80.3 7.54 Vp
42.3576 140.9900 50.0 44.3 7.49 Vp
42.4284 140.9134 50.0 6.2 7.57 Vp
42.4992 140.8366 50.0 0.0 7.67 Vp
42.5698 140.7596 50.0 0.0 7.75 Vp
42.6405 140.6825 50.0 0.0 7.73 Vp
42.7111 140.6052 50.0 0.0 7.79 Vp
41.3452 142.2141 50.0 0.0 7.67 Vp
41.4168 142.1401 50.0 0.0 7.56 Vp
41.4884 142.0659 50.0 0.1 7.57 Vp
41.5599 141.9915 50.0 4.9 7.50 Vp
41.6313 141.9169 50.0 26.6 7.55 Vp
41.7027 141.8422 50.0 239.0 7.53 Vp
41.7741 141.7674 50.0 258.2 7.74 Vp
41.8454 141.6923 50.0 208.6 7.70 Vp
41.9167 141.6171 50.0 295.6 7.93 Vp
41.9879 141.5417 50.0 230.2 7.98 Vp
42.0591 141.4662 50.0 327.1 7.94 Vp
42.1302 141.3905 50.0 1050.2 7.78 Vp
42.2012 141.3146 50.0 633.5 7.74 Vp
42.2723 141.2385 50.0 303.1 7.68 Vp
42.3432 141.1623 50.0 198.6 7.60 Vp
42.4141 141.0859 50.0 263.5 7.53 Vp
42.4850 141.0093 50.0 126.0 7.69 Vp
42.5558 140.9326 50.0 11.0 7.75 Vp
42.6266 140.8557 50.0 0.6 7.83 Vp
42.6973 140.7786 50.0 0.0 7.83 Vp
42.7679 140.7013 50.0 0.0 7.91 Vp
41.4007 142.3096 50.0 0.0 7.59 Vp
41.4724 142.2356 50.0 0.0 7.56 Vp
41.5440 142.1614 50.0 0.0 7.53 Vp
41.6155 142.0871 50.0 2.6 7.57 Vp
41.6871 142.0126 50.0 38.1 7.62 Vp
41.7585 141.9379 50.0 135.7 7.55 Vp
41.8299 141.8631 50.0 113.7 7.61 Vp
41.9013 141.7881 50.0 127.2 7.67 Vp
41.9727 141.7129 50.0 217.2 7.92 Vp
42.0439 141.6376 50.0 664.6 8.01 Vp
42.1152 141.5621 50.0 925.8 7.78 Vp
42.1863 141.4864 50.0 1177.2 7.82 Vp
42.2575 141.4105 50.0 536.9 7.87 Vp
42.3286 141.3345 50.0 203.1 7.70 Vp
42.3996 141.2583 50.0 211.4 7.71 Vp
42.4706 141.1820 50.0 277.5 7.69 Vp
42.5415 141.1054 50.0 219.5 7.70 Vp
42.6124 141.0287 50.0 114.5 7.69 Vp
42.6832 140.9519 50.0 36.7 7.82 Vp
42.7539 140.8748 50.0 1.6 7.92 Vp
42.8247 140.7976 50.0 0.0 7.96 Vp
41.4561 142.4052 50.0 0.0 7.60 Vp
41.5278 142.3313 50.0 0.0 7.57 Vp
41.5995 142.2572 50.0 0.8 7.52 Vp
41.6711 142.1829 50.0 54.6 7.59 Vp
41.7427 142.1084 50.0 226.8 7.63 Vp
41.8142 142.0338 50.0 263.6 7.61 Vp
41.8857 141.9590 50.0 275.4 7.57 Vp
41.9572 141.8840 50.0 256.4 7.61 Vp
42.0286 141.8089 50.0 264.9 7.87 Vp
42.0999 141.7336 50.0 838.0 8.09 Vp
42.1712 141.6582 50.0 775.9 7.87 Vp
42.2424 141.5825 50.0 695.0 8.02 Vp
42.3136 141.5067 50.0 336.7 7.82 Vp
42.3848 141.4307 50.0 277.0 7.70 Vp
42.4559 141.3546 50.0 296.3 7.77 Vp
42.5269 141.2782 50.0 394.3 7.76 Vp
42.5979 141.2017 50.0 226.5 7.70 Vp
42.6688 141.1251 50.0 141.4 7.63 Vp
42.7397 141.0482 50.0 100.9 7.72 Vp
42.8106 140.9712 50.0 18.8 7.90 Vp
42.8813 140.8940 50.0 0.0 7.64 Vp
41.5114 142.5011 50.0 0.0 7.60 Vp
41.5832 142.4272 50.0 0.0 7.59 Vp
41.6549 142.3531 50.0 14.9 7.57 Vp
41.7266 142.2788 50.0 195.7 7.61 Vp
41.7983 142.2044 50.0 386.2 7.59 Vp
41.8699 142.1299 50.0 1099.4 7.59 Vp
41.9414 142.0551 50.0 968.5 7.49 Vp
42.0129 141.9802 50.0 522.6 7.58 Vp
42.0844 141.9051 50.0 500.5 7.86 Vp
42.1558 141.8298 50.0 746.7 8.09 Vp
42.2272 141.7544 50.0 488.7 7.92 Vp
42.2985 141.6788 50.0 361.1 7.92 Vp
42.3697 141.6030 50.0 281.3 7.87 Vp
42.4409 141.5271 50.0 305.9 7.72 Vp
42.5121 141.4510 50.0 420.0 7.77 Vp
42.5832 141.3747 50.0 380.6 7.83 Vp
42.6543 141.2982 50.0 192.7 7.80 Vp
42.7253 141.2216 50.0 126.6 7.68 Vp
42.7962 141.1448 50.0 52.4 7.64 Vp
42.8671 141.0678 50.0 10.8 7.76 Vp
42.9379 140.9906 50.0 0.0 7.74 Vp
41.5667 142.5970 50.0 0.0 7.72 Vp
41.6385 142.5232 50.0 0.0 7.54 Vp
41.7103 142.4492 50.0 15.5 7.48 Vp
41.7821 142.3750 50.0 165.8 7.56 Vp
41.8538 142.3006 50.0 676.0 7.45 Vp
41.9254 142.2260 50.0 2289.8 7.56 Vp
41.9970 142.1513 50.0 1888.6 7.53 Vp
42.0686 142.0765 50.0 1104.1 7.55 Vp
42.1401 142.0014 50.0 1181.3 7.87 Vp
42.2116 141.9262 50.0 702.0 7.94 Vp
42.2830 141.8508 50.0 502.3 7.84 Vp
42.3544 141.7753 50.0 455.6 7.91 Vp
42.4257 141.6995 50.0 539.9 8.01 Vp
42.4970 141.6236 50.0 457.5 7.94 Vp
42.5682 141.5475 50.0 436.6 7.85 Vp
42.6394 141.4713 50.0 428.3 8.00 Vp
42.7105 141.3949 50.0 196.2 7.84 Vp
42.7816 141.3183 50.0 91.8 7.72 Vp
42.8526 141.2415 50.0 18.2 7.63 Vp
42.9235 141.1646 50.0 4.0 7.59 Vp
42.9945 141.0875 50.0 0.0 7.70 Vp
41.6218 142.6932 50.0 0.0 7.72 Vp
41.6937 142.6194 50.0 0.1 7.54 Vp
41.7656 142.5454 50.0 6.2 7.39 Vp
41.8374 142.4713 50.0 129.1 7.43 Vp
41.9092 142.3969 50.0 868.8 7.57 Vp
41.9809 142.3224 50.0 2920.8 7.58 Vp
42.0526 142.2478 50.0 3568.3 7.67 Vp
42.1242 142.1729 50.0 2021.5 7.50 Vp
42.1958 142.0979 50.0 1874.1 7.70 Vp
42.2673 142.0228 50.0 1028.6 7.64 Vp
42.3388 141.9474 50.0 536.9 7.91 Vp
42.4103 141.8719 50.0 545.4 7.98 Vp
42.4817 141.7962 50.0 648.2 7.98 Vp
42.5530 141.7203 50.0 640.3 8.06 Vp
42.6243 141.6443 50.0 709.8 7.95 Vp
42.6955 141.5681 50.0 590.4 7.98 Vp
42.7667 141.4917 50.0 316.0 7.83 Vp
42.8378 141.4152 50.0 101.4 7.70 Vp
42.9089 141.3384 50.0 37.0 7.61 Vp
42.9799 141.2615 50.0 4.6 7.64 Vp
43.0509 141.1845 50.0 0.0 7.68 Vp
41.6769 142.7895 50.0 0.0 7.72 Vp
41.7489 142.7158 50.0 1.8 7.58 Vp
41.8208 142.6418 50.0 60.7 7.39 Vp
41.8927 142.5677 50.0 506.1 6.78 Vp
41.9645 142.4934 50.0 3298.5 7.67 Vp
42.0363 142.4190 50.0 5138.2 7.90 Vp
42.1080 142.3444 50.0 4157.7 7.00 Vp
42.1797 142.2696 50.0 3273.5 7.82 Vp
42.2514 142.1946 50.0 2995.8 7.75 Vp
42.3230 142.1195 50.0 3594.2 8.26 Vp
42.3945 142.0442 50.0 2048.4 8.17 Vp
42.4660 141.9687 50.0 1063.9 7.94 Vp
42.5375 141.8930 50.0 1335.4 8.09 Vp
42.6089 141.8172 50.0 706.4 7.68 Vp
42.6803 141.7412 50.0 494.3 7.47 Vp
42.7516 141.6651 50.0 784.5 8.02 Vp
42.8228 141.5887 50.0 502.7 8.05 Vp
42.8940 141.5122 50.0 124.5 7.78 Vp
42.9651 141.4355 50.0 46.9 7.66 Vp
43.0362 141.3587 50.0 0.0 7.72 Vp
43.1073 141.2816 50.0 0.0 7.71 Vp
41.7319 142.8860 50.0 0.0 7.72 Vp
41.8039 142.8123 50.0 1.3 7.58 Vp
41.8759 142.7384 50.0 137.1 7.38 Vp
41.9479 142.6643 50.0 308.4 7.10 Vp
42.0198 142.5901 50.0 2640.2 7.20 Vp
42.0916 142.5157 50.0 4317.9 6.98 Vp
42.1634 142.4411 50.0 2615.4 6.99 Vp
42.2352 142.3664 50.0 1712.8 7.29 Vp
42.3069 142.2914 50.0 1493.3 7.23 Vp
42.3786 142.2164 50.0 1432.5 7.04 Vp
42.4502 142.1411 50.0 1993.1 8.34 Vp
42.5217 142.0657 50.0 1412.9 8.10 Vp
42.5933 141.9901 50.0 533.4 7.41 Vp
42.6647 141.9143 50.0 563.6 7.83 Vp
42.7361 141.8383 50.0 765.4 8.10 Vp
42.8075 141.7622 50.0 723.5 7.86 Vp
42.8788 141.6859 50.0 530.8 8.03 Vp
42.9501 141.6094 50.0 129.1 7.81 Vp
43.0213 141.5328 50.0 17.9 7.85 Vp
43.0924 141.4560 50.0 0.0 7.74 Vp
43.1635 141.3790 50.0 0.0 7.68 Vp
41.7594 142.9343 50.0 0.0 7.72 Vp
41.8314 142.8606 50.0 1.7 7.64 Vp
41.9034 142.7867 50.0 23.5 7.43 Vp
41.9754 142.7127 50.0 216.2 7.08 Vp
42.0474 142.6385 50.0 2549.6 7.25 Vp
42.1192 142.5641 50.0 3897.4 6.74 Vp
42.1911 142.4896 50.0 1964.7 6.99 Vp
42.2629 142.4148 50.0 1022.5 6.98 Vp
42.3346 142.3399 50.0 1343.5 7.57 Vp
42.4063 142.2649 50.0 1238.9 7.88 Vp
42.4780 142.1896 50.0 1444.6 8.00 Vp
42.5496 142.1142 50.0 908.0 8.15 Vp
42.6211 142.0387 50.0 443.2 8.01 Vp
42.6926 141.9629 50.0 381.9 7.93 Vp
42.7641 141.8870 50.0 463.0 7.94 Vp
42.8355 141.8109 50.0 395.3 7.66 Vp
42.9068 141.7346 50.0 188.4 7.91 Vp
42.9781 141.6581 50.0 105.3 8.13 Vp
43.0493 141.5815 50.0 13.8 7.92 Vp
43.1205 141.5047 50.0 0.0 7.75 Vp
43.1916 141.4277 50.0 0.0 7.63 Vp
41.7868 142.9827 50.0 0.0 7.72 Vp
41.8589 142.9090 50.0 1.0 7.59 Vp
41.9310 142.8351 50.0 17.2 7.41 Vp
42.0030 142.7611 50.0 213.6 6.91 Vp
42.0749 142.6869 50.0 1844.8 6.97 Vp
42.1468 142.6126 50.0 3738.2 6.82 Vp
42.2187 142.5380 50.0 2804.2 7.08 Vp
42.2905 142.4633 50.0 1761.4 6.99 Vp
42.3623 142.3885 50.0 1687.1 7.59 Vp
42.4341 142.3134 50.0 1723.0 7.95 Vp
42.5057 142.2382 50.0 1282.4 7.78 Vp
42.5774 142.1628 50.0 916.7 8.29 Vp
42.6489 142.0873 50.0 862.4 8.36 Vp
42.7205 142.0115 50.0 385.4 8.00 Vp
42.7920 141.9356 50.0 423.0 8.16 Vp
42.8634 141.8595 50.0 451.7 8.07 Vp
42.9348 141.7833 50.0 329.5 8.20 Vp
43.0061 141.7068 50.0 116.1 8.14 Vp
43.0773 141.6302 50.0 19.4 7.88 Vp
43.1486 141.5535 50.0 0.0 7.72 Vp
43.2197 141.4765 50.0 0.0 7.61 Vp
41.8142 143.0311 50.0 0.0 7.72 Vp
41.8864 142.9574 50.0 0.1 7.64 Vp
41.9585 142.8836 50.0 51.9 7.47 Vp
42.0305 142.8096 50.0 236.6 7.16 Vp
42.1025 142.7354 50.0 1044.2 7.08 Vp
42.1744 142.6611 50.0 2945.0 6.70 Vp
42.2463 142.5866 50.0 2864.5 6.84 Vp
42.3182 142.5119 50.0 2753.9 7.49 Vp
42.3900 142.4371 50.0 2675.6 7.84 Vp
42.4618 142.3620 50.0 1534.5 7.47 Vp
42.5335 142.2868 50.0 1127.9 7.76 Vp
42.6051 142.2115 50.0 755.1 7.96 Vp
42.6768 142.1359 50.0 759.4 7.56 Vp
42.7483 142.0602 50.0 623.8 8.13 Vp
42.8198 141.9843 50.0 493.9 8.39 Vp
42.8913 141.9083 50.0 540.1 8.27 Vp
42.9627 141.8320 50.0 466.5 8.25 Vp
43.0340 141.7556 50.0 93.2 7.83 Vp
43.1053 141.6790 50.0 10.5 7.69 Vp
43.1766 141.6023 50.0 0.0 7.62 Vp
43.2478 141.5253 50.0 0.0 7.57 Vp
41.8416 143.0795 50.0 0.0 7.72 Vp
41.9138 143.0058 50.0 0.0 7.60 Vp
41.9859 142.9321 50.0 29.7 7.38 Vp
42.0580 142.8581 50.0 119.7 7.07 Vp
42.1300 142.7840 50.0 749.6 6.84 Vp
42.2020 142.7096 50.0 2085.4 7.07 Vp
42.2739 142.6352 50.0 2914.3 7.22 Vp
42.3458 142.5605 50.0 3163.4 7.54 Vp
42.4177 142.4857 50.0 2654.6 7.69 Vp
42.4895 142.4107 50.0 1250.4 7.54 Vp
42.5612 142.3355 50.0 1012.6 7.50 Vp
42.6329 142.2601 50.0 1299.0 8.16 Vp
42.7045 142.1846 50.0 841.1 7.76 Vp
42.7761 142.1089 50.0 650.2 8.17 Vp
42.8477 142.0331 50.0 586.1 8.57 Vp
42.9192 141.9570 50.0 256.5 7.78 Vp
42.9906 141.8808 50.0 368.2 8.10 Vp
43.0620 141.8044 50.0 91.8 7.86 Vp
43.1333 141.7279 50.0 6.2 7.68 Vp
43.2046 141.6511 50.0 0.0 7.61 Vp
43.2758 141.5742 50.0 0.0 7.57 Vp
41.8690 143.1280 50.0 0.0 7.72 Vp
41.9412 143.0544 50.0 0.0 7.63 Vp
42.0134 142.9806 50.0 14.8 7.39 Vp
42.0855 142.9066 50.0 113.2 7.22 Vp
42.1575 142.8325 50.0 688.4 7.52 Vp
42.2295 142.7582 50.0 1872.9 7.56 Vp
42.3015 142.6838 50.0 2966.5 7.00 Vp
42.3734 142.6091 50.0 2052.8 6.58 Vp
42.4453 142.5343 50.0 1669.3 7.24 Vp
42.5171 142.4594 50.0 2141.3 8.38 Vp
42.5889 142.3842 50.0 1580.9 8.13 Vp
42.6606 142.3089 50.0 1757.2 8.19 Vp
42.7323 142.2334 50.0 610.4 7.69 Vp
42.8039 142.1577 50.0 546.5 7.82 Vp
42.8755 142.0819 50.0 593.9 7.86 Vp
42.9470 142.0059 50.0 165.5 7.52 Vp
43.0185 141.9297 50.0 336.3 8.17 Vp
43.0899 141.8533 50.0 138.7 8.10 Vp
43.1613 141.7768 50.0 25.1 7.76 Vp
43.2326 141.7000 50.0 0.0 7.54 Vp
43.3039 141.6232 50.0 0.0 7.50 Vp
41.8964 143.1765 50.0 0.0 7.72 Vp
41.9686 143.1029 50.0 0.0 7.55 Vp
42.0408 143.0291 50.0 14.7 7.55 Vp
42.1129 142.9552 50.0 139.3 7.07 Vp
42.1850 142.8811 50.0 1211.5 7.74 Vp
42.2571 142.8069 50.0 2588.4 7.52 Vp
42.3291 142.7324 50.0 2993.2 7.19 Vp
42.4010 142.6578 50.0 2267.1 6.90 Vp
42.4729 142.5830 50.0 1610.3 6.99 Vp
42.5448 142.5081 50.0 2545.6 7.76 Vp
42.6166 142.4330 50.0 2651.1 8.51 Vp
42.6884 142.3577 50.0 1625.9 8.01 Vp
42.7601 142.2822 50.0 513.3 7.50 Vp
42.8317 142.2065 50.0 489.2 7.71 Vp
42.9033 142.1307 50.0 261.4 7.28 Vp
42.9749 142.0547 50.0 86.0 7.16 Vp
43.0464 141.9786 50.0 207.5 7.64 Vp
43.1178 141.9022 50.0 140.0 7.95 Vp
43.1892 141.8257 50.0 24.3 7.55 Vp
43.2606 141.7490 50.0 0.0 7.53 Vp
43.3319 141.6721 50.0 0.0 7.50 Vp
41.9237 143.2250 50.0 0.0 7.72 Vp
41.9960 143.1515 50.0 0.0 7.67 Vp
42.0682 143.0777 50.0 15.5 7.67 Vp
42.1404 143.0038 50.0 186.1 7.07 Vp
42.2125 142.9298 50.0 1344.8 6.95 Vp
42.2846 142.8555 50.0 2082.7 6.41 Vp
42.3566 142.7811 50.0 2807.6 7.11 Vp
42.4286 142.7065 50.0 3557.0 7.40 Vp
42.5005 142.6318 50.0 3352.9 7.73 Vp
42.5724 142.5569 50.0 2300.3 7.45 Vp
42.6443 142.4818 50.0 1273.2 7.56 Vp
42.7160 142.4065 50.0 819.5 7.28 Vp
42.7878 142.3310 50.0 556.5 7.48 Vp
42.8595 142.2554 50.0 474.1 7.63 Vp
42.9311 142.1796 50.0 141.4 7.50 Vp
43.0027 142.1036 50.0 106.0 7.58 Vp
43.0742 142.0275 50.0 78.7 7.44 Vp
43.1457 141.9512 50.0 65.5 7.63 Vp
43.2172 141.8746 50.0 16.0 7.67 Vp
43.2885 141.7980 50.0 0.0 7.60 Vp
43.3598 141.7211 50.0 0.0 7.58 Vp
41.9511 143.2736 50.0 0.0 7.72 Vp
42.0234 143.2001 50.0 0.0 7.59 Vp
42.0956 143.1264 50.0 18.9 7.56 Vp
42.1678 143.0525 50.0 173.7 7.01 Vp
42.2400 142.9785 50.0 1475.5 7.12 Vp
42.3121 142.9043 50.0 3927.9 7.21 Vp
42.3841 142.8299 50.0 3359.1 6.76 Vp
42.4561 142.7553 50.0 3688.4 7.28 Vp
42.5281 142.6806 50.0 2135.5 7.01 Vp
42.6000 142.6057 50.0 1241.0 7.49 Vp
42.6719 142.5306 50.0 647.8 7.26 Vp
42.7437 142.4553 50.0 465.2 7.22 Vp
42.8155 142.3799 50.0 972.3 7.61 Vp
42.8872 142.3043 50.0 778.0 8.22 Vp
42.9589 142.2285 50.0 223.2 7.85 Vp
43.0305 142.1526 50.0 140.2 7.58 Vp
43.1021 142.0765 50.0 64.0 7.55 Vp
43.1736 142.0002 50.0 25.7 7.50 Vp
43.2450 141.9237 50.0 13.0 7.60 Vp
43.3165 141.8470 50.0 0.0 7.62 Vp
43.3878 141.7702 50.0 0.0 7.54 Vp
41.9784 143.3223 50.0 0.0 7.72 Vp
42.0507 143.2487 50.0 0.0 7.70 Vp
42.1230 143.1751 50.0 28.4 7.67 Vp
42.1952 143.1012 50.0 249.2 7.20 Vp
42.2674 143.0272 50.0 2906.3 7.41 Vp
42.3395 142.9530 50.0 6486.1 7.02 Vp
42.4116 142.8786 50.0 2553.9 6.81 Vp
42.4837 142.8041 50.0 2005.6 7.13 Vp
42.5557 142.7294 50.0 1417.1 7.58 Vp
42.6276 142.6545 50.0 700.5 7.15 Vp
42.6995 142.5795 50.0 299.3 7.07 Vp
42.7714 142.5042 50.0 271.8 7.10 Vp
42.8432 142.4288 50.0 456.7 7.15 Vp
42.9149 142.3533 50.0 307.1 7.26 Vp
42.9866 142.2775 50.0 151.6 7.33 Vp
43.0583 142.2016 50.0 104.7 7.46 Vp
43.1299 142.1255 50.0 110.9 7.42 Vp
43.2014 142.0492 50.0 66.9 7.74 Vp
43.2729 141.9727 50.0 42.8 8.10 Vp
43.3444 141.8961 50.0 0.0 7.75 Vp
43.4157 141.8193 50.0 0.0 7.74 Vp
42.0057 143.3709 50.0 0.0 7.72 Vp
42.0780 143.2975 50.0 0.0 7.59 Vp
42.1503 143.2238 50.0 20.7 7.60 Vp
42.2226 143.1500 50.0 378.5 7.54 Vp
42.2948 143.0760 50.0 3035.5 7.43 Vp
42.3670 143.0018 50.0 4774.0 7.02 Vp
42.4391 142.9275 50.0 2380.3 7.18 Vp
42.5112 142.8530 50.0 1157.9 6.62 Vp
42.5832 142.7783 50.0 999.6 6.95 Vp
42.6552 142.7034 50.0 443.8 7.00 Vp
42.7271 142.6284 50.0 333.7 7.27 Vp
42.7990 142.5532 50.0 959.6 7.93 Vp
42.8708 142.4778 50.0 788.4 8.12 Vp
42.9426 142.4023 50.0 327.3 7.80 Vp
43.0144 142.3265 50.0 242.5 7.60 Vp
43.0860 142.2506 50.0 75.0 7.45 Vp
43.1577 142.1745 50.0 88.8 7.58 Vp
43.2293 142.0983 50.0 109.6 7.80 Vp
43.3008 142.0219 50.0 20.0 7.65 Vp
43.3723 141.9452 50.0 0.0 7.78 Vp
43.4437 141.8684 50.0 0.0 7.92 Vp
42.0329 143.4197 50.0 0.0 7.72 Vp
42.1053 143.3462 50.0 0.0 7.72 Vp
42.1776 143.2726 50.0 23.0 7.65 Vp
42.2499 143.1988 50.0 321.6 7.78 Vp
42.3222 143.1248 50.0 3041.9 7.53 Vp
42.3944 143.0507 50.0 3957.8 6.83 Vp
42.4665 142.9763 50.0 1927.6 6.49 Vp
42.5387 142.9019 50.0 943.2 6.45 Vp
42.6107 142.8272 50.0 664.1 6.61 Vp
42.6827 142.7524 50.0 505.1 7.24 Vp
42.7547 142.6774 50.0 436.1 7.32 Vp
42.8266 142.6022 50.0 1076.4 7.45 Vp
42.8985 142.5268 50.0 609.5 7.80 Vp
42.9703 142.4513 50.0 663.9 8.08 Vp
43.0421 142.3756 50.0 291.4 7.50 Vp
43.1138 142.2997 50.0 125.1 7.96 Vp
43.1854 142.2236 50.0 135.7 7.72 Vp
43.2571 142.1474 50.0 100.9 7.93 Vp
43.3286 142.0710 50.0 16.3 7.70 Vp
43.4001 141.9944 50.0 0.0 7.83 Vp
43.4716 141.9176 50.0 0.0 7.88 Vp
42.0602 143.4684 50.0 0.0 7.72 Vp
42.1326 143.3950 50.0 0.0 7.72 Vp
42.2050 143.3214 50.0 20.3 7.59 Vp
42.2773 143.2476 50.0 169.8 7.24 Vp
42.3496 143.1737 50.0 1157.4 6.75 Vp
42.4218 143.0995 50.0 3262.3 7.15 Vp
42.4940 143.0253 50.0 2098.9 7.11 Vp
42.5661 142.9508 50.0 1361.5 7.10 Vp
42.6382 142.8762 50.0 1096.8 7.33 Vp
42.7103 142.8014 50.0 1070.2 7.85 Vp
42.7823 142.7264 50.0 418.6 7.16 Vp
42.8542 142.6512 50.0 374.4 6.61 Vp
42.9261 142.5759 50.0 280.6 7.06 Vp
42.9980 142.5004 50.0 477.2 7.77 Vp
43.0698 142.4247 50.0 227.1 7.81 Vp
43.1415 142.3488 50.0 171.6 8.10 Vp
43.2132 142.2728 50.0 97.8 7.78 Vp
43.2848 142.1966 50.0 38.2 7.76 Vp
43.3564 142.1202 50.0 3.7 7.73 Vp
43.4280 142.0436 50.0 0.0 7.90 Vp
43.4994 141.9669 50.0 0.0 7.91 Vp
42.0874 143.5172 50.0 0.0 7.72 Vp
42.1598 143.4438 50.0 0.0 7.72 Vp
42.2322 143.3702 50.0 18.4 7.68 Vp
42.3046 143.2965 50.0 152.5 7.39 Vp
42.3769 143.2226 50.0 701.4 6.87 Vp
42.4492 143.1485 50.0 1519.4 6.59 Vp
42.5214 143.0742 50.0 1726.4 7.35 Vp
42.5936 142.9998 50.0 961.1 7.22 Vp
42.6657 142.9252 50.0 668.5 7.48 Vp
42.7378 142.8504 50.0 1195.3 8.08 Vp
42.8098 142.7754 50.0 2423.3 8.54 Vp
42.8818 142.7003 50.0 461.8 7.33 Vp
42.9537 142.6250 50.0 201.9 7.24 Vp
43.0256 142.5495 50.0 262.1 7.66 Vp
43.0974 142.4738 50.0 209.0 7.77 Vp
43.1692 142.3980 50.0 159.0 8.14 Vp
43.2409 142.3220 50.0 98.4 7.74 Vp
43.3126 142.2458 50.0 40.7 7.86 Vp
43.3842 142.1694 50.0 2.2 7.81 Vp
43.4558 142.0929 50.0 0.0 7.86 Vp
43.5273 142.0162 50.0 0.0 7.77 Vp
42.1146 143.5661 50.0 0.0 7.72 Vp
42.1871 143.4927 50.0 0.0 7.72 Vp
42.2595 143.4191 50.0 22.7 7.67 Vp
42.3319 143.3454 50.0 85.8 7.66 Vp
42.4042 143.2715 50.0 592.3 7.37 Vp
42.4765 143.1975 50.0 957.4 6.94 Vp
42.5488 143.1232 50.0 1950.0 7.95 Vp
42.6210 143.0488 50.0 2360.8 8.20 Vp
42.6931 142.9742 50.0 2579.2 8.76 Vp
42.7653 142.8995 50.0 2798.6 8.79 Vp
42.8373 142.8245 50.0 829.5 7.31 Vp
42.9093 142.7494 50.0 343.8 7.53 Vp
42.9813 142.6741 50.0 222.3 7.69 Vp
43.0532 142.5987 50.0 391.3 7.51 Vp
43.1251 142.5230 50.0 170.1 7.38 Vp
43.1969 142.4472 50.0 134.7 7.89 Vp
43.2686 142.3712 50.0 184.2 8.09 Vp
43.3403 142.2951 50.0 92.1 8.08 Vp
43.4120 142.2187 50.0 2.8 7.82 Vp
43.4836 142.1422 50.0 0.0 7.90 Vp
43.5551 142.0655 50.0 0.0 7.73 Vp
42.1418 143.6149 50.0 0.0 7.72 Vp
42.2143 143.5416 50.0 0.0 7.72 Vp
42.2867 143.4681 50.0 3.1 7.72 Vp
42.3592 143.3944 50.0 76.3 8.02 Vp
42.4315 143.3205 50.0 1040.4 8.67 Vp
42.5039 143.2465 50.0 1599.8 7.98 Vp
42.5762 143.1723 50.0 1790.4 7.82 Vp
42.6484 143.0979 50.0 2165.3 8.14 Vp
42.7206 143.0233 50.0 2108.8 8.30 Vp
42.7927 142.9486 50.0 1186.9 8.03 Vp
42.8648 142.8737 50.0 805.9 7.83 Vp
42.9369 142.7986 50.0 787.2 7.89 Vp
43.0088 142.7233 50.0 719.1 8.08 Vp
43.0808 142.6479 50.0 326.2 7.50 Vp
43.1527 142.5723 50.0 114.7 7.41 Vp
43.2245 142.4965 50.0 130.7 7.85 Vp
43.2963 142.4205 50.0 131.8 7.99 Vp
43.3681 142.3444 50.0 86.2 7.98 Vp
43.4397 142.2680 50.0 4.5 7.76 Vp
43.5114 142.1915 50.0 0.0 7.70 Vp
43.5829 142.1149 50.0 0.0 7.72 Vp
42.1689 143.6639 50.0 0.0 7.72 Vp
42.2415 143.5905 50.0 0.0 7.72 Vp
42.3140 143.5171 50.0 8.4 7.72 Vp
42.3864 143.4434 50.0 173.9 7.85 Vp
42.4588 143.3695 50.0 1264.7 8.13 Vp
42.5312 143.2955 50.0 1847.6 8.28 Vp
42.6035 143.2213 50.0 2526.2 8.27 Vp
42.6758 143.1470 50.0 2204.2 8.33 Vp
42.7480 143.0724 50.0 1398.6 8.10 Vp
42.8202 142.9977 50.0 1009.4 7.87 Vp
42.8923 142.9228 50.0 1144.1 7.85 Vp
42.9644 142.8478 50.0 756.7 7.75 Vp
43.0364 142.7725 50.0 628.2 7.63 Vp
43.1084 142.6971 50.0 169.2 7.30 Vp
43.1803 142.6215 50.0 118.8 7.54 Vp
43.2522 142.5458 50.0 68.8 7.43 Vp
43.3240 142.4698 50.0 57.3 7.52 Vp
43.3958 142.3937 50.0 34.7 7.72 Vp
43.4675 142.3174 50.0 26.9 7.78 Vp
43.5391 142.2409 50.0 0.0 7.72 Vp
43.6107 142.1643 50.0 0.0 7.72 Vp
42.1961 143.7128 50.0 0.0 7.72 Vp
42.2686 143.6396 50.0 0.0 7.72 Vp
42.3412 143.5661 50.0 0.8 7.72 Vp
42.4137 143.4924 50.0 208.7 8.04 Vp
42.4861 143.4186 50.0 1164.5 8.25 Vp
42.5585 143.3446 50.0 2285.8 8.74 Vp
42.6308 143.2705 50.0 3620.8 8.42 Vp
42.7031 143.1961 50.0 2431.1 8.23 Vp
42.7754 143.1216 50.0 2068.1 8.46 Vp
42.8476 143.0469 50.0 2171.2 8.53 Vp
42.9197 142.9721 50.0 1200.4 7.99 Vp
42.9918 142.8970 50.0 702.0 8.01 Vp
43.0639 142.8218 50.0 579.5 8.26 Vp
43.1359 142.7464 50.0 336.9 7.68 Vp
43.2079 142.6709 50.0 184.8 7.79 Vp
43.2798 142.5951 50.0 46.4 7.45 Vp
43.3516 142.5192 50.0 41.3 7.67 Vp
43.4234 142.4431 50.0 54.8 8.01 Vp
43.4952 142.3668 50.0 46.5 7.97 Vp
43.5669 142.2904 50.0 0.0 7.72 Vp
43.6385 142.2137 50.0 0.0 7.72 Vp
42.2232 143.7619 50.0 0.0 7.72 Vp
42.2958 143.6886 50.0 0.0 7.72 Vp
42.3684 143.6151 50.0 0.0 7.72 Vp
42.4409 143.5415 50.0 121.0 8.12 Vp
42.5133 143.4677 50.0 1276.4 8.70 Vp
42.5858 143.3938 50.0 2550.4 8.72 Vp
42.6581 143.3196 50.0 2466.2 8.14 Vp
42.7305 143.2453 50.0 1813.6 7.82 Vp
42.8027 143.1708 50.0 1829.2 7.98 Vp
42.8750 143.0962 50.0 1784.4 7.98 Vp
42.9472 143.0213 50.0 958.4 7.89 Vp
43.0193 142.9463 50.0 591.9 7.78 Vp
43.0914 142.8711 50.0 770.6 8.10 Vp
43.1634 142.7958 50.0 451.1 7.98 Vp
43.2354 142.7202 50.0 151.7 7.81 Vp
43.3074 142.6445 50.0 59.1 7.79 Vp
43.3792 142.5686 50.0 47.8 7.55 Vp
43.4511 142.4925 50.0 78.1 7.79 Vp
43.5229 142.4163 50.0 14.7 7.71 Vp
43.5946 142.3399 50.0 0.0 7.72 Vp
43.6663 142.2633 50.0 0.0 7.72 Vp
42.2503 143.8109 50.0 0.0 7.72 Vp
42.3229 143.7377 50.0 0.0 7.72 Vp
42.3955 143.6642 50.0 0.0 7.72 Vp
42.4681 143.5907 50.0 89.7 7.95 Vp
42.5406 143.5169 50.0 1088.1 8.84 Vp
42.6130 143.4429 50.0 2076.0 8.57 Vp
42.6854 143.3688 50.0 1910.8 8.37 Vp
42.7578 143.2946 50.0 1769.6 8.20 Vp
42.8301 143.2201 50.0 1610.1 8.47 Vp
42.9024 143.1454 50.0 1478.5 8.02 Vp
42.9746 143.0706 50.0 1034.3 8.05 Vp
43.0467 142.9957 50.0 402.2 7.44 Vp
43.1189 142.9205 50.0 456.8 7.80 Vp
43.1909 142.8452 50.0 385.1 8.10 Vp
43.2630 142.7696 50.0 152.8 7.69 Vp
43.3349 142.6940 50.0 92.2 8.09 Vp
43.4068 142.6181 50.0 33.4 7.76 Vp
43.4787 142.5420 50.0 36.8 7.89 Vp
43.5505 142.4658 50.0 1.2 7.72 Vp
43.6223 142.3894 50.0 0.0 7.72 Vp
43.6940 142.3128 50.0 0.0 7.72 Vp
42.2774 143.8600 50.0 0.0 7.72 Vp
42.3500 143.7868 50.0 0.0 7.72 Vp
42.4226 143.7134 50.0 0.0 7.72 Vp
42.4952 143.6398 50.0 34.2 7.88 Vp
42.5677 143.5661 50.0 520.8 8.55 Vp
42.6402 143.4922 50.0 1193.0 8.27 Vp
42.7127 143.4181 50.0 1751.4 8.26 Vp
42.7851 143.3438 50.0 1712.8 8.01 Vp
42.8574 143.2694 50.0 1365.6 8.01 Vp
42.9297 143.1948 50.0 1790.4 8.16 Vp
43.0020 143.1200 50.0 1702.1 8.03 Vp
43.0742 143.0450 50.0 651.7 7.92 Vp
43.1463 142.9699 50.0 392.4 8.07 Vp
43.2184 142.8946 50.0 339.3 7.69 Vp
43.2905 142.8191 50.0 112.6 7.75 Vp
43.3625 142.7434 50.0 67.3 8.18 Vp
43.4344 142.6676 50.0 56.2 8.04 Vp
43.5063 142.5916 50.0 55.3 7.78 Vp
43.5782 142.5153 50.0 0.3 7.71 Vp
43.6499 142.4390 50.0 0.0 7.72 Vp
43.7217 142.3624 50.0 0.0 7.72 Vp
42.3044 143.9091 50.0 0.0 7.72 Vp
42.3771 143.8359 50.0 0.0 7.72 Vp
42.4498 143.7626 50.0 0.0 7.72 Vp
42.5224 143.6890 50.0 4.0 7.72 Vp
42.5949 143.6153 50.0 195.0 8.09 Vp
42.6674 143.5414 50.0 830.6 8.10 Vp
42.7399 143.4674 50.0 1834.6 8.52 Vp
42.8123 143.3932 50.0 1987.7 8.45 Vp
42.8847 143.3188 50.0 1106.6 7.99 Vp
42.9570 143.2442 50.0 1445.9 8.05 Vp
43.0293 143.1694 50.0 1866.9 8.06 Vp
43.1016 143.0945 50.0 1020.2 7.70 Vp
43.1737 143.0193 50.0 362.8 7.84 Vp
43.2459 142.9441 50.0 368.4 8.04 Vp
43.3180 142.8686 50.0 241.7 8.02 Vp
43.3900 142.7930 50.0 53.1 8.22 Vp
43.4620 142.7171 50.0 67.3 8.20 Vp
43.5339 142.6411 50.0 75.6 9.07 Vp
43.6058 142.5649 50.0 5.8 7.72 Vp
43.6776 142.4886 50.0 0.0 7.72 Vp
43.7494 142.4120 50.0 0.0 7.72 Vp
42.3314 143.9583 50.0 0.0 7.72 Vp
42.4042 143.8851 50.0 0.0 7.72 Vp
42.4769 143.8118 50.0 0.0 7.72 Vp
42.5495 143.7383 50.0 0.1 7.72 Vp
42.6221 143.6646 50.0 60.1 7.98 Vp
42.6946 143.5908 50.0 590.4 8.55 Vp
42.7671 143.5167 50.0 1541.2 8.23 Vp
42.8396 143.4425 50.0 1264.5 7.67 Vp
42.9120 143.3681 50.0 998.7 8.06 Vp
42.9844 143.2936 50.0 843.9 7.85 Vp
43.0567 143.2188 50.0 946.8 7.93 Vp
43.1289 143.1439 50.0 684.5 7.76 Vp
43.2012 143.0688 50.0 299.4 7.71 Vp
43.2733 142.9936 50.0 371.4 7.93 Vp
43.3454 142.9181 50.0 159.0 7.69 Vp
43.4175 142.8425 50.0 26.2 7.68 Vp
43.4895 142.7667 50.0 28.9 7.72 Vp
43.5615 142.6907 50.0 45.8 8.63 Vp
43.6334 142.6146 50.0 5.3 7.72 Vp
43.7052 142.5383 50.0 0.0 7.72 Vp
43.7770 142.4617 50.0 0.0 7.72 Vp
42.3585 144.0075 50.0 0.0 7.72 Vp
42.4312 143.9344 50.0 0.0 7.72 Vp
42.5039 143.8611 50.0 0.0 7.72 Vp
42.5766 143.7876 50.0 0.0 7.72 Vp
42.6492 143.7139 50.0 22.8 7.72 Vp
42.7218 143.6401 50.0 540.8 8.36 Vp
42.7943 143.5661 50.0 1409.0 8.44 Vp
42.8668 143.4919 50.0 1170.1 8.14 Vp
42.9393 143.4176 50.0 987.1 8.17 Vp
43.0117 143.3430 50.0 548.9 7.81 Vp
43.0840 143.2683 50.0 844.8 7.76 Vp
43.1563 143.1934 50.0 522.2 7.67 Vp
43.2285 143.1184 50.0 209.9 7.44 Vp
43.3007 143.0431 50.0 240.2 7.83 Vp
43.3729 142.9677 50.0 117.1 7.84 Vp
43.4450 142.8921 50.0 12.5 7.72 Vp
43.5170 142.8163 50.0 2.3 7.72 Vp
43.5890 142.7404 50.0 3.6 7.72 Vp
43.6609 142.6643 50.0 0.0 7.72 Vp
43.7328 142.5880 50.0 0.0 7.72 Vp
43.8047 142.5115 50.0 0.0 7.72 Vp
42.3854 144.0568 50.0 0.0 7.72 Vp
42.4582 143.9837 50.0 0.0 7.72 Vp
42.5310 143.9104 50.0 0.0 7.72 Vp
42.6037 143.8369 50.0 0.0 7.72 Vp
42.6763 143.7633 50.0 7.7 7.72 Vp
42.7489 143.6895 50.0 405.9 8.33 Vp
42.8215 143.6155 50.0 1272.4 8.05 Vp
42.8940 143.5414 50.0 1255.7 7.97 Vp
42.9665 143.4670 50.0 1020.7 8.00 Vp
43.0389 143.3925 50.0 811.6 7.82 Vp
43.1113 143.3178 50.0 1024.9 7.85 Vp
43.1836 143.2430 50.0 574.9 7.55 Vp
43.2559 143.1680 50.0 180.2 7.31 Vp
43.3281 143.0927 50.0 96.7 7.36 Vp
43.4003 143.0173 50.0 104.2 7.79 Vp
43.4724 142.9418 50.0 21.8 7.72 Vp
43.5445 142.8660 50.0 5.7 7.72 Vp
43.6165 142.7901 50.0 1.2 7.72 Vp
43.6885 142.7140 50.0 3.2 7.72 Vp
43.7604 142.6377 50.0 0.0 7.72 Vp
43.8323 142.5612 50.0 0.0 7.72 Vp
42.4394 144.1554 50.0 0.0 7.72 Vp
42.5122 144.0824 50.0 0.0 7.72 Vp
42.5850 144.0091 50.0 0.0 7.72 Vp
42.6578 143.9357 50.0 0.0 7.72 Vp
42.7305 143.8622 50.0 0.3 7.72 Vp
42.8032 143.7884 50.0 267.9 8.30 Vp
42.8758 143.7145 50.0 1619.0 8.34 Vp
42.9484 143.6404 50.0 1903.6 7.97 Vp
43.0209 143.5661 50.0 981.9 7.79 Vp
43.0934 143.4917 50.0 949.6 7.80 Vp
43.1658 143.4170 50.0 1092.8 7.82 Vp
43.2382 143.3422 50.0 553.7 7.49 Vp
43.3106 143.2672 50.0 174.3 7.15 Vp
43.3828 143.1921 50.0 55.8 7.19 Vp
43.4551 143.1167 50.0 73.5 7.46 Vp
43.5273 143.0412 50.0 26.5 7.25 Vp
43.5994 142.9655 50.0 7.1 7.72 Vp
43.6715 142.8896 50.0 3.9 7.72 Vp
43.7435 142.8136 50.0 5.6 7.72 Vp
43.8155 142.7374 50.0 0.0 7.72 Vp
43.8874 142.6609 50.0 0.0 7.72 Vp
42.4932 144.2542 50.0 0.0 7.72 Vp
42.5661 144.1812 50.0 0.0 7.72 Vp
42.6390 144.1080 50.0 0.0 7.72 Vp
42.7118 144.0347 50.0 0.0 7.72 Vp
42.7846 143.9612 50.0 0.0 7.72 Vp
42.8573 143.8875 50.0 110.2 8.01 Vp
42.9300 143.8136 50.0 1218.0 8.24 Vp
43.0026 143.7396 50.0 2185.4 8.29 Vp
43.0752 143.6654 50.0 1139.2 7.95 Vp
43.1478 143.5910 50.0 1396.4 7.88 Vp
43.2203 143.5164 50.0 900.7 7.70 Vp
43.2927 143.4416 50.0 333.5 7.35 Vp
43.3651 143.3667 50.0 141.7 7.42 Vp
43.4375 143.2916 50.0 149.6 7.71 Vp
43.5098 143.2163 50.0 94.7 7.37 Vp
43.5820 143.1408 50.0 26.5 7.48 Vp
43.6542 143.0652 50.0 8.3 7.72 Vp
43.7264 142.9893 50.0 9.8 7.72 Vp
43.7985 142.9133 50.0 4.8 7.72 Vp
43.8705 142.8372 50.0 0.0 7.72 Vp
43.9425 142.7608 50.0 0.0 7.72 Vp
42.5469 144.3532 50.0 0.0 7.72 Vp
42.6199 144.2802 50.0 0.0 7.72 Vp
42.6928 144.2071 50.0 0.0 7.72 Vp
42.7657 144.1338 50.0 0.0 7.72 Vp
42.8385 144.0604 50.0 0.0 7.72 Vp
42.9113 143.9867 50.0 35.7 8.02 Vp
42.9841 143.9129 50.0 579.8 8.30 Vp
43.0568 143.8389 50.0 1390.7 8.41 Vp
43.1295 143.7648 50.0 874.8 7.74 Vp
43.2021 143.6904 50.0 1135.0 7.92 Vp
43.2746 143.6159 50.0 728.3 8.10 Vp
43.3471 143.5412 50.0 249.5 7.89 Vp
43.4196 143.4663 50.0 87.1 7.58 Vp
43.4920 143.3913 50.0 72.8 7.55 Vp
43.5644 143.3160 50.0 37.2 7.07 Vp
43.6367 143.2406 50.0 19.6 7.72 Vp
43.7090 143.1650 50.0 9.3 7.72 Vp
43.7812 143.0892 50.0 18.6 7.72 Vp
43.8533 143.0133 50.0 2.9 7.72 Vp
43.9254 142.9372 50.0 0.0 7.72 Vp
43.9975 142.8609 50.0 0.0 7.72 Vp
42.6006 144.4523 50.0 0.0 7.72 Vp
42.6736 144.3794 50.0 0.0 7.72 Vp
42.7466 144.3064 50.0 0.0 7.72 Vp
42.8195 144.2332 50.0 0.0 7.72 Vp
42.8924 144.1597 50.0 0.0 7.72 Vp
42.9653 144.0862 50.0 1.8 7.72 Vp
43.0381 144.0124 50.0 69.1 8.06 Vp
43.1109 143.9385 50.0 263.6 7.91 Vp
43.1836 143.8644 50.0 305.3 7.79 Vp
43.2563 143.7901 50.0 271.8 7.73 Vp
43.3289 143.7156 50.0 333.7 7.82 Vp
43.4015 143.6410 50.0 148.1 7.72 Vp
43.4740 143.5661 50.0 105.6 7.68 Vp
43.5465 143.4911 50.0 56.7 7.70 Vp
43.6189 143.4160 50.0 27.6 7.66 Vp
43.6913 143.3406 50.0 6.9 7.72 Vp
43.7636 143.2650 50.0 4.6 7.72 Vp
43.8359 143.1893 50.0 12.0 7.72 Vp
43.9081 143.1134 50.0 1.9 7.72 Vp
43.9803 143.0373 50.0 0.0 7.72 Vp
44.0524 142.9611 50.0 0.0 7.72 Vp
42.6541 144.5516 50.0 0.0 7.72 Vp
42.7272 144.4788 50.0 0.0 7.72 Vp
42.8003 144.4058 50.0 0.0 7.72 Vp
42.8733 144.3326 50.0 0.0 7.72 Vp
42.9462 144.2593 50.0 0.0 7.72 Vp
43.0192 144.1857 50.0 0.0 7.72 Vp
43.0920 144.1120 50.0 0.0 7.72 Vp
43.1649 144.0382 50.0 0.0 7.72 Vp
43.2376 143.9641 50.0 4.3 7.72 Vp
43.3104 143.8899 50.0 0.6 7.72 Vp
43.3831 143.8155 50.0 5.5 7.72 Vp
43.4557 143.7409 50.0 22.1 7.58 Vp
43.5283 143.6661 50.0 29.4 7.69 Vp
43.6008 143.5912 50.0 30.5 7.86 Vp
43.6733 143.5161 50.0 17.7 7.72 Vp
43.7458 143.4407 50.0 0.0 7.72 Vp
43.8182 143.3652 50.0 0.0 7.72 Vp
43.8905 143.2896 50.0 0.0 7.72 Vp
43.9628 143.2137 50.0 0.0 7.72 Vp
44.0350 143.1377 50.0 0.0 7.72 Vp
44.1072 143.0615 50.0 0.0 7.72 Vp
41.0096 141.6441 55.0 0.0 7.78 Vp
41.0809 141.5698 55.0 0.0 7.78 Vp
41.1521 141.4953 55.0 0.0 7.83 Vp
41.2233 141.4206 55.0 0.0 7.85 Vp
41.2944 141.3458 55.0 0.1 7.98 Vp
41.3655 141.2708 55.0 0.2 7.87 Vp
41.4365 141.1956 55.0 0.0 8.07 Vp
41.5075 141.1203 55.0 0.0 7.99 Vp
41.5784 141.0448 55.0 0.0 7.79 Vp
41.6493 140.9691 55.0 0.0 7.82 Vp
41.7201 140.8933 55.0 0.0 7.80 Vp
41.7909 140.8173 55.0 0.0 7.72 Vp
41.8616 140.7412 55.0 0.0 7.74 Vp
41.9323 140.6648 55.0 0.0 7.62 Vp
42.0029 140.5883 55.0 0.0 7.64 Vp
42.0735 140.5117 55.0 0.0 7.65 Vp
42.1441 140.4348 55.0 0.0 7.65 Vp
42.2145 140.3578 55.0 0.0 7.69 Vp
42.2849 140.2806 55.0 0.0 7.76 Vp
42.3553 140.2033 55.0 0.0 7.65 Vp
42.4256 140.1258 55.0 0.0 7.71 Vp
41.0656 141.7387 55.0 0.0 7.78 Vp
41.1369 141.6644 55.0 0.0 7.78 Vp
41.2082 141.5900 55.0 0.0 7.80 Vp
41.2794 141.5153 55.0 0.0 7.74 Vp
41.3506 141.4405 55.0 16.1 7.62 Vp
41.4217 141.3656 55.0 75.9 7.76 Vp
41.4928 141.2904 55.0 40.0 8.09 Vp
41.5639 141.2151 55.0 15.0 8.14 Vp
41.6349 141.1397 55.0 5.0 7.82 Vp
41.7058 141.0640 55.0 1.9 7.74 Vp
41.7767 140.9883 55.0 0.8 7.67 Vp
41.8476 140.9123 55.0 0.4 7.63 Vp
41.9184 140.8362 55.0 0.0 7.68 Vp
41.9891 140.7598 55.0 0.0 7.65 Vp
42.0598 140.6834 55.0 0.0 7.62 Vp
42.1305 140.6067 55.0 0.0 7.63 Vp
42.2011 140.5299 55.0 0.0 7.64 Vp
42.2716 140.4530 55.0 0.0 7.58 Vp
42.3421 140.3758 55.0 0.0 7.65 Vp
42.4125 140.2985 55.0 0.0 7.67 Vp
42.4829 140.2210 55.0 0.0 7.72 Vp
41.1215 141.8334 55.0 0.0 7.78 Vp
41.1929 141.7592 55.0 0.0 7.78 Vp
41.2642 141.6848 55.0 0.0 7.74 Vp
41.3355 141.6102 55.0 0.0 7.60 Vp
41.4068 141.5354 55.0 14.1 7.44 Vp
41.4780 141.4605 55.0 154.1 7.80 Vp
41.5491 141.3854 55.0 161.1 8.14 Vp
41.6202 141.3101 55.0 103.3 8.12 Vp
41.6913 141.2347 55.0 109.3 7.78 Vp
41.7623 141.1591 55.0 106.8 7.70 Vp
41.8333 141.0833 55.0 42.2 7.62 Vp
41.9042 141.0074 55.0 27.7 7.65 Vp
41.9750 140.9313 55.0 1.8 7.61 Vp
42.0459 140.8551 55.0 0.3 7.66 Vp
42.1166 140.7786 55.0 0.0 7.60 Vp
42.1873 140.7020 55.0 0.0 7.61 Vp
42.2580 140.6252 55.0 0.0 7.67 Vp
42.3286 140.5483 55.0 0.0 7.67 Vp
42.3991 140.4712 55.0 0.0 7.72 Vp
42.4696 140.3939 55.0 0.0 7.71 Vp
42.5401 140.3165 55.0 0.0 7.70 Vp
41.1773 141.9283 55.0 0.0 7.78 Vp
41.2487 141.8541 55.0 0.0 7.69 Vp
41.3202 141.7797 55.0 0.0 7.59 Vp
41.3915 141.7052 55.0 0.0 7.38 Vp
41.4628 141.6304 55.0 14.5 7.36 Vp
41.5341 141.5556 55.0 18.7 7.72 Vp
41.6053 141.4805 55.0 73.8 8.12 Vp
41.6765 141.4053 55.0 125.1 8.02 Vp
41.7476 141.3299 55.0 218.1 7.84 Vp
41.8187 141.2543 55.0 360.7 7.83 Vp
41.8897 141.1786 55.0 167.3 7.72 Vp
41.9607 141.1027 55.0 99.2 7.63 Vp
42.0316 141.0267 55.0 86.2 7.67 Vp
42.1025 140.9504 55.0 16.0 7.71 Vp
42.1733 140.8741 55.0 0.0 7.62 Vp
42.2441 140.7975 55.0 0.0 7.62 Vp
42.3148 140.7207 55.0 0.0 7.69 Vp
42.3855 140.6438 55.0 0.0 7.72 Vp
42.4561 140.5667 55.0 0.0 7.69 Vp
42.5267 140.4895 55.0 0.0 7.70 Vp
42.5972 140.4121 55.0 0.0 7.70 Vp
41.2330 142.0234 55.0 0.0 7.78 Vp
41.3046 141.9492 55.0 0.0 7.58 Vp
41.3760 141.8749 55.0 0.0 7.38 Vp
41.4474 141.8003 55.0 1.1 7.55 Vp
41.5188 141.7257 55.0 20.9 7.43 Vp
41.5902 141.6508 55.0 39.2 7.60 Vp
41.6614 141.5758 55.0 65.7 7.89 Vp
41.7327 141.5006 55.0 112.5 7.84 Vp
41.8039 141.4253 55.0 120.1 7.78 Vp
41.8750 141.3498 55.0 196.4 7.88 Vp
41.9461 141.2741 55.0 237.9 7.81 Vp
42.0172 141.1982 55.0 230.6 7.70 Vp
42.0882 141.1222 55.0 340.2 7.71 Vp
42.1591 141.0460 55.0 102.9 7.62 Vp
42.2300 140.9696 55.0 3.3 7.51 Vp
42.3008 140.8931 55.0 1.1 7.58 Vp
42.3716 140.8164 55.0 0.1 7.66 Vp
42.4423 140.7395 55.0 0.0 7.65 Vp
42.5130 140.6625 55.0 0.0 7.74 Vp
42.5836 140.5853 55.0 0.0 7.72 Vp
42.6542 140.5079 55.0 0.0 7.74 Vp
41.2887 142.1186 55.0 0.0 7.75 Vp
41.3603 142.0445 55.0 0.0 7.59 Vp
41.4318 141.9702 55.0 0.0 7.33 Vp
41.5033 141.8957 55.0 20.8 7.47 Vp
41.5747 141.8210 55.0 105.1 7.71 Vp
41.6461 141.7462 55.0 178.8 7.63 Vp
41.7175 141.6713 55.0 99.9 7.73 Vp
41.7888 141.5961 55.0 229.7 7.84 Vp
41.8601 141.5208 55.0 286.9 7.92 Vp
41.9313 141.4454 55.0 211.2 7.87 Vp
42.0024 141.3697 55.0 225.9 7.78 Vp
42.0735 141.2939 55.0 338.0 7.74 Vp
42.1446 141.2179 55.0 453.4 7.68 Vp
42.2156 141.1417 55.0 261.8 7.64 Vp
42.2866 141.0654 55.0 57.3 7.43 Vp
42.3575 140.9889 55.0 40.5 7.49 Vp
42.4283 140.9122 55.0 5.8 7.64 Vp
42.4991 140.8354 55.0 0.1 7.72 Vp
42.5698 140.7584 55.0 0.0 7.79 Vp
42.6405 140.6812 55.0 0.0 7.78 Vp
42.7112 140.6039 55.0 0.0 7.81 Vp
41.3443 142.2140 55.0 0.0 7.72 Vp
41.4159 142.1399 55.0 0.0 7.61 Vp
41.4875 142.0656 55.0 0.3 7.66 Vp
41.5591 141.9912 55.0 18.6 7.74 Vp
41.6306 141.9166 55.0 143.7 7.89 Vp
41.7021 141.8419 55.0 238.7 7.81 Vp
41.7735 141.7669 55.0 305.7 7.79 Vp
41.8448 141.6918 55.0 337.0 7.74 Vp
41.9162 141.6165 55.0 222.1 7.86 Vp
41.9874 141.5411 55.0 165.6 7.83 Vp
42.0587 141.4655 55.0 219.4 7.74 Vp
42.1298 141.3897 55.0 607.9 7.67 Vp
42.2010 141.3138 55.0 557.2 7.69 Vp
42.2720 141.2376 55.0 277.4 7.58 Vp
42.3430 141.1613 55.0 143.8 7.46 Vp
42.4140 141.0849 55.0 237.2 7.53 Vp
42.4849 141.0083 55.0 113.2 7.61 Vp
42.5558 140.9315 55.0 11.8 7.74 Vp
42.6266 140.8545 55.0 0.3 7.82 Vp
42.6974 140.7773 55.0 0.0 7.84 Vp
42.7681 140.7000 55.0 0.0 7.94 Vp
41.3998 142.3096 55.0 0.0 7.73 Vp
41.4715 142.2355 55.0 0.0 7.67 Vp
41.5432 142.1613 55.0 1.0 7.67 Vp
41.6148 142.0869 55.0 81.8 7.78 Vp
41.6864 142.0124 55.0 293.2 7.84 Vp
41.7579 141.9376 55.0 364.2 7.91 Vp
41.8294 141.8627 55.0 377.9 7.88 Vp
41.9008 141.7877 55.0 283.1 7.72 Vp
41.9722 141.7124 55.0 229.7 7.80 Vp
42.0435 141.6370 55.0 215.7 7.81 Vp
42.1148 141.5615 55.0 366.1 7.71 Vp
42.1861 141.4857 55.0 884.8 7.73 Vp
42.2572 141.4098 55.0 697.4 7.80 Vp
42.3284 141.3337 55.0 224.5 7.59 Vp
42.3995 141.2575 55.0 183.2 7.56 Vp
42.4705 141.1811 55.0 227.6 7.58 Vp
42.5415 141.1045 55.0 190.8 7.60 Vp
42.6124 141.0277 55.0 100.7 7.67 Vp
42.6833 140.9507 55.0 29.1 7.80 Vp
42.7541 140.8736 55.0 1.2 7.93 Vp
42.8249 140.7964 55.0 0.0 8.04 Vp
41.4552 142.4053 55.0 0.0 7.72 Vp
41.5270 142.3313 55.0 0.0 7.68 Vp
41.5987 142.2571 55.0 2.6 7.75 Vp
41.6704 142.1828 55.0 173.8 7.73 Vp
41.7421 142.1082 55.0 371.3 7.62 Vp
41.8136 142.0336 55.0 560.6 7.86 Vp
41.8852 141.9587 55.0 384.0 7.56 Vp
41.9567 141.8837 55.0 320.2 7.65 Vp
42.0281 141.8085 55.0 355.3 7.86 Vp
42.0995 141.7332 55.0 869.4 7.89 Vp
42.1709 141.6576 55.0 924.2 7.76 Vp
42.2422 141.5819 55.0 950.3 7.96 Vp
42.3134 141.5060 55.0 491.6 7.84 Vp
42.3846 141.4300 55.0 254.6 7.71 Vp
42.4558 141.3538 55.0 240.2 7.76 Vp
42.5269 141.2774 55.0 346.9 7.91 Vp
42.5979 141.2009 55.0 197.3 7.68 Vp
42.6689 141.1241 55.0 121.9 7.60 Vp
42.7399 141.0472 55.0 84.4 7.74 Vp
42.8107 140.9701 55.0 15.1 7.98 Vp
42.8816 140.8929 55.0 0.0 7.67 Vp
41.5106 142.5012 55.0 0.0 7.69 Vp
41.5824 142.4272 55.0 0.0 7.59 Vp
41.6542 142.3531 55.0 2.6 7.55 Vp
41.7260 142.2788 55.0 109.9 7.53 Vp
41.7977 142.2043 55.0 231.6 7.32 Vp
41.8693 142.1297 55.0 708.3 7.55 Vp
41.9409 142.0549 55.0 596.9 7.38 Vp
42.0125 141.9799 55.0 397.6 7.50 Vp
42.0840 141.9047 55.0 484.2 7.96 Vp
42.1555 141.8294 55.0 748.2 8.13 Vp
42.2269 141.7539 55.0 556.5 8.18 Vp
42.2983 141.6783 55.0 629.1 7.99 Vp
42.3696 141.6024 55.0 367.6 7.92 Vp
42.4408 141.5264 55.0 296.3 7.84 Vp
42.5121 141.4503 55.0 378.1 7.93 Vp
42.5832 141.3739 55.0 349.6 7.93 Vp
42.6543 141.2974 55.0 209.8 7.80 Vp
42.7254 141.2207 55.0 98.5 7.63 Vp
42.7964 141.1438 55.0 45.2 7.66 Vp
42.8673 141.0668 55.0 9.3 7.85 Vp
42.9382 140.9896 55.0 0.0 7.78 Vp
41.5659 142.5972 55.0 0.0 7.78 Vp
41.6378 142.5233 55.0 0.0 7.66 Vp
41.7096 142.4492 55.0 0.3 7.41 Vp
41.7814 142.3750 55.0 24.4 7.27 Vp
41.8532 142.3006 55.0 200.0 7.25 Vp
41.9249 142.2260 55.0 1157.3 7.44 Vp
41.9966 142.1512 55.0 1108.2 7.44 Vp
42.0682 142.0762 55.0 769.7 7.37 Vp
42.1398 142.0011 55.0 860.8 7.93 Vp
42.2113 141.9259 55.0 649.5 8.18 Vp
42.2828 141.8504 55.0 349.3 7.89 Vp
42.3542 141.7748 55.0 411.8 7.96 Vp
42.4256 141.6990 55.0 522.7 8.03 Vp
42.4969 141.6231 55.0 429.1 8.01 Vp
42.5682 141.5469 55.0 409.8 7.94 Vp
42.6395 141.4706 55.0 367.0 8.03 Vp
42.7106 141.3941 55.0 215.1 7.89 Vp
42.7817 141.3175 55.0 94.8 7.72 Vp
42.8528 141.2406 55.0 18.4 7.65 Vp
42.9238 141.1637 55.0 4.9 7.60 Vp
42.9948 141.0865 55.0 0.0 7.69 Vp
41.6211 142.6935 55.0 0.0 7.78 Vp
41.6930 142.6196 55.0 0.2 7.68 Vp
41.7650 142.5456 55.0 10.6 7.47 Vp
41.8368 142.4714 55.0 23.0 7.26 Vp
41.9087 142.3970 55.0 642.3 7.45 Vp
41.9804 142.3224 55.0 3427.9 7.62 Vp
42.0522 142.2477 55.0 2771.3 7.63 Vp
42.1239 142.1728 55.0 1400.6 7.44 Vp
42.1955 142.0977 55.0 1137.6 7.65 Vp
42.2671 142.0225 55.0 1039.0 7.70 Vp
42.3386 141.9471 55.0 752.1 7.96 Vp
42.4101 141.8715 55.0 421.1 7.99 Vp
42.4816 141.7958 55.0 606.2 8.03 Vp
42.5530 141.7198 55.0 710.2 8.12 Vp
42.6243 141.6438 55.0 742.1 8.08 Vp
42.6956 141.5675 55.0 536.6 8.01 Vp
42.7669 141.4910 55.0 288.7 7.92 Vp
42.8380 141.4144 55.0 80.4 7.76 Vp
42.9092 141.3376 55.0 22.8 7.61 Vp
42.9803 141.2607 55.0 2.5 7.66 Vp
43.0513 141.1835 55.0 0.0 7.71 Vp
41.6762 142.7899 55.0 0.0 7.78 Vp
41.7482 142.7160 55.0 0.2 7.76 Vp
41.8202 142.6421 55.0 110.7 7.71 Vp
41.8921 142.5679 55.0 209.9 6.66 Vp
41.9640 142.4935 55.0 2073.0 7.03 Vp
42.0359 142.4190 55.0 3833.3 7.61 Vp
42.1077 142.3444 55.0 2762.0 7.52 Vp
42.1794 142.2695 55.0 2137.8 7.87 Vp
42.2511 142.1945 55.0 1305.6 7.44 Vp
42.3228 142.1193 55.0 1163.1 7.33 Vp
42.3944 142.0439 55.0 1939.2 8.49 Vp
42.4660 141.9684 55.0 783.9 8.17 Vp
42.5375 141.8927 55.0 486.5 7.68 Vp
42.6089 141.8168 55.0 773.2 8.07 Vp
42.6803 141.7408 55.0 585.6 7.62 Vp
42.7517 141.6645 55.0 589.6 7.66 Vp
42.8230 141.5881 55.0 333.9 7.85 Vp
42.8943 141.5116 55.0 124.1 8.11 Vp
42.9655 141.4348 55.0 54.2 8.24 Vp
43.0366 141.3579 55.0 0.4 7.70 Vp
43.1077 141.2808 55.0 0.0 7.72 Vp
41.7312 142.8864 55.0 0.0 7.78 Vp
41.8033 142.8127 55.0 0.1 7.74 Vp
41.8754 142.7387 55.0 63.4 7.88 Vp
41.9474 142.6646 55.0 115.1 7.40 Vp
42.0193 142.5903 55.0 1809.3 7.29 Vp
42.0912 142.5158 55.0 5282.0 7.43 Vp
42.1631 142.4412 55.0 2862.6 7.52 Vp
42.2349 142.3664 55.0 1940.2 7.86 Vp
42.3067 142.2914 55.0 843.5 7.66 Vp
42.3784 142.2163 55.0 450.3 7.21 Vp
42.4501 142.1409 55.0 968.1 7.50 Vp
42.5217 142.0655 55.0 616.4 7.28 Vp
42.5933 141.9898 55.0 357.1 7.52 Vp
42.6648 141.9140 55.0 471.6 7.71 Vp
42.7363 141.8380 55.0 560.2 7.81 Vp
42.8077 141.7618 55.0 867.6 8.38 Vp
42.8791 141.6854 55.0 448.0 8.08 Vp
42.9504 141.6089 55.0 126.7 7.95 Vp
43.0216 141.5322 55.0 18.7 7.85 Vp
43.0928 141.4553 55.0 0.0 7.71 Vp
43.1640 141.3782 55.0 0.0 7.70 Vp
41.7587 142.9348 55.0 0.0 7.78 Vp
41.8308 142.8610 55.0 0.0 7.70 Vp
41.9029 142.7871 55.0 7.4 7.57 Vp
41.9750 142.7130 55.0 61.6 7.68 Vp
42.0469 142.6387 55.0 1478.0 6.91 Vp
42.1189 142.5643 55.0 4160.7 7.15 Vp
42.1908 142.4897 55.0 1957.6 7.10 Vp
42.2626 142.4149 55.0 1283.8 7.47 Vp
42.3344 142.3399 55.0 936.1 7.38 Vp
42.4062 142.2648 55.0 698.0 7.41 Vp
42.4779 142.1895 55.0 629.7 7.50 Vp
42.5496 142.1141 55.0 423.3 7.89 Vp
42.6212 142.0384 55.0 441.1 7.83 Vp
42.6927 141.9626 55.0 601.2 8.14 Vp
42.7642 141.8866 55.0 374.3 7.97 Vp
42.8357 141.8104 55.0 353.6 7.64 Vp
42.9071 141.7341 55.0 180.5 7.81 Vp
42.9784 141.6576 55.0 102.6 7.97 Vp
43.0497 141.5809 55.0 14.4 8.04 Vp
43.1209 141.5040 55.0 0.0 7.79 Vp
43.1921 141.4270 55.0 0.0 7.67 Vp
41.7862 142.9832 55.0 0.0 7.78 Vp
41.8583 142.9094 55.0 0.0 7.66 Vp
41.9305 142.8355 55.0 2.0 7.63 Vp
42.0025 142.7615 55.0 99.7 7.33 Vp
42.0745 142.6872 55.0 684.5 7.03 Vp
42.1465 142.6128 55.0 2265.2 6.95 Vp
42.2184 142.5382 55.0 2104.7 7.48 Vp
42.2903 142.4634 55.0 1132.4 7.44 Vp
42.3622 142.3885 55.0 902.7 7.36 Vp
42.4339 142.3134 55.0 810.0 7.40 Vp
42.5057 142.2381 55.0 771.5 7.73 Vp
42.5774 142.1627 55.0 699.2 8.17 Vp
42.6490 142.0871 55.0 664.0 7.97 Vp
42.7206 142.0113 55.0 633.4 7.91 Vp
42.7921 141.9353 55.0 552.9 8.22 Vp
42.8636 141.8592 55.0 413.7 8.02 Vp
42.9351 141.7828 55.0 301.9 8.30 Vp
43.0064 141.7064 55.0 95.0 8.19 Vp
43.0778 141.6297 55.0 15.5 7.97 Vp
43.1490 141.5528 55.0 0.0 7.74 Vp
43.2202 141.4758 55.0 0.0 7.68 Vp
41.8136 143.0316 55.0 0.0 7.78 Vp
41.8858 142.9579 55.0 0.0 7.70 Vp
41.9580 142.8840 55.0 0.0 7.45 Vp
42.0301 142.8100 55.0 54.5 7.26 Vp
42.1021 142.7357 55.0 272.4 6.66 Vp
42.1741 142.6613 55.0 933.4 6.45 Vp
42.2461 142.5868 55.0 1735.4 7.32 Vp
42.3180 142.5120 55.0 1352.7 7.22 Vp
42.3899 142.4371 55.0 1090.4 7.31 Vp
42.4617 142.3621 55.0 795.1 7.57 Vp
42.5335 142.2868 55.0 1028.6 7.87 Vp
42.6052 142.2114 55.0 943.8 8.15 Vp
42.6768 142.1358 55.0 711.1 7.89 Vp
42.7485 142.0600 55.0 569.6 8.04 Vp
42.8200 141.9841 55.0 676.8 8.01 Vp
42.8915 141.9079 55.0 534.3 8.08 Vp
42.9630 141.8316 55.0 404.5 8.31 Vp
43.0344 141.7552 55.0 94.6 7.98 Vp
43.1058 141.6785 55.0 6.4 7.92 Vp
43.1771 141.6017 55.0 0.0 7.74 Vp
43.2483 141.5247 55.0 0.0 7.64 Vp
41.8411 143.0801 55.0 0.0 7.78 Vp
41.9133 143.0064 55.0 0.0 7.65 Vp
41.9855 142.9325 55.0 0.2 7.31 Vp
42.0576 142.8585 55.0 26.6 7.28 Vp
42.1297 142.7843 55.0 157.6 6.52 Vp
42.2017 142.7099 55.0 602.0 6.62 Vp
42.2737 142.6354 55.0 1376.3 6.94 Vp
42.3457 142.5607 55.0 1438.5 7.45 Vp
42.4176 142.4858 55.0 912.1 7.29 Vp
42.4894 142.4107 55.0 602.7 7.30 Vp
42.5612 142.3355 55.0 800.2 7.60 Vp
42.6330 142.2601 55.0 1083.0 7.99 Vp
42.7047 142.1845 55.0 538.3 7.44 Vp
42.7763 142.1088 55.0 444.1 7.62 Vp
42.8479 142.0328 55.0 363.2 7.40 Vp
42.9195 141.9567 55.0 228.3 7.36 Vp
42.9909 141.8805 55.0 330.1 8.10 Vp
43.0624 141.8040 55.0 67.7 7.86 Vp
43.1338 141.7274 55.0 5.8 7.88 Vp
43.2051 141.6506 55.0 0.0 7.71 Vp
43.2764 141.5736 55.0 0.0 7.65 Vp
41.8685 143.1286 55.0 0.0 7.78 Vp
41.9407 143.0549 55.0 0.0 7.73 Vp
42.0129 142.9811 55.0 2.7 7.46 Vp
42.0851 142.9071 55.0 42.0 7.56 Vp
42.1572 142.8329 55.0 204.5 7.20 Vp
42.2293 142.7586 55.0 786.3 6.93 Vp
42.3013 142.6841 55.0 1489.3 7.28 Vp
42.3733 142.6093 55.0 928.1 6.66 Vp
42.4452 142.5345 55.0 511.6 6.86 Vp
42.5171 142.4595 55.0 687.8 7.11 Vp
42.5889 142.3843 55.0 568.5 7.09 Vp
42.6607 142.3089 55.0 758.5 7.64 Vp
42.7324 142.2333 55.0 430.9 7.41 Vp
42.8041 142.1576 55.0 575.6 7.50 Vp
42.8758 142.0817 55.0 469.5 7.64 Vp
42.9473 142.0056 55.0 136.2 7.43 Vp
43.0189 141.9294 55.0 360.0 8.35 Vp
43.0903 141.8529 55.0 97.3 8.07 Vp
43.1618 141.7763 55.0 22.5 7.81 Vp
43.2331 141.6995 55.0 0.0 7.69 Vp
43.3044 141.6226 55.0 0.0 7.59 Vp
41.8959 143.1771 55.0 0.0 7.78 Vp
41.9682 143.1035 55.0 0.0 7.66 Vp
42.0404 143.0297 55.0 6.6 7.61 Vp
42.1126 142.9557 55.0 68.8 7.36 Vp
42.1847 142.8815 55.0 409.7 7.36 Vp
42.2568 142.8072 55.0 1470.2 7.77 Vp
42.3289 142.7327 55.0 1921.8 7.45 Vp
42.4009 142.6581 55.0 1053.8 7.11 Vp
42.4729 142.5832 55.0 603.6 6.74 Vp
42.5448 142.5082 55.0 587.6 6.90 Vp
42.6166 142.4330 55.0 768.2 7.10 Vp
42.6885 142.3577 55.0 1087.1 7.82 Vp
42.7602 142.2822 55.0 502.9 7.36 Vp
42.8319 142.2064 55.0 583.3 7.80 Vp
42.9036 142.1306 55.0 220.1 7.30 Vp
42.9752 142.0545 55.0 67.8 7.32 Vp
43.0468 141.9783 55.0 223.6 7.78 Vp
43.1183 141.9019 55.0 99.9 7.92 Vp
43.1897 141.8253 55.0 16.1 7.78 Vp
43.2611 141.7485 55.0 0.0 7.67 Vp
43.3325 141.6716 55.0 0.0 7.56 Vp
41.9232 143.2257 55.0 0.0 7.78 Vp
41.9956 143.1521 55.0 0.0 7.77 Vp
42.0678 143.0783 55.0 7.3 7.75 Vp
42.1400 143.0044 55.0 93.9 7.19 Vp
42.2122 142.9303 55.0 466.5 7.07 Vp
42.2844 142.8559 55.0 1210.2 6.69 Vp
42.3564 142.7815 55.0 1599.1 7.07 Vp
42.4285 142.7068 55.0 1588.7 7.24 Vp
42.5005 142.6320 55.0 1110.3 7.13 Vp
42.5724 142.5570 55.0 813.3 7.07 Vp
42.6443 142.4819 55.0 625.7 7.22 Vp
42.7162 142.4065 55.0 535.3 7.34 Vp
42.7880 142.3310 55.0 331.0 7.35 Vp
42.8597 142.2553 55.0 473.9 7.69 Vp
42.9314 142.1795 55.0 181.8 7.52 Vp
43.0031 142.1035 55.0 124.9 7.76 Vp
43.0746 142.0272 55.0 107.1 7.46 Vp
43.1462 141.9509 55.0 62.0 7.96 Vp
43.2177 141.8743 55.0 10.2 7.79 Vp
43.2891 141.7976 55.0 0.0 7.75 Vp
43.3605 141.7206 55.0 0.0 7.68 Vp
41.9506 143.2744 55.0 0.0 7.78 Vp
42.0229 143.2008 55.0 0.0 7.77 Vp
42.0952 143.1270 55.0 3.5 7.69 Vp
42.1675 143.0531 55.0 71.7 7.27 Vp
42.2397 142.9790 55.0 583.1 7.40 Vp
42.3119 142.9047 55.0 2707.8 8.27 Vp
42.3840 142.8303 55.0 2296.5 7.04 Vp
42.4561 142.7556 55.0 1669.6 6.62 Vp
42.5281 142.6808 55.0 1051.4 6.68 Vp
42.6001 142.6059 55.0 691.5 6.89 Vp
42.6720 142.5307 55.0 333.5 6.85 Vp
42.7439 142.4554 55.0 330.3 7.20 Vp
42.8157 142.3800 55.0 634.2 7.43 Vp
42.8875 142.3043 55.0 671.4 7.73 Vp
42.9592 142.2284 55.0 230.9 7.48 Vp
43.0309 142.1524 55.0 127.8 7.48 Vp
43.1025 142.0762 55.0 101.1 7.63 Vp
43.1741 141.9999 55.0 38.2 7.80 Vp
43.2456 141.9233 55.0 10.9 7.78 Vp
43.3171 141.8466 55.0 0.0 7.74 Vp
43.3885 141.7697 55.0 0.0 7.62 Vp
41.9779 143.3230 55.0 0.0 7.78 Vp
42.0503 143.2495 55.0 0.0 7.77 Vp
42.1226 143.1757 55.0 3.2 7.77 Vp
42.1949 143.1018 55.0 74.5 7.58 Vp
42.2672 143.0278 55.0 926.6 7.71 Vp
42.3393 142.9535 55.0 3217.6 7.37 Vp
42.4115 142.8791 55.0 1568.8 6.91 Vp
42.4836 142.8045 55.0 1298.5 6.89 Vp
42.5557 142.7297 55.0 826.0 7.11 Vp
42.6277 142.6548 55.0 392.6 6.79 Vp
42.6996 142.5797 55.0 161.8 6.81 Vp
42.7715 142.5044 55.0 382.5 7.39 Vp
42.8434 142.4289 55.0 724.2 7.73 Vp
42.9152 142.3533 55.0 403.3 7.35 Vp
42.9870 142.2775 55.0 126.1 7.33 Vp
43.0587 142.2015 55.0 93.6 7.64 Vp
43.1303 142.1253 55.0 89.4 7.74 Vp
43.2019 142.0490 55.0 80.7 7.95 Vp
43.2735 141.9725 55.0 33.9 7.99 Vp
43.3450 141.8958 55.0 0.0 7.87 Vp
43.4164 141.8189 55.0 0.0 7.78 Vp
42.0052 143.3717 55.0 0.0 7.78 Vp
42.0776 143.2982 55.0 0.0 7.70 Vp
42.1500 143.2245 55.0 3.0 7.76 Vp
42.2223 143.1506 55.0 110.9 7.71 Vp
42.2946 143.0766 55.0 1000.0 7.75 Vp
42.3668 143.0023 55.0 1708.1 7.10 Vp
42.4390 142.9279 55.0 1224.3 7.06 Vp
42.5111 142.8534 55.0 1177.4 7.15 Vp
42.5832 142.7786 55.0 603.6 6.86 Vp
42.6553 142.7037 55.0 323.1 7.10 Vp
42.7273 142.6286 55.0 193.5 7.02 Vp
42.7992 142.5534 55.0 401.7 7.26 Vp
42.8711 142.4779 55.0 685.0 7.83 Vp
42.9429 142.4023 55.0 582.2 7.92 Vp
43.0147 142.3265 55.0 207.7 7.45 Vp
43.0865 142.2505 55.0 94.9 7.73 Vp
43.1581 142.1744 55.0 97.2 7.93 Vp
43.2298 142.0981 55.0 85.8 7.91 Vp
43.3014 142.0216 55.0 20.4 7.81 Vp
43.3729 141.9449 55.0 0.0 7.87 Vp
43.4444 141.8681 55.0 0.0 7.96 Vp
42.0325 143.4205 55.0 0.0 7.78 Vp
42.1049 143.3470 55.0 0.0 7.78 Vp
42.1773 143.2733 55.0 0.9 7.78 Vp
42.2497 143.1994 55.0 116.0 7.73 Vp
42.3220 143.1254 55.0 815.2 7.88 Vp
42.3943 143.0512 55.0 958.2 7.28 Vp
42.4665 142.9769 55.0 1026.7 6.99 Vp
42.5386 142.9023 55.0 1199.7 7.39 Vp
42.6108 142.8276 55.0 512.0 6.87 Vp
42.6828 142.7527 55.0 299.0 7.08 Vp
42.7549 142.6776 55.0 356.4 7.12 Vp
42.8268 142.6024 55.0 658.5 6.75 Vp
42.8988 142.5270 55.0 318.0 7.27 Vp
42.9706 142.4514 55.0 472.7 7.69 Vp
43.0425 142.3756 55.0 160.3 7.33 Vp
43.1142 142.2997 55.0 136.5 7.92 Vp
43.1859 142.2236 55.0 135.0 7.88 Vp
43.2576 142.1472 55.0 71.0 7.92 Vp
43.3292 142.0708 55.0 5.9 7.86 Vp
43.4008 141.9941 55.0 0.0 7.91 Vp
43.4723 141.9173 55.0 0.0 7.90 Vp
42.0598 143.4693 55.0 0.0 7.78 Vp
42.1322 143.3958 55.0 0.0 7.78 Vp
42.2047 143.3222 55.0 2.5 7.78 Vp
42.2771 143.2483 55.0 80.7 7.27 Vp
42.3494 143.1743 55.0 465.7 7.47 Vp
42.4217 143.1002 55.0 1009.2 6.87 Vp
42.4939 143.0258 55.0 914.1 6.72 Vp
42.5661 142.9513 55.0 1249.0 7.29 Vp
42.6383 142.8766 55.0 751.6 7.32 Vp
42.7104 142.8017 55.0 1065.5 7.81 Vp
42.7824 142.7267 55.0 1007.8 7.71 Vp
42.8544 142.6515 55.0 474.5 6.97 Vp
42.9264 142.5761 55.0 294.6 7.28 Vp
42.9983 142.5005 55.0 373.4 7.64 Vp
43.0702 142.4248 55.0 227.1 8.12 Vp
43.1420 142.3488 55.0 216.1 8.36 Vp
43.2137 142.2727 55.0 60.2 7.77 Vp
43.2854 142.1965 55.0 26.7 7.85 Vp
43.3571 142.1200 55.0 3.8 7.88 Vp
43.4286 142.0434 55.0 0.0 7.94 Vp
43.5002 141.9666 55.0 0.0 7.78 Vp
42.0870 143.5181 55.0 0.0 7.78 Vp
42.1595 143.4447 55.0 0.0 7.78 Vp
42.2320 143.3710 55.0 5.0 7.78 Vp
42.3044 143.2972 55.0 43.0 7.22 Vp
42.3768 143.2233 55.0 357.8 7.29 Vp
42.4491 143.1491 55.0 519.0 6.60 Vp
42.5214 143.0748 55.0 701.7 6.96 Vp
42.5936 143.0003 55.0 961.1 7.26 Vp
42.6658 142.9256 55.0 668.1 7.22 Vp
42.7379 142.8508 55.0 1069.0 7.44 Vp
42.8100 142.7758 55.0 2196.3 8.18 Vp
42.8820 142.7006 55.0 717.1 8.07 Vp
42.9540 142.6252 55.0 338.5 7.84 Vp
43.0260 142.5497 55.0 268.1 7.73 Vp
43.0978 142.4740 55.0 213.6 7.87 Vp
43.1697 142.3981 55.0 222.4 8.20 Vp
43.2415 142.3220 55.0 125.7 7.98 Vp
43.3132 142.2457 55.0 64.4 8.16 Vp
43.3849 142.1693 55.0 3.5 7.99 Vp
43.4565 142.0927 55.0 0.0 7.93 Vp
43.5281 142.0159 55.0 0.0 7.88 Vp
42.1142 143.5670 55.0 0.0 7.78 Vp
42.1868 143.4936 55.0 0.0 7.78 Vp
42.2593 143.4200 55.0 14.5 7.78 Vp
42.3317 143.3462 55.0 23.7 7.48 Vp
42.4041 143.2723 55.0 284.5 7.61 Vp
42.4765 143.1981 55.0 559.5 7.19 Vp
42.5488 143.1238 55.0 1071.6 7.64 Vp
42.6210 143.0494 55.0 1675.1 7.77 Vp
42.6932 142.9747 55.0 1795.9 8.13 Vp
42.7654 142.8999 55.0 2563.1 8.61 Vp
42.8375 142.8249 55.0 1092.7 8.10 Vp
42.9096 142.7497 55.0 511.9 7.97 Vp
42.9816 142.6744 55.0 572.1 8.17 Vp
43.0536 142.5989 55.0 236.3 7.46 Vp
43.1255 142.5232 55.0 134.9 7.76 Vp
43.1974 142.4473 55.0 117.1 7.91 Vp
43.2692 142.3712 55.0 123.1 8.00 Vp
43.3410 142.2950 55.0 61.0 8.01 Vp
43.4127 142.2186 55.0 2.0 7.99 Vp
43.4843 142.1420 55.0 0.0 7.79 Vp
43.5559 142.0653 55.0 0.0 7.79 Vp
42.1414 143.6160 55.0 0.0 7.78 Vp
42.2140 143.5425 55.0 0.0 7.78 Vp
42.2865 143.4690 55.0 6.5 7.78 Vp
42.3590 143.3952 55.0 21.1 7.47 Vp
42.4314 143.3213 55.0 572.9 8.06 Vp
42.5038 143.2472 55.0 1220.5 7.88 Vp
42.5762 143.1729 55.0 830.0 7.24 Vp
42.6485 143.0985 55.0 1540.0 8.01 Vp
42.7207 143.0238 55.0 1721.7 7.81 Vp
42.7929 142.9491 55.0 1108.5 7.99 Vp
42.8650 142.8741 55.0 963.1 8.05 Vp
42.9372 142.7990 55.0 739.4 7.95 Vp
43.0092 142.7236 55.0 970.4 8.57 Vp
43.0812 142.6481 55.0 308.7 7.87 Vp
43.1532 142.5724 55.0 127.1 7.62 Vp
43.2251 142.4966 55.0 100.9 7.87 Vp
43.2969 142.4206 55.0 64.8 7.81 Vp
43.3687 142.3444 55.0 68.8 7.96 Vp
43.4404 142.2680 55.0 9.7 7.91 Vp
43.5121 142.1914 55.0 0.0 7.87 Vp
43.5838 142.1147 55.0 0.0 7.80 Vp
42.1686 143.6649 55.0 0.0 7.78 Vp
42.2412 143.5915 55.0 0.0 7.78 Vp
42.3138 143.5180 55.0 1.0 7.78 Vp
42.3863 143.4443 55.0 77.6 7.23 Vp
42.4587 143.3704 55.0 722.4 7.89 Vp
42.5312 143.2963 55.0 1282.1 7.85 Vp
42.6035 143.2220 55.0 1233.6 7.74 Vp
42.6759 143.1476 55.0 1809.3 7.88 Vp
42.7481 143.0730 55.0 1090.6 7.83 Vp
42.8204 142.9982 55.0 1403.2 8.80 Vp
42.8925 142.9233 55.0 1447.1 8.37 Vp
42.9647 142.8482 55.0 896.6 8.37 Vp
43.0368 142.7729 55.0 568.9 7.99 Vp
43.1088 142.6974 55.0 246.8 7.98 Vp
43.1808 142.6218 55.0 120.5 7.71 Vp
43.2527 142.5459 55.0 54.3 7.65 Vp
43.3246 142.4699 55.0 51.3 7.48 Vp
43.3964 142.3938 55.0 35.5 7.63 Vp
43.4682 142.3174 55.0 28.6 7.93 Vp
43.5399 142.2409 55.0 0.0 7.83 Vp
43.6116 142.1642 55.0 0.0 7.79 Vp
42.1958 143.7139 55.0 0.0 7.78 Vp
42.2684 143.6406 55.0 0.0 7.78 Vp
42.3410 143.5670 55.0 0.6 7.78 Vp
42.4135 143.4933 55.0 113.5 7.56 Vp
42.4860 143.4195 55.0 782.8 8.25 Vp
42.5585 143.3454 55.0 1502.3 8.23 Vp
42.6309 143.2712 55.0 2485.1 8.15 Vp
42.7032 143.1968 55.0 2060.8 7.95 Vp
42.7755 143.1222 55.0 1572.8 8.47 Vp
42.8478 143.0475 55.0 2507.2 8.71 Vp
42.9200 142.9726 55.0 1794.5 8.17 Vp
42.9922 142.8975 55.0 732.6 7.88 Vp
43.0643 142.8222 55.0 482.8 8.15 Vp
43.1364 142.7468 55.0 360.4 8.10 Vp
43.2084 142.6711 55.0 148.6 7.79 Vp
43.2803 142.5953 55.0 43.3 7.60 Vp
43.3522 142.5193 55.0 48.6 7.65 Vp
43.4241 142.4432 55.0 68.8 7.82 Vp
43.4959 142.3669 55.0 34.1 7.92 Vp
43.5677 142.2903 55.0 0.0 7.79 Vp
43.6394 142.2136 55.0 0.0 7.78 Vp
42.2229 143.7630 55.0 0.0 7.78 Vp
42.2956 143.6896 55.0 0.0 7.78 Vp
42.3682 143.6161 55.0 0.0 7.78 Vp
42.4408 143.5425 55.0 53.6 7.89 Vp
42.5133 143.4686 55.0 551.7 7.86 Vp
42.5858 143.3946 55.0 1670.2 8.59 Vp
42.6582 143.3204 55.0 2585.0 8.30 Vp
42.7306 143.2460 55.0 1991.0 7.96 Vp
42.8029 143.1715 55.0 1802.1 8.10 Vp
42.8752 143.0968 55.0 2100.8 8.16 Vp
42.9475 143.0219 55.0 1642.9 8.04 Vp
43.0197 142.9468 55.0 724.9 7.85 Vp
43.0918 142.8716 55.0 824.2 8.65 Vp
43.1639 142.7961 55.0 315.4 7.91 Vp
43.2360 142.7205 55.0 102.4 7.99 Vp
43.3079 142.6448 55.0 56.3 7.88 Vp
43.3799 142.5688 55.0 50.7 7.56 Vp
43.4518 142.4927 55.0 75.7 7.58 Vp
43.5236 142.4164 55.0 7.5 7.83 Vp
43.5954 142.3399 55.0 0.0 7.79 Vp
43.6671 142.2632 55.0 0.0 7.78 Vp
42.2500 143.8121 55.0 0.0 7.78 Vp
42.3227 143.7388 55.0 0.0 7.78 Vp
42.3954 143.6653 55.0 0.0 7.78 Vp
42.4680 143.5916 55.0 50.8 7.93 Vp
42.5405 143.5178 55.0 1214.3 8.08 Vp
42.6130 143.4438 55.0 2193.8 8.61 Vp
42.6855 143.3697 55.0 1662.3 8.05 Vp
42.7579 143.2953 55.0 1553.9 7.92 Vp
42.8303 143.2208 55.0 1403.1 8.23 Vp
42.9026 143.1461 55.0 1202.8 8.40 Vp
42.9749 143.0712 55.0 1133.0 8.17 Vp
43.0471 142.9962 55.0 427.4 7.64 Vp
43.1193 142.9210 55.0 561.1 8.16 Vp
43.1914 142.8456 55.0 300.2 7.81 Vp
43.2635 142.7700 55.0 162.2 8.01 Vp
43.3355 142.6942 55.0 98.8 8.14 Vp
43.4075 142.6183 55.0 48.1 7.80 Vp
43.4794 142.5422 55.0 61.2 8.01 Vp
43.5513 142.4659 55.0 1.7 7.78 Vp
43.6231 142.3894 55.0 0.0 7.78 Vp
43.6949 142.3128 55.0 0.0 7.78 Vp
42.2771 143.8612 55.0 0.0 7.78 Vp
42.3498 143.7879 55.0 0.0 7.78 Vp
42.4225 143.7145 55.0 0.0 7.78 Vp
42.4952 143.6409 55.0 8.2 7.92 Vp
42.5677 143.5670 55.0 471.3 8.21 Vp
42.6403 143.4931 55.0 1301.9 8.32 Vp
42.7128 143.4189 55.0 1351.0 7.82 Vp
42.7852 143.3446 55.0 1527.5 7.80 Vp
42.8576 143.2701 55.0 1089.8 7.68 Vp
42.9300 143.1955 55.0 1138.6 8.16 Vp
43.0023 143.1206 55.0 1165.7 8.15 Vp
43.0746 143.0456 55.0 391.4 7.75 Vp
43.1468 142.9704 55.0 281.9 7.81 Vp
43.2189 142.8950 55.0 287.8 7.69 Vp
43.2910 142.8195 55.0 133.8 7.71 Vp
43.3631 142.7438 55.0 59.3 8.00 Vp
43.4351 142.6678 55.0 46.2 7.77 Vp
43.5071 142.5918 55.0 63.6 7.94 Vp
43.5790 142.5155 55.0 3.9 7.77 Vp
43.6508 142.4390 55.0 0.0 7.78 Vp
43.7226 142.3624 55.0 0.0 7.78 Vp
42.3042 143.9104 55.0 0.0 7.78 Vp
42.3770 143.8371 55.0 0.0 7.78 Vp
42.4497 143.7637 55.0 0.0 7.78 Vp
42.5223 143.6901 55.0 0.5 7.78 Vp
42.5949 143.6163 55.0 169.6 7.95 Vp
42.6675 143.5424 55.0 657.1 8.23 Vp
42.7401 143.4683 55.0 1506.9 8.39 Vp
42.8125 143.3940 55.0 2126.2 8.35 Vp
42.8850 143.3195 55.0 1012.4 7.76 Vp
42.9574 143.2449 55.0 1118.4 7.98 Vp
43.0297 143.1701 55.0 1552.0 8.10 Vp
43.1020 143.0951 55.0 624.6 7.81 Vp
43.1742 143.0199 55.0 283.2 7.99 Vp
43.2464 142.9445 55.0 233.8 7.98 Vp
43.3186 142.8690 55.0 141.6 7.78 Vp
43.3906 142.7933 55.0 28.6 7.78 Vp
43.4627 142.7174 55.0 31.2 7.78 Vp
43.5347 142.6414 55.0 43.3 8.09 Vp
43.6066 142.5651 55.0 2.6 7.78 Vp
43.6785 142.4887 55.0 0.0 7.78 Vp
43.7503 142.4121 55.0 0.0 7.78 Vp
42.3313 143.9596 55.0 0.0 7.78 Vp
42.4040 143.8864 55.0 0.0 7.78 Vp
42.4768 143.8130 55.0 0.0 7.78 Vp
42.5495 143.7394 55.0 0.0 7.78 Vp
42.6221 143.6657 55.0 109.3 8.06 Vp
42.6947 143.5918 55.0 593.2 8.33 Vp
42.7673 143.5177 55.0 1196.5 8.02 Vp
42.8398 143.4434 55.0 1444.7 7.97 Vp
42.9123 143.3690 55.0 1071.5 7.99 Vp
42.9847 143.2943 55.0 797.1 7.66 Vp
43.0571 143.2195 55.0 1045.5 8.10 Vp
43.1294 143.1446 55.0 601.2 7.81 Vp
43.2017 143.0694 55.0 272.3 7.83 Vp
43.2739 142.9941 55.0 282.6 7.94 Vp
43.3461 142.9186 55.0 93.2 7.59 Vp
43.4182 142.8429 55.0 21.4 7.78 Vp
43.4902 142.7671 55.0 11.9 7.78 Vp
43.5623 142.6910 55.0 16.7 7.78 Vp
43.6342 142.6148 55.0 0.3 7.78 Vp
43.7061 142.5384 55.0 0.0 7.78 Vp
43.7780 142.4618 55.0 0.0 7.78 Vp
42.3583 144.0088 55.0 0.0 7.78 Vp
42.4311 143.9357 55.0 0.0 7.78 Vp
42.5039 143.8623 55.0 0.0 7.78 Vp
42.5766 143.7887 55.0 0.0 7.78 Vp
42.6493 143.7150 55.0 20.8 7.78 Vp
42.7219 143.6411 55.0 374.1 8.08 Vp
42.7945 143.5671 55.0 1080.4 8.28 Vp
42.8671 143.4928 55.0 1286.2 8.12 Vp
42.9396 143.4184 55.0 1084.3 8.52 Vp
43.0120 143.3438 55.0 746.2 8.33 Vp
43.0844 143.2691 55.0 761.6 7.90 Vp
43.1568 143.1941 55.0 419.1 7.71 Vp
43.2291 143.1190 55.0 153.5 7.46 Vp
43.3013 143.0437 55.0 194.8 7.74 Vp
43.3735 142.9682 55.0 80.6 7.67 Vp
43.4457 142.8926 55.0 19.2 7.78 Vp
43.5178 142.8167 55.0 4.8 7.78 Vp
43.5898 142.7407 55.0 2.6 7.78 Vp
43.6618 142.6645 55.0 0.9 7.78 Vp
43.7338 142.5882 55.0 0.0 7.76 Vp
43.8056 142.5116 55.0 0.0 7.76 Vp
42.3853 144.0581 55.0 0.0 7.78 Vp
42.4581 143.9850 55.0 0.0 7.78 Vp
42.5309 143.9116 55.0 0.0 7.78 Vp
42.6037 143.8381 55.0 0.0 7.78 Vp
42.6764 143.7644 55.0 4.0 7.78 Vp
42.7491 143.6906 55.0 340.7 8.35 Vp
42.8217 143.6165 55.0 1255.7 8.24 Vp
42.8943 143.5423 55.0 1372.7 8.27 Vp
42.9668 143.4679 55.0 1064.0 8.31 Vp
43.0393 143.3934 55.0 1192.4 8.61 Vp
43.1117 143.3186 55.0 978.2 7.98 Vp
43.1841 143.2437 55.0 477.7 7.58 Vp
43.2564 143.1686 55.0 164.8 7.50 Vp
43.3287 143.0934 55.0 92.7 7.70 Vp
43.4010 143.0179 55.0 61.0 7.74 Vp
43.4732 142.9423 55.0 20.2 7.76 Vp
43.5453 142.8665 55.0 5.0 7.76 Vp
43.6174 142.7905 55.0 2.1 7.76 Vp
43.6894 142.7143 55.0 5.0 7.76 Vp
43.7614 142.6380 55.0 0.0 7.76 Vp
43.8333 142.5614 55.0 0.0 7.76 Vp
42.4392 144.1569 55.0 0.0 7.78 Vp
42.5122 144.0837 55.0 0.0 7.78 Vp
42.5850 144.0105 55.0 0.0 7.78 Vp
42.6578 143.9370 55.0 0.0 7.78 Vp
42.7306 143.8634 55.0 0.5 7.78 Vp
42.8033 143.7896 55.0 236.1 8.38 Vp
42.8760 143.7156 55.0 1505.7 8.45 Vp
42.9487 143.6414 55.0 1829.6 8.16 Vp
43.0213 143.5671 55.0 1143.3 8.13 Vp
43.0938 143.4926 55.0 1088.6 8.04 Vp
43.1663 143.4179 55.0 940.2 7.84 Vp
43.2388 143.3430 55.0 441.8 7.40 Vp
43.3111 143.2680 55.0 131.0 7.40 Vp
43.3835 143.1928 55.0 68.4 7.43 Vp
43.4558 143.1174 55.0 58.6 7.54 Vp
43.5280 143.0418 55.0 22.4 7.76 Vp
43.6002 142.9660 55.0 1.4 7.76 Vp
43.6724 142.8901 55.0 4.9 7.76 Vp
43.7445 142.8140 55.0 4.5 7.76 Vp
43.8165 142.7377 55.0 0.0 7.76 Vp
43.8885 142.6612 55.0 0.0 7.76 Vp
42.4931 144.2557 55.0 0.0 7.76 Vp
42.5661 144.1827 55.0 0.0 7.76 Vp
42.6390 144.1095 55.0 0.0 7.76 Vp
42.7119 144.0361 55.0 0.0 7.76 Vp
42.7847 143.9625 55.0 0.0 7.76 Vp
42.8575 143.8887 55.0 75.3 8.01 Vp
42.9303 143.8148 55.0 996.1 8.23 Vp
43.0030 143.7407 55.0 2189.2 8.52 Vp
43.0756 143.6664 55.0 1415.9 8.38 Vp
43.1482 143.5919 55.0 1432.4 8.30 Vp
43.2208 143.5173 55.0 968.0 8.15 Vp
43.2933 143.4425 55.0 343.5 7.63 Vp
43.3658 143.3675 55.0 181.8 7.88 Vp
43.4382 143.2924 55.0 136.7 7.81 Vp
43.5105 143.2170 55.0 61.8 7.58 Vp
43.5828 143.1415 55.0 19.0 7.76 Vp
43.6551 143.0658 55.0 5.0 7.76 Vp
43.7273 142.9899 55.0 9.6 7.76 Vp
43.7995 142.9138 55.0 2.9 7.76 Vp
43.8716 142.8376 55.0 0.0 7.76 Vp
43.9436 142.7611 55.0 0.0 7.76 Vp
42.5469 144.3548 55.0 0.0 7.76 Vp
42.6199 144.2818 55.0 0.0 7.76 Vp
42.6929 144.2086 55.0 0.0 7.76 Vp
42.7659 144.1353 55.0 0.0 7.76 Vp
42.8387 144.0618 55.0 0.0 7.76 Vp
42.9116 143.9881 55.0 27.8 8.04 Vp
42.9844 143.9142 55.0 463.8 8.32 Vp
43.0572 143.8401 55.0 1363.0 8.54 Vp
43.1299 143.7659 55.0 813.9 7.99 Vp
43.2026 143.6915 55.0 961.2 8.32 Vp
43.2752 143.6169 55.0 638.1 8.38 Vp
43.3478 143.5422 55.0 177.8 7.89 Vp
43.4203 143.4672 55.0 70.0 7.76 Vp
43.4928 143.3921 55.0 56.7 7.70 Vp
43.5652 143.3168 55.0 24.6 7.62 Vp
43.6376 143.2413 55.0 15.5 7.76 Vp
43.7099 143.1657 55.0 5.9 7.76 Vp
43.7821 143.0899 55.0 16.4 7.76 Vp
43.8544 143.0139 55.0 1.9 7.76 Vp
43.9265 142.9377 55.0 0.0 7.76 Vp
43.9986 142.8613 55.0 0.0 7.76 Vp
42.6006 144.4540 55.0 0.0 7.76 Vp
42.6737 144.3810 55.0 0.0 7.76 Vp
42.7467 144.3079 55.0 0.0 7.76 Vp
42.8197 144.2346 55.0 0.0 7.76 Vp
42.8927 144.1612 55.0 0.0 7.76 Vp
42.9656 144.0876 55.0 0.8 7.76 Vp
43.0385 144.0137 55.0 39.0 8.16 Vp
43.1113 143.9397 55.0 215.6 8.08 Vp
43.1841 143.8656 55.0 260.2 7.99 Vp
43.2568 143.7912 55.0 224.4 7.93 Vp
43.3295 143.7167 55.0 252.1 7.87 Vp
43.4021 143.6420 55.0 126.1 7.86 Vp
43.4747 143.5671 55.0 91.7 7.81 Vp
43.5473 143.4921 55.0 49.0 7.78 Vp
43.6197 143.4168 55.0 24.1 7.76 Vp
43.6922 143.3414 55.0 5.7 7.76 Vp
43.7646 143.2658 55.0 4.3 7.76 Vp
43.8369 143.1900 55.0 11.0 7.76 Vp
43.9092 143.1141 55.0 1.2 7.76 Vp
43.9814 143.0379 55.0 0.0 7.76 Vp
44.0536 142.9616 55.0 0.0 7.76 Vp
42.6542 144.5534 55.0 0.0 7.76 Vp
42.7273 144.4805 55.0 0.0 7.76 Vp
42.8004 144.4074 55.0 0.0 7.76 Vp
42.8735 144.3342 55.0 0.0 7.76 Vp
42.9465 144.2608 55.0 0.0 7.76 Vp
43.0195 144.1872 55.0 0.0 7.76 Vp
43.0924 144.1134 55.0 0.0 7.76 Vp
43.1653 144.0395 55.0 0.0 7.76 Vp
43.2382 143.9654 55.0 3.3 7.76 Vp
43.3110 143.8911 55.0 0.6 7.76 Vp
43.3837 143.8167 55.0 5.1 7.76 Vp
43.4564 143.7420 55.0 19.1 7.72 Vp
43.5291 143.6672 55.0 25.3 7.72 Vp
43.6017 143.5922 55.0 23.4 7.76 Vp
43.6742 143.5170 55.0 16.1 7.76 Vp
43.7467 143.4416 55.0 0.0 7.76 Vp
43.8191 143.3661 55.0 0.0 7.76 Vp
43.8915 143.2903 55.0 0.0 7.76 Vp
43.9639 143.2144 55.0 0.0 7.76 Vp
44.0362 143.1384 55.0 0.0 7.76 Vp
44.1084 143.0621 55.0 0.0 7.76 Vp
41.0084 141.6436 60.0 0.0 7.82 Vp
41.0797 141.5692 60.0 0.0 7.82 Vp
41.1510 141.4946 60.0 0.0 7.86 Vp
41.2222 141.4199 60.0 0.0 7.85 Vp
41.2934 141.3450 60.0 0.0 7.95 Vp
41.3645 141.2700 60.0 0.0 7.83 Vp
41.4356 141.1947 60.0 0.0 7.93 Vp
41.5066 141.1194 60.0 0.0 7.84 Vp
41.5776 141.0438 60.0 0.0 7.73 Vp
41.6486 140.9681 60.0 0.0 7.83 Vp
41.7194 140.8922 60.0 0.0 7.73 Vp
41.7903 140.8161 60.0 0.0 7.67 Vp
41.8611 140.7399 60.0 0.0 7.79 Vp
41.9318 140.6635 60.0 0.0 7.73 Vp
42.0025 140.5869 60.0 0.0 7.70 Vp
42.0731 140.5102 60.0 0.0 7.67 Vp
42.1437 140.4333 60.0 0.0 7.65 Vp
42.2142 140.3562 60.0 0.0 7.72 Vp
42.2847 140.2790 60.0 0.0 7.81 Vp
42.3551 140.2016 60.0 0.0 7.70 Vp
42.4255 140.1240 60.0 0.0 7.78 Vp
41.0644 141.7383 60.0 0.0 7.82 Vp
41.1358 141.6639 60.0 0.0 7.82 Vp
41.2071 141.5894 60.0 0.0 7.82 Vp
41.2784 141.5147 60.0 0.0 7.76 Vp
41.3496 141.4398 60.0 11.9 7.63 Vp
41.4208 141.3648 60.0 45.4 7.78 Vp
41.4920 141.2896 60.0 31.1 7.94 Vp
41.5631 141.2143 60.0 14.6 7.88 Vp
41.6341 141.1387 60.0 4.7 7.69 Vp
41.7052 141.0630 60.0 1.7 7.57 Vp
41.7761 140.9872 60.0 0.6 7.57 Vp
41.8470 140.9112 60.0 0.2 7.57 Vp
41.9179 140.8350 60.0 0.0 7.72 Vp
41.9887 140.7586 60.0 0.0 7.71 Vp
42.0594 140.6821 60.0 0.0 7.64 Vp
42.1301 140.6054 60.0 0.0 7.64 Vp
42.2008 140.5285 60.0 0.0 7.64 Vp
42.2714 140.4515 60.0 0.0 7.64 Vp
42.3419 140.3743 60.0 0.0 7.69 Vp
42.4124 140.2969 60.0 0.0 7.80 Vp
42.4828 140.2193 60.0 0.0 7.85 Vp
41.1203 141.8331 60.0 0.0 7.82 Vp
41.1918 141.7587 60.0 0.0 7.82 Vp
41.2632 141.6842 60.0 0.0 7.76 Vp
41.3345 141.6096 60.0 0.0 7.62 Vp
41.4058 141.5348 60.0 13.9 7.55 Vp
41.4771 141.4598 60.0 155.4 7.87 Vp
41.5483 141.3846 60.0 165.4 7.98 Vp
41.6195 141.3093 60.0 107.5 7.84 Vp
41.6906 141.2338 60.0 107.2 7.59 Vp
41.7617 141.1582 60.0 78.0 7.50 Vp
41.8327 141.0824 60.0 29.4 7.49 Vp
41.9037 141.0064 60.0 22.1 7.59 Vp
41.9746 140.9302 60.0 1.3 7.62 Vp
42.0454 140.8539 60.0 0.2 7.62 Vp
42.1163 140.7774 60.0 0.0 7.62 Vp
42.1870 140.7007 60.0 0.0 7.63 Vp
42.2577 140.6239 60.0 0.0 7.68 Vp
42.3284 140.5469 60.0 0.0 7.70 Vp
42.3990 140.4697 60.0 0.0 7.78 Vp
42.4695 140.3924 60.0 0.0 7.85 Vp
42.5400 140.3149 60.0 0.0 7.84 Vp
41.1762 141.9280 60.0 0.0 7.82 Vp
41.2477 141.8537 60.0 0.0 7.75 Vp
41.3192 141.7793 60.0 0.0 7.62 Vp
41.3906 141.7047 60.0 0.0 7.49 Vp
41.4620 141.6299 60.0 8.2 7.59 Vp
41.5333 141.5549 60.0 13.1 7.90 Vp
41.6046 141.4798 60.0 69.8 8.02 Vp
41.6758 141.4046 60.0 123.8 7.78 Vp
41.7470 141.3291 60.0 273.0 7.74 Vp
41.8181 141.2535 60.0 323.1 7.69 Vp
41.8892 141.1777 60.0 139.0 7.62 Vp
41.9602 141.1018 60.0 82.7 7.69 Vp
42.0312 141.0256 60.0 59.3 7.62 Vp
42.1021 140.9494 60.0 12.8 7.61 Vp
42.1730 140.8729 60.0 0.0 7.63 Vp
42.2439 140.7963 60.0 0.0 7.64 Vp
42.3146 140.7195 60.0 0.0 7.69 Vp
42.3853 140.6425 60.0 0.0 7.78 Vp
42.4560 140.5654 60.0 0.0 7.74 Vp
42.5266 140.4880 60.0 0.0 7.83 Vp
42.5972 140.4106 60.0 0.0 7.80 Vp
41.2320 142.0231 60.0 0.0 7.82 Vp
41.3036 141.9489 60.0 0.0 7.64 Vp
41.3751 141.8745 60.0 0.0 7.49 Vp
41.4466 141.7999 60.0 0.1 7.55 Vp
41.5180 141.7252 60.0 17.3 7.51 Vp
41.5894 141.6503 60.0 43.6 7.81 Vp
41.6607 141.5752 60.0 54.0 7.97 Vp
41.7320 141.5000 60.0 90.5 7.76 Vp
41.8033 141.4246 60.0 118.2 7.77 Vp
41.8745 141.3490 60.0 212.0 7.81 Vp
41.9456 141.2732 60.0 273.6 7.78 Vp
42.0167 141.1973 60.0 171.6 7.64 Vp
42.0878 141.1212 60.0 294.6 7.68 Vp
42.1588 141.0450 60.0 115.0 7.59 Vp
42.2297 140.9686 60.0 3.5 7.53 Vp
42.3006 140.8920 60.0 0.6 7.62 Vp
42.3715 140.8152 60.0 0.1 7.68 Vp
42.4422 140.7383 60.0 0.0 7.70 Vp
42.5130 140.6611 60.0 0.0 7.79 Vp
42.5836 140.5839 60.0 0.0 7.80 Vp
42.6543 140.5064 60.0 0.0 7.81 Vp
41.2877 142.1184 60.0 0.0 7.79 Vp
41.3593 142.0443 60.0 0.0 7.62 Vp
41.4309 141.9699 60.0 0.0 7.53 Vp
41.5025 141.8954 60.0 12.6 7.65 Vp
41.5740 141.8207 60.0 105.5 7.76 Vp
41.6454 141.7458 60.0 110.7 7.79 Vp
41.7168 141.6708 60.0 82.3 7.89 Vp
41.7882 141.5956 60.0 154.5 7.94 Vp
41.8595 141.5202 60.0 192.9 7.84 Vp
41.9308 141.4446 60.0 223.0 7.80 Vp
42.0020 141.3689 60.0 252.9 7.77 Vp
42.0731 141.2931 60.0 272.3 7.63 Vp
42.1443 141.2170 60.0 439.3 7.70 Vp
42.2153 141.1408 60.0 238.6 7.58 Vp
42.2863 141.0644 60.0 51.8 7.44 Vp
42.3573 140.9879 60.0 38.6 7.53 Vp
42.4282 140.9111 60.0 6.0 7.69 Vp
42.4990 140.8342 60.0 0.3 7.72 Vp
42.5698 140.7571 60.0 0.0 7.81 Vp
42.6406 140.6799 60.0 0.0 7.82 Vp
42.7113 140.6025 60.0 0.0 7.85 Vp
41.3433 142.2139 60.0 0.0 7.77 Vp
41.4150 142.1398 60.0 0.0 7.62 Vp
41.4867 142.0654 60.0 0.2 7.65 Vp
41.5583 141.9910 60.0 173.4 7.76 Vp
41.6299 141.9163 60.0 725.2 8.12 Vp
41.7014 141.8415 60.0 368.6 7.96 Vp
41.7728 141.7665 60.0 181.7 7.91 Vp
41.8443 141.6913 60.0 251.3 7.80 Vp
41.9156 141.6160 60.0 230.3 7.85 Vp
41.9870 141.5405 60.0 213.6 7.77 Vp
42.0583 141.4648 60.0 206.2 7.71 Vp
42.1295 141.3890 60.0 368.7 7.64 Vp
42.2007 141.3130 60.0 497.4 7.73 Vp
42.2718 141.2368 60.0 243.0 7.58 Vp
42.3429 141.1604 60.0 129.1 7.46 Vp
42.4139 141.0839 60.0 215.6 7.57 Vp
42.4849 141.0072 60.0 100.2 7.61 Vp
42.5558 140.9303 60.0 11.9 7.72 Vp
42.6266 140.8533 60.0 0.1 7.78 Vp
42.6975 140.7761 60.0 0.0 7.85 Vp
42.7682 140.6987 60.0 0.0 7.93 Vp
41.3989 142.3096 60.0 0.0 7.82 Vp
41.4706 142.2354 60.0 0.0 7.69 Vp
41.5424 142.1611 60.0 1.8 7.96 Vp
41.6140 142.0867 60.0 177.7 8.07 Vp
41.6857 142.0121 60.0 619.5 8.09 Vp
41.7573 141.9373 60.0 540.1 8.05 Vp
41.8288 141.8624 60.0 476.6 7.82 Vp
41.9003 141.7872 60.0 352.3 7.74 Vp
41.9717 141.7119 60.0 179.3 7.82 Vp
42.0431 141.6365 60.0 207.3 7.77 Vp
42.1145 141.5609 60.0 288.8 7.72 Vp
42.1857 141.4851 60.0 687.2 7.77 Vp
42.2570 141.4091 60.0 680.8 7.84 Vp
42.3282 141.3329 60.0 239.2 7.61 Vp
42.3993 141.2566 60.0 150.8 7.54 Vp
42.4704 141.1801 60.0 196.4 7.59 Vp
42.5415 141.1035 60.0 170.3 7.57 Vp
42.6124 141.0267 60.0 87.3 7.64 Vp
42.6834 140.9497 60.0 23.0 7.76 Vp
42.7542 140.8725 60.0 1.0 7.92 Vp
42.8251 140.7951 60.0 0.0 8.06 Vp
41.4544 142.4053 60.0 0.0 7.83 Vp
41.5262 142.3313 60.0 0.0 7.81 Vp
41.5980 142.2570 60.0 0.3 7.81 Vp
41.6697 142.1826 60.0 69.8 7.96 Vp
41.7414 142.1081 60.0 200.2 7.70 Vp
41.8131 142.0333 60.0 550.2 7.80 Vp
41.8847 141.9584 60.0 550.5 7.50 Vp
41.9562 141.8833 60.0 333.4 7.70 Vp
42.0277 141.8081 60.0 291.5 7.83 Vp
42.0992 141.7327 60.0 340.5 7.82 Vp
42.1706 141.6571 60.0 526.8 7.78 Vp
42.2419 141.5813 60.0 810.7 7.95 Vp
42.3132 141.5054 60.0 604.6 7.91 Vp
42.3845 141.4293 60.0 255.7 7.70 Vp
42.4557 141.3530 60.0 197.2 7.68 Vp
42.5269 141.2766 60.0 293.4 7.85 Vp
42.5980 141.1999 60.0 171.9 7.64 Vp
42.6690 141.1231 60.0 108.1 7.58 Vp
42.7400 141.0462 60.0 69.0 7.74 Vp
42.8109 140.9690 60.0 12.2 8.01 Vp
42.8818 140.8917 60.0 0.0 7.70 Vp
41.5098 142.5013 60.0 0.0 7.81 Vp
41.5816 142.4273 60.0 0.0 7.82 Vp
41.6535 142.3531 60.0 0.0 7.62 Vp
41.7253 142.2787 60.0 26.2 7.62 Vp
41.7971 142.2042 60.0 112.5 7.47 Vp
41.8688 142.1295 60.0 264.7 7.46 Vp
41.9404 142.0546 60.0 344.1 7.56 Vp
42.0121 141.9796 60.0 394.0 7.63 Vp
42.0836 141.9044 60.0 685.9 7.83 Vp
42.1551 141.8290 60.0 1019.5 7.95 Vp
42.2266 141.7535 60.0 887.1 8.02 Vp
42.2980 141.6777 60.0 884.3 8.04 Vp
42.3694 141.6019 60.0 508.2 7.98 Vp
42.4407 141.5258 60.0 318.7 7.83 Vp
42.5120 141.4496 60.0 325.6 7.87 Vp
42.5832 141.3732 60.0 339.2 7.95 Vp
42.6544 141.2966 60.0 212.7 7.81 Vp
42.7255 141.2198 60.0 75.0 7.63 Vp
42.7966 141.1429 60.0 41.4 7.68 Vp
42.8676 141.0658 60.0 7.9 7.91 Vp
42.9385 140.9885 60.0 0.0 7.80 Vp
41.5651 142.5975 60.0 0.0 7.82 Vp
41.6370 142.5235 60.0 0.0 7.70 Vp
41.7090 142.4493 60.0 3.4 7.56 Vp
41.7808 142.3750 60.0 5.5 7.46 Vp
41.8526 142.3005 60.0 88.3 7.53 Vp
41.9244 142.2259 60.0 567.5 7.73 Vp
41.9961 142.1510 60.0 669.2 7.70 Vp
42.0678 142.0760 60.0 468.0 7.49 Vp
42.1395 142.0009 60.0 797.8 7.69 Vp
42.2110 141.9256 60.0 950.5 7.99 Vp
42.2826 141.8500 60.0 513.4 7.96 Vp
42.3541 141.7744 60.0 581.5 8.06 Vp
42.4255 141.6985 60.0 544.2 8.05 Vp
42.4969 141.6225 60.0 485.1 7.96 Vp
42.5682 141.5463 60.0 445.5 7.96 Vp
42.6395 141.4699 60.0 341.0 7.99 Vp
42.7107 141.3934 60.0 226.3 7.90 Vp
42.7819 141.3167 60.0 93.0 7.74 Vp
42.8530 141.2398 60.0 18.8 7.67 Vp
42.9241 141.1627 60.0 5.5 7.63 Vp
42.9951 141.0855 60.0 0.0 7.69 Vp
41.6203 142.6938 60.0 0.0 7.82 Vp
41.6923 142.6198 60.0 0.0 7.78 Vp
41.7643 142.5457 60.0 32.4 7.65 Vp
41.8363 142.4715 60.0 40.6 7.54 Vp
41.9081 142.3970 60.0 362.1 7.72 Vp
41.9800 142.3224 60.0 2367.2 7.59 Vp
42.0518 142.2476 60.0 1435.9 7.72 Vp
42.1235 142.1727 60.0 613.3 7.48 Vp
42.1952 142.0975 60.0 842.6 7.54 Vp
42.2669 142.0223 60.0 1072.7 7.60 Vp
42.3385 141.9468 60.0 1421.2 7.89 Vp
42.4100 141.8711 60.0 640.7 8.04 Vp
42.4815 141.7953 60.0 540.6 8.01 Vp
42.5530 141.7194 60.0 597.5 8.12 Vp
42.6244 141.6432 60.0 597.2 8.12 Vp
42.6957 141.5669 60.0 477.5 8.07 Vp
42.7670 141.4904 60.0 279.1 7.95 Vp
42.8383 141.4137 60.0 69.8 7.77 Vp
42.9094 141.3369 60.0 13.2 7.63 Vp
42.9806 141.2598 60.0 1.3 7.67 Vp
43.0517 141.1826 60.0 0.0 7.74 Vp
41.6755 142.7902 60.0 0.0 7.82 Vp
41.7476 142.7163 60.0 0.0 7.80 Vp
41.8196 142.6423 60.0 89.8 7.76 Vp
41.8916 142.5681 60.0 74.5 6.30 Vp
41.9636 142.4937 60.0 187.1 6.41 Vp
42.0355 142.4191 60.0 1208.0 7.25 Vp
42.1073 142.3444 60.0 968.4 7.40 Vp
42.1791 142.2695 60.0 403.3 6.84 Vp
42.2509 142.1944 60.0 527.7 7.28 Vp
42.3226 142.1191 60.0 569.9 7.32 Vp
42.3943 142.0437 60.0 1200.4 7.14 Vp
42.4659 141.9681 60.0 760.3 7.66 Vp
42.5375 141.8923 60.0 541.6 7.71 Vp
42.6090 141.8164 60.0 1002.0 8.49 Vp
42.6804 141.7403 60.0 656.7 8.00 Vp
42.7519 141.6640 60.0 443.1 7.64 Vp
42.8232 141.5875 60.0 252.7 7.92 Vp
42.8945 141.5109 60.0 112.1 8.16 Vp
42.9658 141.4341 60.0 52.4 8.51 Vp
43.0370 141.3571 60.0 0.9 7.70 Vp
43.1081 141.2800 60.0 0.0 7.77 Vp
41.7306 142.8869 60.0 0.0 7.82 Vp
41.8027 142.8130 60.0 0.0 7.81 Vp
41.8748 142.7390 60.0 13.1 7.77 Vp
41.9469 142.6648 60.0 12.4 7.22 Vp
42.0189 142.5905 60.0 162.7 7.35 Vp
42.0909 142.5160 60.0 785.9 7.00 Vp
42.1628 142.4413 60.0 634.8 7.47 Vp
42.2347 142.3664 60.0 386.5 7.29 Vp
42.3065 142.2914 60.0 620.3 7.28 Vp
42.3783 142.2162 60.0 667.6 7.52 Vp
42.4500 142.1408 60.0 880.5 7.91 Vp
42.5217 142.0652 60.0 439.3 7.59 Vp
42.5933 141.9895 60.0 531.5 7.82 Vp
42.6649 141.9136 60.0 773.2 8.19 Vp
42.7364 141.8376 60.0 584.4 8.09 Vp
42.8079 141.7613 60.0 908.0 8.51 Vp
42.8793 141.6849 60.0 338.8 8.08 Vp
42.9507 141.6083 60.0 137.1 8.21 Vp
43.0220 141.5315 60.0 22.4 7.87 Vp
43.0933 141.4546 60.0 0.0 7.74 Vp
43.1645 141.3774 60.0 0.0 7.76 Vp
41.7581 142.9352 60.0 0.0 7.82 Vp
41.8303 142.8614 60.0 0.0 7.82 Vp
41.9024 142.7875 60.0 2.6 7.77 Vp
41.9745 142.7133 60.0 41.2 8.16 Vp
42.0465 142.6390 60.0 231.6 7.84 Vp
42.1185 142.5645 60.0 420.9 7.23 Vp
42.1905 142.4898 60.0 329.6 7.27 Vp
42.2624 142.4150 60.0 335.6 7.52 Vp
42.3343 142.3400 60.0 387.1 7.10 Vp
42.4061 142.2648 60.0 509.9 7.14 Vp
42.4778 142.1894 60.0 901.3 7.83 Vp
42.5495 142.1139 60.0 655.3 8.09 Vp
42.6212 142.0382 60.0 515.9 8.18 Vp
42.6928 141.9623 60.0 667.3 8.18 Vp
42.7644 141.8863 60.0 421.0 7.89 Vp
42.8359 141.8100 60.0 364.0 8.04 Vp
42.9073 141.7336 60.0 189.2 8.01 Vp
42.9787 141.6570 60.0 92.8 8.01 Vp
43.0501 141.5803 60.0 13.8 8.10 Vp
43.1214 141.5034 60.0 0.0 7.84 Vp
43.1926 141.4263 60.0 0.0 7.72 Vp
41.7856 142.9837 60.0 0.0 7.82 Vp
41.8578 142.9099 60.0 0.0 7.82 Vp
41.9300 142.8359 60.0 0.0 7.77 Vp
42.0021 142.7618 60.0 33.8 7.52 Vp
42.0742 142.6875 60.0 264.0 8.12 Vp
42.1462 142.6130 60.0 409.8 7.34 Vp
42.2182 142.5384 60.0 428.3 7.14 Vp
42.2901 142.4636 60.0 439.8 7.15 Vp
42.3620 142.3886 60.0 332.6 6.93 Vp
42.4338 142.3134 60.0 521.8 7.26 Vp
42.5056 142.2381 60.0 738.8 7.58 Vp
42.5774 142.1626 60.0 756.8 7.60 Vp
42.6491 142.0869 60.0 735.9 8.09 Vp
42.7207 142.0110 60.0 527.3 7.38 Vp
42.7923 141.9350 60.0 474.5 7.52 Vp
42.8639 141.8588 60.0 484.9 8.04 Vp
42.9353 141.7824 60.0 247.5 8.10 Vp
43.0068 141.7059 60.0 85.2 8.18 Vp
43.0782 141.6291 60.0 9.1 8.00 Vp
43.1495 141.5522 60.0 0.0 7.80 Vp
43.2208 141.4751 60.0 0.0 7.71 Vp
41.8130 143.0321 60.0 0.0 7.82 Vp
41.8853 142.9584 60.0 0.0 7.82 Vp
41.9575 142.8844 60.0 0.0 7.70 Vp
42.0296 142.8103 60.0 12.6 7.69 Vp
42.1018 142.7361 60.0 141.8 7.58 Vp
42.1738 142.6616 60.0 415.2 7.34 Vp
42.2458 142.5870 60.0 583.7 7.34 Vp
42.3178 142.5122 60.0 687.3 7.39 Vp
42.3897 142.4372 60.0 585.8 7.02 Vp
42.4616 142.3621 60.0 532.9 6.99 Vp
42.5334 142.2868 60.0 700.6 7.34 Vp
42.6052 142.2113 60.0 770.4 7.39 Vp
42.6769 142.1356 60.0 623.4 7.64 Vp
42.7486 142.0598 60.0 367.8 7.59 Vp
42.8202 141.9838 60.0 374.0 7.56 Vp
42.8918 141.9076 60.0 457.7 8.00 Vp
42.9633 141.8312 60.0 340.6 8.37 Vp
43.0348 141.7547 60.0 87.9 8.07 Vp
43.1062 141.6780 60.0 5.2 8.05 Vp
43.1776 141.6011 60.0 0.0 7.82 Vp
43.2489 141.5240 60.0 0.0 7.70 Vp
41.8405 143.0806 60.0 0.0 7.82 Vp
41.9128 143.0069 60.0 0.0 7.82 Vp
41.9850 142.9330 60.0 0.0 7.53 Vp
42.0572 142.8589 60.0 18.3 7.53 Vp
42.1293 142.7847 60.0 139.8 7.36 Vp
42.2014 142.7102 60.0 552.6 7.56 Vp
42.2735 142.6356 60.0 761.7 7.50 Vp
42.3455 142.5609 60.0 689.2 7.06 Vp
42.4174 142.4859 60.0 477.4 7.07 Vp
42.4893 142.4108 60.0 337.6 6.94 Vp
42.5612 142.3355 60.0 549.1 7.25 Vp
42.6330 142.2600 60.0 723.0 7.63 Vp
42.7048 142.1844 60.0 305.1 7.04 Vp
42.7765 142.1086 60.0 372.6 7.31 Vp
42.8481 142.0326 60.0 337.7 7.46 Vp
42.9197 141.9564 60.0 275.4 7.69 Vp
42.9913 141.8801 60.0 319.2 8.09 Vp
43.0628 141.8036 60.0 58.9 7.82 Vp
43.1342 141.7269 60.0 9.3 7.97 Vp
43.2056 141.6500 60.0 0.0 7.80 Vp
43.2770 141.5730 60.0 0.0 7.66 Vp
41.8679 143.1292 60.0 0.0 7.82 Vp
41.9402 143.0555 60.0 0.0 7.82 Vp
42.0125 142.9816 60.0 0.1 7.74 Vp
42.0847 142.9075 60.0 12.8 7.67 Vp
42.1569 142.8333 60.0 105.8 7.45 Vp
42.2290 142.7589 60.0 692.3 7.46 Vp
42.3011 142.6843 60.0 1115.5 7.73 Vp
42.3731 142.6096 60.0 562.1 7.00 Vp
42.4451 142.5346 60.0 286.8 6.72 Vp
42.5171 142.4595 60.0 434.8 6.92 Vp
42.5890 142.3843 60.0 452.6 7.06 Vp
42.6608 142.3089 60.0 528.5 7.60 Vp
42.7326 142.2332 60.0 388.6 7.64 Vp
42.8043 142.1574 60.0 702.4 7.88 Vp
42.8760 142.0815 60.0 486.4 8.04 Vp
42.9476 142.0053 60.0 183.6 7.79 Vp
43.0192 141.9290 60.0 302.3 8.29 Vp
43.0908 141.8525 60.0 66.8 7.97 Vp
43.1622 141.7759 60.0 16.5 7.98 Vp
43.2337 141.6990 60.0 0.0 7.79 Vp
43.3050 141.6220 60.0 0.0 7.71 Vp
41.8953 143.1778 60.0 0.0 7.82 Vp
41.9677 143.1041 60.0 0.0 7.82 Vp
42.0400 143.0302 60.0 1.0 7.56 Vp
42.1122 142.9562 60.0 20.3 7.54 Vp
42.1844 142.8820 60.0 129.7 7.43 Vp
42.2566 142.8076 60.0 723.4 7.60 Vp
42.3287 142.7330 60.0 1113.7 7.63 Vp
42.4008 142.6583 60.0 802.7 7.44 Vp
42.4728 142.5834 60.0 398.0 6.94 Vp
42.5448 142.5084 60.0 446.6 6.90 Vp
42.6167 142.4331 60.0 466.6 7.02 Vp
42.6886 142.3577 60.0 962.0 7.76 Vp
42.7604 142.2821 60.0 626.4 7.54 Vp
42.8321 142.2063 60.0 667.0 7.57 Vp
42.9039 142.1304 60.0 265.7 7.39 Vp
42.9755 142.0543 60.0 157.0 7.48 Vp
43.0472 141.9780 60.0 274.9 8.03 Vp
43.1187 141.9015 60.0 82.4 8.05 Vp
43.1902 141.8249 60.0 11.9 7.92 Vp
43.2617 141.7480 60.0 0.0 7.78 Vp
43.3331 141.6711 60.0 0.0 7.66 Vp
41.9227 143.2264 60.0 0.0 7.82 Vp
41.9951 143.1527 60.0 0.0 7.82 Vp
42.0674 143.0789 60.0 4.0 7.82 Vp
42.1397 143.0049 60.0 65.0 7.14 Vp
42.2119 142.9307 60.0 178.3 7.13 Vp
42.2841 142.8564 60.0 486.9 6.91 Vp
42.3563 142.7818 60.0 931.5 6.89 Vp
42.4284 142.7071 60.0 1169.3 7.46 Vp
42.5004 142.6323 60.0 790.3 7.08 Vp
42.5724 142.5572 60.0 653.6 7.12 Vp
42.6444 142.4820 60.0 468.6 7.19 Vp
42.7163 142.4066 60.0 760.6 7.75 Vp
42.7881 142.3310 60.0 376.2 7.19 Vp
42.8600 142.2553 60.0 292.0 7.24 Vp
42.9317 142.1794 60.0 132.3 7.45 Vp
43.0034 142.1033 60.0 145.8 7.76 Vp
43.0751 142.0270 60.0 128.6 7.64 Vp
43.1466 141.9505 60.0 72.6 8.11 Vp
43.2182 141.8739 60.0 6.5 7.92 Vp
43.2897 141.7971 60.0 0.0 7.81 Vp
43.3611 141.7201 60.0 0.0 7.78 Vp
41.9501 143.2751 60.0 0.0 7.82 Vp
42.0225 143.2014 60.0 0.0 7.82 Vp
42.0949 143.1276 60.0 3.9 7.82 Vp
42.1672 143.0536 60.0 40.1 7.03 Vp
42.2394 142.9795 60.0 162.7 7.12 Vp
42.3117 142.9052 60.0 753.8 7.57 Vp
42.3838 142.8306 60.0 899.5 7.09 Vp
42.4560 142.7560 60.0 1379.2 7.11 Vp
42.5281 142.6811 60.0 1094.4 7.16 Vp
42.6001 142.6061 60.0 737.1 7.14 Vp
42.6721 142.5309 60.0 365.7 7.09 Vp
42.7440 142.4555 60.0 449.4 7.43 Vp
42.8159 142.3800 60.0 684.1 7.50 Vp
42.8877 142.3043 60.0 661.7 7.80 Vp
42.9595 142.2284 60.0 171.2 7.58 Vp
43.0312 142.1523 60.0 97.7 7.69 Vp
43.1029 142.0760 60.0 70.9 7.89 Vp
43.1746 141.9996 60.0 59.8 8.11 Vp
43.2461 141.9230 60.0 11.9 7.89 Vp
43.3176 141.8462 60.0 0.0 7.82 Vp
43.3891 141.7693 60.0 0.0 7.73 Vp
41.9775 143.3238 60.0 0.0 7.82 Vp
42.0499 143.2502 60.0 0.0 7.82 Vp
42.1223 143.1764 60.0 0.7 7.82 Vp
42.1946 143.1024 60.0 26.0 7.67 Vp
42.2669 143.0283 60.0 153.2 7.58 Vp
42.3392 142.9540 60.0 738.0 7.78 Vp
42.4114 142.8795 60.0 781.7 7.23 Vp
42.4835 142.8049 60.0 1464.7 7.39 Vp
42.5557 142.7300 60.0 842.4 7.14 Vp
42.6277 142.6550 60.0 501.6 7.31 Vp
42.6997 142.5799 60.0 206.6 7.21 Vp
42.7717 142.5045 60.0 350.2 7.66 Vp
42.8436 142.4290 60.0 932.3 7.96 Vp
42.9155 142.3533 60.0 722.5 7.85 Vp
42.9873 142.2774 60.0 187.7 7.56 Vp
43.0591 142.2014 60.0 114.1 7.90 Vp
43.1308 142.1251 60.0 82.6 8.05 Vp
43.2024 142.0487 60.0 70.3 8.14 Vp
43.2741 141.9722 60.0 23.0 7.93 Vp
43.3456 141.8954 60.0 0.0 7.83 Vp
43.4171 141.8185 60.0 0.0 7.79 Vp
42.0048 143.3726 60.0 0.0 7.82 Vp
42.0772 143.2990 60.0 0.0 7.82 Vp
42.1497 143.2252 60.0 1.2 7.82 Vp
42.2220 143.1513 60.0 49.0 7.62 Vp
42.2944 143.0771 60.0 223.8 7.65 Vp
42.3667 143.0029 60.0 544.1 7.96 Vp
42.4389 142.9284 60.0 749.6 7.48 Vp
42.5111 142.8538 60.0 1219.2 7.27 Vp
42.5832 142.7790 60.0 642.5 6.93 Vp
42.6553 142.7040 60.0 370.7 6.99 Vp
42.7274 142.6289 60.0 163.2 6.95 Vp
42.7994 142.5535 60.0 193.3 6.88 Vp
42.8713 142.4780 60.0 336.3 7.15 Vp
42.9432 142.4024 60.0 443.7 7.72 Vp
43.0151 142.3265 60.0 159.9 7.44 Vp
43.0869 142.2505 60.0 133.7 7.94 Vp
43.1586 142.1743 60.0 123.9 7.95 Vp
43.2303 142.0979 60.0 47.8 7.92 Vp
43.3020 142.0213 60.0 16.3 7.91 Vp
43.3735 141.9446 60.0 0.0 7.83 Vp
43.4451 141.8677 60.0 0.0 7.74 Vp
42.0321 143.4214 60.0 0.0 7.82 Vp
42.1046 143.3478 60.0 0.0 7.82 Vp
42.1770 143.2740 60.0 0.5 7.82 Vp
42.2494 143.2001 60.0 30.2 7.70 Vp
42.3218 143.1261 60.0 236.6 7.93 Vp
42.3941 143.0518 60.0 551.3 8.07 Vp
42.4664 142.9774 60.0 762.0 7.03 Vp
42.5386 142.9028 60.0 888.2 6.85 Vp
42.6108 142.8280 60.0 434.6 6.77 Vp
42.6829 142.7530 60.0 263.4 6.90 Vp
42.7550 142.6779 60.0 286.1 7.35 Vp
42.8270 142.6026 60.0 446.2 6.79 Vp
42.8990 142.5271 60.0 308.8 7.15 Vp
42.9710 142.4515 60.0 343.4 7.72 Vp
43.0428 142.3757 60.0 116.7 7.53 Vp
43.1147 142.2996 60.0 127.2 7.92 Vp
43.1864 142.2235 60.0 61.8 7.86 Vp
43.2582 142.1471 60.0 44.6 7.88 Vp
43.3298 142.0706 60.0 3.1 8.04 Vp
43.4014 141.9939 60.0 0.0 7.90 Vp
43.4730 141.9170 60.0 0.0 7.95 Vp
42.0594 143.4702 60.0 0.0 7.82 Vp
42.1319 143.3967 60.0 0.0 7.82 Vp
42.2044 143.3229 60.0 0.4 7.82 Vp
42.2768 143.2491 60.0 36.8 7.52 Vp
42.3492 143.1750 60.0 154.2 7.88 Vp
42.4216 143.1008 60.0 528.9 7.12 Vp
42.4939 143.0264 60.0 611.6 6.90 Vp
42.5661 142.9518 60.0 759.5 6.89 Vp
42.6383 142.8770 60.0 630.1 7.15 Vp
42.7105 142.8021 60.0 882.2 7.64 Vp
42.7826 142.7270 60.0 2180.5 8.52 Vp
42.8547 142.6517 60.0 888.6 7.92 Vp
42.9267 142.5763 60.0 283.1 7.53 Vp
42.9986 142.5006 60.0 245.9 7.72 Vp
43.0706 142.4248 60.0 262.2 8.14 Vp
43.1424 142.3488 60.0 237.7 8.39 Vp
43.2142 142.2727 60.0 85.9 8.21 Vp
43.2860 142.1964 60.0 51.9 8.20 Vp
43.3577 142.1198 60.0 4.0 8.02 Vp
43.4293 142.0432 60.0 0.0 7.79 Vp
43.5009 141.9663 60.0 0.0 7.80 Vp
42.0866 143.5191 60.0 0.0 7.82 Vp
42.1592 143.4456 60.0 0.0 7.82 Vp
42.2317 143.3719 60.0 1.6 7.82 Vp
42.3042 143.2980 60.0 15.3 7.52 Vp
42.3766 143.2240 60.0 54.2 7.49 Vp
42.4490 143.1498 60.0 214.1 7.09 Vp
42.5213 143.0754 60.0 459.5 7.02 Vp
42.5936 143.0008 60.0 764.1 7.26 Vp
42.6659 142.9261 60.0 609.4 7.15 Vp
42.7380 142.8512 60.0 900.5 7.42 Vp
42.8102 142.7761 60.0 2237.0 8.04 Vp
42.8823 142.7009 60.0 1009.9 8.25 Vp
42.9543 142.6254 60.0 664.0 8.24 Vp
43.0263 142.5498 60.0 284.8 7.84 Vp
43.0983 142.4741 60.0 239.6 8.04 Vp
[truncated: 1,851,582 more chars]
